# Supplementary material for: The KRAB Domain of ZNF10 Guides the Identification of Specific Amino Acids That Transform the Ancestral KRAB-A-Related Domain Present in Human PRDM9 into a Canonical Modern KRAB-A Domain
Source: MDPI journal article supplement (doi:10.3390/ijms23031072), 2022-01-19

**A**

|             |            |            |            |            |
|-------------|------------|------------|------------|------------|
| 10          | 20         | 30         | 40         | 50         |
| MDAKSLTAW   | RTLVTFKDVF | VDFTREEWKL | LDTAQQIVYR | NVMLENYKNL |
| 60          | 70         | 80         | 90         | 100        |
| VSLGYQLTKP  | DVILRLEKGE | EPWLVEREIH | QETHPDSETA | FEIKSSVSSR |
| 110         | 120        | 130        | 140        | 150        |
| SIFKDKQSCD  | IKMEGMARND | LWYLSLEEVW | KCRDQLDKYQ | ENPERHLRQV |
| 160         | 170        | 180        | 190        | 200        |
| AFTQKKVLTQ  | ERVSESGKYG | GNCLLPAQLV | LREYFHKRDS | HTKSLKHDLV |
| 210         | 220        | 230        | 240        | 250        |
| LNGHQDSCAS  | NSNECGQTFC | QNIHLIQFAR | THTGDKSYKC | PDNDNSLTHG |
| 260         | 270        | 280        | 290        | 300        |
| SSLGISKGIH  | REKPYECKEC | GKFFSWRSNL | TRHQLIHTGE | KPYECKECGK |
| 310         | 320        | 330        | 340        | 350        |
| SFSRSSHLIG  | HQKTHTGEEP | YECKECKGSF | SWFSHLVTHQ | RTHTGDKLYT |
| 360         | 370        | 380        | 390        | 400        |
| CNQCCKGSFVH | SSRLIRHQRT | HTGEKPYECP | ECGKSFRQST | HLILHQRTHV |
| 410         | 420        | 430        | 440        | 450        |
| RVRPYECNEC  | GKSYSQRSHL | VVHHRIHTGL | KPFECKDCGK | CFSRSSHLYS |
| 460         | 470        | 480        | 490        | 500        |
| HQRTHTGEPK  | YECHDCGKSF | SQSSALIVHQ | RIHTGEKPYE | CCQCCKAFIR |
| 510         | 520        | 530        | 540        | 550        |
| KNDLIKHQRI  | HVGEETYKCN | QCGIIFSQNS | PFIVHQIAHT | GEQFLTCNQC |
| 560         | 570        |            |            |            |
| GTALVNTSNL  | IGYQTNHIRE | NAY        |            |            |

**B**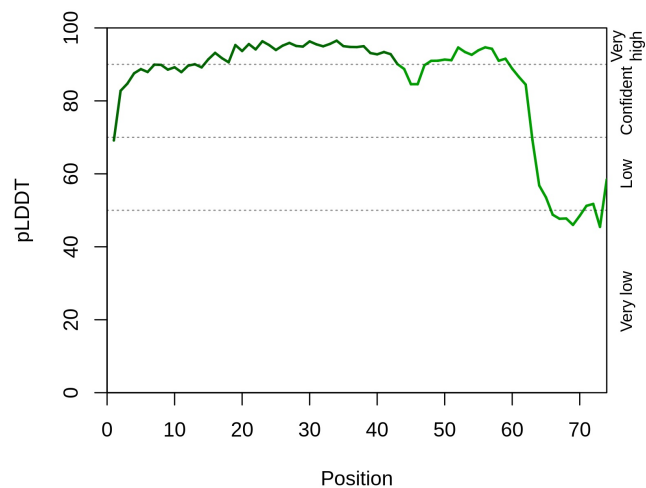**C**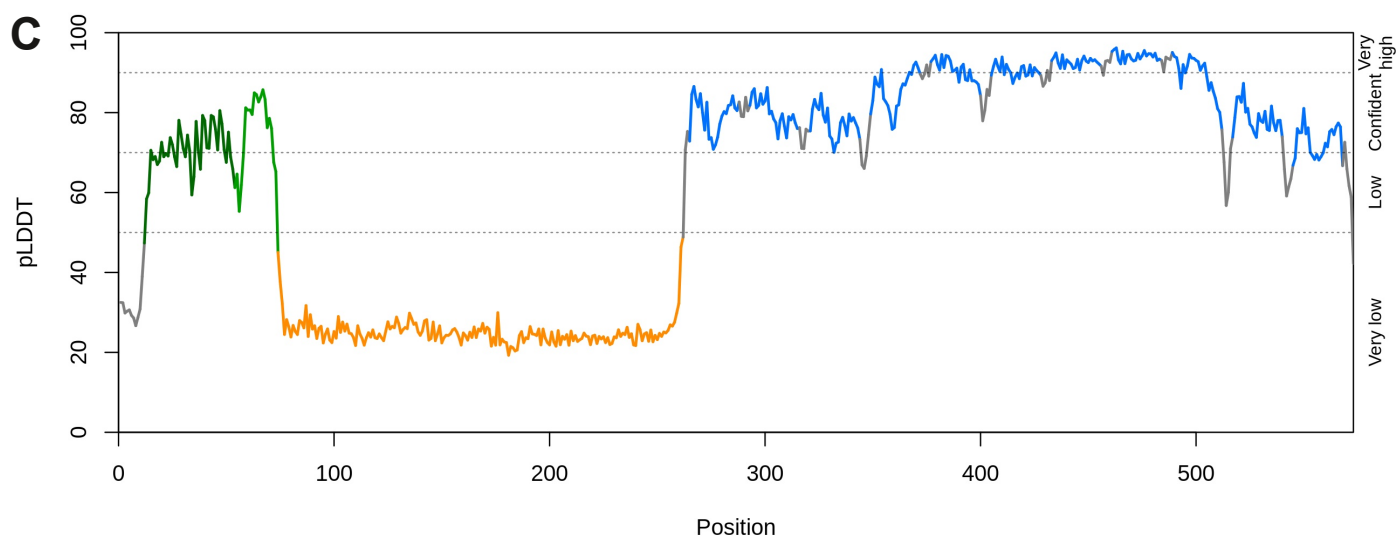**D**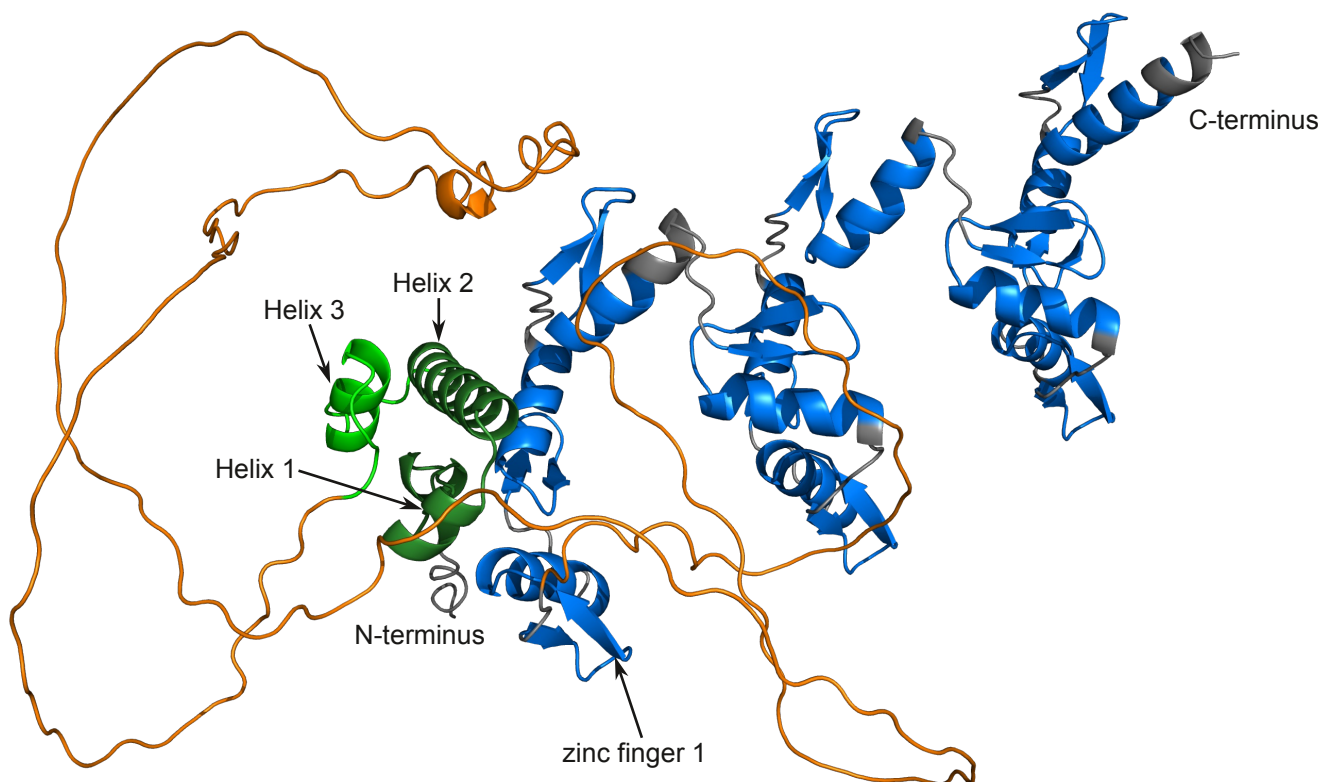

Supplement: s1 [file s1]
