# Supplementary material for: The KRAB Domain of ZNF10 Guides the Identification of Specific Amino Acids That Transform the Ancestral KRAB-A-Related Domain Present in Human PRDM9 into a Canonical Modern KRAB-A Domain
Source: Int J Mol Sci. 2022 Jan 19;23(3):1072. doi: 10.3390/ijms23031072 (PMC8835667; doi:10.3390/ijms23031072)
Supplement: Supplementary file 1 [file ijms-23-01072-s001.zip]

Archive with 7 entries (7 files):
- Figure_S1.pdf
- Figure_S2.pdf
- HMMs.zip
- ijms-1537523 Supplementary Files.pdf
- PDBs.zip
- Table_S1.xlsx
- Table_S2.xlsx
