# Supplementary material for: The KRAB Domain of ZNF10 Guides the Identification of Specific Amino Acids That Transform the Ancestral KRAB-A-Related Domain Present in Human PRDM9 into a Canonical Modern KRAB-A Domain
Source: Int J Mol Sci. 2022 Jan 19;23(3):1072. doi: 10.3390/ijms23031072 (PMC8835667; doi:10.3390/ijms23031072)
Supplement: Supplementary file 1 [file ijms-23-01072-s001.zip › Table_S1.xlsx]

## Sheet: aKRAB-A proteins
no.	Subgroup	Gene names	Accession (protein preferred)	species abbr.	species	species name	Taxonomy	Description	protein sequence	x	IPR [KRAB-related]	PFAM/IPR [KRAB]	PFAM/IPR [SSXRD]	PFAM [SET]	PFAM [ZnF_C2H2]	KRAB-A position [1]	hs mKRAB-A HMM E-value [1]	KRAB-A sequence [1]	KRAB-A position [2]	aKRAB-A PRDM9 ortho HMM E-value [2]	aKRAB-A sequence [2]	KRAB-A position [3]	aKRAB-A SSX ortho/para HMM E-value [3]	aKRAB-A sequence [3]	KRAB-A position [4]	a KRAB-A lcha ZNF HMM E-value [4]	aKRAB-A sequence [4]	KRAB-A position [5]	all aKRAB-A HMM E-value [5]	aKRAB-A sequence [5]
1	PRDM9 ortho	-	A0A444UMN6	arut	Acipenser ruthenus	Sterlet sturgeon	Actinopterygii (ray-finned fishes)	Putative histone-lysine N-methyltransferase PRDM7	MYFSKKKWAELQEWEKVIYKNQKQNHEAMIAIGLNSPKPEFMRQPPRRKQTPVEDNGDSDPAHAKEGSVQGHTSSVYSNHKKQQVTYAEIDEPNDDDYFYCNICHSFFLDKCNIHGPPVFIKNPLVEIGVANRARLTLPQGMIIKVSKIPNAGLGVWNERRVIPNSIHFGPYEGELTSEKEAALSGYSWMIRKGNSDHEYLDAKNEANSNWMRYVNCARNDEEQNLVAFQYKGQIFYRSCKPIPPGCELLVWYGDEYGKELGVGLDFMWERSIEIIAAWPALLPKCPAPPLTGVPSASAIAGVPGADVSLASGVPSAIATASCMSEGASIFTAGLPCTAARDTIVSVAAASATTAGERSLGCRKGVKRAPLTEGPGPPRHKEDRRLHLRTARQPTHKDL…					PF00856 [SET]		1/1:1:32	0.0013	MYFSKKKWAELQEWEKVIYKNQKQNHEAMIAI	1/1:1:32	2.3e-17	MYFSKKKWAELQEWEKVIYKNQKQNHEAMIAI	1/1:1:32	9.4e-07	MYFSKKKWAELQEWEKVIYKNQKQNHEAMIAI	1/1:1:32	4.8e-09	MYFSKKKWAELQEWEKVIYKNQKQNHEAMIAI	1/1:1:32	2.4e-15	MYFSKKKWAELQEWEKVIYKNQKQNHEAMIAI
2	PRDM9 ortho		XP_030636171	ccha	Chanos chanos	milkfish	Actinopterygii (ray-finned fishes)	PREDICTED: Chanos chanos zinc finger protein 271-like (with SET and ZnF domains)	MSSSDEDDFAELRVYFTKLEWARLESCEKSRYRNMKRNHEFMISIGLNSTVPTFMRRGRARRAPPVDSSDSEEEWTPSLGRRPAEMLRREGLKEQTTELNGHSEGRTLRSRPRISYTEEEEPKDEDYLYCEDCRSFFISECEVHGPPTFIPDIPVPMGVTDRARRTLPSGLEVRRSSIPNAGLGVFNQGDTVPRGTHFGPYQGQLSDRGEAVDSGYSWVIFRSRLPDEYIDAKRETHSNWMRYVNCARNDEEQNLVAFQYRGGILYRCCRPIVPGEELLVWYGEEYAKDLGITFDYLWDRKCSSAEDKSSHVFSCSLCPFSYTAQIYLHKHIKRCHHVEYARLLKTGQIRAEDLISSKKPNTQRSSSDIIFASVQSASLTPRQRKTGTKRTHHCSQCGK…							1/1:6:45	2.2e-06	EDDFAELRVYFTKLEWARLESCEKSRYRNMKRNHEFMISI	1/1:8:45	3.6e-24	DFAELRVYFTKLEWARLESCEKSRYRNMKRNHEFMISI	1/1:8:45	7.6e-11	DFAELRVYFTKLEWARLESCEKSRYRNMKRNHEFMISI	1/1:8:45	2.1e-10	DFAELRVYFTKLEWARLESCEKSRYRNMKRNHEFMISI	1/1:8:45	8.9e-21	DFAELRVYFTKLEWARLESCEKSRYRNMKRNHEFMISI
3	PRDM9 ortho		XP_028974054	eluc	Esox lucius	northern pike	Actinopterygii (ray-finned fishes)	histone-lysine N-methyltransferase PRDM9 (LOC105009593), transcript variant X1	MSSSEEDDFDDLKRYFSKTEWIHLVKAEKVRYRSVRRNHLAMLAIGLNSPVPAFMRKGRPQMDNTAPLFEPSDSEEEDEWTPHLERYTPAPRSLRSPTRRPAASRVGTTRRPAASRVGTTRRPAASRVGTTGRPTAPHLDNAATSTEQEGEADTQAVPQREAQQPHPKPTASGLSKRQWLERRGQTQDLNYQHGKNLRDRTRVSYIEEEEPKDDHFLFCEDCCDFFIGKCELHGAPVFIPDTPAPQGAPDRARLTLPPGLEIKTSGIPGAGLGVFNQGDTVAVGTHYGPYEGENTEKDQAMESGYSWVVGGIYKNRLLDDYIDAKRETYSNWMRYVNCARNEEEQNLVAFQYRGGILYRCCKPIAVGDELLVWYGEEYARDLGIVFDYIWDKKSSANDV…							1/1:6:46	1.9e-05	EDDFDDLKRYFSKTEWIHLVKAEKVRYRSVRRNHLAMLAIG	1/1:8:45	3.1e-22	DFDDLKRYFSKTEWIHLVKAEKVRYRSVRRNHLAMLAI	1/1:8:45	5.1e-10	DFDDLKRYFSKTEWIHLVKAEKVRYRSVRRNHLAMLAI	1/1:8:45	1.9e-07	DFDDLKRYFSKTEWIHLVKAEKVRYRSVRRNHLAMLAI	1/1:8:45	6e-17	DFDDLKRYFSKTEWIHLVKAEKVRYRSVRRNHLAMLAI
4	PRDM9 ortho	-	A0A3P8XLZ3	eluc	Esox lucius	northern pike	Actinopterygii (ray-finned fishes)	Uncharacterized protein	GKKREGWLFFMKLYFSKTEWIHLVKAEKVRYRSVRRNHLAMLAIGLNSPVPAFMRKGRPQMDNTAPLFEPSDSEEEDEWTPHLERYTPGRTAVNLKTLYLLRYHQESSRGSLQIPPVNCLSLFFXXXXXXXXXERRGQTQDLNYQHGKNLRDRTRVSYIEEEEPKDDHFLFCEDCCDFFIGKCELHGAPVFIPDTPAPQGAPDRARLTLPPGLEIKTSGIPGAGLGVFNQGDTVAVGTHYGPYEGENTEKDQAMESGYSWVIYKNRLLDDYIDAKRETYSNWMRYVNCARNEEEQNLVAFQYRGGILYRCCKPIAVGDELLVWYGEEYARDLGIVFDYIWDKKSSANGMDMVRNNAQVGRGI					PF00856 [SET]		1/1:7:45	0.0002	WLFFMKLYFSKTEWIHLVKAEKVRYRSVRRNHLAMLAIG	1/1:7:44	2.2e-18	WLFFMKLYFSKTEWIHLVKAEKVRYRSVRRNHLAMLAI	1/1:7:44	2e-05	WLFFMKLYFSKTEWIHLVKAEKVRYRSVRRNHLAMLAI	1/1:7:44	0.0003	WLFFMKLYFSKTEWIHLVKAEKVRYRSVRRNHLAMLAI	1/1:7:44	5.5e-12	WLFFMKLYFSKTEWIHLVKAEKVRYRSVRRNHLAMLAI
5	PRDM9 ortho		XP_030231029	gmor	Gadus morhua	Atlantic cod	Actinopterygii (ray-finned fishes)	histone-lysine N-methyltransferase PRDM9-like (LOC115557390)	MCRGLYQKGRDFAQVFPLLLSLGPNQLNNRISDLHFCAIQVHVTIDLDSSCRPTSQMNNSVEEEDFADIRAYFSTTKWNRLCMAEKKRFLQIKENHLVLASLGLSFVAPAFMRREKPGQVRVCSPDETDSEEEQLWSSGLTGARVWKPPTVRQGSLQQPSTSDAVSVQSLSGRGWSDQEVSGGPTPSHPEIDPPGGGVERGSAVQEEVSLVLHEHLQGSSVYSREMNLRNVLRVNYQEPEVPKDDDYFFCDECRTFFLEECQVHGPIVFMADRPVAVREKDRAKKTLPAGFEIRDSGIPGAGLGVFYCGDGGLPIGTHFGPYEGHRTDEEGALESGYSWEIYKSRHSDYIDAKRETLSNWMRYVNCARNEEEQNLIAFQHKGGILYRTCGFVTPGAELL…							1/1:63:102	6.6e-05	EEDFADIRAYFSTTKWNRLCMAEKKRFLQIKENHLVLASL	1/1:65:102	1.6e-17	DFADIRAYFSTTKWNRLCMAEKKRFLQIKENHLVLASL	1/1:65:102	4.2e-08	DFADIRAYFSTTKWNRLCMAEKKRFLQIKENHLVLASL	1/1:65:102	1.3e-07	DFADIRAYFSTTKWNRLCMAEKKRFLQIKENHLVLASL	1/1:65:102	2.1e-13	DFADIRAYFSTTKWNRLCMAEKKRFLQIKENHLVLASL
6	PRDM9 ortho		ENSHHUP00000002270	hhuc	Hucho hucho	Huchen	Actinopterygii (ray-finned fishes)	protein with KRAB-A-related and SET domain	AAEDGKANTCYTSGEMSSSDEDDCEEMKVNFSRSKWASLAEWEKKRYRNMKRNHLAMLAIGLQALVPVFMRRGREGREREHRPPPQGPSDTVEEEEEEEWTPHLERQHQGKTQRRREKNSRTPSTETTSKPPQSRTPTASTSKPPQSRTPSTASTSKPPQSRTSSTASTSKPPQSRTSSTASTSKPPQIFCFSSLSVCEECKSFFIEECELHGPPHFILDTPAPLGAPDRARLTLPPGLEVRTSAIPGAGLGVFNHGHKFPDKELAMESGYSWVIYKSKQSDKYIDAKRDTHSNWMRYVNCARSEEEQNLVAFQYRGGILYRCCKPIAVGEELLVWYGEEYARDLGIIFDFLWDRKSSARGERPYHCSVWEEVQCVRTFKDTPVYSHRREAVSLFTVWE…							1/1:21:60	7.3e-05	EDDCEEMKVNFSRSKWASLAEWEKKRYRNMKRNHLAMLAI	1/1:23:60	1.1e-21	DCEEMKVNFSRSKWASLAEWEKKRYRNMKRNHLAMLAI	1/1:23:60	9.5e-08	DCEEMKVNFSRSKWASLAEWEKKRYRNMKRNHLAMLAI	1/1:23:60	2.9e-08	DCEEMKVNFSRSKWASLAEWEKKRYRNMKRNHLAMLAI	1/1:23:60	3.1e-17	DCEEMKVNFSRSKWASLAEWEKKRYRNMKRNHLAMLAI
7	PRDM9 ortho		ENSHHUP00000063236	hhuc	Hucho hucho	Huchen	Actinopterygii (ray-finned fishes)	protein with KRAB-A-related and SET domain and C2H2 zinc fingers	MSSSEEDDFHDLKPYFSKMEWTHLVKCEKVRYRNLKRNHLAMLTIGLNSQVPGFMRRGRPKLLNTALLFAPSDSEEDEWTPRLERCPPASRSFRLPTRRPAVSQGVPQPDKPATPATPTVQQPPSGEEAGPSNMGTEPAQTLMEELTEEEVAFLRDSSTADTHSGAQEGLGVKEGQSEASNSGGEAGSSTQQGALLHPKPSTSGLSKREWLKRQQSELNTYKRSKNLRDRPRITYTEEEVPKDDHYLFCEDCKSFFMEECVVHGPPLFVPDIPAPLGASDRARLTLPSGLEIRTSSIPEAGLGVFNQGNTVPAGVHYGPYEGELTDKDQAMESGYSWVIYKSRHWDDYIDAGRDTHSNWMRYVNCARREEEQNLVSFQYRGGILYRCCKPIAVGEELLV…							1/1:6:43	0.00013	EDDFHDLKPYFSKMEWTHLVKCEKVRYRNLKRNHLAML	1/1:8:45	6.9e-24	DFHDLKPYFSKMEWTHLVKCEKVRYRNLKRNHLAMLTI	1/1:8:45	5.1e-10	DFHDLKPYFSKMEWTHLVKCEKVRYRNLKRNHLAMLTI	1/1:8:45	1.1e-07	DFHDLKPYFSKMEWTHLVKCEKVRYRNLKRNHLAMLTI	1/1:8:45	5.1e-18	DFHDLKPYFSKMEWTHLVKCEKVRYRNLKRNHLAMLTI
8	PRDM9 ortho		A0A060YW67	omyk	Oncorhynchus mykiss	Rainbow trout	Actinopterygii (ray-finned fishes)	KRAB-related domain-containing protein	MSSSDEDDFHDLKTYFSKMEWTHLVKCEKVRYRNLKRNHLAMLTIGLKSPVPAFMRRSRPKLLNTALLFAPSDSEEDEWTPRLERCPPASRSFRRPTRRPAASQGVPQPDKPATPATLTVQQPPSGEEAGPSNMGTEPAQPLMEELTEEEVAFLRDGSPADTHSGVQEGLGATEGQSEATPSTSGGEAGSSTQQGARLLHPKPSTSGLSKREWLERQKAELNTYKRSRNLRDRPRITYTEEEVPKDDHYLCESLSLNLSLCIYHFLSLSIYLSLRIKTFQMSYYVYMQ							1/1:6:43	6e-05	EDDFHDLKTYFSKMEWTHLVKCEKVRYRNLKRNHLAML	1/1:8:45	2.1e-24	DFHDLKTYFSKMEWTHLVKCEKVRYRNLKRNHLAMLTI	1/1:8:45	1.7e-10	DFHDLKTYFSKMEWTHLVKCEKVRYRNLKRNHLAMLTI	1/1:8:45	3.7e-08	DFHDLKTYFSKMEWTHLVKCEKVRYRNLKRNHLAMLTI	1/1:8:45	1.1e-18	DFHDLKTYFSKMEWTHLVKCEKVRYRNLKRNHLAMLTI
9	PRDM9 ortho	-	A0A3B3RKW9	pkin	Paramormyrops kingsleyae	elephantfish species	Actinopterygii (ray-finned fishes)	Uncharacterized protein	MEGASGTNVSEEDDYADIRADFSKAKWVRLRRCEKVHYRNMKRNHQAMLDMGLNSTTSAFKTRGRSRRVMAERPVNGKHSDSEDGWTPHSLSRSSDNTHPEVFSQQMPSCSKVSCLMNQKPSQQGVGEVKKEQREHLISEGEGTTSESHYKVKWRMKGAEVQDVTGEELTGSLPLNTDGRRRSKRIVKPPNQAWRADESSQIFACTQSPSSNTADIDQHRHIKRSHPKEYVRQLRAGSVNTTQHLPTSPGPSAAQPSTDTLSTLDGMSTDTLTALQGSQGEKTFSLNRGCKKHRQTNTGEKPYQCSQCGKSFNQLGNLKAHQRIHTGERPYHCSQCGKSFSQLGTLKGHQRIHKGERPYQCSQCGKSFNELRTLNRHQRIHTGERPYQCSQCGKSFSQL…						PF00096 [ZnF_C2H2]	1/1:12:51	0.00034	EDDYADIRADFSKAKWVRLRRCEKVHYRNMKRNHQAMLDM	1/1:14:51	1.5e-22	DYADIRADFSKAKWVRLRRCEKVHYRNMKRNHQAMLDM	1/1:14:51	3.1e-10	DYADIRADFSKAKWVRLRRCEKVHYRNMKRNHQAMLDM	1/1:14:51	1.3e-06	DYADIRADFSKAKWVRLRRCEKVHYRNMKRNHQAMLDM	1/1:14:51	2e-16	DYADIRADFSKAKWVRLRRCEKVHYRNMKRNHQAMLDM
10	PRDM9 ortho	-	A0A3B3S3R7	pkin	Paramormyrops kingsleyae	elephantfish species	Actinopterygii (ray-finned fishes)	Uncharacterized protein	MEASVPTQENYTEIQAHFSKAEWVRLQRWEKLRYRNMKRNHQAMLAIGLNSTTPAFMRGGRSRRITAEGPGNDKRSDSEEEWTPHLLRRLPSNTERRGETANHRAPTMTGHTFTQSLMHSSTSLEHRGMSESLHCEQHTVNMTGYRRGCNLRNTPKILYTEGEELRDDDYLYCEDCLSFFTEQCEVHGPPVFISDSSAVMGVPGRALLTLPPGLEVRSSSIPGAGQGVFNQGQTVPRGVHYGPYEGEVTDREQAIDSGYSWVVYKGKQCETYIDARRESHSNWMRYVNCARDDEEQNLVAFQHKGNILYRCCKPIAPRQELLVWYGEDYAKDLGITFDYLWSKKCSSEARRVVESSQGFPCSQCPFSFTAEIFLQRHVKRSHPEEYVRQLRAGSVNASQ…					PF00856 [SET]	PF00096 [ZnF_C2H2]	1/1:8:47	4e-05	QENYTEIQAHFSKAEWVRLQRWEKLRYRNMKRNHQAMLAI	1/1:10:47	2.4e-24	NYTEIQAHFSKAEWVRLQRWEKLRYRNMKRNHQAMLAI	1/1:10:47	5.7e-11	NYTEIQAHFSKAEWVRLQRWEKLRYRNMKRNHQAMLAI	1/1:10:47	3e-10	NYTEIQAHFSKAEWVRLQRWEKLRYRNMKRNHQAMLAI	1/1:10:47	5.7e-20	NYTEIQAHFSKAEWVRLQRWEKLRYRNMKRNHQAMLAI
11	PRDM9 ortho		XP_023697067	pkin	Paramormyrops kingsleyae	elephantfish species	Actinopterygii (ray-finned fishes)	histone-lysine N-methyltransferase PRDM9-like isoform X1	MSSSEEKHLVLHGLGECCKNRIHKENYTEIQAHFSKAEWVRLQRWEKLRYRNMKRNHQAMLAIGLNSTTPAFMRGGRSRRITAEGPGNDKRSDSEEEWTPHLLRRLPSNTERRGMSESLHCEQHTVNMTGYRRGCNLRNTPKILYTEGEELRDDDYLYCEDCLSFFTEQCEVHGPPVFISDSSAVMGVPGRALLTLPPGLEVRSSSIPGAGQGVFNQGQTVPRGVHYGPYEGEVTDREQAIDSGYSWVVYKGKQCETYIDARRESHSNWMRYVNCARDDEEQNLVAFQHKGNILYRCCKPIAPRQELLVWYGEDYAKDLGITFDYLWSKKCSSEARRVVESSQGFPCSQCPFSFTAEIFLQRHVKRSHPEEYVRQLRAGSVNASQHFSTSAGRSTAQPS…							1/1:24:63	4.6e-05	KENYTEIQAHFSKAEWVRLQRWEKLRYRNMKRNHQAMLAI	1/1:26:63	2.4e-24	NYTEIQAHFSKAEWVRLQRWEKLRYRNMKRNHQAMLAI	1/1:26:63	5.7e-11	NYTEIQAHFSKAEWVRLQRWEKLRYRNMKRNHQAMLAI	1/1:26:63	3e-10	NYTEIQAHFSKAEWVRLQRWEKLRYRNMKRNHQAMLAI	1/1:26:63	5.7e-20	NYTEIQAHFSKAEWVRLQRWEKLRYRNMKRNHQAMLAI
12	PRDM9 ortho		A0A3B3SA31	pkin	Paramormyrops kingsleyae	elephantfish species	Actinopterygii (ray-finned fishes)	KRAB-related domain-containing protein	MPEPPHLAPLDAEEQRLYFESLPNDRAPHPISKGEPDHRAEETHFDIRADFSKAEWVRLRRCEKVHYRNMKRNHQAMLDMGRLRAPASVMVTKGDWIHAHKQQTHETQGKHWRCKKILIPMLSYK							1/1:41:80	4.5e-05	EETHFDIRADFSKAEWVRLRRCEKVHYRNMKRNHQAMLDM	1/1:43:80	2e-22	THFDIRADFSKAEWVRLRRCEKVHYRNMKRNHQAMLDM	1/1:43:80	2.2e-10	THFDIRADFSKAEWVRLRRCEKVHYRNMKRNHQAMLDM	1/1:43:80	7.8e-07	THFDIRADFSKAEWVRLRRCEKVHYRNMKRNHQAMLDM	1/1:43:80	2.7e-17	THFDIRADFSKAEWVRLRRCEKVHYRNMKRNHQAMLDM
13	PRDM9 ortho		ENSSTUP00000033396	stru	Salmo trutta	River trout	Actinopterygii (ray-finned fishes)	ENSSTUT00000034891.1 peptide: ENSSTUP00000033396 (with SET and ZnF domains)	MSSSEEDDFHDLKTYFSKIEWTHLVKCEKVRYRNLKRNHLAMLTIGLNSPVPAFMRRGRPKLVNNAPLLAPSDSEEDEWTPRLERCPPAPRSFRPPTRRPAVSRGVPQPDNPATPTVQPLSGEEAGPSNMGTEPPQPFLEELTEEVVFLRDGSTADTHSGEQEGLGDKEGQSEATSSTSGGETGRSTQGGGADTPALTQRGTPLLHPKPSTSGLSKREWLERQKALNTYKRGRNLRDRPRITYTEEEDPKDDHYLYCEDCKSFFMEECELHGPAFFVPDIPVPLGAPDRARLTLPSGLEVRTSSIPEAGLGVFNQGNTVPAGAHYGPYEGEITDKDQAMESGYSWVIYKSRHWDDYIDAGRDTHSNWMRYVNCARSEEEQNLVAFQYRGGILYRCCKPI…							1/1:6:43	7.3e-05	EDDFHDLKTYFSKIEWTHLVKCEKVRYRNLKRNHLAML	1/1:8:45	6.2e-24	DFHDLKTYFSKIEWTHLVKCEKVRYRNLKRNHLAMLTI	1/1:8:45	3.1e-10	DFHDLKTYFSKIEWTHLVKCEKVRYRNLKRNHLAMLTI	1/1:8:45	6.7e-08	DFHDLKTYFSKIEWTHLVKCEKVRYRNLKRNHLAMLTI	1/1:8:45	2.7e-18	DFHDLKTYFSKIEWTHLVKCEKVRYRNLKRNHLAMLTI
14	PRDM9 ortho		XP_019646360	bbel	Branchiostoma belcheri	Belcher's lancelet	Cephalochordata	histone-lysine N-methyltransferase PRDM9-like	MASVSSSSSSGSEDESNDKQAASTSGSSNPFANMIDPDFDMSKVPETEDIRIEQYFSKEELAELSKIEMTRYRNMKRNYDVMRMLGLPGKKPYFMERNRRSLVQPKEPPTPPLTSSEEEEDEEWTPELERKKNQRPKKPWFLLPPKKPRMSKPKPKTTGPQKNSKVKKKAEATVSKAPSDDDVAKTFLGFQAEEVAEIRAATAAGLAELEKKMKALELEIQEEEAAGPQDGQEEGSESDISTDLEEELLTTTLQPPKLQELKEPEPVVDREETQRSRYPKRNIPRKNYKEVELPDDDHYLFCEDCNELYEGDCPVHGPLTVVKDKVVPKGEPNRAVHTLPDYLSVCPSKIKGAGDGVWLDGQAMPKNLVFGPYDGKITGPEIGLTSGYAWQISKNDKVK…							1/1:44:85	0.00014	VPETEDIRIEQYFSKEELAELSKIEMTRYRNMKRNYDVMRML	1/1:48:85	1.9e-20	EDIRIEQYFSKEELAELSKIEMTRYRNMKRNYDVMRML	1/1:48:85	2.4e-10	EDIRIEQYFSKEELAELSKIEMTRYRNMKRNYDVMRML	1/1:48:85	2e-07	EDIRIEQYFSKEELAELSKIEMTRYRNMKRNYDVMRML	1/1:48:85	1.5e-17	EDIRIEQYFSKEELAELSKIEMTRYRNMKRNYDVMRML
15	PRDM9 ortho		XP_002591079	bflo	Branchiostoma floridae	Lancelet	Cephalochordata	hypothetical protein BRAFLDRAFT_119068 [Branchiostoma floridae] with SET and ZnF domains	MASVSSASSSGSDDENNDKQAASTSASSNPFANMIDTDFDMSKVPETEDIRIEQYFSKEELAELTKIEMTRYRNMKRNYDVMRMLGLPGKKPYFMEKNRRSLVQPKEPPTPPLTSSESEEDEEWTPELERKKNQRPKKPWFLLPPKKPRMPKPKPQTTGSHPKSKAKKKAEATVSKAPKESDDEDAKTFPGFQPEEVAEMQAATAASIAELEKKMEELELEIQQWEAAGSQDGQEEGSESDISTDLEEELLTTTLQPVKQQEPPKKEPVEDTEEPRKSRYPQRNIPRKDYKEVELPDDDHYLYCEDCNELYEGDCPVHGPLIVVKDKEVPKGVENRAVHTLPDYLSVCPSKIKGAGDGVWLDGKAMPKNFVFGPYDGKITGPEIGMTSGYAWQISKNDK…					PF00856 [SET]	PF00096 [ZnF_C2H2]	1/1:44:85	0.00016	VPETEDIRIEQYFSKEELAELTKIEMTRYRNMKRNYDVMRML	1/1:48:85	7.8e-20	EDIRIEQYFSKEELAELTKIEMTRYRNMKRNYDVMRML	1/1:48:85	2.4e-10	EDIRIEQYFSKEELAELTKIEMTRYRNMKRNYDVMRML	1/1:48:85	2.1e-07	EDIRIEQYFSKEELAELTKIEMTRYRNMKRNYDVMRML	1/1:48:85	3.4e-17	EDIRIEQYFSKEELAELTKIEMTRYRNMKRNYDVMRML
16	PRDM9 ortho		A0A401RS19	cpun	Chiloscyllium punctatum	Brownbanded bambooshark	Chondrichthyes (cartilaginous fishes)	Uncharacterized protein	MRSGKALCAPRRLSFVSLLSEEQLHQEAAEALMVLSYSPTPASSQAPSSGQRHQDGSLPQPPAPSPPSASHGHSQSMSTTTVGGGGLIGSMAPPAVSLDCAVVTPAEGAEIRLQADPLESCNMNGSREPTGPGTPCWNLASAPLVEMAQCLSDDKDEGDKRNVLGVELTCGVCMGFYQDPVRLPCEHSFCKVCIDQVFENVEPESDYRCPICRKSYQSKPKMTKHLVLVRLVEAYNEMMHGKVRPASLEKVEDSHTAVESSLGGRTCRIHSGEELTHLCFKDWELLCPLCVSNDHHVNHTATPLVQVTEDWKKMLPNIVESLEENHAKLSVQVMQYAELEEKANVEIADAKDRAEGQIDRLIEFLQNEKERLMIDMQHVGNDHLDSIHGLQAQATHRLE…			PF01352 [KRAB]				1/1:517:556	1.6e-07	KDQFKDIAHHFSKDEWAELSEWEKTRYKNVKRNYEAMLAI	1/1:519:556	2.3e-28	QFKDIAHHFSKDEWAELSEWEKTRYKNVKRNYEAMLAI	1/1:519:556	4.9e-15	QFKDIAHHFSKDEWAELSEWEKTRYKNVKRNYEAMLAI	1/1:519:556	9.7e-14	QFKDIAHHFSKDEWAELSEWEKTRYKNVKRNYEAMLAI	1/1:519:556	1.2e-24	QFKDIAHHFSKDEWAELSEWEKTRYKNVKRNYEAMLAI
17	PRDM9 ortho		A0A401RS11	cpun	Chiloscyllium punctatum	Brownbanded bambooshark	Chondrichthyes (cartilaginous fishes)	KRAB-related domain-containing protein	MRAADVDAWEPRAGEREDLLKEKRPPTVAAKLQVEDQTPYGMSLEETLKFLLEGGAPGVSSRPYQITLGADDECHGVQCLLPAHSEDLEDILIKNGRSGKVAHPTFIKDQFKDIAHHFSKDEWAELSEWEKVRYKNVKRNYEAMLAIEKLETLLDTMHRTSLAIFGKKTCKTHDWFEAMATKMTAVVEVKCVALAQYKWSASGKNLQILRAARNQVQQTVRRCTNWYGTQLSEKIQTGNIRGVYKGIKKALGPAQSKTAPLKSSTGEVITNAGHQMERWVEQYSDVYCIRFTT			PF01352 [KRAB]				1/1:108:147	5.5e-07	KDQFKDIAHHFSKDEWAELSEWEKVRYKNVKRNYEAMLAI	1/1:110:147	1.6e-28	QFKDIAHHFSKDEWAELSEWEKVRYKNVKRNYEAMLAI	1/1:110:147	4.3e-15	QFKDIAHHFSKDEWAELSEWEKVRYKNVKRNYEAMLAI	1/1:110:147	2e-13	QFKDIAHHFSKDEWAELSEWEKVRYKNVKRNYEAMLAI	1/1:110:147	1.1e-24	QFKDIAHHFSKDEWAELSEWEKVRYKNVKRNYEAMLAI
18	PRDM9 ortho		Hetzeb0000269283	hzeb	Heterodontus zebra	Zebra bullhead shark	Chondrichthyes (cartilaginous fishes)	transcribed RNA sequence (putative PRDM9 ortholog), protein fragment	PQEGMGKTKSDRADTGEGKAMSEKRKSEITDKFKDIAVHFAKDEWAELSEWEKIRYKNVKRNYETMLAIGLDVPKPAFMSRRSRGRQPYVYESSDSDEDWMPKPLVKNPSRKLNVFSLLKY							1/1:30:69	2.6e-08	TDKFKDIAVHFAKDEWAELSEWEKIRYKNVKRNYETMLAI	1/1:32:69	9.3e-27	KFKDIAVHFAKDEWAELSEWEKIRYKNVKRNYETMLAI	1/1:32:69	1.8e-14	KFKDIAVHFAKDEWAELSEWEKIRYKNVKRNYETMLAI	1/1:32:69	9.1e-14	KFKDIAVHFAKDEWAELSEWEKIRYKNVKRNYETMLAI	1/1:32:69	3.1e-24	KFKDIAVHFAKDEWAELSEWEKIRYKNVKRNYETMLAI
19	PRDM9 ortho		XP_020371194	rtyp	Rhincodon typus	whale shark	Chondrichthyes (cartilaginous fishes)	histone-lysine N-methyltransferase PRDM9-like (LOC109915932)	MILYFQIKDQFKDIAVHFSKDEWAELSEWEKTRYKNVKRNYEAMLAIGLNVPKPAFMSRHGRGSQSCVYESSDSDEDWTPKCLVKNPPQVRTFKPPFKNDGIKKTKKENSKKIEKVQLAIASHLQEDKDSGYRSFNEDAASAMEETVSVKKINRETAMSECEAQQESIKVVCTGKMLESSTEETCNKKEERRYSLRNKERKVYTEERELCDEDFLFCEDCETFFVEECPVHGPPVFIKDTVVEFNRPERARLTLPEGLNIAISKIRKAGLGVWNEGKIIPKGVHFGPYEGVTSNEESAAVSGYSWVISKGKQDFEYIDAKDESKSNWMRFVNCARKEEEQNLVAFQHHGKIYYRTCKPVPPRCELLVWYGDEYAKELGIKWTAMWTMKQNPKAGEDDEC…							1/1:8:47	1.2e-09	KDQFKDIAVHFSKDEWAELSEWEKTRYKNVKRNYEAMLAI	1/1:10:47	7.8e-29	QFKDIAVHFSKDEWAELSEWEKTRYKNVKRNYEAMLAI	1/1:10:47	1.4e-14	QFKDIAVHFSKDEWAELSEWEKTRYKNVKRNYEAMLAI	1/1:10:47	5.3e-14	QFKDIAVHFSKDEWAELSEWEKTRYKNVKRNYEAMLAI	1/1:10:47	4.4e-25	QFKDIAVHFSKDEWAELSEWEKTRYKNVKRNYEAMLAI
20	PRDM9 ortho	-	A0A3R7PT49	pvan	Penaeus vannamei	Whiteleg shrimp	Crustacea	Putative histone-lysine N-methyltransferase PRDM7	MVLPKCFTGSWDFLHHRPIHISSPKSLKQLRRTFRTGPQVPEFVVRQQRRRRNGLVAPTARPPRVPDDEGDDEWTPEKERSSRYAIKSGSVGGGRRGGLKRKAEWSAPAWTGRSENYDDAPLSVDQVDVIPLWTPAKLVEIMPTTADRSSGDSAAENVKPEDKGSFQFPCHSSTDTEMVTVKELPAESETLGVGSDEEGRGNSCFSGEKSKTRYPRRRSRRKLFYEESITKDDDFIYCADCEEEKEGECPYHPLFLILDNPVVRDGSEKDRARLTTPWPLTVCDSKVKGAGKGVWTNAHLPAHLVFGPYEGRVLSGHPEAGKESGYGWKIRGTGTRNTCIDAVDSAVSNWMRYVNCSRTEAETNLSTFQYKGQIYYKTDSAISRGSELMCWYGDDYGKD…					PF00856 [SET]		1/1:572:611	0.0019	RAMAEDAKQLFSTEEWLSFPEIEKNRFENILRNYKAMKDF	1/1:574:611	4.1e-15	MAEDAKQLFSTEEWLSFPEIEKNRFENILRNYKAMKDF	1/1:574:611	3.2e-06	MAEDAKQLFSTEEWLSFPEIEKNRFENILRNYKAMKDF	1/1:574:611	8.6e-05	MAEDAKQLFSTEEWLSFPEIEKNRFENILRNYKAMKDF	1/1:574:611	1.1e-10	MAEDAKQLFSTEEWLSFPEIEKNRFENILRNYKAMKDF
21	PRDM9 ortho		AEFG01039144.1	pmar	Petromyzon marinus	sea lamprey	Cyclostomata (jawless fishes)	animal number 11 contig_39143, whole genome shotgun sequence (possible PRDM9 ortholog)	PSSASRPLRVSAPQQQEMGDFRDIRGFFTKAEWGDLAECEKRRYRNIKQNHAVMLNLGGYGRPEPLHN							1/1:18:57	2.6e-05	MGDFRDIRGFFTKAEWGDLAECEKRRYRNIKQNHAVMLNL	1/1:20:57	5e-23	DFRDIRGFFTKAEWGDLAECEKRRYRNIKQNHAVMLNL	1/1:20:57	1.1e-09	DFRDIRGFFTKAEWGDLAECEKRRYRNIKQNHAVMLNL	1/1:20:57	5.8e-10	DFRDIRGFFTKAEWGDLAECEKRRYRNIKQNHAVMLNL	1/1:20:57	9.1e-19	DFRDIRGFFTKAEWGDLAECEKRRYRNIKQNHAVMLNL
22	PRDM9 ortho		A0A2G8K9S3	sjap	Stichopus japonicus	Sea cucumber	Echinozoa	KRAB-related domain-containing protein	MIMSMSSKEDKEYGDLRQFFTAQGWAELSSYEKLRLQNMKRNYEMMVQIGLTVSMPEFMTQKRRQTRKRSRDDSDDDINDDDWRPTKKVVIKPGRRSKSKLQLSTNQTVCNNQPQLSFVLIDNS							1/1:10:49	0.0018	DKEYGDLRQFFTAQGWAELSSYEKLRLQNMKRNYEMMVQI	1/1:12:49	4.3e-22	EYGDLRQFFTAQGWAELSSYEKLRLQNMKRNYEMMVQI	1/1:12:49	5.3e-09	EYGDLRQFFTAQGWAELSSYEKLRLQNMKRNYEMMVQI	1/1:12:49	6.2e-08	EYGDLRQFFTAQGWAELSSYEKLRLQNMKRNYEMMVQI	1/1:12:49	1.1e-15	EYGDLRQFFTAQGWAELSSYEKLRLQNMKRNYEMMVQI
23	PRDM9 ortho	-	W4YDS2	spur	Strongylocentrotus purpuratus	Purple sea urchin	Echinozoa	Uncharacterized protein	MPLPATDDYSAVQAYFTAKEWAEISDYEKLRLKNIKENYEMMIEVGLKVSPPDFMRPRRGRKKQLVEESDSEDEEWKPKRAKKKSRGSFSAPFRAPAVKSNKPVITKKQPEPKPHTVTSGTVYDDDGNPLNDAHHIGGERIIDLLEWKDYADSTQPQTNPIASSGDQGNQSGDPNTRSDDQKTEQTLAEVATGGDHSPKQSRSFCMKVGGKAKSLSDRRKEKPQSSPRQYRYPRRAVSRKSYKEDDVPDDDHYIYCEDCHEVFEGQCSKHPLTIIKDNPVPKGSKNRARKTLPDGLAVKQSLIPGAGQGIFATKFIPKGYRFGPYDGDIVDLETGYDSGYAWEICTEGKPHHYVDSNSEQTGNWMRYINCARNEGEQNLVAFQYLGEIYYRTFKPIWPG…					PF00856 [SET]	PF00096 [ZnF_C2H2]	1/1:6:45	0.00049	TDDYSAVQAYFTAKEWAEISDYEKLRLKNIKENYEMMIEV	1/1:8:45	7.9e-21	DYSAVQAYFTAKEWAEISDYEKLRLKNIKENYEMMIEV	1/1:8:45	8.1e-08	DYSAVQAYFTAKEWAEISDYEKLRLKNIKENYEMMIEV	1/1:8:45	4.7e-10	DYSAVQAYFTAKEWAEISDYEKLRLKNIKENYEMMIEV	1/1:8:45	5.4e-16	DYSAVQAYFTAKEWAEISDYEKLRLKNIKENYEMMIEV
24	PRDM9 ortho		XP_794235	spur	Strongylocentrotus purpuratus	Purple sea urchin	Echinozoa	PREDICTED: histone-lysine N-methyltransferase PRDM9-like [Strongylocentrotus purpuratus]	MPLPATDDYSAVQAYFTAKEWAEISDYEKLRLKNIKENYGMMIEKEKAKEKLSLELNVQFKNIMYRLKVSPPDFMRPRRGRKKQLVEESDSEDEEWKPKRAKKKSRGSFSVPFKAPAVKSNKPVTKKQPEPKPHTVTSGTVYDDDGNPLNDAHHIGGERIIDLLEWKDFDESTQPQTNPTASSGDQGTQSCDPITQLGDQKTEQTLTGVATGGDQTPKQSRSFCMKVGGKAKSLSDRRKEKPQPSPRQSRYPRRAVSRKSYKEDDVPDDDHYIYCEDCHEVFEGQCSKHPLTIIKDNPVPKGSKDRARKTLPDGLGVKQSSIPGAGQGIFATKFIPKGYRFGPYDGDIVDLETGYDSGYAWEHTVTGTVYDDDGNPLNDAHHIGGERIIDLLEWKDYDD…							1/1:6:45	0.0029	TDDYSAVQAYFTAKEWAEISDYEKLRLKNIKENYGMMIEK	1/1:8:45	2.6e-19	DYSAVQAYFTAKEWAEISDYEKLRLKNIKENYGMMIEK	1/1:8:45	1.8e-06	DYSAVQAYFTAKEWAEISDYEKLRLKNIKENYGMMIEK	1/1:8:45	2.3e-09	DYSAVQAYFTAKEWAEISDYEKLRLKNIKENYGMMIEK	1/1:8:45	1.3e-14	DYSAVQAYFTAKEWAEISDYEKLRLKNIKENYGMMIEK
25	PRDM9 ortho		XP_030849319	spur	Strongylocentrotus purpuratus	Purple sea urchin	Echinozoa	histone-lysine N-methyltransferase PRDM9-like	MPLPATDDYSAVQAYFTAKEWAETSDYEKLRLKNIKENYEMMIEVGLQVSPPAFMQPRRGRKKQIVEESDSGDEEWKPKRAKKKSRGSFQAPFKVQQKAPKPVHAKKQQSSEESSKPHTVTSGTVYDDDGNPLDDAHHIGGERIIDLLEWKDFDESTQAQTDTTSSGDQGKQSGDPNTQSGDPNTQSGDQKTEQTLTGVASSGGDQSPKQSQSFCMKVGGCVGGKAKSLSVRRKEKPQPSPRQSRYPRRAVSRKSYKEDDVPDDDHYIYCEDCHEVFEGECSKHPLTIIKDNPVPKGSKDRASKTLPDGLVVKQSSIPGAGQGIFATKFIPKGYRFGPYDGDIVDLETGYDSGYAWEICTEGKPHHYMLTVTVSRQATGCDTSTVHAMKVNKTL							1/1:6:45	0.0012	TDDYSAVQAYFTAKEWAETSDYEKLRLKNIKENYEMMIEV	1/1:8:45	1.3e-20	DYSAVQAYFTAKEWAETSDYEKLRLKNIKENYEMMIEV	1/1:8:45	3.7e-07	DYSAVQAYFTAKEWAETSDYEKLRLKNIKENYEMMIEV	1/1:8:45	1.5e-09	DYSAVQAYFTAKEWAETSDYEKLRLKNIKENYEMMIEV	1/1:8:45	1.4e-15	DYSAVQAYFTAKEWAETSDYEKLRLKNIKENYEMMIEV
26	PRDM9 ortho		W4YZT6	spur	Strongylocentrotus purpuratus	Purple sea urchin	Echinozoa	KRAB-related domain-containing protein	MPLPANDDYSAVQAYFTAKEWAETSDYEKLRLKNIKENYEMLLEVGIQVSPSEFMRPRHGRKKQIVEESDSEDEECKQKKAKKRSRGLMIFPHVLYKNH							1/1:6:45	0.0011	NDDYSAVQAYFTAKEWAETSDYEKLRLKNIKENYEMLLEV	1/1:8:45	4.1e-20	DYSAVQAYFTAKEWAETSDYEKLRLKNIKENYEMLLEV	1/1:8:45	3e-06	DYSAVQAYFTAKEWAETSDYEKLRLKNIKENYEMLLEV	1/1:8:45	4.8e-09	DYSAVQAYFTAKEWAETSDYEKLRLKNIKENYEMLLEV	1/1:8:45	1.3e-14	DYSAVQAYFTAKEWAETSDYEKLRLKNIKENYEMLLEV
27	PRDM9 ortho		W4YX17	spur	Strongylocentrotus purpuratus	Purple sea urchin	Echinozoa	KRAB-related domain-containing protein	MPLPATDDYSAVQAYFTAKEWEETSDYEKLRLKNIKENYEMMIEVGLQVSPPAFMQPRRGRKKQIVEESDSGDEEWKPKRAKKKSRGSFQAPFKVQQKAPKPVHAKKQQSSKESSKPHTVTSGTVYDDDGNPLDDAHHIGGERIIDLLEWKDFDESTQAQTDTSSSGDQGNLSGDPNTQSGDQKTEQTLTGLASSGGDQSPKQSQTFCMKVGGRVGGKAKSLSVRRKEKPQPSPRQSRYPRRAVSRKSYKEDDVPDDDHYICTVYDDDGNPLDDAHHIGGERIIDLLEWKDFDESTQAQTDTTSSGDQGKQSGDPNTQSGDPNTQSGDQKTEQTLTGVASSGGDQSPKQSQSFCMKVGGCVGGKAKSLSAHISI							1/1:6:45	0.00097	TDDYSAVQAYFTAKEWEETSDYEKLRLKNIKENYEMMIEV	1/1:8:45	7.1e-20	DYSAVQAYFTAKEWEETSDYEKLRLKNIKENYEMMIEV	1/1:8:45	2.6e-07	DYSAVQAYFTAKEWEETSDYEKLRLKNIKENYEMMIEV	1/1:8:45	1.2e-09	DYSAVQAYFTAKEWEETSDYEKLRLKNIKENYEMMIEV	1/1:8:45	2.6e-15	DYSAVQAYFTAKEWEETSDYEKLRLKNIKENYEMMIEV
28	PRDM9 ortho	-	A0A1B6DNZ1	cari	Clastoptera arizonana	Arizona spittle bug	Insecta	Uncharacterized protein	MNNSMDDLKLYFSSEDWRSMSDYEKQSCLNIMENYNNLVNLGFKAAKPYFMLTNSKIQNKSSKTTENINILNYPSTSTGNRKSCNLKINIGSNNRKRPKEVNLKSNDLKFETQISIKRKEEEIKVNNYVRQSLLEELAKTGNKKFFQTKPSQSQIEIRNPSKRLQKSGNKLFTEVEQRRAVTAYNLLDTAIKLIELYNNKGINVLKKLKKLVEIEKTTSKNKEATTGSEEKYTTIEEHHTSNSTNNDCTFSKVGVKSFTSRNNQSNSRRYPKRNVPVKDYKEEETLDDDQYIFCDDCGVEYSGDCPEHGPFIHLTDVKVLKNKSDLDRAIKTTPPQLQVDESEIRNGGKGVWTKCAFPSRVLFGPYDGTKCLLPDKTGYSWRIMKNKRVSHFISGKCTG…						PF00096 [ZnF_C2H2]	1/1:2:41	4.3e-06	NNSMDDLKLYFSSEDWRSMSDYEKQSCLNIMENYNNLVNL	1/1:4:41	8.8e-17	SMDDLKLYFSSEDWRSMSDYEKQSCLNIMENYNNLVNL	1/1:4:41	2e-08	SMDDLKLYFSSEDWRSMSDYEKQSCLNIMENYNNLVNL	1/1:4:41	2e-08	SMDDLKLYFSSEDWRSMSDYEKQSCLNIMENYNNLVNL	1/1:4:41	3e-13	SMDDLKLYFSSEDWRSMSDYEKQSCLNIMENYNNLVNL
29	PRDM9 ortho		XP_026931608	ajub	Acinonyx jubatus	cheetah	Mammalia	probable histone-lysine N-methyltransferase PRDM7	MEPLPASESERGQPGGPSTTSPLRFPEQSTERSSRKARWKPTAKDAFKDISIYFSKEEWTEMGDWEKIRYRNVKRNYEVLMTIGLRAPRPAFMCHRRQAIKPQVDDTEDSDEEWTPRQQVKPSWVASRVDQNKQHKGTHRVPLSKESSLKEFSETAKLLNTSGSEQGQKPVSLPGEASTSGHHSRRKLELRRKEIGVKMYSLRERKGFAYQEVSEPQDDDYLYCEKCQNFFIDSCAVHGPPTFVKDNAVGKGHPNRSALTLPPGLRIRPSSIPEAGLGVWNEASDLPLGTHFGPYEGQITEDEEAANSGYSWLITKGRNCYEYVDGKDNSWANWMRYVNCARDDEEQNLVAFQYHRQIFYRTCRVIRPGCELLVWYGDEYGQELGIKWGSKWKSELSTG…							1/1:44:83	4.6e-09	KDAFKDISIYFSKEEWTEMGDWEKIRYRNVKRNYEVLMTI	1/1:46:83	1e-30	AFKDISIYFSKEEWTEMGDWEKIRYRNVKRNYEVLMTI	1/1:46:83	1.7e-15	AFKDISIYFSKEEWTEMGDWEKIRYRNVKRNYEVLMTI	1/1:46:83	2.2e-14	AFKDISIYFSKEEWTEMGDWEKIRYRNVKRNYEVLMTI	1/1:46:83	1.3e-26	AFKDISIYFSKEEWTEMGDWEKIRYRNVKRNYEVLMTI
30	PRDM9 ortho	PRDM7	G1L3S5	amel	Ailuropoda melanoleuca	giant panda	Mammalia	PR/SET domain 7	MSLNTSPEETPERDSGRTGWKPTAKDAFKDISIYFSKEEWTEMGDWEKIRYRNVKRNYEALITIGLRAPRPAFMCHRRQAIKPQVDDTEDSDEEWTPRRQVRPSWVAFRMEQSKHQRGIPRAPLRNESSLKELSETAKLLNTSGSELGQKPVSLPGEASTSGHDSLQKLGFRRKDVEVKMYSLRERKSLAYQEVSEPQDDDYLYCEKCQNFFIDSCAVHGPPTFVKDSAVDKGQPNRSALTLPPGLRIRPSGIPQAGLGVWNEASDLPLGLHFGPYEGQITEDEEAANSGYSWLITKGRNCYEYVDGKDNSWANWMRYVNCARDEEEQNLVAFQYHRQIFYRTCRVIRPGCELLVWYGDEYGQELGIKWGRDKAYNTGSCVNIYLTKNFLFQENQSQRS…			PF01352 [KRAB]	PF09514 [SSXRD]	PF00856 [SET]		1/1:25:64	4e-09	KDAFKDISIYFSKEEWTEMGDWEKIRYRNVKRNYEALITI	1/1:27:64	4.9e-32	AFKDISIYFSKEEWTEMGDWEKIRYRNVKRNYEALITI	1/1:27:64	1.1e-15	AFKDISIYFSKEEWTEMGDWEKIRYRNVKRNYEALITI	1/1:27:64	1.2e-14	AFKDISIYFSKEEWTEMGDWEKIRYRNVKRNYEALITI	1/1:27:64	1.1e-27	AFKDISIYFSKEEWTEMGDWEKIRYRNVKRNYEALITI
31	PRDM9 ortho	PRDM7	A0A452CAD8	bsca	Balaenoptera acutorostrata scammoni	North Pacific minke whale	Mammalia	probable histone-lysine N-methyltransferase PRDM7	MSTDRRPEERAEGDAGRAERTPTAKDAFKDISIYFSKDEWTQMGEWEKVRYRNVKKNYEALIAIGLRAPRPAFMCHRRQATKPQVDDPEDSDEEWTPRQQVKPSWVAFRVEHSKHQKVMPPVPLGNESSLKKLPGAAQPQKARGPVQAQRPAPPPGAASTSARHARQKLERRTKQIEVKMYSLRERKGQVYQEVSEPQDDDYLYCEKCQNFFLDSCAAHGAPTFVKDSAVEKGHPNRSALTLPPGLSIRPSGIPEAGLGVWNEASDLPLGLHFGPYEGQITEDEEAANSGYSWLITKGRNCYEYVDGKDKSWANWMRYVNCARDDEEQNLVAFQYHRQIFYRTCRVVRPGCELLVWYGEEYSQELGIKWGSRWKDELAAGRDPEPKIHPCGSCSLAFSS…			PF01352 [KRAB]	PF09514 [SSXRD]	PF00856 [SET]	PF00096 [ZnF_C2H2]	1/1:25:64	1.6e-09	KDAFKDISIYFSKDEWTQMGEWEKVRYRNVKKNYEALIAI	1/1:27:64	5e-30	AFKDISIYFSKDEWTQMGEWEKVRYRNVKKNYEALIAI	1/1:27:64	2.3e-14	AFKDISIYFSKDEWTQMGEWEKVRYRNVKKNYEALIAI	1/1:27:64	1.6e-14	AFKDISIYFSKDEWTQMGEWEKVRYRNVKKNYEALIAI	1/1:27:64	1.2e-25	AFKDISIYFSKDEWTQMGEWEKVRYRNVKKNYEALIAI
32	PRDM9 ortho		XP_010845707	bbis	Bison bison bison	bison	Mammalia	probable histone-lysine N-methyltransferase PRDM7	MSPNRSPENSTEGDAGRTEWKPKAKDAFKDISIYFTKEEWAEMGEWEKIRYRNVKRNYEALIAIGFRATQPGFMHHGRQVLKSQVDDTEDSDEEWTPRQQGKPSGMAFRGEPSKHPKRLSRGPLNKVSSLKKLPGAAKLLKKSGSKQAQKPVPPPREARTPGKHPRHKVELRRKETEVKRYSVRERKGHVYQEVSEPQDDDYLYCEECQNFFIDSCAAHGPPTFVKDSAVEKGHANRSALTLPPGLSIRPSGIPEAGLGVWNEASDLPLGLHFGPYEGQIIYNEEDSNSGYCWLVTKGRNSYEYVDGKDTSLANWMRYVNCARDDEEQNLVALQYHGQIFYRTCQVVRPGCELLVWYGDEYGEELGIKQDKRGKSKLSAQRDVENKNGMDKWTVKTHLM…							1/1:25:64	1.2e-09	KDAFKDISIYFTKEEWAEMGEWEKIRYRNVKRNYEALIAI	1/1:27:64	5.2e-32	AFKDISIYFTKEEWAEMGEWEKIRYRNVKRNYEALIAI	1/1:27:64	1.4e-15	AFKDISIYFTKEEWAEMGEWEKIRYRNVKRNYEALIAI	1/1:27:64	9e-15	AFKDISIYFTKEEWAEMGEWEKIRYRNVKRNYEALIAI	1/1:27:64	6.3e-28	AFKDISIYFTKEEWAEMGEWEKIRYRNVKRNYEALIAI
33	PRDM9 ortho	PRDM9	A0A2H4J141	bind	Bos indicus	zebu	Mammalia	PR domain-containing 9 protein	MRPYTSPEESTEGDAGRTEWKPTAKDAFKDISVYFSKEEWEEIGEWEKIRYRNVKRNYEALIAIGFRATRPAFMHHRRQVIKLQADDTEDSDEEWTPRQQGKLSSMAFRVEHNKHQNTMSRAPLSKESSLKELPGAAKLLKTSGSKQAQKLVPPPRKARTPGQHPRQKVELRRKETGVKRYSLRERKGHVYQEVSEPQDDDYLYCEECRDFFIDSCAAHGPPIFVKDCAVEKGHANRSALTLPPGLSIRESSIPEAGLGVWNEVSDLPLGLHFGPYEGQITDDEEAANSGYSWLITKRRNCYEYVDGKDTSLANWMRYVNCARDDEEQNLVALQYHGQIFYRTCQVVRPGCELLVWYGDEYGQDLGIKRESSRKSELAAPRESKPKIHPCASCSLAFSS…			PF01352 [KRAB]	PF09514 [SSXRD]		PF00096 [ZnF_C2H2]	1/1:25:64	1.7e-09	KDAFKDISVYFSKEEWEEIGEWEKIRYRNVKRNYEALIAI	1/1:27:64	2.3e-30	AFKDISVYFSKEEWEEIGEWEKIRYRNVKRNYEALIAI	1/1:27:64	9.6e-16	AFKDISVYFSKEEWEEIGEWEKIRYRNVKRNYEALIAI	1/1:27:64	2.4e-14	AFKDISVYFSKEEWEEIGEWEKIRYRNVKRNYEALIAI	1/1:27:64	2.2e-26	AFKDISVYFSKEEWEEIGEWEKIRYRNVKRNYEALIAI
34	PRDM9 ortho	PRDM7	XP_027391242	bixbt	Bos indicus x Bos taurus	hybrid cattle	Mammalia	probable histone-lysine N-methyltransferase PRDM7	MAMSQNRSPEERTKGDAGRTEWKLTAKDAFKDISIYFSKEEWAEMGEWEKTGYRNVKRNYEVLIAIGLRATQPAFMHHRRQVIKPQGDDTEDSDEEWTPQHQGKPSRKAFRMEHRKHQKGKSRGPLSKVSSLKKLQGAAKLLNTSGSKWAQKPANPPRETRTLEQHSRQKVELRRKETDMKRYSLRERKGHVYQEVSEPQDDDYLYCQECQNFFIDSCDAHGPPTFVKDSAVEKGHANRSVLTLPPGLSIKLSGIPEAGLGVWNEASHLPLGLHFGPYEGQITDDKEAINSGYSWLITKGRNSYEYVDGKDTSLANWMRYVNCARHYEEQNLVAFQYHGQIFYRTCQVVRPGCELLVWYGDEYGEKLGIKCESRGKSMFTIPAFLGTTISAMSVIIYSI…							1/1:27:66	9.2e-10	KDAFKDISIYFSKEEWAEMGEWEKTGYRNVKRNYEVLIAI	1/1:29:66	9.7e-31	AFKDISIYFSKEEWAEMGEWEKTGYRNVKRNYEVLIAI	1/1:29:66	1.6e-15	AFKDISIYFSKEEWAEMGEWEKTGYRNVKRNYEVLIAI	1/1:29:66	3.5e-15	AFKDISIYFSKEEWAEMGEWEKTGYRNVKRNYEVLIAI	1/1:29:66	1.8e-26	AFKDISIYFSKEEWAEMGEWEKTGYRNVKRNYEVLIAI
35	PRDM9 ortho	PRDM9	XP_027391647	bixbt	Bos indicus x Bos taurus	hybrid cattle	Mammalia	histone-lysine N-methyltransferase PRDM9-like	MSPNRSPENSTEGDAGRTEWKPMVRDAFKDISIYFTKEEWAEMGEWEKIQYRNVKRNYEALIAIGFRATQPGFMHHGRQVLKSQVDDTEDSDEEWTPRQQGKPSGMAFRGEPSKHPKRLSRGPLNKVSSLKKLPGAAKLLKKSGSKQAQKPVPPPREARTPGKHPRHKVELRRKETEVKRYSVRERKGHVYQEVSEPQDDDYLYCEECQNFFIDSCAAHGPPTFVKDSAVEKGHANRSALTLPPGLSIRPSGIPEAGLGVWNEASDLPLGLHFGPYEGQIIYNEEDSNSGYCWLVTKGRNSYEYVDGKDTSLANWMRYVNCARDDEEQNLVALQYHGQIFYRTCRVVRPGCELLVWYGDEYGEELGIKQDKRGKSKLSAQREPKPKIYPCASCCLSFSS…							1/1:25:64	7.4e-10	RDAFKDISIYFTKEEWAEMGEWEKIQYRNVKRNYEALIAI	1/1:27:64	3.2e-31	AFKDISIYFTKEEWAEMGEWEKIQYRNVKRNYEALIAI	1/1:27:64	1.1e-15	AFKDISIYFTKEEWAEMGEWEKIQYRNVKRNYEALIAI	1/1:27:64	1e-14	AFKDISIYFTKEEWAEMGEWEKIQYRNVKRNYEALIAI	1/1:27:64	5.8e-27	AFKDISIYFTKEEWAEMGEWEKIQYRNVKRNYEALIAI
36	PRDM9 ortho	LOC113887319	A0A4W2FHX6	bixbt	Bos indicus x Bos taurus	hybrid cattle	Mammalia	Uncharacterized protein	MSPNRSPENSTEGDAGRTEWKPKAKDAFKDISIYFTKEEWAEMGEWEKIRYRNVKRNYEALIAIGFRATQPGFMHHRRQVLKPQVDDTEDSDEEWTPRQQGKPSGMAFRGERSKHQKRLSRGPLNKVSSLKKLPGAAKLLKKSGSKQAQKPVPPPREARTPGKHPRHKVELRRKETKVKRYSVRERKGHVYQEVSEPQDDDYLYCEECQNFFIDSCAAHGPPTFVKDSAVEKGHANRSALTLPPGLSIRPSGIPEAGLGVWNEASDLPLGLHFGPYEGQIIYNEEDSHSGYCWLVTKGRNSYEYVDGKDTSLANWMRYVNCARDDEEQNLVALQYHGQIFYRTCRVVRPGCELLVWYGDEYGEELGIKQDKRGKSKLSAQREPKPKIYPCASCCLSFSS…			PF01352 [KRAB]	PF09514 [SSXRD]		PF00096 [ZnF_C2H2]	1/1:25:64	1.2e-09	KDAFKDISIYFTKEEWAEMGEWEKIRYRNVKRNYEALIAI	1/1:27:64	5.2e-32	AFKDISIYFTKEEWAEMGEWEKIRYRNVKRNYEALIAI	1/1:27:64	1.4e-15	AFKDISIYFTKEEWAEMGEWEKIRYRNVKRNYEALIAI	1/1:27:64	9e-15	AFKDISIYFTKEEWAEMGEWEKIRYRNVKRNYEALIAI	1/1:27:64	6.3e-28	AFKDISIYFTKEEWAEMGEWEKIRYRNVKRNYEALIAI
37	PRDM9 ortho		XP_014333498	bmut	Bos mutus	Yak	Mammalia	PREDICTED: probable histone-lysine N-methyltransferase PRDM7	MASKAPEVRRQIWDRFSTSIMRTNRRDPHIKAQGAQRVDEHMLHFLTSRSQRNWGPGKGGVASVPIGWTASLAAPIGRLCLEPYKTAAPPSFCLSAGGLTAKLLSRYGPGSEVPQNSEETERNARCATFAKDAFKDISIYFSKEEWAEMGEWEKIQYRNVKRNYEVLIAIGLRATQPAFMHHRRQVIKPQGDDTEDSDEEWTPQHQGKPSRKAFRMEHRKHQKGKSRGPLSKVSSLKKLQGAAKLLNTSGSKWAQKPANPPRETRTLEQHSRQKVELRRKETDMKRYSLRERKGHVYQEVSEPQDDDYLYCQECQNFFIDSCDAHGPPTFVKDSAVEKGHANRSVLTLPPGLSIKLSGIPEAGLGVWNEASHLPLGLHFGPYEGQITDDKEAINSGYSW…							1/1:131:170	1.2e-09	KDAFKDISIYFSKEEWAEMGEWEKIQYRNVKRNYEVLIAI	1/1:133:170	2.6e-31	AFKDISIYFSKEEWAEMGEWEKIQYRNVKRNYEVLIAI	1/1:133:170	3.1e-16	AFKDISIYFSKEEWAEMGEWEKIQYRNVKRNYEVLIAI	1/1:133:170	1.4e-14	AFKDISIYFSKEEWAEMGEWEKIQYRNVKRNYEVLIAI	1/1:133:170	5.9e-27	AFKDISIYFSKEEWAEMGEWEKIQYRNVKRNYEVLIAI
38	PRDM9 ortho		XP_005898414	bmut	Bos mutus	Yak	Mammalia	PREDICTED: histone-lysine N-methyltransferase PRDM9-like [Bos mutus]	MRPNTSPEGSTEGDAGRTEWKPTAKDAFKDISVYFSKEEWEEMGEWEKIRYRNVKRNYEALIAIGFRATRPAFMHHRRQVIKLQADDTEDSDEEWTPRQQGKLSSMAFRVEHNKHQNTMSREPLSKEFSLKELPGAAKLLKTSGSKQAQKLVPPPGKARTPGQHPRQKVELRRKETGVKRYSLRERKGHVYQEVSEPQDDDYLYCEECQNFFIDSCAAHGPPIFVKDCAVEKGHANRSALTLPPGLSIRESSIPEAGLGVWNEVSDLPLGLHFGPYEGQITDDEEAANSGYSWLITKRRNCYEYVDGKDTSLANWMRYVNCARDDEEQNLVALQYHGQIFYRTCQVVRPGCELLVWYGDEYGQDLGIKRESSRKSELAAPRESKPKIHPCASCSLAFSS…							1/1:25:64	5.3e-10	KDAFKDISVYFSKEEWEEMGEWEKIRYRNVKRNYEALIAI	1/1:27:64	2.4e-31	AFKDISVYFSKEEWEEMGEWEKIRYRNVKRNYEALIAI	1/1:27:64	1.4e-16	AFKDISVYFSKEEWEEMGEWEKIRYRNVKRNYEALIAI	1/1:27:64	1.8e-14	AFKDISVYFSKEEWEEMGEWEKIRYRNVKRNYEALIAI	1/1:27:64	1.2e-27	AFKDISVYFSKEEWEEMGEWEKIRYRNVKRNYEALIAI
39	PRDM9 ortho	PRDM9	X5EUT8	bmutg	Bos mutus grunniens	Wild yak	Mammalia	PRDM9	MRPNTSPEESTEGDAGRTEWKPTAKDAFKDISVYFSKEEWEEMGEWEKIRYRNVKRNYEALIAIGFRATRPAFMHHRRQVIKLQADDTEDSDEEWTPRQQGKLSSMAFRVEHNKHQNTMSREPLSKEFSLKELPGAAKLLKTSGSKQAQKLVPPPGKARTPGQHPRQKVELRRKETGVKRYSLRERKGHVYQEVSEPQDDDYLYCEECQNFFIDSCAAHGPPIFVKDCAVEKGHANRSALTLPPGLSIRESSIPEAGLGVWNEVSDLPLGLHFGPYEGQITDDEEAANSGYSWLITKRRNCYEYVDGKDTSLANWMRYVNCARDDEEQNLVALQYHGQIFYRTCQVVRPGCELLVWYGDEYGQDLGIKRESSRKSELAAPRESKPKIHPCASCSLAFSS…			PF01352 [KRAB]	PF09514 [SSXRD]		PF00096 [ZnF_C2H2]	1/1:25:64	5.3e-10	KDAFKDISVYFSKEEWEEMGEWEKIRYRNVKRNYEALIAI	1/1:27:64	2.4e-31	AFKDISVYFSKEEWEEMGEWEKIRYRNVKRNYEALIAI	1/1:27:64	1.4e-16	AFKDISVYFSKEEWEEMGEWEKIRYRNVKRNYEALIAI	1/1:27:64	1.8e-14	AFKDISVYFSKEEWEEMGEWEKIRYRNVKRNYEALIAI	1/1:27:64	1.2e-27	AFKDISVYFSKEEWEEMGEWEKIRYRNVKRNYEALIAI
40	PRDM9 ortho		XP_015317022	btau	Bos taurus	domestic Cow	Mammalia	probable histone-lysine N-methyltransferase PRDM7	MSQNRSPEERTKGDAGRTEWKLTAKDAFKDISIYFSKEEWAEMGEWEKTGYRNVKRNYEVLIAIGLRATQPAFMHHRRQVIKPQGDDTEDSDEEWTPQHQGKPSRKAFRMEHRKHQKGKSRGPLSKVSSLKKLQGAAKLLNTSGSKWAQKPANPPRETRTLEQHSRQKVELRRKETDMKRYSLRERKGHVYQEVSEPQDDDYLYCQECQNFFIDSCDAHGPPTFVKDSAVEKGHANRSVLTLPPGLSIKLSGIPEAGLGVWNEASHLPLGLHFGPYEGQITDDKEAINSGYSWLITKGRNSYEYVDGKDTSLANWMRYVNCARHYEEQNLVAFQYHGQIFYRTCQVVRPGCELLVWYGDEYGEKLGIKCESRGKSMFAAGGVEGHPSSSTPPHSGELPR…							1/1:25:64	9.2e-10	KDAFKDISIYFSKEEWAEMGEWEKTGYRNVKRNYEVLIAI	1/1:27:64	9.7e-31	AFKDISIYFSKEEWAEMGEWEKTGYRNVKRNYEVLIAI	1/1:27:64	1.6e-15	AFKDISIYFSKEEWAEMGEWEKTGYRNVKRNYEVLIAI	1/1:27:64	3.5e-15	AFKDISIYFSKEEWAEMGEWEKTGYRNVKRNYEVLIAI	1/1:27:64	1.8e-26	AFKDISIYFSKEEWAEMGEWEKTGYRNVKRNYEVLIAI
41	PRDM9 ortho	LOC100851938	E1BJ96	btau	Bos taurus	domestic Cow	Mammalia	Uncharacterized protein	MSPNRSPENSTEGDAGRTEWKPMVRAKDAFKDISIYFTKEEWAEMGEWEKIQYRNVKRNYEALIAIGFRATQPGFMHHGRQVLKSQVDDTEDSDEEWTPRQQGKPSGMAFRGEPSKHPKRLSRGPLNKVSSLKKLPGAAKLLKKSGSKQAQKPVPPPREARTPGKHPRHKVELRRKETEVKRYSVRERKGHVYQEVSEPQDDDYLYCEECQNFFIDSCAAHGPPTFVKDSAVEKGHANRSALTLPPGLSIRPSGIPEAGLGVWNEASDLPLGLHFGPYEGQIIYNEEDSNSGYCWLVTKGRNSYEYVDGKDTSLANWMRYVNCARDDEEQNLVALQYHGQIFYRTCRVVRPGCELLVWYGDEYGEELGIKQDKRGKSKLSAQREPKPKIYPCASCCLSF…			PF01352 [KRAB]	PF09514 [SSXRD]		PF00096 [ZnF_C2H2]	1/1:27:66	7.4e-10	KDAFKDISIYFTKEEWAEMGEWEKIQYRNVKRNYEALIAI	1/1:29:66	3.2e-31	AFKDISIYFTKEEWAEMGEWEKIQYRNVKRNYEALIAI	1/1:29:66	1.1e-15	AFKDISIYFTKEEWAEMGEWEKIQYRNVKRNYEALIAI	1/1:29:66	1e-14	AFKDISIYFTKEEWAEMGEWEKIQYRNVKRNYEALIAI	1/1:29:66	5.8e-27	AFKDISIYFTKEEWAEMGEWEKIQYRNVKRNYEALIAI
42	PRDM9 ortho	PRDM7	ENSBTAP00000047652	btau	Bos taurus	domestic Cow	Mammalia	PR domain containing 7 (ENSBTAT00000056084 peptide: ENSBTAP00000047652 gene: ENSBTAG00000002158)	MSPNRSPENSTEGDAGRTEWKPKAKDAFKDISIYFTKEEWAEMGEWEKIRYRNVKRNYEALIAIGFRATQPGFMHHRRQVLKPQVDDTEDSDEEWTPRQQGKPSGMAFRGERSKHQKRLSRGPLNKVSSLKKLPGAAKLLKKSGSKQAQKPVPPPREARTPGKHPRHKVELRRKETKVKRYSVRERKGHVYQEVSEPQDDDYLCEPWYNNLTSPFGPPIIPFLYDLGCAAHGPPTFVKDSAVEKGHANRSALTLPPGLSIRPSGIPEAGLGVWNEASDLPLGLHFGPYEGQIIYNEEDSHSGYCWLVTKGRNSYEYVDGKDTSLANWMRYVNCARDDEEQNLVALQYHGQIFYRTCRVVRPGCELLVWYGDEYGEELGIKQDKRGKSKLSAQREPKPKI…			PF01352 [KRAB]	PF09514 [SSXRD]		PF00096 [ZnF_C2H2]	1/1:25:64	1.2e-09	KDAFKDISIYFTKEEWAEMGEWEKIRYRNVKRNYEALIAI	1/1:27:64	5.2e-32	AFKDISIYFTKEEWAEMGEWEKIRYRNVKRNYEALIAI	1/1:27:64	1.4e-15	AFKDISIYFTKEEWAEMGEWEKIRYRNVKRNYEALIAI	1/1:27:64	9e-15	AFKDISIYFTKEEWAEMGEWEKIRYRNVKRNYEALIAI	1/1:27:64	6.3e-28	AFKDISIYFTKEEWAEMGEWEKIRYRNVKRNYEALIAI
43	PRDM9 ortho	PRDM9	ENSBTAP00000002795	btau	Bos taurus	domestic Cow	Mammalia	>PRDM9_ENSBTAT00000002795 peptide: ENSBTAP00000002795 gene: ENSBTAG00000004538	TPMAMRPNTSPEESTERDAGRTEWKPTAKDAFKDISVYFSKEEWEEMGEWEKIRYRNVKRNYEALIAIGFRATRPAFMHHRRQVIKLQADDTEDSDEEWTPRQQGKLSSMAFRVEHNKHQNKTMSRAPLSKEFSLKELPGAAKLLKTSGSKQAQKLVPPPGKARTPGQHPRQKVELRRKETEVKRYSLRERKGHVYQEVSEPQDDDYLYCEECQSFFIDSCAAHGPPIFVKDCAVEKGHANRSALTLPPGLSIRESSIPEAGLGVWNEVSDLPLGLHFGPYEGQITDDEEAANSGYSWLITKRRNCYEYVDGKDTSLANWMRYVNCARDDEEQNLVALQYHGQIFYRTCQVVRPGCELLVWYGDEYGQDLGIKRESSRKSELAGPRAESKPKIHPCASC…			PF01352 [KRAB]	PF09514 [SSXRD]		PF00096 [ZnF_C2H2]	1/1:29:68	5.3e-10	KDAFKDISVYFSKEEWEEMGEWEKIRYRNVKRNYEALIAI	1/1:31:68	2.4e-31	AFKDISVYFSKEEWEEMGEWEKIRYRNVKRNYEALIAI	1/1:31:68	1.4e-16	AFKDISVYFSKEEWEEMGEWEKIRYRNVKRNYEALIAI	1/1:31:68	1.8e-14	AFKDISVYFSKEEWEEMGEWEKIRYRNVKRNYEALIAI	1/1:31:68	1.2e-27	AFKDISVYFSKEEWEEMGEWEKIRYRNVKRNYEALIAI
44	PRDM9 ortho	PRDM9	A0A2H4IWM3	bbub	Bubalus bubalis	Domestic water buffalo	Mammalia	PR domain-containing 9 protein	MRPNRSPEESTEGDAGRTEWKPKAKDAFKDISVYFSKEEWEEMEEWEKIRYRNVKRNYEALIAIGFRATRPAFMHHRRQVIKLQVDDTEDSDEEWAPRQQGKLSSMAFRVEHNKHQNAMSRAPLSKESSLKELQGAAKLLKTSGSKQAQKPVSPPRKAWTPGQHPRQKVELRRKETGVKRYSLRERKGDVYQEVGEPQDADYLYCEECQNFFIDSCAAHGPPTFVKDCAAERGHTNRSALTLPPGLSIRESSIPEAGLGVWNEVSDQPLGLHFGPYEGQITDDEEAANSGYSWLITKGRNCYEYVDGKDTSLANWMRYVNCARDDEEQNLVALQYHGQIFYRTCQVVRPGCELQVWYGDEYGQDLGIKRESSRKSKLAAPREPKPKIHPCASCSLAFSS…			PF01352 [KRAB]	PF09514 [SSXRD]		PF00096 [ZnF_C2H2]	1/1:25:64	2.4e-10	KDAFKDISVYFSKEEWEEMEEWEKIRYRNVKRNYEALIAI	1/1:27:64	7e-30	AFKDISVYFSKEEWEEMEEWEKIRYRNVKRNYEALIAI	1/1:27:64	2.6e-16	AFKDISVYFSKEEWEEMEEWEKIRYRNVKRNYEALIAI	1/1:27:64	1.6e-14	AFKDISVYFSKEEWEEMEEWEKIRYRNVKRNYEALIAI	1/1:27:64	2.5e-26	AFKDISVYFSKEEWEEMEEWEKIRYRNVKRNYEALIAI
45	PRDM9 ortho	PRDM7	XP_025716183	curs	Callorhinus ursinus	northern fur seal	Mammalia	probable histone-lysine N-methyltransferase PRDM7	MSLNRSPEETPERDSGRAGWKPTVRDAFKDISTYFSKEEWTEMGDWEKIRYRNVKRNYEALITIGLRAPRPAFMCHRRQAIKPQVDDTEDSDEEWTPRQQVRPSWVAFRMEQNKHQKGIPRAPLSNESSLKELSETAKLLNTSGSEQGQKPVSPPGEASTSGHHSLQKLELRRKDIEVKMYSLRERKSLAYQEVNEPQDDDYLYCEKCQNFFIDSCAVHGPPTFVKDSAVDKGQPNRSALTLPPGLRIRPSSIPQAGLGVWNEASDLPLGLHFGPYEGQITEDEEAANSGYSWLITKGRNCYEYVDGKDNSWANWMRYVNCARDDEEQNLVAFQYHRQIFYRTCRVIRPGCELLVWYGDEYGQELGIKWGSKWKSELTAGKGDNACNTGSCVNIYLTKN…			PF01352 [KRAB]	PF09514 [SSXRD]	PF00856 [SET]		1/1:25:64	6.9e-08	RDAFKDISTYFSKEEWTEMGDWEKIRYRNVKRNYEALITI	1/1:27:64	1.3e-31	AFKDISTYFSKEEWTEMGDWEKIRYRNVKRNYEALITI	1/1:27:64	2.5e-16	AFKDISTYFSKEEWTEMGDWEKIRYRNVKRNYEALITI	1/1:27:64	1.5e-14	AFKDISTYFSKEEWTEMGDWEKIRYRNVKRNYEALITI	1/1:27:64	1.6e-27	AFKDISTYFSKEEWTEMGDWEKIRYRNVKRNYEALITI
46	PRDM9 ortho		XP_010968273	cbac	Camelus bactrianus	Bactrian camel	Mammalia	probable histone-lysine N-methyltransferase PRDM7	MSPDRSSEESTEGDAGEREWKPTVRDAFKDISIYFSKEEWTEMGEWEKIRYRNVKRNYEALITIGLRAPRPAFMCHRRKAIKPQVDDTEDSDEEWTPRQQVKTSWVDFRAEHSRHKKGMPRGPLSNQSSLKELSGTAKPLKTSGSEQAQKPFPPLGEASTSGRHSRQKLELRRKESQVKTYSLRERKGHAYQEVSEPQDDDYLYCEKCQNFFIDSCAAHGPPTFVKDSAVERGHPNRSALTLPPGLRIGPSGIPEAGLGVWNEASDLPLGLHFGPYEGQITEDEEAANSGYSWLITKGRNCYEYVDGKDKSWANWMRYVNCARDDEEQNLVAFQYHRQIFYRTCRVVRPGCELLVWYGDEYGQELGIKWGSQWKREHTTGQGGHHHSPSRKRRNALLGD…							1/1:25:64	2.5e-09	RDAFKDISIYFSKEEWTEMGEWEKIRYRNVKRNYEALITI	1/1:27:64	1.1e-31	AFKDISIYFSKEEWTEMGEWEKIRYRNVKRNYEALITI	1/1:27:64	8.9e-16	AFKDISIYFSKEEWTEMGEWEKIRYRNVKRNYEALITI	1/1:27:64	3.7e-14	AFKDISIYFSKEEWTEMGEWEKIRYRNVKRNYEALITI	1/1:27:64	5.8e-27	AFKDISIYFSKEEWTEMGEWEKIRYRNVKRNYEALITI
47	PRDM9 ortho		TKS28037	cdro	Camelus dromedarius	dromedary	Mammalia	hypothetical protein Cadr_00024565 (with SSXRD and SET domains)	MSPDRSSEESTEGDAGEREWKPTGKDAFKDISIYFSKEEWTEMGEWEKIRYRNVKRNYEALITIGNRKCWVQMSLGNMKQVFRQKFSFFLGLRAPRPAFMCHRRKAIKPQVDDTEDSDEEWTPRQQELRRKESQVKTYSLRERKGHAYQEVSEPQDDDYLYCEKCQNFFIDSCAAHGPPTFVKDSAVERGHPNRSALTLPPGLRIGPSGIPEAGLGVWNEASDLPLGLHFGPYEGQITEDEEAANSGYSWLITKGRNCYEYVDGKDKSWANWMRYVNCARDDEEQNLVAFQYHRQIFYRTCRVVRPGCELLVWYGDEYGQELGIKWGSQWKREHATGQGGHHHSPSRKRRNALLGDFHGPAPK			PF01352 [KRAB]	PF09514 [SSXRD]	PF00856 [SET]		1/1:25:64	2.5e-09	KDAFKDISIYFSKEEWTEMGEWEKIRYRNVKRNYEALITI	1/1:27:64	1.1e-31	AFKDISIYFSKEEWTEMGEWEKIRYRNVKRNYEALITI	1/1:27:64	8.9e-16	AFKDISIYFSKEEWTEMGEWEKIRYRNVKRNYEALITI	1/1:27:64	3.7e-14	AFKDISIYFSKEEWTEMGEWEKIRYRNVKRNYEALITI	1/1:27:64	5.8e-27	AFKDISIYFSKEEWTEMGEWEKIRYRNVKRNYEALITI
48	PRDM9 ortho		XP_014415623	cfer	Camelus ferus	wild Bactrian camel	Mammalia	PREDICTED: probable histone-lysine N-methyltransferase PRDM7	MSPDRSSEESTEGDAGEREWKPTVRDAFKDISIYFSKEEWTEMGEWEKIRYRNVKRNYEALITIGLRAPRPAFMCHRRKAIKPQVDDTEDSDEEWTPRQQVKTSWVDFRAEHSRHKKGMPRGPLSNQSSLKELSGTAKPLKTSGSEQAQKPFPPLGEASTSGRHSRQKLELRRKESQVKTYSLRERKGHAYQEVSEPQDDDYLYCEKCQNFFIDSCAAHGPPTFVKDSAVERGHPNRSALTLPPGLRIGPSGIPEAGLGVWNEASDLPLGLHFGPYEGQITEDEEAANSGYSWLITKGRNCYEYVDGKDKSWANWMRYVNCARDDEEQNLVAFQYHRQIFYRTCRVVRPGCELLVWYGDEYGQELGIKWGSQWKREHTTGQAEPKIYPCPSYSVAFSSQ…							1/1:25:64	2.5e-09	RDAFKDISIYFSKEEWTEMGEWEKIRYRNVKRNYEALITI	1/1:27:64	1.1e-31	AFKDISIYFSKEEWTEMGEWEKIRYRNVKRNYEALITI	1/1:27:64	8.9e-16	AFKDISIYFSKEEWTEMGEWEKIRYRNVKRNYEALITI	1/1:27:64	3.7e-14	AFKDISIYFSKEEWTEMGEWEKIRYRNVKRNYEALITI	1/1:27:64	5.8e-27	AFKDISIYFSKEEWTEMGEWEKIRYRNVKRNYEALITI
49	PRDM9 ortho	-	A0A452F9X1	chir	Capra hircus	Domestic Goat	Mammalia	Uncharacterized protein	MNPYISPEESTEGDAGRTEWKPMVKDAFKDISIYFSKEECAEMGEWEKICYRNAKRNCEALITIGNRKSFMHHCRQVIKPQVDDIEDSDEEWTPRQQGKPSWMTFRVKHSKHQKVNISQILNKSSLKELPGASKLLKTCGPKQAQIPVPPPREPSTSEQHPRQKLLFSNSELRRKETEVKIYSLRERVRHVYQVSPRMTTSLCCHGLPTFVKDCAEEKGHANHSALSLPPGLSIRPSGIPEAGLGVWNKVSDLLLGLHFGSYVGQITDDEEAAKSGYSWLITKGRNCYEYVDGKERYVNGARDDKEQNLVAFLTHRPGCELLVWYRDKYSQDLSIKCGSRWKSELMATEPKPKIHPCASCSLAFSSQKFLRQHVECNHPSQILLRTSARDRLRTKDSCP…			PF01352 [KRAB]	PF09514 [SSXRD]		PF00096 [ZnF_C2H2]	1/1:25:64	2.7e-06	KDAFKDISIYFSKEECAEMGEWEKICYRNAKRNCEALITI	1/1:27:64	1.2e-27	AFKDISIYFSKEECAEMGEWEKICYRNAKRNCEALITI	1/1:27:64	1.1e-12	AFKDISIYFSKEECAEMGEWEKICYRNAKRNCEALITI	1/1:27:64	1.4e-10	AFKDISIYFSKEECAEMGEWEKICYRNAKRNCEALITI	1/1:27:64	8.5e-23	AFKDISIYFSKEECAEMGEWEKICYRNAKRNCEALITI
50	PRDM9 ortho		XP_017908740	chir	Capra hircus	Domestic Goat	Mammalia	PREDICTED: histone-lysine N-methyltransferase PRDM9 isoform X1	MRPNRSPEESTEGDAGRTEWKPPAKDAFKDISVYFSKEEWEEMGEWEKIRYRNVKRNYEALIAIGFRATRPAFMHHRRQVIKLQVDDTEDSDEEWTPRQQGKPSLMAFRVEHNKHQKAMSRAPLSKESSLKELPGAAKLLKTSGSKQAQKPVPPPRKARIPGQHPRQKVECKRTETGVKRYSLRERKGHVYQEVGEPQDDEYLYCEECQNFFIDSCAAHGPPTFVKDCAVEKGHANRSALTLPPGLSIRLSGIPEAGLGVWNEASDLPLGLHFGPYEGQITDDEEAANSGYSWLITKGRNCYEYVDGKDTSLANWMRYVNCARDDEEQNLVALQYQGQIFYRTCRVVRPGCELLVWYGDEYGQDLGIKRDSSGKSEFAAGREPKPEIHPCASCSLAFSS…			PF01352 [KRAB]	PF09514 [SSXRD]		PF00096 [ZnF_C2H2]	1/1:25:64	5.3e-10	KDAFKDISVYFSKEEWEEMGEWEKIRYRNVKRNYEALIAI	1/1:27:64	2.4e-31	AFKDISVYFSKEEWEEMGEWEKIRYRNVKRNYEALIAI	1/1:27:64	1.4e-16	AFKDISVYFSKEEWEEMGEWEKIRYRNVKRNYEALIAI	1/1:27:64	1.8e-14	AFKDISVYFSKEEWEEMGEWEKIRYRNVKRNYEALIAI	1/1:27:64	1.2e-27	AFKDISVYFSKEEWEEMGEWEKIRYRNVKRNYEALIAI
51	PRDM9 ortho		XP_017899196	chir	Capra hircus	Domestic Goat	Mammalia	PREDICTED: histone-lysine N-methyltransferase PRDM9	MSPNRSPEKSTEGDAGRTEWKPMAKDISIYFTKEEWAEMGEWEKVQYRNVKRNYKALIAIGFRATQPAFMHHCRQVIKPQVDDTEDSEEEWTPRQQGKPSGMAFRGEPSKHQKRLSRGPLNKVSSLKKLPGAAKLLKKTGSKQAQKPVPPPREARTPGQHPRHKVELRRKETEVKRYSLRERKGHVYQEVSELQDDDYLYCEECQNFFIDSCAAHGPPTFVKDSAVEKGHANRSALTLPPGLSIRPSGIPEAGLGVWNEASDLPLGLHFGPYEGQIIYNEEASHSGYSWLVTKGRNSYEYVDGKDTSLANWMRYVNCARDDEEQNLVALQYHGQIFYRTCQVVRPGCELLVWYGDEYGEELGIKQDSRGKSKLSAQREPKPKIHPCASCSLSFSSQKFL…			PF01352 [KRAB]	PF09514 [SSXRD]		PF00096 [ZnF_C2H2]	1/1:21:60	4.1e-08	KPMAKDISIYFTKEEWAEMGEWEKVQYRNVKRNYKALIAI	1/1:23:60	7.3e-29	MAKDISIYFTKEEWAEMGEWEKVQYRNVKRNYKALIAI	1/1:23:60	5.2e-13	MAKDISIYFTKEEWAEMGEWEKVQYRNVKRNYKALIAI	1/1:23:60	7.6e-14	MAKDISIYFTKEEWAEMGEWEKVQYRNVKRNYKALIAI	1/1:23:60	5e-24	MAKDISIYFTKEEWAEMGEWEKVQYRNVKRNYKALIAI
52	PRDM9 ortho		XP_004436473	csim	Ceratotherium simum simum	Rhinoceros	Mammalia	PREDICTED: probable histone-lysine N-methyltransferase PRDM7-like [Ceratotherium simum simum]	MSSAGSPEESPEGDAGRSGRRPPAEDAFKDISTYFSKDEWTGMGDWEKRRHRNVKRNYEALIAIGLRAPRPAFMCHRRQAVKRREDDAEDSDEEWTPRQQVKPSWVAFRVEQSKQQKGMPRVPLSNESSLKELSETAKLQKTSDSEQVQKPVSPPREASTSGQLSRRKLELRRKEVEVKMYSLRERKGHAYQEVSEPQDDDYLYCEKCQNFFIDSCAAHGPPTFVKDSAVDKGHPNRSALTLPPGLRIRPSGIPEAGLGVWNEASDLPLGLHFGPYEGQITEDEEAANSGYSWLITKGRNCYEYVDGKDKSWANWMRYVNCARDDEEQNLVAFQYHRQIFYRTCRVVRPGCELLVWYGDEYGQELGIKWGSKWKRELTAGRGDKAYGPGSLVNIYPDQK…							1/1:25:64	1.2e-06	EDAFKDISTYFSKDEWTGMGDWEKRRHRNVKRNYEALIAI	1/1:27:64	5.2e-29	AFKDISTYFSKDEWTGMGDWEKRRHRNVKRNYEALIAI	1/1:27:64	7.9e-14	AFKDISTYFSKDEWTGMGDWEKRRHRNVKRNYEALIAI	1/1:27:64	1.2e-13	AFKDISTYFSKDEWTGMGDWEKRRHRNVKRNYEALIAI	1/1:27:64	1e-25	AFKDISTYFSKDEWTGMGDWEKRRHRNVKRNYEALIAI
53	PRDM9 ortho	-	A0A212CD86	cela	Cervus elaphus hippelaphus	European red deer	Mammalia	Uncharacterized protein	MAMRPNRSQEESTEGDAGRTERKPTAKDAFKDISVYFSKEEWEEMGEWEKIRYRNVKRNYEVLIAIGFRATQPAFMHHRRQLIKPQVDDTEDSDEEWTPRQQGKLSSMAFRVKHSKHQKGMSRASLSKESSLKELPGAAKLLKTSGSKQVPPPRKARTPGQHPREKVELRRKETGVKRYSLRERKGHVYQEVSEPQDDDYLYCEECQNFFIDSCAAHGPPTFVKDCAVEKGHANRSALTLPPGLSIRLSGIPDAGLGVWNEASDLPRGLHFGPYEGQITDDEEAANNGYSWLITKGRNCYEYVDGKDTSWANWMRPGCELLVWYGDEYGQDLGIKQDSRGKSELPAGIGEPKPKIHPCASCSLAFSSQKFLSQHIQRNHPSQTLLRPSERDLLQPEDPC…			PF01352 [KRAB]	PF09514 [SSXRD]			1/1:27:66	7.2e-10	KDAFKDISVYFSKEEWEEMGEWEKIRYRNVKRNYEVLIAI	1/1:29:66	3.3e-31	AFKDISVYFSKEEWEEMGEWEKIRYRNVKRNYEVLIAI	1/1:29:66	1.8e-16	AFKDISVYFSKEEWEEMGEWEKIRYRNVKRNYEVLIAI	1/1:29:66	1.1e-14	AFKDISVYFSKEEWEEMGEWEKIRYRNVKRNYEVLIAI	1/1:29:66	1.5e-27	AFKDISVYFSKEEWEEMGEWEKIRYRNVKRNYEVLIAI
54	PRDM9 ortho		A0A212C378	cela	Cervus elaphus hippelaphus	European red deer	Mammalia	KRAB-related domain-containing protein	MAMRPNRSQEESTEGDAGRTERKPTAKDAFKDISVYFSKEEWEEMGEWEKIRYRNMKRNYEVLIAIGFRATRPDFMHHRRQVIKPQVDDTEDSDEEWTPRQQGEGPGGFRGVFLKPAWA			PF01352 [KRAB]				1/1:27:66	3.3e-10	KDAFKDISVYFSKEEWEEMGEWEKIRYRNMKRNYEVLIAI	1/1:29:66	5.2e-31	AFKDISVYFSKEEWEEMGEWEKIRYRNMKRNYEVLIAI	1/1:29:66	2.8e-17	AFKDISVYFSKEEWEEMGEWEKIRYRNMKRNYEVLIAI	1/1:29:66	1.3e-14	AFKDISVYFSKEEWEEMGEWEKIRYRNMKRNYEVLIAI	1/1:29:66	7.3e-28	AFKDISVYFSKEEWEEMGEWEKIRYRNMKRNYEVLIAI
55	PRDM9 ortho		A0A212DD98	cela	Cervus elaphus hippelaphus	European red deer	Mammalia	KRAB-related domain-containing protein	MAMRPNRSPEESTEGDAGRTEWKPTAKDAFKDISVYFSKEEWEEMGEWEKIRYRNVKRNYEALIAIGFRATRPAFMHHHRQVIKPQVDDTEGSDEEWTPRQQGKPSSMTFRVEHSKHQKVSISQILLQKYPSHESSHSLKELLGAAKLLKTSGSKQAQKLALRPRKKDPCTAPQTKNCEECQNFFIDSCAAHRPPTFVKDYAVRKGHGNRSALTLPPGLSIRLSGIPDTGLGVWNEASDLPQGLHFGPYEGQIIDNEEAANSGYSWLVRSTHFPVLWPLISGVWWGGTSCLHARIQMVITRSAMTQSALCTVCPGREHRTSI			PF01352 [KRAB]				1/1:27:66	5.3e-10	KDAFKDISVYFSKEEWEEMGEWEKIRYRNVKRNYEALIAI	1/1:29:66	2.4e-31	AFKDISVYFSKEEWEEMGEWEKIRYRNVKRNYEALIAI	1/1:29:66	1.4e-16	AFKDISVYFSKEEWEEMGEWEKIRYRNVKRNYEALIAI	1/1:29:66	1.8e-14	AFKDISVYFSKEEWEEMGEWEKIRYRNVKRNYEALIAI	1/1:29:66	1.2e-27	AFKDISVYFSKEEWEEMGEWEKIRYRNVKRNYEALIAI
56	PRDM9 ortho		XP_013361028	clan	Chinchilla lanigera	Chinchilla	Mammalia	PREDICTED: histone-lysine N-methyltransferase PRDM9, partial	MSTPSTPEDSSEEDPAGAGQKSKVKDAFKDISRYFSKEEWAKMGEFEKKRYRNVKNSYTMMLSIGLRAHRPAFMCRGRRTSKPQLDDSEDSDEEWMPRQQVKPPWVASQGKQSKHWKGMPRALLSDGPSFKQLPGPANLQDPSDSEKPQTPESFPREGKNTGQHSRRKLEPRKKAVKPKMYSLRERKCHTYEEVSEPQDDDYLYCEKCKNYFIDSCPVHGPPAFIKDSVVDEGSSDRAVLSLPPGLRIGPSSIPGAGLGVWNEAFDLPLDLHFGPYEGQITEDEEAGHSGYSWMITKGRHCYEYVDGKDTSKANWMRYVNCARNEEEQNVVAFQYHRQIFYRTCQAIGPGSELFVWYGDEYGHELGLKWGSKWKKHQAAGRAAPKPAIYPCPVCSLAFS…							1/1:25:64	8.8e-07	KDAFKDISRYFSKEEWAKMGEFEKKRYRNVKNSYTMMLSI	1/1:27:64	3.5e-26	AFKDISRYFSKEEWAKMGEFEKKRYRNVKNSYTMMLSI	1/1:27:64	3.1e-14	AFKDISRYFSKEEWAKMGEFEKKRYRNVKNSYTMMLSI	1/1:27:64	1.5e-12	AFKDISRYFSKEEWAKMGEFEKKRYRNVKNSYTMMLSI	1/1:27:64	4.9e-23	AFKDISRYFSKEEWAKMGEFEKKRYRNVKNSYTMMLSI
57	PRDM9 ortho		XP_004679955	ccri	Condylura cristata	Star-nosed Mole	Mammalia	PREDICTED: histone-lysine N-methyltransferase PRDM9-like [Condylura cristata]	MAAVGVTALRLGVTGSRGSSASFKGHADPGRGDGGREPQAHRRRSGNGGKGRTWACKAPSTPTRKQKPEGGRGDSAPSARPRVPGSPGGPAAPVERPLRSGQRAPGRPGPAADLPGRRARQPGWGAPAAPLGPERTPASPLLRLLQVSSGLGGPGTLPAMSPVGPRAVSPEEEAPGCKPAAGRPPWPRPPAPQAEDAFRDIARHFSKAEWAAMGRWEKLRYRNLKRNYQALLALGLRAPRPAFMCRRRLALRPQGEDTEDSDEEWTPRQQVKHPWVVTFRAEQSKHQKGLSRAAGSNEPSLQVTSGIAALLNTSGSERAQKPVNLPKEANTSRQRSRQKLQLRRKKPDVKTYALRERKGHAYQEVSEPQDDDYLYCENCQNFFVDSCATHGPPTFVKDN…							1/1:195:234	1.3e-06	EDAFRDIARHFSKAEWAAMGRWEKLRYRNLKRNYQALLAL	1/1:197:234	7e-27	AFRDIARHFSKAEWAAMGRWEKLRYRNLKRNYQALLAL	1/1:197:234	2.2e-14	AFRDIARHFSKAEWAAMGRWEKLRYRNLKRNYQALLAL	1/1:197:234	9.3e-11	AFRDIARHFSKAEWAAMGRWEKLRYRNLKRNYQALLAL	1/1:197:234	1.9e-22	AFRDIARHFSKAEWAAMGRWEKLRYRNLKRNYQALLAL
58	PRDM9 ortho	-	A0A3L7I8R4	cgri	Cricetulus griseus	Chinese Hamster	Mammalia	PRDM9	MSFRYFSIHRTIGSWTSPREMSCTRNTNKQEGNSPAGDAERLEWKPKVKDEFKDISIYFSKEEWAEMGEWEKIRYRNVKRNYKMLISIGLKAPRPAFMCYQRQAFKPQMDDSEDSDEEWTPKQQGSPPWVPFRVKHTKKQKETQRIPLNKESNVKEVSGSENLLSTSGSEHVQKTVFSPGEGNASGQHTGQKPKLRRKNVEVKMYSLRERKDLAYEEVNEPQDDDYLYCEKCQNFFINSCPSHGPPIFVKDSMVDRGHPNCSVLSLPPGLRIGPSGIPEAGLGVWNEASDLPVGLHFGPYKGQITDDEEAANSGYSWLITKGRNCYEYVDGQEESQANWMRYVNCARDDEEQNLVAFQYHRQIFYRTCRVINPGCELLVWYGDEYGQELGIQWGRKNKK…			PF01352 [KRAB]	PF09514 [SSXRD]		PF00096 [ZnF_C2H2]	1/1:49:88	4.4e-10	KDEFKDISIYFSKEEWAEMGEWEKIRYRNVKRNYKMLISI	1/1:51:88	1.4e-30	EFKDISIYFSKEEWAEMGEWEKIRYRNVKRNYKMLISI	1/1:51:88	5.5e-15	EFKDISIYFSKEEWAEMGEWEKIRYRNVKRNYKMLISI	1/1:51:88	1.8e-14	EFKDISIYFSKEEWAEMGEWEKIRYRNVKRNYKMLISI	1/1:51:88	2.3e-26	EFKDISIYFSKEEWAEMGEWEKIRYRNVKRNYKMLISI
59	PRDM9 ortho		XP_022439261	dleu	Delphinapterus leucas	Beluga whale	Mammalia	probable histone-lysine N-methyltransferase PRDM7, partial	HARDPEQPIPEWWGGTFCALRTVPAAYWRDRFCRSTDWWLAPDGALQAGSAPFASPHLRSSRSCRSRSAHRAGAKDAFKDISIYFSKEEWTEMGEWEKIRYRNVKKNYEALITIGLRAPRPAFMCHRRQAIKAQVGDPEDSDEEWTPRQQVKPSWVAFRVEHSKHQKVMPPVPLSNESSLKKLPGAAQLQKASGPAQAQSPAPPPGAASTSAWHTRQKLERRAKQIEVKMYSLRERKGHVYQEVSEPQDDDYLYCEKCQNFFIDSCAAHGAPSFVKDSAVEKGHPNRSALTLPPGLSIRPSGIPEAGLGVWNEASDLPLGLHFGPYEGQITEDEEAANSGYSWLITKGRNCYEYVDGKDTSWANWMRYVNCARDEEEQNLVAFQYHRQIFYRTCRVVRP…							1/1:75:114	1.7e-09	KDAFKDISIYFSKEEWTEMGEWEKIRYRNVKKNYEALITI	1/1:77:114	8.5e-31	AFKDISIYFSKEEWTEMGEWEKIRYRNVKKNYEALITI	1/1:77:114	5.3e-15	AFKDISIYFSKEEWTEMGEWEKIRYRNVKKNYEALITI	1/1:77:114	3.1e-14	AFKDISIYFSKEEWTEMGEWEKIRYRNVKKNYEALITI	1/1:77:114	6.7e-26	AFKDISIYFSKEEWTEMGEWEKIRYRNVKKNYEALITI
60	PRDM9 ortho	-	K9J2Z2	drot	Desmodus rotundus	Common vampire bat	Mammalia	Putative histone-lysine n-methyltransferase prdm9	MNPDGGPQERPEGEAGRTGRKPQAEEAWKDVSLYFSGDEWAAMGDGEKGRHLKRNLDELLSRGLRAPRPPFMCHRRPAAELQEEHPGDSDEEWTPRRQVKPSWVAFRKEQSEHQKATSRMPLSNEYSLKELSGTANLMTASDSEQAQNPASPPGEACAFGQHTRRKSELRRKEIEVKMYTALRERKGRVYQEVSEPQDDDYLYCEKCQNFFIDSCAVHGPPAFVKDSAVDKGHPNRSALTLPPGLRIGPSGIPEAGLGVWNEAADLPVGLHFGPYEGHITEDEEAAKSRYSWLITKGRNCYEYVDGKDKSWANWMRYVNCARDDEEQNLVAFQYHRQIFYRTCRVVRPGCELLVWCGDEYGQELGSKWGSKWKRELAAGRAEPKPEIHPCPSCPLAFSS…				PF09514 [SSXRD]		PF00096 [ZnF_C2H2]	1/1:25:62	0.00048	EEAWKDVSLYFSGDEWAAMGDGEKGRHLKRNLDELLSR	1/1:27:62	2.9e-14	AWKDVSLYFSGDEWAAMGDGEKGRHLKRNLDELLSR	1/1:27:62	3e-05	AWKDVSLYFSGDEWAAMGDGEKGRHLKRNLDELLSR	1/1:27:62	4.7e-05	AWKDVSLYFSGDEWAAMGDGEKGRHLKRNLDELLSR	1/1:27:62	1e-10	AWKDVSLYFSGDEWAAMGDGEKGRHLKRNLDELLSR
61	PRDM9 ortho		XP_024426224	drot	Desmodus rotundus	Common vampire bat	Mammalia	LOW QUALITY PROTEIN: histone-lysine N-methyltransferase PRDM9-like	MNPDGVPQEHPEGEAGRTGLKPQAKDAWKDVSLYFSGEEWAAMGDWEKGRYRNLKRNFDVLLSLGLRAPRPAFMCHRRQATKLQEQDPEDSDEEWTPRQQVKPSWVAFRREQSEHQKATSRVPLNNKCSLKELSGTANLMTASDSEQAPNPASPPGEACAFGQHTRRKSELRRKEMDMKMYSLQERKGQEISEPQDDDFLLTWSTALSLSDGHPNRSALTLPPGLRIGPSGIPEAGLGVWNEAADLPVGLHFGPYEGHITEDEEAAKSRYSWLIAKGRNCYEYVDGKDKSWANWMRYVNCARDDEEQNLVAFQYHRQIFYRTCRVVRPGCELLVWYGDECGQELGSKWGSKWKREFTAGRVEPKPEVHPCPSCSLAFSSQKFLSQHVKRSHPSQSLLGT…							1/1:25:64	9.5e-07	KDAWKDVSLYFSGEEWAAMGDWEKGRYRNLKRNFDVLLSL	1/1:27:64	1.6e-25	AWKDVSLYFSGEEWAAMGDWEKGRYRNLKRNFDVLLSL	1/1:27:64	1.6e-11	AWKDVSLYFSGEEWAAMGDWEKGRYRNLKRNFDVLLSL	1/1:27:64	4.3e-12	AWKDVSLYFSGEEWAAMGDWEKGRYRNLKRNFDVLLSL	1/1:27:64	9.2e-22	AWKDVSLYFSGEEWAAMGDWEKGRYRNLKRNFDVLLSL
62	PRDM9 ortho	-	A0A1S3EXY4	dord	Dipodomys ordii	Ord's kangaroo rat	Mammalia	histone-lysine N-methyltransferase PRDM9-like	MDPWMSGMWTLDSVYCGHWNLGSVDMWIWECGHRFCPQPPPPGPRPPPPGPQPPPPGPRPPPPGPPAPSTGAPASSTGTPGLLHRDLSPLHRGPGLLHRDLSPSTGTPASSTGTPASSTGAPASSTGTPGLLHRDPGPLHRGPGLLHRDLSPSTGTPASSTGTPASSTGTSALSPLHRDLSPLRRDPCPQPPPPGPQPPPPGPPPSAPSTGPSAPSTGTPALSPLHRALSFLHRALSFLHRALSPLHRALSPLHRDPRPQPPPPGPQPSASSTGTSAPSTGTPAASTGTPALSLLHRALSPLHRDPCPQPPPPGPPPSAPSTGTPAASTGTPALSLLHRALSPLHRDLSPLHRALTPVHRDLSPLHRDPRRLHRNPTPSARHPSPLARGPRVPQHRPPP…			PF01352 [KRAB]	PF09514 [SSXRD]	PF00856 [SET]	PF00096 [ZnF_C2H2]	1/1:475:514	4.9e-10	KDAFKDISMYFSKEEWAEMGEWEKIHYRNMKRNYNMLISI	1/1:477:514	1.9e-30	AFKDISMYFSKEEWAEMGEWEKIHYRNMKRNYNMLISI	1/1:477:514	9.9e-17	AFKDISMYFSKEEWAEMGEWEKIHYRNMKRNYNMLISI	1/1:477:514	2.5e-15	AFKDISMYFSKEEWAEMGEWEKIHYRNMKRNYNMLISI	1/1:477:514	5e-28	AFKDISMYFSKEEWAEMGEWEKIHYRNMKRNYNMLISI
63	PRDM9 ortho		XP_012860933	etel	Echinops telfairi	Lesser hedgehog tenrec	Mammalia	probable histone-lysine N-methyltransferase PRDM7	MAGEESLEGAVGNKGQKAKDSFRDIAIYFSKEEWAEMGEWEKFRYRNVKKNYEALLALGLRAPRPAFMCHHRPAAKGQVEDSEDSDEEWTPRQRLRPPWVASRGEQNKQQKGMHRAPQDNESSSKELPATTNSLSACNSEQSSQQFSSPPERGSVPVQHSRQKLEPRRKEVEVKMYSLRERKDHAYQELGEPQDDDYLYCEKCQNFFIDTCTVHGAPTFVKDSPMDKGCPNHSALTLPPGLRIGPSSIPEAGLGVWNEESELPLGLHFGPYEGQMTEDEEAANSGYSWLITKGRNCYEYVDGKDTSWANWMRYVNCARDEEEQNLVAFQYRRQIFYRTCRAIQPGCELLVWYGDEYGLELGIKWGSKWKKELTSGTVSLMENFLFQENQNQRSIHAPPA…							1/1:19:58	6.3e-11	KDSFRDIAIYFSKEEWAEMGEWEKFRYRNVKKNYEALLAL	1/1:21:58	1.4e-28	SFRDIAIYFSKEEWAEMGEWEKFRYRNVKKNYEALLAL	1/1:21:58	1.6e-14	SFRDIAIYFSKEEWAEMGEWEKFRYRNVKKNYEALLAL	1/1:21:58	1.1e-13	SFRDIAIYFSKEEWAEMGEWEKFRYRNVKKNYEALLAL	1/1:21:58	1.4e-24	SFRDIAIYFSKEEWAEMGEWEKFRYRNVKKNYEALLAL
64	PRDM9 ortho		XP_022367152	elut	Enhydra lutris kenyoni	Sea otter	Mammalia	LOW QUALITY PROTEIN: probable histone-lysine N-methyltransferase PRDM7	MYAHREHIPPASETLRTISLQAHKSLRLHRPQGNSTRFGLGTERLMRPLTASESEQGLPGGPSTRSLNRPPEETPERDSGRTGWKPTVRDAFKDISVYFSKEEWTEMGDWEKIRYRNVKRNYEALITIGLRAPRPAFMCHRRQAIKPQVDDTEDSDEEWTPRQQVRPSWVAFRMEQSKHQKGIPRAPLSNEYSLKELSETAKLLNTSGSEQGQKPVSLPGEASTSGQHSLRKLELRRKDVEVKMYSLRERKSLAYQEVSEPQDDDYLYCEKCQNFFIDSCAVHGPPTFVKDSAVDKGQPNRSALTLPPGLRIRPSGIPQAGLGVWNEASDLPLGLHFGPYEGQITEDEEAANSGYSWLITKGRNCYEYVDGKDNSWANWMRYVNCARDDEEQNLVAFQY…			PF01352 [KRAB]	PF09514 [SSXRD]	PF00856 [SET]		1/1:89:128	2.5e-09	RDAFKDISVYFSKEEWTEMGDWEKIRYRNVKRNYEALITI	1/1:91:128	7e-32	AFKDISVYFSKEEWTEMGDWEKIRYRNVKRNYEALITI	1/1:91:128	7.9e-16	AFKDISVYFSKEEWTEMGDWEKIRYRNVKRNYEALITI	1/1:91:128	1.3e-14	AFKDISVYFSKEEWTEMGDWEKIRYRNVKRNYEALITI	1/1:91:128	1.3e-27	AFKDISVYFSKEEWTEMGDWEKIRYRNVKRNYEALITI
65	PRDM9 ortho	PRDM7	F6ZUP7	ecab	Equus caballus	horse	Mammalia	Uncharacterized protein	MSAGAVSPRLCPEQSAAGDQGSARRGATAEDAFKDISVYFSKQVWAEMGDWEKSRYRNVKRNYEALLTIGLRAPRPAFMCHRRRASRRRDEDAEDSDEEWTPRQQGEGWKRMRTAPLSNESRLKELSGTAKLLKTSSSEQVQKPVSPLGEASSSEQHSRRKLELRRKEVGVKMYSLRERKGHAYQEVSEPQDDDYLYCENCQNFFIDSCAAHGPPIFVKDSAVDKGHPNRSALTLPPGLRIRPSGIPEAGLGVWNEASDLPLGLHFGPYEGQITEDEEAANSGYSWLITKGRNCYEYVDGKDISWANWMRYVNCARDDEEQNLVAFQYHRQIFYRTCRVVRPGCELLVWYGDEYGQELGIKWGSKWKRELTAGREPKLEIHPCPSCSLAFSSQKFLSQH…				PF09514 [SSXRD]		PF00096 [ZnF_C2H2]	1/1:30:69	6.1e-07	EDAFKDISVYFSKQVWAEMGDWEKSRYRNVKRNYEALLTI	1/1:32:69	7.6e-30	AFKDISVYFSKQVWAEMGDWEKSRYRNVKRNYEALLTI	1/1:32:69	6.8e-14	AFKDISVYFSKQVWAEMGDWEKSRYRNVKRNYEALLTI	1/1:32:69	5.3e-14	AFKDISVYFSKQVWAEMGDWEKSRYRNVKRNYEALLTI	1/1:32:69	3.3e-26	AFKDISVYFSKQVWAEMGDWEKSRYRNVKRNYEALLTI
66	PRDM9 ortho		XP_008542766	eprz	Equus przewalskii	Przewalski's horse	Mammalia	probable histone-lysine N-methyltransferase PRDM7, partial	PLLAANWLDRLGRSADWRLVLGRALQAGSSRSAAFTSRGRAARRAAERAPGQGGQRAEDAFKDISVYFSKQVWAEMGDWEKSRYRNVKRNYEALLTIGLRAPRPAFMCHRRRASRRRDEDAEDSDEEWTPRQQVKPSWVAFRVEQSKQQKGMRTAPLSNESRLKELSGTAKLLKTSSSEQVQKPVSPLGEASSSEQHSRRKLELRRKEVGVKMYSLRERKGHAYQEVSEPQDDDYLYCENCQNFFIDSCAAHGPPIFVKDSAVDKGHPNRSALTLPPGLRIRPSGIPEAGLGVWNEASDLPLGLHFGPYEGQITEDEEAANSGYSWLITKGRNCYEYVDGKDISWANWMRYVNCARDDEEQNLVAFQYHRQIFYRTCRVVRPGCELLVWYGDEYGQELG…							1/1:58:97	6.1e-07	EDAFKDISVYFSKQVWAEMGDWEKSRYRNVKRNYEALLTI	1/1:60:97	7.6e-30	AFKDISVYFSKQVWAEMGDWEKSRYRNVKRNYEALLTI	1/1:60:97	6.8e-14	AFKDISVYFSKQVWAEMGDWEKSRYRNVKRNYEALLTI	1/1:60:97	5.3e-14	AFKDISVYFSKQVWAEMGDWEKSRYRNVKRNYEALLTI	1/1:60:97	3.3e-26	AFKDISVYFSKQVWAEMGDWEKSRYRNVKRNYEALLTI
67	PRDM9 ortho	PRDM7	XP_016047293	eeur	Erinaceus europaeus	European hedgehog	Mammalia	PREDICTED: probable histone-lysine N-methyltransferase PRDM7	MSLEKPQEERPEEDTGRTERKLMIKDAFKDISIYFSKKEWTEMGDWEKIRYRNVKRNYEKLITIGLRAPRPAFMCHRRQATKSKLDDTEDSDEEWTPRQQVKPSWMIFRVEKSKHQKGVLKQPVHSESSFKELSETANLLNTSDSEQAQKPVSPLEEAVATGQHSKKKMEFRRKETLVKMYSLRERKDHAYQEVSEPQDDDYLYCETCQNFFIDSCAVHGSPVFIKDKAVDKGHPDRSALTLPPGLTIRPSGIPEAGLGIWNEGSDLPVGVHFGPYEGQITDDEEAANSGYSWLITKGRNCYEYVDGENKSWANWMRYVNCARNDEEQNLVAFQYHRQIFYRTCRVIQPGCELLVWYGDEYGQELGIKWGSKWKKELTAEQESKSEIHLCPSCSLAFSA…			PF01352 [KRAB]	PF09514 [SSXRD]	PF00856 [SET]	PF00096 [ZnF_C2H2]	1/1:25:64	1.4e-08	KDAFKDISIYFSKKEWTEMGDWEKIRYRNVKRNYEKLITI	1/1:27:64	7.2e-30	AFKDISIYFSKKEWTEMGDWEKIRYRNVKRNYEKLITI	1/1:27:64	3.3e-15	AFKDISIYFSKKEWTEMGDWEKIRYRNVKRNYEKLITI	1/1:27:64	4.3e-14	AFKDISIYFSKKEWTEMGDWEKIRYRNVKRNYEKLITI	1/1:27:64	4.8e-26	AFKDISIYFSKKEWTEMGDWEKIRYRNVKRNYEKLITI
68	PRDM9 ortho		XP_027948210	ejub	Eumetopias jubatus	Steller sea lion	Mammalia	probable histone-lysine N-methyltransferase PRDM7	MSLNGSAEETPERDSGGTGWKPTVRDAFKDISTYFSKEEWTEMGDWEKIRYRNVKRNYEALITIGLRAPRPAFMCHRRQAIRPQVHDTEDSDEEWTPRQQVRPSWVAFRMEQNKHQKGIPRAPLSNESSLKELSETAKLLNTSGSEQGQKPVSPPGEASTSGHHSLQKLELRRKDIEVKMYSLRERKSLAYQEVNEPQDDDYLYCEKCQNFFIDSCAVHGPPTFVKDSAVDKGQPNRSALTLPPGLRIRPSSIPQAGLGVWNEASDLPLGLHFGPYEGQITEDEEAANSGYSWLITKGRNCYEYVDGKDNSWANWMRYVNCARDDEEQNLVAFQYHRQIFYRTCRVIRPGCELLVWYGDEYGQELGIKWGSKWKSELTAGKGDNACNTGSCVNIYLTKN…							1/1:25:64	6.9e-08	RDAFKDISTYFSKEEWTEMGDWEKIRYRNVKRNYEALITI	1/1:27:64	1.3e-31	AFKDISTYFSKEEWTEMGDWEKIRYRNVKRNYEALITI	1/1:27:64	2.5e-16	AFKDISTYFSKEEWTEMGDWEKIRYRNVKRNYEALITI	1/1:27:64	1.5e-14	AFKDISTYFSKEEWTEMGDWEKIRYRNVKRNYEALITI	1/1:27:64	1.6e-27	AFKDISTYFSKEEWTEMGDWEKIRYRNVKRNYEALITI
69	PRDM9 ortho	PRDM7	A0A337SHT6	fcat	Felis catus	cat	Mammalia	Uncharacterized protein	TSPLRFPEQSAERGSRKAKDAFKDISIYFSKEEWTEMGDWEKIRYRNVKRNYEALMTIGLRAPRPAFMCHRRQAIKPQVDVTEDSDEEWTPRQQVKPSWVASRVDQNKQHKVMPLSKESSLKDFSETAKLLNTSGSEQGQKPVSLPGEASTSGHHSRRKLELRRKEIGVKMYSLRERKGFAYQEVSEPQDDDYLYCEKCQNFFIDSCAVHGPPTFVKDNAVGKGHPNRSALTLPPGLRIRPSSIPEAGLGVWNEASDLPLGTHFGPYEGQITEDEEAANSGYSWLITKGRNCYEYVDGKDNSWANWMRYVNCARDDEEQNLVAFQYHRQIFYRTCRVIRPGCELLVWYGDEYGQELGIKWGSKWKSELSTGKEPQPDIHRCPSCSLAFSSQKFLSQHVE…			PF01352 [KRAB]	PF09514 [SSXRD]	PF00856 [SET]	PF00096 [ZnF_C2H2]	1/1:19:58	3.5e-09	KDAFKDISIYFSKEEWTEMGDWEKIRYRNVKRNYEALMTI	1/1:21:58	7.2e-31	AFKDISIYFSKEEWTEMGDWEKIRYRNVKRNYEALMTI	1/1:21:58	1.4e-15	AFKDISIYFSKEEWTEMGDWEKIRYRNVKRNYEALMTI	1/1:21:58	3.8e-14	AFKDISIYFSKEEWTEMGDWEKIRYRNVKRNYEALMTI	1/1:21:58	1.1e-26	AFKDISIYFSKEEWTEMGDWEKIRYRNVKRNYEALMTI
70	PRDM9 ortho	-	A0A091CTB0	fdam	Fukomys damarensis	Damaraland mole rat	Mammalia	Histone-lysine N-methyltransferase PRDM9	MSAQSSPEHRPEEEKEEDSAGAGPPPKVKDAFKDISRYFSKEEWAKMGEFEKKRYRNVKNNYSTMLSIGLKARRPAFMCRRRRTSTTNPPVGDSDDSDEEWTPRQPVKPPWVALRVEQSKHRKGLPRALLNSEPRPKGPPGTASLQDTGGPDRTQTPASCPGEARDSGQHSRRKLEARGKRVAPKMYSLRERKCHTYQEVSEPQDDDYLYCEKCKNYFLESCPAHGPPAFVKDSAWKLSPPDTQITKGRHCYEYVDGKDTSRANWMRYVNCARDEEEQNLVAFQYHRQIFYRTCQAIRPGSELFVWYGNEYGEELGIKWGSKWKKQRAAGTGPKAEVHPCPSCSLAFSSQRFLSQHVKRSHPSQICPGTPVRKNPKTESPHLEDHRQESDPRSRRKDEG…			PF01352 [KRAB]	PF09514 [SSXRD]	PF00856 [SET]		1/1:29:68	1.6e-08	KDAFKDISRYFSKEEWAKMGEFEKKRYRNVKNNYSTMLSI	1/1:31:68	3e-27	AFKDISRYFSKEEWAKMGEFEKKRYRNVKNNYSTMLSI	1/1:31:68	2.4e-15	AFKDISRYFSKEEWAKMGEFEKKRYRNVKNNYSTMLSI	1/1:31:68	6.5e-13	AFKDISRYFSKEEWAKMGEFEKKRYRNVKNNYSTMLSI	1/1:31:68	1.8e-24	AFKDISRYFSKEEWAKMGEFEKKRYRNVKNNYSTMLSI
71	PRDM9 ortho		XP_008561847	gvar	Galeopterus variegatus	Sunda flying lemur	Mammalia	probable histone-lysine N-methyltransferase PRDM7	MSLNGSPEENPEGDAGRTGRKPTVRDAFKDISIYFSKEEWVEMGKXEKICYRNVKRDYNELINKGRRAPRPAFMCHRRQAKLHVDDPEDSDEEWTPGRKQVKPHRVACRVEKSKHQTGMSRAPLSNESRLKKLSATTVSLNASDSEKAQKRVSPPAEASTSGQCSREKMELRREEIELKTYSLRERKGRSYKEVKEPQDDDYLYCEQCQNIFIDSCLAHGPPTFVKDNAVAKGHPNCSALTLPPGLRIGPSGIPDAGLRVWNEASDLPLGLHFSPYEGRITEDEEVANSGYSWQITKGRNCYEYVDGKDKSRANWMRYVNCARDDEEQKLVAFQQHRKIFYRTCQVIRPGELLAWYGDEYGQKLGIKQGSKWKKELTAGRGGHHYYPIKRTEKEEFSLG…							1/1:25:64	1.5e-06	RDAFKDISIYFSKEEWVEMGKXEKICYRNVKRDYNELINK	1/1:27:64	1.5e-24	AFKDISIYFSKEEWVEMGKXEKICYRNVKRDYNELINK	1/1:27:64	2.5e-13	AFKDISIYFSKEEWVEMGKXEKICYRNVKRDYNELINK	1/1:27:64	1.3e-11	AFKDISIYFSKEEWVEMGKXEKICYRNVKRDYNELINK	1/1:27:64	1.1e-20	AFKDISIYFSKEEWVEMGKXEKICYRNVKRDYNELINK
72	PRDM9 ortho		XP_028639329	gsur	Grammomys surdaster	African woodland thicket rat	Mammalia	histone-lysine N-methyltransferase PRDM9-like	MSYAMNTNKPEENSSEGDAGKLEWKHKVKDEFKDISIYFSKEEWAEMGEWEKIRYRNVKRNYKMLISIGLRAPRPAFMCYQRQAIKPQINDSEDSDEEWTPKQQVSPPWVPFRVKHSKQQKESPRVPLSGESNVKEGSEIENLLNTSGSEHAQKPVSSPEEGNTSGQHSGKKLKLRKKNVEVKMYRLRERKGLAYEEVSEPQDDDYLYCEKCQNFFIDSCPNHGPPLFVKDSVVDRGHPNHSVLSLPPGLRIGPSGIPEAGLGVWNETSDLPVGLHFGPYEGQITEDEESANSGYSWLITKGRNCYEYVDGQDESQANWMRYVNCARDDEEQNLVAFQYHRKIFYRTCRVIRPGCELLVWYGDEYGQELGIKWGSRMKKGFIAGRGRHYYDSLKKKEKR…							1/1:29:68	4.4e-10	KDEFKDISIYFSKEEWAEMGEWEKIRYRNVKRNYKMLISI	1/1:31:68	1.4e-30	EFKDISIYFSKEEWAEMGEWEKIRYRNVKRNYKMLISI	1/1:31:68	5.5e-15	EFKDISIYFSKEEWAEMGEWEKIRYRNVKRNYKMLISI	1/1:31:68	1.8e-14	EFKDISIYFSKEEWAEMGEWEKIRYRNVKRNYKMLISI	1/1:31:68	2.3e-26	EFKDISIYFSKEEWAEMGEWEKIRYRNVKRNYKMLISI
73	PRDM9 ortho		A0A3P4S1I2	ggul	Gulo gulo	Wolverine	Mammalia	KRAB-related domain-containing protein	MRPLPASESKQGLPGGPSTGSLNRPPEETPERDLGRTGWKPMAKDAFKDISMYFSKEEWSEMGDWEKIRYRNVKRNYEALITIGLRAPRPAFMCHRRQAIKPQVDDPEDSDEEWTPRQQVRPSWVAFRMEQSKHQKGIPRVPLSDESSLKELSETAKLLNTSGSEQG			PF01352 [KRAB]				1/1:44:83	1.6e-08	KDAFKDISMYFSKEEWSEMGDWEKIRYRNVKRNYEALITI	1/1:46:83	5.5e-31	AFKDISMYFSKEEWSEMGDWEKIRYRNVKRNYEALITI	1/1:46:83	6.7e-16	AFKDISMYFSKEEWSEMGDWEKIRYRNVKRNYEALITI	1/1:46:83	4.7e-15	AFKDISMYFSKEEWSEMGDWEKIRYRNVKRNYEALITI	1/1:46:83	9.1e-28	AFKDISMYFSKEEWSEMGDWEKIRYRNVKRNYEALITI
74	PRDM9 ortho		XP_021102049	hgla	Heterocephalus glaber	Naked Mole-rat	Mammalia	histone-lysine N-methyltransferase PRDM9 isoform X1	MYTHHPWACTEEGRGSSAWVPVPDPQAILPRSPRSGASREPGPQLLSFHRCLHLPGRCPGSMSAQSSSEDSPEEGSSEDSPEEGSSEAGQKPKVKDAFKDISRYFSKEEWARMGKFEKKRYRNVKNNYNMMLSIGLKPHRPAFMCQRRRTSNPLVDDTEDSDEEWTPRQQVRTPRVALRTEQSKRRTGRPRALLSADPRLKESPGAASLQDTGGPQETEPPVSSPRAGRNSGQRSRGKSEPRRKGIAPKVYSLRERKCRTYEEVSEPQDDDYLYCEKCKNYFIDSCAVHGAPAFVKDSAVAEGAADRAVLSLPPGLSIGPSSIPGAGLGVWNEASHLPLDLHFGPYEGQLTEDEEAGRSGYAWMVTKGRHCYEYVDGKDRSRANWMRYVNCARDEEEQN…							1/1:95:134	5.2e-08	KDAFKDISRYFSKEEWARMGKFEKKRYRNVKNNYNMMLSI	1/1:97:134	1.3e-27	AFKDISRYFSKEEWARMGKFEKKRYRNVKNNYNMMLSI	1/1:97:134	1.2e-14	AFKDISRYFSKEEWARMGKFEKKRYRNVKNNYNMMLSI	1/1:97:134	8e-13	AFKDISRYFSKEEWARMGKFEKKRYRNVKNNYNMMLSI	1/1:97:134	3.8e-24	AFKDISRYFSKEEWARMGKFEKKRYRNVKNNYNMMLSI
77	PRDM9 ortho		XP_005339707	itri	Ictidomys tridecemlineatus	Thirteen-lined ground squirrel	Mammalia	PREDICTED: histone-lysine N-methyltransferase PRDM9-like [Ictidomys tridecemlineatus]	MSCVANKKILKKNNFKKVSDSASSLVLVAAGKFCPEILGTGSLPQASGELESEPLHLEMTALKKRRLAGPHVRSADWQLYDSRHPSTLVGLRRPRLELGAWRQRRLRLCVGASLPQRPRPTAPGLQGVPPGAPNGPAVPEIPGLSPAARGSQVREGSARDRAAPSPASRLAKAEPAQRALCSTMSATDGSPDESTKGDLGRPERKPKVKDAFKDVSIYFSKEEWAEMGEWEKIRYRNVKRNYNMLISIGFRAPRPAFMCHQRQTIKLQMDDTEDSDEEWTPRQQVKPPWVASRVEQSKPQKVSPEVLLSNESSLKELSGTANLLNTSGSEQVQKPVSPLREASASRQHSRRKLELRTKEVEVKMYSLRERKGHAYKEVSEPQDDDYLYCDKCQNFFMDS…							1/1:209:248	7.2e-11	KDAFKDVSIYFSKEEWAEMGEWEKIRYRNVKRNYNMLISI	1/1:211:248	3.8e-31	AFKDVSIYFSKEEWAEMGEWEKIRYRNVKRNYNMLISI	1/1:211:248	4e-15	AFKDVSIYFSKEEWAEMGEWEKIRYRNVKRNYNMLISI	1/1:211:248	1.2e-14	AFKDVSIYFSKEEWAEMGEWEKIRYRNVKRNYNMLISI	1/1:211:248	3.5e-27	AFKDVSIYFSKEEWAEMGEWEKIRYRNVKRNYNMLISI
78	PRDM9 ortho		XP_004651122	jjac	Jaculus jaculus	lesser Egyptian Jerboa	Mammalia	PREDICTED: histone-lysine N-methyltransferase PRDM9-like, partial [Jaculus jaculus]	MNDDRLKNESRKGDARRPERKTKVKDEFKDISIYFSKEEWAEMGEWEKIRYRNVKRNYKMLISIGLKAPQPAFMCHQRQAIKLQMGDSEDSDEEWTPRKQVNPPRVAFRVEQTKQQKGMPRVPLSDESSLKKLSGTANLLNTSDSEHDQKLVSSPGEASTSGQHSGRKLDKKLTRKYVEAKMYSLRERKGRAYEEVSEPQDDDYLYCEKCQNFFINSCPIHGPPIFIKDSLVNKGHPNCSALSLPPGLRIRPSGIPDAGLGVWNEASDLPVGLHFGPYEGQITEDEEAANSGYSWMITKGRNCYEYVDGKDESQANWMRYVNCARDDEEQNLVAFQYHRQIFYRTCRVIRPGSELLVWYGDEYGQELGIKWGSKRKKVFTEGREQKPKIHPCLLCSLAF…							1/1:25:64	4.4e-10	KDEFKDISIYFSKEEWAEMGEWEKIRYRNVKRNYKMLISI	1/1:27:64	1.4e-30	EFKDISIYFSKEEWAEMGEWEKIRYRNVKRNYKMLISI	1/1:27:64	5.5e-15	EFKDISIYFSKEEWAEMGEWEKIRYRNVKRNYKMLISI	1/1:27:64	1.8e-14	EFKDISIYFSKEEWAEMGEWEKIRYRNVKRNYKMLISI	1/1:27:64	2.3e-26	EFKDISIYFSKEEWAEMGEWEKIRYRNVKRNYKMLISI
79	PRDM9 ortho		XP_026975694	lobl	Lagenorhynchus obliquidens	Pacific white sided dolphin	Mammalia	probable histone-lysine N-methyltransferase PRDM7, partial	AKDAFKDISIYFSKEEWTEMGEWEKIRYRNVKKNYEALVTLGLRAPRPAFMCHRRQAIKAQVGDPEDSDEEWTPRQQVKPSWVAFRVEHSKHQKVMPPVPLSNECSLKKLPGAAQLRKASGPAQAQSPAPPPGAASTSAWHTRQKLERRAKQVEVKMYSLRERKGHVYQEVSEPQDDDYLYCEKCQNFFIDSCAAHGAPTFVKDSAVEKGHPNRSALTLPPGLSIRPSGIPEAGLGVWNEASDLPLGLHFGPYEGQITEDEEAANSGYSWLITKGRNCYEYVDGKDTSWANWMRYVNCARDEEEQNLVAFQYHRQIFYRTCRVVRPGCELLVWYGDEYSQELGIPWGSGWKSQLVAAGRGGCHRSSNAKQEALLGSFHGPAFHQGKLQSGVSKVSIKML…							1/1:2:41	1.6e-10	KDAFKDISIYFSKEEWTEMGEWEKIRYRNVKKNYEALVTL	1/1:4:41	2.1e-30	AFKDISIYFSKEEWTEMGEWEKIRYRNVKKNYEALVTL	1/1:4:41	1.1e-15	AFKDISIYFSKEEWTEMGEWEKIRYRNVKKNYEALVTL	1/1:4:41	3.1e-14	AFKDISIYFSKEEWTEMGEWEKIRYRNVKKNYEALVTL	1/1:4:41	5e-26	AFKDISIYFSKEEWTEMGEWEKIRYRNVKKNYEALVTL
80	PRDM9 ortho	PRDM7	XP_007468548	lvex	Lipotes vexillifer	Chinese river dolphin	Mammalia	probable histone-lysine N-methyltransferase PRDM7	MSTDRWPEDSTEGDAGRAAWTPTARDAFKGISIYFSKEEWTEMGEWEKIRYRNVKKNYEALITLGLRAPRPAFMCRRRQAIKAQVGDPEDSDEEWTPRQQVKPSWGAFRVEHSKHQKVMPPVPLSNGSSLKKLPGAAQLQKASGPAQAQSPAPPPGAASTSAWHTRQKLERRTKQIDVKMYSLRERKGHVYQEVSEPQDDDYLYCEKCQNFFTDSCAAHGAPAFVKDSAAEKGRPNRSALTLPPGLSIRPSGIPEAGLGVWNEASDLPLGLHFGPYEGQITEDEEAANSGYSWLITKGRNCYEYVDGKDTSWANWMRYVNCARDEEEQNLVAFQYHRQIFYRTCRVVRPGCELLVWYGDEYSQELGIRRGSGSFLFQQTQSPTSIHVAPALWPSPVRKS…			PF01352 [KRAB]	PF09514 [SSXRD]	PF00856 [SET]		1/1:25:64	3.3e-08	RDAFKGISIYFSKEEWTEMGEWEKIRYRNVKKNYEALITL	1/1:27:64	1.8e-29	AFKGISIYFSKEEWTEMGEWEKIRYRNVKKNYEALITL	1/1:27:64	8.3e-15	AFKGISIYFSKEEWTEMGEWEKIRYRNVKKNYEALITL	1/1:27:64	8.9e-14	AFKGISIYFSKEEWTEMGEWEKIRYRNVKKNYEALITL	1/1:27:64	1.4e-25	AFKGISIYFSKEEWTEMGEWEKIRYRNVKKNYEALITL
81	PRDM9 ortho		XP_023397543	lafr	Loxodonta africana	African elephant	Mammalia	histone-lysine N-methyltransferase PRDM9	MSPARAAKKNPRGDVGSAGRTPTAKDTFRDISIYFSKEEWAEMGEWEKFRYRNVKRNYEALVTIGLRAPRPAFMCHRRQAIKAQVDNTEDSDEEWTPRQQVKPPSVASRAEQSRHQKGTPKALLGNESSLKEVSGTAILLNTTGSEQAQKPVSSPGEASTSDQPSRWKLEPRRNEVEVKMYNLRERKGLEYQEVSEPQDDDYLYCEKCQNFFIDTCAVHGAPMFVKDSPVDRGHPNHSALTLPPGLRIGPSSIPKAGLGVWNEASELPLGLHFGPYEGQVTEDKEAANSGYSWLITKGKNCYEYVDGKDESWANWMRYVNCARDEEEQNLVAFQYHRQIFYRTCRTIQPDCELLVWYGDEYGQELGIKWGSRWKKELTSGTEPKPEIHPCPSCRLAFSS…							1/1:25:64	1.2e-10	KDTFRDISIYFSKEEWAEMGEWEKFRYRNVKRNYEALVTI	1/1:27:64	1.4e-30	TFRDISIYFSKEEWAEMGEWEKFRYRNVKRNYEALVTI	1/1:27:64	1.1e-14	TFRDISIYFSKEEWAEMGEWEKFRYRNVKRNYEALVTI	1/1:27:64	4.8e-14	TFRDISIYFSKEEWAEMGEWEKFRYRNVKRNYEALVTI	1/1:27:64	7.7e-26	TFRDISIYFSKEEWAEMGEWEKFRYRNVKRNYEALVTI
82	PRDM9 ortho	-	A0A485NVD4	lpar	Lynx pardinus	Iberian lynx	Mammalia	Histone-lysine n-methyltransferase	MEPLPASESERGQPGGPGTTSPLRFPEQSAERSSRKARWKPTVRDAFKDISIYFSKEEWTEMGDWEKIRYRNVKRNYEVLMTIGLRAPRPAFMCHRRQAIKPQVDDTEDSDEEWTPRQQVKPSWVASRVDQNKQHKFFSSMLKVPLSKESSLKEFSETAKLLNTSGSEQGQKPVSLPGEASTSGHHSRRKLELRRKEIGVKMYSLRERKGFAYQEVSEPQDDDYLYCEKCQNFFIDSCAVHGPPTFVKDNAVGKGHPNRSALTLPPGLRIRPSSIPEAGLGVWNEASDLPLGTHFGPYEGQITEDEEAANSGYSWLITKGRNCYEYVDGKDNSWANWMRYVNCARDDEEQNLVAFQYHRQIFYRTCRVIRPGCELLVWYGDEYGQELGIKWGSKWKSEL…			PF01352 [KRAB]	PF09514 [SSXRD]	PF00856 [SET]	PF00096 [ZnF_C2H2]	1/1:44:83	4.6e-09	RDAFKDISIYFSKEEWTEMGDWEKIRYRNVKRNYEVLMTI	1/1:46:83	1e-30	AFKDISIYFSKEEWTEMGDWEKIRYRNVKRNYEVLMTI	1/1:46:83	1.7e-15	AFKDISIYFSKEEWTEMGDWEKIRYRNVKRNYEVLMTI	1/1:46:83	2.2e-14	AFKDISIYFSKEEWTEMGDWEKIRYRNVKRNYEVLMTI	1/1:46:83	1.3e-26	AFKDISIYFSKEEWTEMGDWEKIRYRNVKRNYEVLMTI
83	PRDM9 ortho		XP_015336536	mmar	Marmota marmota marmota	Alpine marmot	Mammalia	PREDICTED: histone-lysine N-methyltransferase PRDM9-like	MVWHVVYQKSDSKLMFASNLDEDLEQVHRKQGRFPVLAVKERRLAGPHVRSADWQLYDSRHPSTRVGLRRPRLELRAWRQRRLRLCKAEPAQRALCSTMSATDWSPDESTKGDLGRPERKPKVKDAFKDVSIYFSKEEWAEMGEWEKIRYRNVKRNYNMLISIGFRAPRPAFMCHQRQTIKLQMDDTEDSDEEWTPRQQVKPPWVASRVEQSKPQKGMPEVLLSNESSLKELSGTANLLNTSGSEQVQKPVSPLREASTSRQHSRRKLELRTKEVEVKMYSLRERKGHAYKEVSEPQDDDYLYCDKCQNFFIDSCPAHGPPTFVKDSVVNKDHSNHSTLSLPLGLRIGPSSIPEAGLGVWNEATDLPLGLHFGPYRGQITEDEEAANSGYSWLITKGRN…							1/1:124:163	7.2e-11	KDAFKDVSIYFSKEEWAEMGEWEKIRYRNVKRNYNMLISI	1/1:126:163	3.8e-31	AFKDVSIYFSKEEWAEMGEWEKIRYRNVKRNYNMLISI	1/1:126:163	4e-15	AFKDVSIYFSKEEWAEMGEWEKIRYRNVKRNYNMLISI	1/1:126:163	1.2e-14	AFKDVSIYFSKEEWAEMGEWEKIRYRNVKRNYNMLISI	1/1:126:163	3.5e-27	AFKDVSIYFSKEEWAEMGEWEKIRYRNVKRNYNMLISI
84	PRDM9 ortho		XP_021090343	maur	Mesocricetus auratus	Syrian Hamster	Mammalia	histone-lysine N-methyltransferase PRDM9-like	MSTNEQGGISPAGDAERPKVKDEFKDISIHFSKEEWAEMGEWEKIRYRNVKRNYKMLVSIGLKAPRPAFMCYQRQAFKPQIDDSEDSDEEWTPKRQGSPPWVPFQVKHTKQQKETQRIQKVSGPENLLNTSDSEHAQKPVSSLGEGNAVGQQAGQKPKLRRKNVEVKMYSLRERKGLAYEEVNEPQDDDYLYCEKCQNFFINSCPNHGPPIFVKDSVVDSGHPNRSVLSLPPGLRIGPSGIPEAGLGVWNEASDLPVGLHFGPYKGQITDDEEAANSGYSWLITKGRNCYEYVDGQDESQANWMRYVNCARDDEEQNLVAFQYHRQIFYRTCRIIRPGCELLVWYGDEYGQELGIQWGSKIKKGFATGRGEYYFGSLKNKEKEEFSLKMFMFQLFFP			PF01352 [KRAB]	PF09514 [SSXRD]	PF00856 [SET]		1/1:21:60	2.8e-10	KDEFKDISIHFSKEEWAEMGEWEKIRYRNVKRNYKMLVSI	1/1:23:60	5e-30	EFKDISIHFSKEEWAEMGEWEKIRYRNVKRNYKMLVSI	1/1:23:60	2.9e-14	EFKDISIHFSKEEWAEMGEWEKIRYRNVKRNYKMLVSI	1/1:23:60	2.1e-13	EFKDISIHFSKEEWAEMGEWEKIRYRNVKRNYKMLVSI	1/1:23:60	2.9e-25	EFKDISIHFSKEEWAEMGEWEKIRYRNVKRNYKMLVSI
85	PRDM9 ortho		XP_013207720	moch	Microtus ochrogaster	prairie vole	Mammalia	histone-lysine N-methyltransferase PRDM9-like	MSTHKLEENSQEGDAARLEWKPKVKDEFKDISIYFSKEEWAEMGEWEKIRYRNVKKNYKMLVSIGLKAPKPAFMCYQRQAIRPQIEDSEDSDEEWTPKQQVSPPWVPFRVKHTKQQKEVPGMPLSSESNVKKVPGIENLLDTSGSELAQKLVSSSGEGNASGQHSGQKPKPRRKKAEVKMYSLRERKDLAYEEVGEPQDDDYLYCEKCQNFFINSCPNHGLPIFIKDSEVDGGHPNHSVLSLPPGLRIGPSGIPEAGLGVWNEASDLPVGLHFGPYKGQITDDEEAANSGYSWLITKGRNCYEYVDGQDESQANWMRYVNCARDDEEQNLVAFQYHRQIFYRTCRVIRPGCELLVWYGDEYGQELGIQWGSKRKKGLTTGTELRTEIHPCLLCSLAFSS…							1/1:25:64	8.7e-11	KDEFKDISIYFSKEEWAEMGEWEKIRYRNVKKNYKMLVSI	1/1:27:64	1.4e-29	EFKDISIYFSKEEWAEMGEWEKIRYRNVKKNYKMLVSI	1/1:27:64	3.8e-14	EFKDISIYFSKEEWAEMGEWEKIRYRNVKKNYKMLVSI	1/1:27:64	2.5e-14	EFKDISIYFSKEEWAEMGEWEKIRYRNVKKNYKMLVSI	1/1:27:64	5.4e-25	EFKDISIYFSKEEWAEMGEWEKIRYRNVKKNYKMLVSI
86	PRDM9 ortho		XP_016071315	mnat	Miniopterus natalensis	Natal long-fingered bat	Mammalia	PREDICTED: LOW QUALITY PROTEIN: probable histone-lysine N-methyltransferase PRDM7	MNPDRCSQGSPEEEAGRAGWKPKVRDAFKDISFYFPREEWAEMGDWERARYRNVKRNYEMLLSLGSKNSLSLIRISRFWKKLPTKTLISRHLLVKPSWVTFRVEQSKYQKAMSRAPLSNDSSLKELSGTANLLTTSGSEPAQKPVSPPGEASTSGQHSRPKLELRRKGMEVQMYSLRERKGHVYQEVSEPQDDDYLYCEKCQNFFIDSCAVHGPPIFVKDSAVDKGHPNCSTLTLPPGLKIRLSGIPEAGFGVWNEESDLQVGLHFGPHEGQITEDEDAANSGYPWQITKGRNCYEYVDGKDKSWANWMRYVNCARDDEEQNLVAFQYHRQIFYRTCQVVRTGCELLVWYGEEYGQEWASSGAASGRESSWQGENQSQRFTHVPPALWPSPVRHSSANM…							1/1:25:64	8.9e-09	RDAFKDISFYFPREEWAEMGDWERARYRNVKRNYEMLLSL	1/1:27:64	1.3e-28	AFKDISFYFPREEWAEMGDWERARYRNVKRNYEMLLSL	1/1:27:64	9.8e-14	AFKDISFYFPREEWAEMGDWERARYRNVKRNYEMLLSL	1/1:27:64	4.5e-14	AFKDISFYFPREEWAEMGDWERARYRNVKRNYEMLLSL	1/1:27:64	4e-25	AFKDISFYFPREEWAEMGDWERARYRNVKRNYEMLLSL
87	PRDM9 ortho	PRDM7	XP_016277715	mdom	Monodelphis domestica	Opossum	Mammalia	PREDICTED: probable histone-lysine N-methyltransferase PRDM7	MSGDSSSDASPEEGSQSQGEDAFKDISTYFSKKQWVKLKEWEKVRLKNVKRNYEAMIKIGLSVPRPAFMCRGRQNKKVKVEESGDSDEEWIPKQLVKTLRFPSRAKQRTHPKNKAKKPADPKAEGMMDLSEELKTVVMNNLTISEEVKKQMDGICTSNQLTEGKLDCRRKDVEVHIYSLRERKYQVYQEMWDPQDDDYLYCEECQIFFLDSCPLHGPPTFVQDSAMVKGHPYCSAITLPPGLRIGLSGIPGAGLGVWNEASTLPLGLHFGPYKGKMTEDDEAANSGYSWMITKGRNCYEYVDGKEESCSNWMRYVNCARDEEEQNLVAFQYHRQIFYRTCRVIRPGCELLVWYGDEYGQELGIKWGSKWKRPLPELTDGETEAQGGKSQRAKTQMQVF				PF09514 [SSXRD]	PF00856 [SET]		1/1:20:59	2.5e-05	EDAFKDISTYFSKKQWVKLKEWEKVRLKNVKRNYEAMIKI	1/1:22:59	1.2e-26	AFKDISTYFSKKQWVKLKEWEKVRLKNVKRNYEAMIKI	1/1:22:59	2e-15	AFKDISTYFSKKQWVKLKEWEKVRLKNVKRNYEAMIKI	1/1:22:59	1.1e-11	AFKDISTYFSKKQWVKLKEWEKVRLKNVKRNYEAMIKI	1/1:22:59	1.4e-23	AFKDISTYFSKKQWVKLKEWEKVRLKNVKRNYEAMIKI
88	PRDM9 ortho	-	A0A4U1EQF6	mmon	Monodon monoceros	narwhal	Mammalia	Uncharacterized protein	HARDPEQPIPEWWGGTFCALRTVPAAYWRDRFCRSTDWWLAPDGALQAGSAPFASPHLRSSRSCRSRSAHRAGAKDAFKDISIYFSKEEWTEMGEWEKIRYRNVKKNYEALITIGLRAPRPAFMCHRRQAIKAQVGDPEDSDEEWTPRQQVKPSWLAFRVEHSKHQKVVPPVPLSNESSLKKLPGAAQLQKASGPAQAQSPAPPPGAASTSAWHTRQKLERRAKQIEVKMYSLRERKGHVYQEVSEPQDDDYLYCEKCQNFFIDSCAAHGAPSFVKDSAVEKGHPNRSALTLPPGLSIRPSGIPEAGLGVWNEASDLPLGLHFGPYEGQITEDEEAANSGYSWLITKGRNCYEYVDGKDTSWANWMRYVNCARDEEEQNLVAFQYHRQIFYRTCRVVRP…			PF01352 [KRAB]	PF09514 [SSXRD]	PF00856 [SET]	PF00096 [ZnF_C2H2]	1/1:75:114	1.7e-09	KDAFKDISIYFSKEEWTEMGEWEKIRYRNVKKNYEALITI	1/1:77:114	8.5e-31	AFKDISIYFSKEEWTEMGEWEKIRYRNVKKNYEALITI	1/1:77:114	5.3e-15	AFKDISIYFSKEEWTEMGEWEKIRYRNVKKNYEALITI	1/1:77:114	3.1e-14	AFKDISIYFSKEEWTEMGEWEKIRYRNVKKNYEALITI	1/1:77:114	6.7e-26	AFKDISIYFSKEEWTEMGEWEKIRYRNVKKNYEALITI
89	PRDM9 ortho	PRDM9	NP_659058	mmus	Mus musculus	house mouse	Mammalia	histone-lysine N-methyltransferase PRDM9 [Mus musculus]	MSCTMNTNKLEENSPEEDTGKFEWKPKVKDEFKDISIYFSKEEWAEMGEWEKIRYRNVKRNYKMLISIGLRAPRPAFMCYQRQAMKPQINDSEDSDEEWTPKQQVSPPWVPFRVKHSKQQKESSRMPFSGESNVKEGSGIENLLNTSGSEHVQKPVSSLEEGNTSGQHSGKKLKLRKKNVEVKMYRLRERKGLAYEEVSEPQDDDYLYCEKCQNFFIDSCPNHGPPLFVKDSMVDRGHPNHSVLSLPPGLRISPSGIPEAGLGVWNEASDLPVGLHFGPYEGQITEDEEAANSGYSWLITKGRNCYEYVDGQDESQANWMRYVNCARDDEEQNLVAFQYHRKIFYRTCRVIRPGCELLVWYGDEYGQELGIKWGSKMKKGFTAGRELRTEIHPCLLCSL…			PF01352 [KRAB]	PF09514 [SSXRD]	PF00856 [SET]	PF00096 [ZnF_C2H2]	1/1:29:68	4.4e-10	KDEFKDISIYFSKEEWAEMGEWEKIRYRNVKRNYKMLISI	1/1:31:68	1.4e-30	EFKDISIYFSKEEWAEMGEWEKIRYRNVKRNYKMLISI	1/1:31:68	5.5e-15	EFKDISIYFSKEEWAEMGEWEKIRYRNVKRNYKMLISI	1/1:31:68	1.8e-14	EFKDISIYFSKEEWAEMGEWEKIRYRNVKRNYKMLISI	1/1:31:68	2.3e-26	EFKDISIYFSKEEWAEMGEWEKIRYRNVKRNYKMLISI
90	PRDM9 ortho	PRDM9	W0TXY3	mmus	Mus musculus	house mouse	Mammalia	Prdm9 protein	MSCTMNTNKLEENSPEGDTGKFEWKPKVKDEFKDISIYFSKEEWAEMGKWEKIRYRNVKRNYKMLISIGLRAPRPAFMCYQRQAMKPQINDSEDSDEEWTPKQQVSPPWVPFRVKHSKQQKESSRMPFSGESNVKEGSGIENLLNTSGSEHVQKPVSSLEEGNTSGQHHSGKKLKLRKKNVEVKMYRLRERKGLAYEEVSEPQDDDYLYCEKCQNFFIDSCPNHGPPLFVKDSMVDRGHPNHSVLSLPPGLRISPSGIPEAGLGVWNEASDLPVGLHFGPYEGQITEDEEAANSGYSWLITKGRNCYEYVDGQDESQANWMRYVNCARDDEEQNLVAFQYHRKIFYRTCRVIRPGCELLVWYGDEYGQELGIKWGSKMKKGFTAGRELRTEIHPCLLCS…			PF01352 [KRAB]	PF09514 [SSXRD]	PF00856 [SET]	PF00096 [ZnF_C2H2]	1/1:29:68	5.7e-10	KDEFKDISIYFSKEEWAEMGKWEKIRYRNVKRNYKMLISI	1/1:31:68	3.1e-30	EFKDISIYFSKEEWAEMGKWEKIRYRNVKRNYKMLISI	1/1:31:68	5.6e-15	EFKDISIYFSKEEWAEMGKWEKIRYRNVKRNYKMLISI	1/1:31:68	2e-14	EFKDISIYFSKEEWAEMGKWEKIRYRNVKRNYKMLISI	1/1:31:68	3.4e-26	EFKDISIYFSKEEWAEMGKWEKIRYRNVKRNYKMLISI
91	PRDM9 ortho	PRDM9	W0TX95	mmusc	Mus musculus castaneus	southeastern Asian house mouse	Mammalia	Prdm9 protein	MSCTMNTNKLEENSPEEDTGKFEWKPKVKDEFKDISIYFSKEEWAEMGEWEKIRYRNVKRNYKMLISIGLRAPRPAFMCYQRQAMKPQINDSEDSDEEWTPKQQVSPPWVPFRVKHSKQQKESSRMPFSGESNVKEGSGIENLLNTSGSEHVQKPVSSLEEGNTSGQHSGKKLKLRKKNVEVKMYRLRERKGLAYKEVSEPQDDDYLYCEKCQNFFIDSCPNHGPPLFVKDSMVDRGHPNHSVLSLPPGLRISPSGIPEAGLGVWNEASDLPVGLHFGPYEGQITEDEEAANSGYSWLITKGRNCYEYVDGQDESQANWMRYVNCARDDEEQNLVAFQYHRKIFYRTCRVIRPGCELLVWYGDEYGQELGIKWGSKMKKGFTAGRELRTEIHPCLLCSL…			PF01352 [KRAB]	PF09514 [SSXRD]	PF00856 [SET]	PF00096 [ZnF_C2H2]	1/1:29:68	4.4e-10	KDEFKDISIYFSKEEWAEMGEWEKIRYRNVKRNYKMLISI	1/1:31:68	1.4e-30	EFKDISIYFSKEEWAEMGEWEKIRYRNVKRNYKMLISI	1/1:31:68	5.5e-15	EFKDISIYFSKEEWAEMGEWEKIRYRNVKRNYKMLISI	1/1:31:68	1.8e-14	EFKDISIYFSKEEWAEMGEWEKIRYRNVKRNYKMLISI	1/1:31:68	2.3e-26	EFKDISIYFSKEEWAEMGEWEKIRYRNVKRNYKMLISI
92	PRDM9 ortho	PRDM9	W0TXY0	mmusd	Mus musculus domesticus	Western European house mouse	Mammalia	Prdm9 protein	MSCTMNTNKLEENSPEEDTGKFEWKPKVKDEFKDISIYFSKEEWAEMGEWEKIRYRNVKRNYKMLISIGLRAPRPAFMCYQRQAMKPQINDSEDSDEEWTPKQQVSPPWVPFRVKHSKQQKESSRMPFSGESNVKEGSGIEILLNTSGSEHVQKPVSSLEEGNTSGQHSGKKLKLRKKNVEVKMYRLRERKGLAYEEVSEPQDDDYLYCEKCQNFFIDSCPNHGPPLFVKDSMVDRGHPNHSVLSLPPGLRISPSGIPEAGLGVWNEASDLPVGLHFGPYEGQITEDEEAANSGYSWLITKGRNCYEYVDGQDESQANWMRYVNCARDDEEQNLVAFQYHRKIFYRTCRVIRPGCELLVWYGDEYGQELGIKWGSKMKKGFTAGRELRTEIHPCLLCSL…			PF01352 [KRAB]	PF09514 [SSXRD]	PF00856 [SET]	PF00096 [ZnF_C2H2]	1/1:29:68	4.4e-10	KDEFKDISIYFSKEEWAEMGEWEKIRYRNVKRNYKMLISI	1/1:31:68	1.4e-30	EFKDISIYFSKEEWAEMGEWEKIRYRNVKRNYKMLISI	1/1:31:68	5.5e-15	EFKDISIYFSKEEWAEMGEWEKIRYRNVKRNYKMLISI	1/1:31:68	1.8e-14	EFKDISIYFSKEEWAEMGEWEKIRYRNVKRNYKMLISI	1/1:31:68	2.3e-26	EFKDISIYFSKEEWAEMGEWEKIRYRNVKRNYKMLISI
93	PRDM9 ortho	PRDM9	W0TWU8	mmusm	Mus musculus molossinus	Japanese field mouse	Mammalia	Prdm9 protein	MSCTMNTNKLEENSPEGDTGKFEWKPKVKDEFKDISIYFSKEEWAEMGEWEKIRYRNVKRNYKMLISIGLRAPRPAFMCYQRQAMKPQINDSEDSDEEWTPKQQVSPPWVPFRVKHSKQQKESSRMPFSGESNVKEGSGIENLLNTSGSEHVQKPVSSLEEGNTSGQHSGKKLKLRKKNVEVKMYRLRERKGLAYEEVSEPQDDDYLYCEKCQNFFIDSCPNHGPPLFVKDSMVDRGHPNHSVLSLPPGLRISPSGIPEAGLGVWNEASDLPVGLHFGPYEGQITEDEEAANSGYSWLITKGRNCYEYVDGQDESQANWMRYVNCARDDEEQNLVAFQYHRKIFYRTCRVIRPGCELLVWYGDEYGQELGIKWGSKRKKGFTAGGELRTEIHPCLLCSL…			PF01352 [KRAB]	PF09514 [SSXRD]	PF00856 [SET]	PF00096 [ZnF_C2H2]	1/1:29:68	4.4e-10	KDEFKDISIYFSKEEWAEMGEWEKIRYRNVKRNYKMLISI	1/1:31:68	1.4e-30	EFKDISIYFSKEEWAEMGEWEKIRYRNVKRNYKMLISI	1/1:31:68	5.5e-15	EFKDISIYFSKEEWAEMGEWEKIRYRNVKRNYKMLISI	1/1:31:68	1.8e-14	EFKDISIYFSKEEWAEMGEWEKIRYRNVKRNYKMLISI	1/1:31:68	2.3e-26	EFKDISIYFSKEEWAEMGEWEKIRYRNVKRNYKMLISI
94	PRDM9 ortho	PRDM9	W0TX90	mmusm	Mus musculus musculus	East European house mouse	Mammalia	Prdm9 protein	MSCTMNTNKLEENSPEGDTGKFEWKPKVKDEFKDISIYFSKEEWAEMGEWEKIRYRNVKRNYKMLISIGLRAPRPAFMCYQRQAMKPQINDSEDSDEEWTPKQQVSPPWVPFRVKHSKQQKESSRMPFSGESNVKEGSGIENLLNTSGSEHVQKPVSSLEEGNTSGQHSGKKLKLRKKNVEVKMYRLRERKGLAYEEVSEPQDDDYLYCEKCQNFFIDSCPNHGPPLFVKDSMVDRGHPNHSVLSLPPGLRISPSGIPEAGLGVWNEASDLPVGLHFGPYEGQITEDEEAANSGYSWLITKGRNCYEYVDGQDESQANWMRYVNCARDDEEQNLVAFQYHRKIFYRTCRVIRPGCELLVWYGDEYGQELGIKWGSKRKKGFTAGGELRTEIHPCLLCSL…			PF01352 [KRAB]	PF09514 [SSXRD]	PF00856 [SET]	PF00096 [ZnF_C2H2]	1/1:29:68	4.4e-10	KDEFKDISIYFSKEEWAEMGEWEKIRYRNVKRNYKMLISI	1/1:31:68	1.4e-30	EFKDISIYFSKEEWAEMGEWEKIRYRNVKRNYKMLISI	1/1:31:68	5.5e-15	EFKDISIYFSKEEWAEMGEWEKIRYRNVKRNYKMLISI	1/1:31:68	1.8e-14	EFKDISIYFSKEEWAEMGEWEKIRYRNVKRNYKMLISI	1/1:31:68	2.3e-26	EFKDISIYFSKEEWAEMGEWEKIRYRNVKRNYKMLISI
95	PRDM9 ortho		XP_021077189	mpah	Mus pahari	Gairdner's shrewmouse	Mammalia	histone-lysine N-methyltransferase PRDM9 isoform X1	MSCTMNTNKLEENGPEGDTGKLEWKPKVKDEFKDISIYFSKEEWAEMGEWEKIRYRNVKRNYKMLISIGLRAPRPAFMCYQRQTIKPQINDSEDSDEEWTPKQQVSPAWVPFRVKHSKQQKESPRMPFSGESNVKEGSGIENLLNTSGSEHAQKPVSSLEEGNTSGQHSGKKLSKKLRKKNIEVKMYRLRERKGLAYEEVSEPQDDDYLYCEKCQNFFIDSCPNHGPPLFVKDSVVDRGHPNHSVLSLPPGLRISPSGIPEAGLGVWNEASDLPVGLHFGPYEGQITEDEEAANSGYSWLITKGRNCYEYVDGQDESQANWMRYVNCARDDEEQNLVAFQYHRKIFYRTCRVIRPGCELLVWYGDEYGQELGIKWGSKMKKGFTAGRGGHYYDSLKKKD…							1/1:29:68	4.4e-10	KDEFKDISIYFSKEEWAEMGEWEKIRYRNVKRNYKMLISI	1/1:31:68	1.4e-30	EFKDISIYFSKEEWAEMGEWEKIRYRNVKRNYKMLISI	1/1:31:68	5.5e-15	EFKDISIYFSKEEWAEMGEWEKIRYRNVKRNYKMLISI	1/1:31:68	1.8e-14	EFKDISIYFSKEEWAEMGEWEKIRYRNVKRNYKMLISI	1/1:31:68	2.3e-26	EFKDISIYFSKEEWAEMGEWEKIRYRNVKRNYKMLISI
96	PRDM9 ortho	PRDM9	W0TWV1	mspr	Mus spretus	Western Mediterranean mouse	Mammalia	Prdm9 protein	MSCTMNTNKLKENSPEGDTRKFEWKPKVKDEFKDISIYFSKEEWAEMGEWEKIRYRNVKRNYKVLISIGLRAPRPAFMCYQRQAMKPQINDSEDSDEEWTPKQQVSPPWVPFRVKHSKQQKESSRMPFSGESNVKEGSGVENLLNTSGSEHAQKPVSSLEEGNISGQHSGKKLKLRKKNVEVKMYRLRERKGLAYEEVSEPQDDDYLYCEKCQNFFIDSCPNHGPPLFVKDSMVDRGHPNHSVLSLPPGLRISPSGIPEAGLGVWNEASDLPVGLHFGPYEGQITEDEEAANSGYSWLITKGRNCYEYVDGQDESQANWMRYVNCARDDEEQNLVAFQYHRKIFYRTCRVIRPGCELLVWYGDEYGQELGIKWGSKMKKGFTAGRELRTEIHPCLLCSL…			PF01352 [KRAB]	PF09514 [SSXRD]	PF00856 [SET]	PF00096 [ZnF_C2H2]	1/1:29:68	5.4e-10	KDEFKDISIYFSKEEWAEMGEWEKIRYRNVKRNYKVLISI	1/1:31:68	1.1e-30	EFKDISIYFSKEEWAEMGEWEKIRYRNVKRNYKVLISI	1/1:31:68	3e-15	EFKDISIYFSKEEWAEMGEWEKIRYRNVKRNYKVLISI	1/1:31:68	1.4e-14	EFKDISIYFSKEEWAEMGEWEKIRYRNVKRNYKVLISI	1/1:31:68	1.3e-26	EFKDISIYFSKEEWAEMGEWEKIRYRNVKRNYKVLISI
97	PRDM9 ortho	PRDM7	M3Y652	mput	Mustela putorius furo	European domestic ferret	Mammalia	PR/SET domain 7	MRPRTASESEQGLPGGPSTGSVSGPPEETPERDSGRTGRKPPAQDAFKDISVYFSKEEWTEMGDWEKIRYRNVKRNYEALITIGLRAPRPAFMCHRRQATIPRVDDTEDSDEEWTPRQQVRPSWVAFKMEQSKHQKGVPRAPLSNESSLKELSETAKLLNTSGSEHDQKPVSHPGEASTSGHHSLRKLELRRKDVEVKMYSLRERKSLAYQEVSEPQDDDYLYCEKCQNFFIDSCAVHGPPTFVKDSAVDKGQPNRSALTLPPGLRIRPSGIPQAGLGVWNEASDLPLGLHFGPYEGQITEDEEAANSGYSWLITKGRNCYEYVDGKDNSWANWMRYVNCARDDEEQNLVAFQYRRQIFYRTCRVIRPGCELLVWYGDEYGQELGIKWGSKWKSELTAE…			PF01352 [KRAB]	PF09514 [SSXRD]	PF00856 [SET]	PF00096 [ZnF_C2H2]	1/1:44:83	1.7e-09	QDAFKDISVYFSKEEWTEMGDWEKIRYRNVKRNYEALITI	1/1:46:83	7e-32	AFKDISVYFSKEEWTEMGDWEKIRYRNVKRNYEALITI	1/1:46:83	7.9e-16	AFKDISVYFSKEEWTEMGDWEKIRYRNVKRNYEALITI	1/1:46:83	1.3e-14	AFKDISVYFSKEEWTEMGDWEKIRYRNVKRNYEALITI	1/1:46:83	1.3e-27	AFKDISVYFSKEEWTEMGDWEKIRYRNVKRNYEALITI
98	PRDM9 ortho	PRDM7	XP_021560692	nsch	Neomonachus schauinslandi	Hawaiian monk seal	Mammalia	probable histone-lysine N-methyltransferase PRDM7	MSLNRSPEETPERDSGRTGWKPTVRDAFKDISIYFSKEEWTEMGDWEKIRYRNVKRNYETLITIGLRAPRPAFMCHRRQAIKPQVDDTEDSDEEWTPRQQVRPSWVAFRMEQNKHQKGIPRAPLSNESSLKELSETAKLLNTSGSEQGQKPVSPPGEESTSGHHSLQKLELRRKDVEVKMYSLRERKSLAYQEVNEPQDDDYLYCEKCQNFFIDSCAVHGPPTFVKDSAVDKGQPNRSALTLPPGLRIRPSSIPQAGLGVWNEASDLPLGLHFGPYEGQITEDEEAANSGYSWLITKGRNCYEYVDGKDNSWANWMRYVNCARDDEEQNLVAFQYHRQIFYRTCRVIRPGCELLVWYGDEYGQELGIKWGSKWKSELTAGKGDNAYNTGSCVNIFLTKN…			PF01352 [KRAB]	PF09514 [SSXRD]	PF00856 [SET]		1/1:25:64	2.5e-09	RDAFKDISIYFSKEEWTEMGDWEKIRYRNVKRNYETLITI	1/1:27:64	1.3e-31	AFKDISIYFSKEEWTEMGDWEKIRYRNVKRNYETLITI	1/1:27:64	7.6e-16	AFKDISIYFSKEEWTEMGDWEKIRYRNVKRNYETLITI	1/1:27:64	6e-15	AFKDISIYFSKEEWTEMGDWEKIRYRNVKRNYETLITI	1/1:27:64	8.1e-28	AFKDISIYFSKEEWTEMGDWEKIRYRNVKRNYETLITI
99	PRDM9 ortho	PRDM7	A0A341AP68	nasi	Neophocaena asiaeorientalis asiaeorientalis	Yangtze finless porpoise	Mammalia	probable histone-lysine N-methyltransferase PRDM7	MSTDRWPEDSTEGDAGRTAGKPTAKDAFKDISIYFSKEEWTEMGEWEKVRYRNVKKNYEALITIGLRAPRPAFMCHRRQAIRAQVGDPEDSDEEWTPRQQVKPSWVAFRVEHSKHQKAVPPMPLSNESSLKKLPGAAQLQKASGPAQAQSPAPPPGAASTSAWHTRQKLERRAKQIEVKMYSLRERKGHVYQEVSEPQDDDYLYCEKCQNFFIDSCAAHGAPSFVKDSAVEKGHPNRSALTLPPGLSIRPSGIPEAGLGVWNEASDLPLGLHFGPYEGQITEDEEAANSGYSWLITKGRNCYEYVDGKDTSWANWMRYVNCARDEEEQNLVAFQYHRQIFYRTCRVVRPGCELLVWYGDEYSQELGIPRGSGWKSQLVAAGRDPKPKIPPCGSCSLAFS…			PF01352 [KRAB]	PF09514 [SSXRD]	PF00856 [SET]	PF00096 [ZnF_C2H2]	1/1:25:64	1.5e-09	KDAFKDISIYFSKEEWTEMGEWEKVRYRNVKKNYEALITI	1/1:27:64	7.3e-31	AFKDISIYFSKEEWTEMGEWEKVRYRNVKKNYEALITI	1/1:27:64	1.6e-14	AFKDISIYFSKEEWTEMGEWEKVRYRNVKKNYEALITI	1/1:27:64	2.5e-14	AFKDISIYFSKEEWTEMGEWEKVRYRNVKKNYEALITI	1/1:27:64	1.4e-25	AFKDISIYFSKEEWTEMGEWEKVRYRNVKKNYEALITI
100	PRDM9 ortho	-	A0A1A6GFD5	nlep	Neotoma lepida	Desert woodrat	Mammalia	Uncharacterized protein	MDDHRILDLPREMSCTMNTNKLEENSPKGDAGRLEWKSKVKDEFKDISIYFSKEEWAEMGEWEKIRYRNVKRNYKMLISIXSPSWVPFRVKHTKQQKGAPRMPLSNESNVKEVSGIENLLNTSGSEHAQKPVSSPGEGNASGQHSEQKPNCEKCQNFFISSCPNHGPPIFIKDSVVDRGHPNHSVLSLPPGLRIGPSGIPEAGLGVWNEASDLPIGLHFGPYKGQITEDEEAANSGYSWLITKGRNCYEYVNGQDESQANWMRYVNCARDDEEQNLVAFQYHRQIFYRTCRVIRPGCELLVWYGDEYGQELGIQWGSKRKKGFTTGKELRTEIHPCLLCSLAFSSPNFLSLHMQWNHRTQNFSGXSSTINSKPGDPCPDQLQEQQHLDSHNKTDQARSQ…			PF01352 [KRAB]		PF00856 [SET]		1/1:41:80	4.4e-10	KDEFKDISIYFSKEEWAEMGEWEKIRYRNVKRNYKMLISI	1/1:43:80	1.4e-30	EFKDISIYFSKEEWAEMGEWEKIRYRNVKRNYKMLISI	1/1:43:80	5.5e-15	EFKDISIYFSKEEWAEMGEWEKIRYRNVKRNYKMLISI	1/1:43:80	1.8e-14	EFKDISIYFSKEEWAEMGEWEKIRYRNVKRNYKMLISI	1/1:43:80	2.3e-26	EFKDISIYFSKEEWAEMGEWEKIRYRNVKRNYKMLISI
101	PRDM9 ortho		A0A2P6KAE2		Nephila clavipes	Golden silk orbweaver	Mammalia	KRAB-related domain-containing protein	MEHSADVDLSVKQFFDIDAWGRMSDFEKRCYSNKKRNYEFFLKIGLNPQKPEFMKSLRNSSNNCNLQALDDSKLGEKQVSKSSRKNSSEKNLKVDDDIQLTVSKTNNFSFGSCQAGREFFQNLRLRTKKHMKNLEILHELLETFLRDDENQNCE										1/1:7:44	1e-16	VDLSVKQFFDIDAWGRMSDFEKRCYSNKKRNYEFFLKI	1/1:7:44	9.4e-06	VDLSVKQFFDIDAWGRMSDFEKRCYSNKKRNYEFFLKI	1/1:7:44	1.6e-05	VDLSVKQFFDIDAWGRMSDFEKRCYSNKKRNYEFFLKI	1/1:7:44	1.3e-11	VDLSVKQFFDIDAWGRMSDFEKRCYSNKKRNYEFFLKI
102	PRDM9 ortho		XP_012786414	opri	Ochotona princeps	Southern American pika	Mammalia	PREDICTED: probable histone-lysine N-methyltransferase PRDM7	MDKVNVSEPGLRRDAPEAERGPRAMSAAPLEPSLGRVRAQGEQEVPDAFRDICVYFSRAEWAEMSESEKLRYRNVKRNYSALRAIGFRAPRPAFMCRRRLAGRAREEDTDDSDEEWTPRPQVKPPRMTFRMEQSKHQKGMPKVPTHHESSVTEAPRTAPFLRPVGSQQGRKPAFPPEEASASGQHSTRRLEGRRKTDLKIYSLRKRKSRTYKECSEPQDDDYLYCEMCQNFFIESCAVHGSPTFVKDNPVGKGHPHRSVLSLPSGLRIGPSGIPEAGLGVWNETTDLPLGLHFGPYEGQVTEEEEATNSGYSWLITKGRNRYEYVDGKDPSQANWMRYVNCARNDEEQNLVAFQYHRQIFYRTCRAVRQGCELLVWYGDEYGQELGIKWGSKWKEELTQ…							1/1:46:85	6.1e-09	PDAFRDICVYFSRAEWAEMSESEKLRYRNVKRNYSALRAI	1/1:48:85	4.1e-26	AFRDICVYFSRAEWAEMSESEKLRYRNVKRNYSALRAI	1/1:48:85	1e-13	AFRDICVYFSRAEWAEMSESEKLRYRNVKRNYSALRAI	1/1:48:85	1e-09	AFRDICVYFSRAEWAEMSESEKLRYRNVKRNYSALRAI	1/1:48:85	6.2e-22	AFRDICVYFSRAEWAEMSESEKLRYRNVKRNYSALRAI
103	PRDM9 ortho		XP_023562653	odeg	Octodon degus	Degu	Mammalia	histone-lysine N-methyltransferase PRDM9-like	MSRSACLSRDSSPESLPCGELDPSVHSALHPERFTDTEPAITEHRDSAAGQLPGLSAELPNVRAEALGLARGMRTWATSESRRGRGTGVPGASFECPRPTWKASSSAISCRAALPYPLSRHHERPQFLGGQLRGGHRRICVEPRGGWRERKGMPDLRGRYREDAFKDISRYFSREEWADMGEFEKKRYRNLKNNYTTMLSLGLRAQRPAFMRRRRRTGQAPQEDSEDSDAEWTPRRRQVKRPWVASRGEQSTSWKGAPTALSRSGPRVEQLPGSGSEEAPTPEPFRSEARNCRQRARRKPDPRSRALQPALYSLRERRGCRYEEVSEPQDDDYLYCERCQDYFLDSCPAHGPPAFLQDSAAAVVTGRHRYEYVDGKDTSQANWMRYVNCARDEEEQNLV…							1/1:162:201	2.4e-07	EDAFKDISRYFSREEWADMGEFEKKRYRNLKNNYTTMLSL	1/1:164:201	5.8e-26	AFKDISRYFSREEWADMGEFEKKRYRNLKNNYTTMLSL	1/1:164:201	2.2e-15	AFKDISRYFSREEWADMGEFEKKRYRNLKNNYTTMLSL	1/1:164:201	1.2e-12	AFKDISRYFSREEWADMGEFEKKRYRNLKNNYTTMLSL	1/1:164:201	5.9e-24	AFKDISRYFSREEWADMGEFEKKRYRNLKNNYTTMLSL
104	PRDM9 ortho		XP_004392228	oros	Odobenus rosmarus divergens	Pacific walrus	Mammalia	PREDICTED: histone-lysine N-methyltransferase PRDM9-like [Odobenus rosmarus divergens]	MNLNRSPEETPERDSGRTGWKPTVRDAFKDISIYFSKEEWTEMGDWEKIRYRNVKRNYEALITIGLRAPRPAFMCHRRQAIKPQVDDTEDSDEEWTPRQQVRPSWVAFRMEQNKHQKGIPRAPSSNESSLKELSETAKLLNTSGSEQGQKPVSPPGEASTSGHHSLQKLELRRKDIEVKMYSLRERKSLAYQEVNEPQDDDYLYCEKCQNFFIDSCAVHGPPTFVKDSAVDKGQPNRSALTLPPGLRIRPSSIPQAGLGVWNEASDLPLGLHFGPYEGQITEDEEAANSGYSWLITKGRNCYEYVDGKDNSWANWMRYVNCARDDEEQNLVAFQYHRQIFYRTCRVIRPGCELLVWYGDEYGQELGIKWGSKWKSELTAGKEPKPEIHPCPSCSLAFSS…			PF01352 [KRAB]	PF09514 [SSXRD]	PF00856 [SET]	PF00096 [ZnF_C2H2]	1/1:25:64	4e-09	RDAFKDISIYFSKEEWTEMGDWEKIRYRNVKRNYEALITI	1/1:27:64	4.9e-32	AFKDISIYFSKEEWTEMGDWEKIRYRNVKRNYEALITI	1/1:27:64	1.1e-15	AFKDISIYFSKEEWTEMGDWEKIRYRNVKRNYEALITI	1/1:27:64	1.2e-14	AFKDISIYFSKEEWTEMGDWEKIRYRNVKRNYEALITI	1/1:27:64	1.1e-27	AFKDISIYFSKEEWTEMGDWEKIRYRNVKRNYEALITI
105	PRDM9 ortho	PRDM9	XP_020737215	ovir	Odocoileus virginianus texanus	White-tailed deer	Mammalia	LOW QUALITY PROTEIN: histone-lysine N-methyltransferase PRDM9-like	MAMSPNRSQEESTEGDARRTERKPTAKDAFKDISIYFTKEEWAEMGEWEKIRYRNAKRNYEALIALGFRATRPAFMPHCRQVIKPQVDHTEDSDEEWTPRKQGKSSVMTFRVKHSKHQKGMPRAPLSKESSLKELPGAAKLLKTSGSKQVPRSRKARTPGQHPRQKVELRRKETGVKRYNLRERKGHVYQEVSEPQDDDYLYCEQCQNFFIDSCAAHGPPTFVKDCAVKRGHANRSALTLPPGLSIRLSGIPDAGLGVWNEASDLPRGLHFGPYEGQITDNEEAANSGYAWLITKGRNCYEYVDGKDTSWANWMRYVNCARDDEEQNLVAFQYHGQIFYRTCQVIRPGCELLVWYGDEYGQDLGIKWNSRGKSELATGREPKPKIHPCASCSLAFSSQK…							1/1:27:66	9.9e-09	KDAFKDISIYFTKEEWAEMGEWEKIRYRNAKRNYEALIAL	1/1:29:66	1.8e-30	AFKDISIYFTKEEWAEMGEWEKIRYRNAKRNYEALIAL	1/1:29:66	6.1e-16	AFKDISIYFTKEEWAEMGEWEKIRYRNAKRNYEALIAL	1/1:29:66	2.6e-14	AFKDISIYFTKEEWAEMGEWEKIRYRNAKRNYEALIAL	1/1:29:66	2.3e-27	AFKDISIYFTKEEWAEMGEWEKIRYRNAKRNYEALIAL
106	PRDM9 ortho	PRDM7	XP_020757538	ovir	Odocoileus virginianus texanus	White-tailed deer	Mammalia	LOW QUALITY PROTEIN: probable histone-lysine N-methyltransferase PRDM7	MAMSQNRSPEESTEGDAGRTEWKPTVKGRDIYIYFSKEEWAEMAEWKKIXYRDVKRNYEALIAIGFRATRPAFMHHRRQVDDTDNSDEEWTPRQQGKPSRMAFRVRHSKRQKGMSRGPLSKVSSLKKLPVEEKLLKKSGSKWAQKPVYTLRETRTPGQHSRQKVELRGKETGVKRYRLRERKDHVYQELSEPEDDDYLYCQECQDFFIDRCAAHGPPTFVKDTAVEKGHANRSALTLPPGLSIRLSGIPEAGLGVWNEASNLPLGLHFGPYEGQVTEDEEAAHNGYSWMITKGRNRYEYVDGKDTSLANWMRYVNCARHYEEQNLVALQYHGQIFYRTCQVVRPGCELLVWYGDEYGEELGIKRESRGKSMLAAGRGEGHPSSSTPTHPGELTLSNSEA…							1/1:25:64	1.5e-09	TVKGRDIYIYFSKEEWAEMAEWKKIXYRDVKRNYEALIAI	1/1:27:64	2e-23	KGRDIYIYFSKEEWAEMAEWKKIXYRDVKRNYEALIAI	1/1:27:64	3.4e-12	KGRDIYIYFSKEEWAEMAEWKKIXYRDVKRNYEALIAI	1/1:27:64	1.5e-12	KGRDIYIYFSKEEWAEMAEWKKIXYRDVKRNYEALIAI	1/1:27:64	5.2e-20	KGRDIYIYFSKEEWAEMAEWKKIXYRDVKRNYEALIAI
107	PRDM9 ortho		XP_004280174	oorc	Orcinus orca	Orca	Mammalia	PREDICTED: probable histone-lysine N-methyltransferase PRDM7, partial [Orcinus orca]	AKDAFKDISIYFSKEEWTEMGEWEKIRYRNVKKNYEALVTLGLRAPRPAFMCHRRQAIKAQVGDPEDSDEEWTPRQQVKPSWVAFRVEHSKHQKVMPPVPLSNESSLKKLPGAAQLQKASGPAQAQSPAPPPGAASTSAWRTRQKLERRAKQIEVKMYSLRERKGHVYQEVSEPQDDDYLYCEKCQNFFIDSCAAHGAPTFVKDSAVEKGHPNRSALTLPPGLSIRPSGIPEAGLGVWNEASDLPLGLHFGPYEGQITEDEEAANSGYSWLITKGRNCYEYVDGKDTSWANWMRYVNCARDEEEQNLVAFQYHRQIFYRTCRVVRPGCELLVWYGDEYSQELGIPWGSGWKSQLVAAGREDRQTQSPRSIHVAPALWPSPVRKSSANMWNAVTRLRSSR…							1/1:2:41	1.6e-10	KDAFKDISIYFSKEEWTEMGEWEKIRYRNVKKNYEALVTL	1/1:4:41	2.1e-30	AFKDISIYFSKEEWTEMGEWEKIRYRNVKKNYEALVTL	1/1:4:41	1.1e-15	AFKDISIYFSKEEWTEMGEWEKIRYRNVKKNYEALVTL	1/1:4:41	3.1e-14	AFKDISIYFSKEEWTEMGEWEKIRYRNVKKNYEALVTL	1/1:4:41	5e-26	AFKDISIYFSKEEWTEMGEWEKIRYRNVKKNYEALVTL
108	PRDM9 ortho		XP_017193924	ocun	Oryctolagus cuniculus	Rabbit	Mammalia	PREDICTED: histone-lysine N-methyltransferase PRDM9	MSAAAPAEPSPGADAGQARGKPEVQDAFRDISIYFSKEEWAEMGEWEKSRYRNVKRNYCALVAIGLRAPRPAFMCHRRLAVRARADDTEDSDEEWTPRQQVKPPWMAFRTEHSKHQKGMPRLPVNNESSLKELSGIANLLNTTGSEEDQKPSFPPKETRTSGQHSTRKLGLRRKNIEVKMYSFRKRKSQAYKECSEPQDDDYLYCEKCQNFFLDSCAVHGPPIFVKDSAVDKGHPNRSVLSLPPGLRIGPSGIPEAGLGVWNEASDLPLGLHFGPYEGQITEEEEAANSGYSWLITKGRNCYEYVDGKDRSWANWMRYVNCARNDEEQNLVAFQYHKQIFYRTCQVIKPGCELLVWYGDEYGQELGIKWGSKWKEELTAGREPKPEIHPCPSCSLAFSS…			PF01352 [KRAB]	PF09514 [SSXRD]	PF00856 [SET]	PF00096 [ZnF_C2H2]	1/1:25:64	2.8e-10	QDAFRDISIYFSKEEWAEMGEWEKSRYRNVKRNYCALVAI	1/1:27:64	8.6e-31	AFRDISIYFSKEEWAEMGEWEKSRYRNVKRNYCALVAI	1/1:27:64	1.8e-14	AFRDISIYFSKEEWAEMGEWEKSRYRNVKRNYCALVAI	1/1:27:64	1.5e-13	AFRDISIYFSKEEWAEMGEWEKSRYRNVKRNYCALVAI	1/1:27:64	3e-26	AFRDISIYFSKEEWAEMGEWEKSRYRNVKRNYCALVAI
109	PRDM9 ortho		XP_011961597	oari	Ovis aries	Sheep	Mammalia	LOW QUALITY PROTEIN: histone-lysine N-methyltransferase PRDM9-like	MSPNRSPEKSTEGDAGRTEWKPMVRDAFKDISIYFTKEEWAEMGEWEKVQYRNVKRNYKALIAIGFRATQPAFMHHHRQVIKPQVDDTEDSEEEWTPRQQGKPSGMAFRGEPSKHQKRLSRGPLNKVSSLKKLPGAAKLLKKTGSKQAQKPVPPPREARTPGQHPRHKVELRRKETEVKRYSLRERKGHVYQEVSELQDDDYLYCEECQNFFIDSCAAHGPPTFVKDSAVEKGHANRSALTLPPGLSIRPSGIPEAGLGVWNEASDLPLGLHFGPYEGQVIYNEEASHSGYSWLVTKGRNSYEYVDGKDTSLANWMRYVNCARDDEEQNLVALQYHGQIFYRTCQVVRPGCELLVWYGDEYGEELGIKQDSRGKSKLSAQREPKPKIHPCASCSLSFSS…			PF01352 [KRAB]	PF09514 [SSXRD]		PF00096 [ZnF_C2H2]	1/1:25:64	6.9e-10	RDAFKDISIYFTKEEWAEMGEWEKVQYRNVKRNYKALIAI	1/1:27:64	1.4e-30	AFKDISIYFTKEEWAEMGEWEKVQYRNVKRNYKALIAI	1/1:27:64	9.1e-15	AFKDISIYFTKEEWAEMGEWEKVQYRNVKRNYKALIAI	1/1:27:64	1.7e-14	AFKDISIYFTKEEWAEMGEWEKVQYRNVKRNYKALIAI	1/1:27:64	6.4e-26	AFKDISIYFTKEEWAEMGEWEKVQYRNVKRNYKALIAI
110	PRDM9 ortho		1269289_OARIE	oari	Ovis aries	Sheep	Mammalia		MRGPKPRDPGAPRLEKAGRTPPGASGGTSALHHLGLRCLGGRPEIPSALRNPSPNLKEACVSSASGTTSPFTRRNTESPSAVIFKYQSTLALSAPMATRPNRSPEESTEGDAGRTEWKPTAKDAFKDISVYFSKEEWEEMGEWEKIRYRNVKRNYEALIAIGFRATQPAFMHHRRQVIKLQVDDTEDSDEEWTPRQQGKPSMAFRVEHNKHQKAMSRAPLSMESSLKELPGAAKLLKTSGSKQAQKPVPPPRKARIPGQHPRQKVERKKMETGVKRYSLRERKGHVYQEVSEPQDDDYLYCEECQNFFINSCAAHGPPTFVKDCAVEKGHANRSALTLPPGLSIRLSGIPEAGLGVWNEASDLPLGLHFGPYEGQITDDEEAANSGYSWL		IPR003655 [KRAB-related]	IPR001909 [KRAB]	IPR019041 [SSXRD]			1/1:122:161	5.3e-10	KDAFKDISVYFSKEEWEEMGEWEKIRYRNVKRNYEALIAI	1/1:124:161	2.4e-31	AFKDISVYFSKEEWEEMGEWEKIRYRNVKRNYEALIAI	1/1:124:161	1.4e-16	AFKDISVYFSKEEWEEMGEWEKIRYRNVKRNYEALIAI	1/1:124:161	1.8e-14	AFKDISVYFSKEEWEEMGEWEKIRYRNVKRNYEALIAI	1/1:124:161	1.2e-27	AFKDISVYFSKEEWEEMGEWEKIRYRNVKRNYEALIAI
111	PRDM9 ortho		XP_004022816	oari	Ovis aries	Sheep	Mammalia	PREDICTED: probable histone-lysine N-methyltransferase PRDM7-like [Ovis aries]	MATRPNRSPEESTEGDAGRTEWKPTAKDAFKDISVYFSKEEWEEMGEWEKIRYRNVKRNYEALIAIGFRATQPAFMHHRRQVIKLQVDDTEDSDEEWTPRQQGKPSMAFRVEHNKHQKAMSRAPLSMESSLKELPGAAKLLKTSGSKQAQKPVPPPRKARIPGQHPRQKVERKKMETGVKRYSLRERKGHVYQEVSEPQDDDYLYCEECQNFFINSCAAHGPPTFVKDCAVEKGHANRSALTLPPGLSIRLSGIPEAGLGVWNEASDLPLGLHFGPYEGQITDDEEAANSGYSWLVRNTPVSLFSGLELLVCGGGYLMSTCKNAGGDDTVSNDTGSPVYCVHWA			PF01352 [KRAB]	PF09514 [SSXRD]			1/1:27:66	5.3e-10	KDAFKDISVYFSKEEWEEMGEWEKIRYRNVKRNYEALIAI	1/1:29:66	2.4e-31	AFKDISVYFSKEEWEEMGEWEKIRYRNVKRNYEALIAI	1/1:29:66	1.4e-16	AFKDISVYFSKEEWEEMGEWEKIRYRNVKRNYEALIAI	1/1:29:66	1.8e-14	AFKDISVYFSKEEWEEMGEWEKIRYRNVKRNYEALIAI	1/1:29:66	1.2e-27	AFKDISVYFSKEEWEEMGEWEKIRYRNVKRNYEALIAI
112	PRDM9 ortho		XP_012021514	oarim	Ovis aries musimon	european mouflon	Mammalia	PREDICTED: LOW QUALITY PROTEIN: histone-lysine N-methyltransferase PRDM9-like	MSPNRSPEKSTEGDAGRTEWKPMVRDAFKDISIYFTKEEWAEMGEWEKVQYRNVKRNYKALIAIGFRATQPAFMHHHRQVIKPQVDDTEDSEEEWTPRQQGKPSGMAFRGEPSKHQKRLSRGPLNKVSSLKKLPGAAKLLKKTGSKQAQKPVPPPREARTPGQHPRHKVELRRKETEVKRYSLRERKGHVYQEVSELQDDDYLYCEECQNFFIDSCAAHGPPTFVKDSAVEKGHANRSALTLPPGLSIRPSGIPEAGLGVWNEASDLPLGLHFGPYEGQVIYNEEASHSGYSWLVTKGRNSYEYVDGKDTSLANWMRYVNCARDDEEQNLVALQYHGQIFYRTCQVVRPGCELLVWYGDEYGEELGIKQDSRGKSKLSAQREPKPKIHPCASCSLSFSS…							1/1:25:64	6.9e-10	RDAFKDISIYFTKEEWAEMGEWEKVQYRNVKRNYKALIAI	1/1:27:64	1.4e-30	AFKDISIYFTKEEWAEMGEWEKVQYRNVKRNYKALIAI	1/1:27:64	9.1e-15	AFKDISIYFTKEEWAEMGEWEKVQYRNVKRNYKALIAI	1/1:27:64	1.7e-14	AFKDISIYFTKEEWAEMGEWEKVQYRNVKRNYKALIAI	1/1:27:64	6.4e-26	AFKDISIYFTKEEWAEMGEWEKVQYRNVKRNYKALIAI
113	PRDM9 ortho		XP_014946488	Oarim	Ovis aries musimon	european mouflon	Mammalia	histone-lysine N-methyltransferase PRDM9-like isoform X2	MAMKLNRSPEESTEGDVGRTEWKPMAKDAFKDISVYFSKEEWEEMGEWEKIRYRNVKRNYEALIAIGFRATRPAFMHHRRQVIKLQVDDTEDSDEEWTPRQQGKPSMAFRVEHNKHQKAMSRAPLSMESSLKELPGAAKLLKTSGSKQAQKPVPPPRKARIPGQHPRQKVERKKMETGVKRYSLRERKGHVYQEVSEPQDDDYLYCEECQNFFINSCAAHGPPTFVKDCAVEKGHANRSALTLPPGLSIRLSGIPEAGLGVWNEASDLPLGLHFGPYEGQITDDEEAANSGYSWLITKGRNCYEYVDGKDTSLANWMRYVNCARDDEEQNLVALQYQGQIFYRTCQVVRPGCELLVWYGDEYGQDLGIKRNSSGKSELAAGREPKPEIHPCAFCSLAFS…							1/1:27:66	5.3e-10	KDAFKDISVYFSKEEWEEMGEWEKIRYRNVKRNYEALIAI	1/1:29:66	2.4e-31	AFKDISVYFSKEEWEEMGEWEKIRYRNVKRNYEALIAI	1/1:29:66	1.4e-16	AFKDISVYFSKEEWEEMGEWEKIRYRNVKRNYEALIAI	1/1:29:66	1.8e-14	AFKDISVYFSKEEWEEMGEWEKIRYRNVKRNYEALIAI	1/1:29:66	1.2e-27	AFKDISVYFSKEEWEEMGEWEKIRYRNVKRNYEALIAI
114	PRDM9 ortho		XP_019268410	ppar	Panthera pardus	leopard	Mammalia	PREDICTED: probable histone-lysine N-methyltransferase PRDM7 isoform X1	MPHPNGENRHGSGQWSALSPPVSTFSFHRCLGLRTKRLMEPLPASESERGQPGGPSTTSPVGFPEQSTERSSRKARWKPTAKDAFKDISIYFSKEEWTEMGDWEKIRYRNVKRNYEALMTIGLRAPRPAFMCHRRQAIKPQVDDTEDSDEEWTPRQQAKPSWVASRVDQNKQHKGTHRVPLSKESSLKEFSETAKLLNTSGSEQGQKPVSLPGEASTSGHHSRRKLELRRKEIGVKMYSLRERKGFAYQEVSEPQDDDYLYCEKCQNFFIDSCTVHGPPTFVKDNAVGKGHPNRSALTLPPGLRIRPSSIPEAGLGVWNEASDLPLGTHFGPYEGQITEDEEAANSGYSWLITKGRNCYEYVDGKDNSWANWMRYVNCARDDEEQNLVAFQYHRQIFYR…							1/1:82:121	3.5e-09	KDAFKDISIYFSKEEWTEMGDWEKIRYRNVKRNYEALMTI	1/1:84:121	7.2e-31	AFKDISIYFSKEEWTEMGDWEKIRYRNVKRNYEALMTI	1/1:84:121	1.4e-15	AFKDISIYFSKEEWTEMGDWEKIRYRNVKRNYEALMTI	1/1:84:121	3.8e-14	AFKDISIYFSKEEWTEMGDWEKIRYRNVKRNYEALMTI	1/1:84:121	1.1e-26	AFKDISIYFSKEEWTEMGDWEKIRYRNVKRNYEALMTI
115	PRDM9 ortho		XP_007091171	ptig	Panthera tigris altaica	Siberian tiger	Mammalia	probable histone-lysine N-methyltransferase PRDM7	MPMSTLKPCRQLNAPNSACAAGRPAQSPARRVLHQPLIGGSCLTGRYKRVSRPPLCPDSHPAHSARRLSSGRQIRVGNARGRAKDAFKDISIYFSKEEWTEMGDWEKIRYRNVKRNYEALMTIGLRAPRPAFMCHRRQAIKPQVDDTEDSDEEWTPRQQVKPSWVASRVDQNKQHKGTHRVPLSKESSLKEFSETAKLLNTSGSEQGQKPVSLPGEASTSGHHSRRKLELRRKEIGVKMYSLRERKGFAYQEVSEPQDDDYLYCEKCQNFFTDSCAVHGPPTFVKDNAVGRGHPNRSALTLPPGLRIRPSSIPEAGLGVWNEASDLPLGTHFGPYEGQITEDEEAANSGYSWLITKGRNCYEYVDGKDNSWANWMRYVNCARDDEEQNLVAFQYHRQIF…							1/1:84:123	3.5e-09	KDAFKDISIYFSKEEWTEMGDWEKIRYRNVKRNYEALMTI	1/1:86:123	7.2e-31	AFKDISIYFSKEEWTEMGDWEKIRYRNVKRNYEALMTI	1/1:86:123	1.4e-15	AFKDISIYFSKEEWTEMGDWEKIRYRNVKRNYEALMTI	1/1:86:123	3.8e-14	AFKDISIYFSKEEWTEMGDWEKIRYRNVKRNYEALMTI	1/1:86:123	1.1e-26	AFKDISIYFSKEEWTEMGDWEKIRYRNVKRNYEALMTI
116	PRDM9 ortho		XP_015850388	pman	Peromyscus maniculatus bairdii	prairie deer mouse	Mammalia	PREDICTED: histone-lysine N-methyltransferase PRDM9-like isoform X4	MSCTMSTNKLEENSPEGDAGRLEWKPKVKDEFKDISMYFSKEEWAEMGEWEKIRYRNVKRNYKMLISIGLRAPRPAFMCYQRQRIKPQIDDSEDSDEEWTPKQQGSPSWVPFRVKHTKQQKGAPRMFLNDESNVKEVSGIENLLNTSGSEHPQKPVSSPGEGNASGQHSEQKPSKKLRKKNVEVKMYSLRERKGLAYKEISEPQDDDYLYCEKCQNFFINSCPNHGPPIFIKDSMVERGHPNHSVLSLPHGLRIGSSGIPEAGLGVWNEASDLPVGLHFGPYKGQITEDEEAANSGYSWLITKGRNCYEYVNGQDESQANWMRYVNCARDDEEQNLVAFQYHRQIFYRTCRVIRPGCELLVWYGDEYGQELGIQWGSKRKNGFTTGKGYGEML							1/1:29:68	1.6e-09	KDEFKDISMYFSKEEWAEMGEWEKIRYRNVKRNYKMLISI	1/1:31:68	5.3e-30	EFKDISMYFSKEEWAEMGEWEKIRYRNVKRNYKMLISI	1/1:31:68	4.5e-15	EFKDISMYFSKEEWAEMGEWEKIRYRNVKRNYKMLISI	1/1:31:68	6.4e-15	EFKDISMYFSKEEWAEMGEWEKIRYRNVKRNYKMLISI	1/1:31:68	1.3e-26	EFKDISMYFSKEEWAEMGEWEKIRYRNVKRNYKMLISI
117	PRDM9 ortho		XP_020832688	pcin	Phascolarctos cinereus	Koala	Mammalia	histone-lysine N-methyltransferase PRDM9 isoform X2	MSRDSSPDGSPEEDEGEKGGPRCQGEDTFKDISTYFSKKQWVELREWEKVRLKNIKQNYEAMIKIGLSAPRPAFMCRQNKRAKVEESGDSDEEWIPKQLVKTLRFPSRVKQRTHLRNEEMAKELADPKAEGMMDLSEELKTVVMNNLTISEIKKQMGQMDGSCTTNQLTEGKLECRRKEAEVHMYNLRERKYQVYQEIWDPQDDDYLFCEECQTFFLETCAVHGPPKFVQDSAMVKGHPYCSVITLPPGLRIGLSGIPGAGLGIWNEASNLPLGLHFGPYKGQMTEDDEAANSGYSWMITKGRNCYEYVDGKEESCSNWMRYVNCARDEEEQNLVAFQYRRQIFYRTCQVIRPGCELLVWYGDEYGQELGIKWGSKWKRPLTALTGESPGIYLCPSCPL…							1/1:26:65	2.9e-05	EDTFKDISTYFSKKQWVELREWEKVRLKNIKQNYEAMIKI	1/1:28:65	1.8e-26	TFKDISTYFSKKQWVELREWEKVRLKNIKQNYEAMIKI	1/1:28:65	2.1e-13	TFKDISTYFSKKQWVELREWEKVRLKNIKQNYEAMIKI	1/1:28:65	5.6e-13	TFKDISTYFSKKQWVELREWEKVRLKNIKQNYEAMIKI	1/1:28:65	4.4e-23	TFKDISTYFSKKQWVELREWEKVRLKNIKQNYEAMIKI
118	PRDM9 ortho		XP_028385101	pdis	Phyllostomus discolor	pale spear-nosed bat	Mammalia	LOW QUALITY PROTEIN: probable histone-lysine N-methyltransferase PRDM7	MNPYRGRRSTLREKQEHWWKRRDSLSQGRSGSFGEVGEGPECEQAPGTHPRGTATRAEEALEDVSLYFSREEWAEMGDWQKARYRNLKRNFYMLLRLGLRAPQPAFMCHHRRQATQLQEEDPEDSDEERAPRQQAEPWVAFRKEQSKHRKATSRVPLSNEYRLKELSGTANLMTATDSEHAQKPVSPPGEACAFEKHTRQILELRGKEIDVKMYSLPERKDCVYQEVTEPQDDDYLYCEKCQNFFINNCAVHGPPTFVKDSAVDKGHPQHSALTLPPGLRIGPSGIPEAGLRVWNEAADLPVGLHFGHPYEGHITEDEEAAKSRYSWLITKGXNCYEYVDGKDRSWANWMRYVNCAQDDEEQNLVAFQYHRQIFYKTCQDIRPGCELLVWYVDEYGQEL…							1/1:58:97	9.4e-08	EEALEDVSLYFSREEWAEMGDWQKARYRNLKRNFYMLLRL	1/1:60:97	1.4e-23	ALEDVSLYFSREEWAEMGDWQKARYRNLKRNFYMLLRL	1/1:60:97	7.1e-12	ALEDVSLYFSREEWAEMGDWQKARYRNLKRNFYMLLRL	1/1:60:97	8.3e-11	ALEDVSLYFSREEWAEMGDWQKARYRNLKRNFYMLLRL	1/1:60:97	9.7e-21	ALEDVSLYFSREEWAEMGDWQKARYRNLKRNFYMLLRL
119	PRDM9 ortho		XP_028381088	pdis	Phyllostomus discolor	pale spear-nosed bat	Mammalia	probable histone-lysine N-methyltransferase PRDM7	MALALSPDPEARLPGSPAAAQQQHQGPGIPPLIGGLLPRGYRGRNLTPAPSVLRRAREAREPGEHPPLRWAARQGPRETGRRRSSPEGPRASQPERRRSACRTLRLRLVQASPDPGGASGPFPGRSAFLRRHRPAGPAPGTPGWDTMNPYGGPQERPEGEAGRTGWTSQAEEALKDTSLYFSREEWAEMGDWEKGRYRNVKRNFEVLLSLGFRPPRPAFMGHHHRQATQLQEEDREDSDEERAPRQQVIPCVAFRKEQSKHQTATSRIPLRNEYNLKELSGIANLMTTSDSEHAQKPVSPPGEACAFAKRTRRKSELRTKEMDVKMYNLRERKGRVYQEVTGPQDDDYLYCEKCQNFFIDSCAVHGPPTFVKDSAVDKGHPHRSALTLPPGLRIGPSGI…							1/1:171:210	2e-07	EEALKDTSLYFSREEWAEMGDWEKGRYRNVKRNFEVLLSL	1/1:173:210	2.6e-27	ALKDTSLYFSREEWAEMGDWEKGRYRNVKRNFEVLLSL	1/1:173:210	6.4e-12	ALKDTSLYFSREEWAEMGDWEKGRYRNVKRNFEVLLSL	1/1:173:210	2.7e-12	ALKDTSLYFSREEWAEMGDWEKGRYRNVKRNFEVLLSL	1/1:173:210	6.1e-23	ALKDTSLYFSREEWAEMGDWEKGRYRNVKRNFEVLLSL
120	PRDM9 ortho		XP_028359111	pdis	Phyllostomus discolor	pale spear-nosed bat	Mammalia	histone-lysine N-methyltransferase PRDM9-like	MPAMKPPMDKSEDSSEEWTPRQQAPGPPGPRGWKTTDPKSVPQYKTEGKREIRGRSRSVQWVSGRTGFVVTEQCKINWDKALSVLRDRLPGPVSSTWVDNTFKDISIYFTRGEWEVMGDWEKSQYRNVKRSYCGFISRGFCFFPCLRAPQAAFMCQRMPATKPPMDKSEDSDEEWTPRQQGEEKSPPWILMQVRHSYQRKATSRTPLNNESSVKELCRRANMLTESDSDQGQDPVCPPGEGSTSGEHSRQELELRRNDIDVKTYSLRKRKDLVYQEVNEPQDDDYIYCEECRDLCIDSCPVHGPLTFIKDNAVDLGHPNRADLTLPPGLRIGPSGIPDAGIGVWNEASDLPVGLCFGPYEGQITEDKEACKSGYSWVITKGRKCCGYVDGKDKSRSNWM…							1/1:99:138	8e-07	DNTFKDISIYFTRGEWEVMGDWEKSQYRNVKRSYCGFISR	1/1:101:138	6e-23	TFKDISIYFTRGEWEVMGDWEKSQYRNVKRSYCGFISR	1/1:101:138	6.3e-10	TFKDISIYFTRGEWEVMGDWEKSQYRNVKRSYCGFISR	1/1:101:138	4.7e-13	TFKDISIYFTRGEWEVMGDWEKSQYRNVKRSYCGFISR	1/1:101:138	4.7e-21	TFKDISIYFTRGEWEVMGDWEKSQYRNVKRSYCGFISR
121	PRDM9 ortho		XP_028375311	pdis	Phyllostomus discolor	pale spear-nosed bat	Mammalia	LOW QUALITY PROTEIN: probable histone-lysine N-methyltransferase PRDM7	MEGSRRRLGILTTVRWNKDTLSGGRRATSTLQTDLGSELPDPAGRVPHQTLENYPHRGGLTPSLRDAVCPPLGRRRSSPEGPRASQPERRRSACRTLRLRLARASPDPRGASEPFPALRTRGSDTMNPDGDPQERPEGGAGWTPQAEATLEGAALHFSREQWAEVEDGEKGRYRDVKRNSDALASPGLGAPPPAFLCHRCKWATELQEGDREDSDEERAPRQQGATDPGRDAMSLDREPQERPEGNAGRPGRAAQADDAFKDIAVYFSRADWAAMGAWEKGRYRNVKSNYEVLLGLGLRAPRPAFRRRRRRAAAPWAAASDDXDEEWTPRQRVKPSWVAFRGEQSKHHKAMSRPSLSNESSLKELSRTANLLTASDSEQAQKPLSPPAEASASGEHIRE…							2/2:257:296	2.1e-08	DDAFKDIAVYFSRADWAAMGAWEKGRYRNVKSNYEVLLGL	2/2:259:296	4e-25	AFKDIAVYFSRADWAAMGAWEKGRYRNVKSNYEVLLGL	2/2:259:296	9.5e-13	AFKDIAVYFSRADWAAMGAWEKGRYRNVKSNYEVLLGL	2/2:259:296	5.8e-12	AFKDIAVYFSRADWAAMGAWEKGRYRNVKSNYEVLLGL	2/2:259:296	1.2e-21	AFKDIAVYFSRADWAAMGAWEKGRYRNVKSNYEVLLGL
122	PRDM9 ortho	PRDM7	XP_028333357	pcat	Physeter catodon	sperm whale	Mammalia	probable histone-lysine N-methyltransferase PRDM7	PEGDAGSTECKATAKDAFKDISIYFSKEEWTEMGEWEKIRYRNVKKNYEALITIGLRAPRPAFMCHRRQAVKPQVDDPEDSDEEWTPRHQVKPSCVAFRVEHSKHQKVMPPVPLSNESSLKKLPGAAQLQKASGPAQAQSPAPPPRATSTSARHARQKLERRTKQIEVKMYSLRERKGHVYQEISEPQDDDYLYCEKCQNFFIDSCAAHGAPTFVKDSAVEKGRPNRSALTLPPGLSIRPSGIPEAGLGVWNEASDLPLGVHFGPYEGQITEDEEAANSGYSWLITKGRNCYEYVDGKDKSWANWMRYVNCARDDEEQNLVAFQYHRQIFYRTCRVVRPGCELLVWYGEEYSEELGIKWASRAQSELAAGRDPKPKIHPCGSCSLAFASPKILSQHVER…			PF01352 [KRAB]	PF09514 [SSXRD]	PF00856 [SET]	PF00096 [ZnF_C2H2]	1/1:15:54	1.7e-09	KDAFKDISIYFSKEEWTEMGEWEKIRYRNVKKNYEALITI	1/1:17:54	8.5e-31	AFKDISIYFSKEEWTEMGEWEKIRYRNVKKNYEALITI	1/1:17:54	5.3e-15	AFKDISIYFSKEEWTEMGEWEKIRYRNVKKNYEALITI	1/1:17:54	3.1e-14	AFKDISIYFSKEEWTEMGEWEKIRYRNVKKNYEALITI	1/1:17:54	6.7e-26	AFKDISIYFSKEEWTEMGEWEKIRYRNVKKNYEALITI
123	PRDM9 ortho	-	L5KDB7	pale	Pteropus alecto	Black flying fox	Mammalia	Histone-lysine N-methyltransferase PRDM9	MRPDRSPEESPVGDTRRLGRKPKSKDAFKDVSIHFSKEEWTEMGDLEKIRSKNMKRNYDTLQAIGLRAPRPAFTCHRRKAVKPQVDNIEDSDEEWTPRHQREGPGGVRELRRKGTEVKMYSLRERTGHVYQEVSEPQDDDYLYCEKCQNFFVDSCTAHGPPTFVKDSKVDMGHPNRSALTLPPGLRIGPSGIPEAGLGVWNEASDLPLGLLFGPYEGQVTEDAEAANSGYSWLITKARNCYEYVDGKDESRANWMRYVNCARDDEEQNLLAFQYHRQIFYRTCRVIRPGCELLVWYGDEYGQKLGITWGSKKKRKLVSGGESKTEIHPCPSCSLAFSSQKLLHQHVEHSHLSQNPPGTPARKQPQLEEPCPESQNQQQEQHTDPHSWNDKAQGQEVKEK…			PF01352 [KRAB]	PF09514 [SSXRD]	PF00856 [SET]	PF00096 [ZnF_C2H2]	1/1:25:64	2e-06	KDAFKDVSIHFSKEEWTEMGDLEKIRSKNMKRNYDTLQAI	1/1:27:64	1.8e-25	AFKDVSIHFSKEEWTEMGDLEKIRSKNMKRNYDTLQAI	1/1:27:64	1.7e-13	AFKDVSIHFSKEEWTEMGDLEKIRSKNMKRNYDTLQAI	1/1:27:64	1.4e-09	AFKDVSIHFSKEEWTEMGDLEKIRSKNMKRNYDTLQAI	1/1:27:64	5.3e-22	AFKDVSIHFSKEEWTEMGDLEKIRSKNMKRNYDTLQAI
124	PRDM9 ortho		XP_011377426	pvam	Pteropus vampyrus	arge flying fox	Mammalia	LOW QUALITY PROTEIN: probable histone-lysine N-methyltransferase PRDM7	MMPDRSPEEAPEGDTRRTGCKPKVRDAFKDISIYFSKEEWTEMGDWEKIRYRNVKRNYDALQAIGNKKFCFSPVLRAPRPAFMCRRRQAIKPQVDDSVDSDEEWTQRQQGQPSWVAFGVEQSKHQKAMPRVPLSNESSLKELSVIANPLKASGSEQNQQPVFPPGKASASRQHSRRKLGLRRKGVEVKMDSLRERMGRVYQEVSEPQDDDYLYCEKCQNFFIDSCAAHGSPIFVKDSEVDIGHPNHSALTLPPGLRIGPSGIPEAGLGVWNEASNLPLGLLFGPYEGQVTEDEEAANSKYSXMITKGRNCXEYVDGKDESRANWMRYVNCARDDEDQNLVAFQFRRQIFYRTCRVIMPGCELLVWYGDEYGQGLGIKWGSKWKREFTAGRGGYRGSSDG…							1/1:25:64	2.9e-08	RDAFKDISIYFSKEEWTEMGDWEKIRYRNVKRNYDALQAI	1/1:27:64	6.6e-31	AFKDISIYFSKEEWTEMGDWEKIRYRNVKRNYDALQAI	1/1:27:64	1.4e-15	AFKDISIYFSKEEWTEMGDWEKIRYRNVKRNYDALQAI	1/1:27:64	3.1e-14	AFKDISIYFSKEEWTEMGDWEKIRYRNVKRNYDALQAI	1/1:27:64	3.5e-27	AFKDISIYFSKEEWTEMGDWEKIRYRNVKRNYDALQAI
125	PRDM9 ortho		XP_025776631	pcon	Puma concolor	cougar	Mammalia	probable histone-lysine N-methyltransferase PRDM7	MPMSTLKPCRQLNAPNSACAAGRPAQSPALRVLHQGLRVKRGGCLGLRTKRLMEPLPASESERGQPGGPSTTSPLRFPEQSTERSSRKARWKPTAKDAFKDISIYFSKEEWTEMGDWEKIRYRNVKRNYEALMTIGLRAPRPAFMCHRRQAIKPQVDDTEDSDEEWTPRQQVRPSWVASRVDQNKQHKGTHRVPLSKESSLKEFSETAKLLNTSGSEQGQKPVSLPGEASTSGHHSRRKLELRRKEIGVKMYSLRERKGFAYQEVSEPQDDDYLYCEKCQNFFIDSCAVHGPPTFVKDNAVGKGHPNRSALTLPPGLRIRPSSIPEAGLGVWNEASDLPLGTHFGPYEGQITEDEEAANSGYSWLITKGRNCYEYVDGKDNSWANWMRYVNCARDDEEQ…							1/1:96:135	3.5e-09	KDAFKDISIYFSKEEWTEMGDWEKIRYRNVKRNYEALMTI	1/1:98:135	7.2e-31	AFKDISIYFSKEEWTEMGDWEKIRYRNVKRNYEALMTI	1/1:98:135	1.4e-15	AFKDISIYFSKEEWTEMGDWEKIRYRNVKRNYEALMTI	1/1:98:135	3.8e-14	AFKDISIYFSKEEWTEMGDWEKIRYRNVKRNYEALMTI	1/1:98:135	1.1e-26	AFKDISIYFSKEEWTEMGDWEKIRYRNVKRNYEALMTI
126	PRDM9 ortho	PRDM9	NP_001102373	rnor	Rattus norvegicus	Rat	Mammalia	histone-lysine N-methyltransferase PRDM9 [Rattus norvegicus]	MSRTMNTNKPEENSTEGDAGKLEWKPKVKDEFKDISIYFSKEEWAEMGEWEKIRYRNVKRNYKMLISIGLRAPRPAFMCYQRQAIKPQINDNEDSDEEWTPKQQVSSPWVPFRVKHSKQQKETPRMPLSDKSSVKEVFGIENLLNTSGSEHAQKPVCSPEEGNTSGQHFGKKLKLRRKNVEVNRYRLRERKDLAYEEVSEPQDDDYLYCEKCQNFFIDSCPNHGPPVFVKDSVVDRGHPNHSVLSLPPGLRIGPSGIPEAGLGVWNEASDLPVGLHFGPYKGQITEDEEAANSGYSWLITKGRNCYEYVDGQDESQANWMRYVNCARDDEEQNLVAFQYHRKIFYRTCRVIRPGRELLVWYGDEYGQELGIKWGSKMKKGFTAGRELRTEIHPCFLCSL…			PF01352 [KRAB]	PF09514 [SSXRD]	PF00856 [SET]	PF00096 [ZnF_C2H2]	1/1:29:68	4.4e-10	KDEFKDISIYFSKEEWAEMGEWEKIRYRNVKRNYKMLISI	1/1:31:68	1.4e-30	EFKDISIYFSKEEWAEMGEWEKIRYRNVKRNYKMLISI	1/1:31:68	5.5e-15	EFKDISIYFSKEEWAEMGEWEKIRYRNVKRNYKMLISI	1/1:31:68	1.8e-14	EFKDISIYFSKEEWAEMGEWEKIRYRNVKRNYKMLISI	1/1:31:68	2.3e-26	EFKDISIYFSKEEWAEMGEWEKIRYRNVKRNYKMLISI
127	PRDM9 ortho		XP_023355772	shar	Sarcophilus harrisii	Tasmanian devil	Mammalia	histone-lysine N-methyltransferase PRDM9-like	AEEDSFKDISMYFSKKQWMELRDWEKVRFKNVKRNYEAMIKIGLTASRPTFMCRGKQNRRAKVEESGDSDEEWMPKQLVKASRFSSRLKQKTHLRNKEMTKELTDAKMKGTVDLSEELKIVVMNNVTNSEEVKKQECRKKDAAVHIYNLRERKYPIYQEIWDPQDDDYLFCEECQTFFLETCAVHGPPKFVQDGAMIKGYPYCSAITLPPGLRIGLSGIPNAGLGVWNEGSNLPMGLHFGPYEGKSTEDDEAANSGYSWMITKGRNSYEYVDGKEESCSNWMRYVNCAREEEEQNLVAFQYQRQIFYRTCRVIRPGCELLVWYGDEYGQELGIKWGRKWKRPLTGITDFSTHAFLSQQVPKQPSQGFLDSTTGSHGLGNLHPDQLLPPGYSCVSDKAET…							1/1:3:42	6.5e-06	EDSFKDISMYFSKKQWMELRDWEKVRFKNVKRNYEAMIKI	1/1:5:42	1.7e-26	SFKDISMYFSKKQWMELRDWEKVRFKNVKRNYEAMIKI	1/1:5:42	9.4e-14	SFKDISMYFSKKQWMELRDWEKVRFKNVKRNYEAMIKI	1/1:5:42	8.6e-14	SFKDISMYFSKKQWMELRDWEKVRFKNVKRNYEAMIKI	1/1:5:42	9.6e-24	SFKDISMYFSKKQWMELRDWEKVRFKNVKRNYEAMIKI
128	PRDM9 ortho		XP_004600846	sara	Sorex araneus	Eurasian common shrew	Mammalia	PREDICTED: probable histone-lysine N-methyltransferase PRDM7, partial [Sorex araneus]	SKDAFKDISMYFSKEEWAEMGDWEKIRHRNVKRNYEELISIGLRAARPAFMSHRRQAIKTQLDDTEESDEEWTPNQQVKSLRVAFRAEQSKHQKGRSRTPISNESSSKELSGTRTLLNTKCTKQAQKPLFPPGEASTSGHYSKPKLELRRKEPEVKMYSLRERKGRAYQEVSEPQDDDYLYCENCQNFFINKCSAHGSPIFVKDNAVAKGHSNRSALTLPHGLRIGPSGIPEAGLGIWNEASDLPLGLHFGPYEGQITNDEEAANSGYSWLITKGRNCYEYVDGVDESLANWMRYVNCARDYEEQNLVAFQYHRQIFYRTCRIIKPGCELLVWYGDEYGQELGIKWGSKWKSELTADKDLCSGQNQSQRSIRVPAALSPSLIRNSSVVTWNTVIPL							1/1:2:41	2e-08	KDAFKDISMYFSKEEWAEMGDWEKIRHRNVKRNYEELISI	1/1:4:41	4.6e-30	AFKDISMYFSKEEWAEMGDWEKIRHRNVKRNYEELISI	1/1:4:41	4.4e-15	AFKDISMYFSKEEWAEMGDWEKIRHRNVKRNYEELISI	1/1:4:41	3.2e-14	AFKDISMYFSKEEWAEMGDWEKIRHRNVKRNYEELISI	1/1:4:41	6.5e-27	AFKDISMYFSKEEWAEMGDWEKIRHRNVKRNYEELISI
129	PRDM9 ortho	-	A0A484GXT8	schi	Sousa chinensis	Indo-Pacific humpback dolphin	Mammalia	Uncharacterized protein	GPRPMSTDRWPEDSTEGEAGGTAWKPTAKDAFKDISIYFSKEEWTEMGEWEKIRYRNVKKNYEALVTLGLRAPRPAFMCHRRQAIKAQVGDPEDSDEEWTPRQQGEGPGRFRGVFLKTTWAVPPVPLSNESSLKKLPGAAQLQKASGPAQAQSPAPPPGAASTSAWHTRQKLERRAKQIEVKMYSLRERKGHVYQEVSEPQDDDYLYCEKCQNFFIDSCAAHGAPTFVKDSAVEKGHPNRSALTLPPGLSIRPSGIPEAGLGVWNEASDLPLGLHFGPYEGQITEDEEAANSGYSWLITKGRNCYEYVDGKDTSWANWMRYVNCARDEEEQNLVAFQYHRQIFYRTCRVVRPGCELLVWYGDEYSQELGIPWGSGWKSQLLPLSADPKPKIQPCGSCSL…			PF01352 [KRAB]	PF09514 [SSXRD]	PF00856 [SET]	PF00096 [ZnF_C2H2]	1/1:29:68	1.6e-10	KDAFKDISIYFSKEEWTEMGEWEKIRYRNVKKNYEALVTL	1/1:31:68	2.1e-30	AFKDISIYFSKEEWTEMGEWEKIRYRNVKKNYEALVTL	1/1:31:68	1.1e-15	AFKDISIYFSKEEWTEMGEWEKIRYRNVKKNYEALVTL	1/1:31:68	3.1e-14	AFKDISIYFSKEEWTEMGEWEKIRYRNVKKNYEALVTL	1/1:31:68	5e-26	AFKDISIYFSKEEWTEMGEWEKIRYRNVKKNYEALVTL
130	PRDM9 ortho	PRDM9	ENSSSCP00000023246	sscr	Sus scrofa	Pig	Mammalia	PREDICTED: histone-lysine N-methyltransferase PRDM9 [Sus scrofa]	TMRPDRRPEESPDPAAGSTERKAAATDAFKDISIYFSKEEWTEMGEWEKIRYRNVKRNYEALTTIGLRAPRPAFMCHRRQAIKPQVDDTEDSDEEWTPRQQVKPCRVAFRVEHNKHQKRVSRVPLSNKSSLKELLTTAEVPETSGSEQAQEPVSPPGEASTSRRRSGQELARRRKDTEARMYSLRERKGHAYQEVGEPQDDDYLYCEKCQNFFIDSCAAHGPPTFVKDSAVDKGHPNRSALTLPPGLRIRPSGIPEAGLGVWNEAHDLPLGLHFGPYEGQVTEDEEAANSGYSWLITKGRNCYEYVDGKDKSWANWMRYVNCARDDEEQNLVAFQYHRQIFYRTCRVVRPGCELLVWYGDEYGQELGIKWGSKWKKELTAGITAGPAEPKPKIHPCPSC…			PF01352 [KRAB]	PF09514 [SSXRD]	PF00856 [SET]	PF00096 [ZnF_C2H2]	1/1:26:65	2.3e-09	TDAFKDISIYFSKEEWTEMGEWEKIRYRNVKRNYEALTTI	1/1:28:65	2.9e-31	AFKDISIYFSKEEWTEMGEWEKIRYRNVKRNYEALTTI	1/1:28:65	1.8e-16	AFKDISIYFSKEEWTEMGEWEKIRYRNVKRNYEALTTI	1/1:28:65	1.8e-13	AFKDISIYFSKEEWTEMGEWEKIRYRNVKRNYEALTTI	1/1:28:65	7.2e-27	AFKDISIYFSKEEWTEMGEWEKIRYRNVKRNYEALTTI
131	PRDM9 ortho	PRDM9	A0A2Y9DPW2	tman	Trichechus manatus latirostris	Florida manatee	Mammalia	histone-lysine N-methyltransferase PRDM9	MSPARATEESPGGDARRTPTAKDAFRDISIYFSKEEWAEMGEWEKFRYRNVKRNYEALVAIGLRAPRPAFMCHRRQAIKAQVDDTEDSDEEWTPRQQVKPPWVVSRVEQSKHQKGTPRAPLNNESSLKEVSGTEILLSTAGSEQAQKLVSSPGEASTSDQHSRQKLEPRRKEVEVKMYSLRERKGLAYQEVAEPQDDDYLYCEKCQNFFIDACAVHGAPTFVKDSPADRGHPNRSALTLPPGLGIGPSGIPKAGLGVWNEASELPLGVHFGPYEGQVTEDEEAANSGYSWLITKGRNCYEYVDGKDESWANWMRYVNCARNEEEQNLVAFQYHRQIFYRTCSTIQPGCELLVWYGDEYGQELGIKWGSRWKKELTSGTEPKPEIHPCPSCPLAFSSQKF…			PF01352 [KRAB]	PF09514 [SSXRD]	PF00856 [SET]	PF00096 [ZnF_C2H2]	1/1:22:61	5.2e-10	KDAFRDISIYFSKEEWAEMGEWEKFRYRNVKRNYEALVAI	1/1:24:61	6.4e-31	AFRDISIYFSKEEWAEMGEWEKFRYRNVKRNYEALVAI	1/1:24:61	3.6e-15	AFRDISIYFSKEEWAEMGEWEKFRYRNVKRNYEALVAI	1/1:24:61	8e-14	AFRDISIYFSKEEWAEMGEWEKFRYRNVKRNYEALVAI	1/1:24:61	3.5e-26	AFRDISIYFSKEEWAEMGEWEKFRYRNVKRNYEALVAI
132	PRDM9 ortho	-	L9KKY7	tchi	Tupaia chinensis	Chinese tree shrew	Mammalia	Histone-lysine N-methyltransferase PRDM9	MSGPRPELAGLQDRTEKSHPGTNFQPPGMRAQTGRLRLRQRHRRGRQGDGDSGLTVIPLALTPQDCPKHPQPQPAAPLSPRAKLHTGIMRRYKSPEESPEGDAGRTEWKPTVKDAFKDISVYFSKEEWAQMGEWEKIRYRNVKRNYTTLIAIGLRAPRPAFMCHRKLAVKPHMDDAEDSDEEWTPRQQEVRRKETKVKMYSLRERKCGTYKEVHEPQDDDYLYCEKCQNFFIDSCSAHGPPIFVKDSAVDKGSLNRSVLSLPPGLRIAPSGIPEAGLGVWNAATDLPLGLHFGPYEGQITEDEEAANSGYSWLITKGRNCYEYVDGKDESWANWMRYVNCARDDEEQNLVAFQYHRQIFYRTCRVIRPGCELLVWYGEEYGQELGIKWGSKWKKELVAR…			PF01352 [KRAB]	PF09514 [SSXRD]	PF00856 [SET]	PF00096 [ZnF_C2H2]	1/1:113:152	2.2e-10	KDAFKDISVYFSKEEWAQMGEWEKIRYRNVKRNYTTLIAI	1/1:115:152	2e-30	AFKDISVYFSKEEWAQMGEWEKIRYRNVKRNYTTLIAI	1/1:115:152	2.4e-16	AFKDISVYFSKEEWAQMGEWEKIRYRNVKRNYTTLIAI	1/1:115:152	7.3e-14	AFKDISVYFSKEEWAQMGEWEKIRYRNVKRNYTTLIAI	1/1:115:152	4.4e-27	AFKDISVYFSKEEWAQMGEWEKIRYRNVKRNYTTLIAI
133	PRDM9 ortho		XP_004318641	ttru	Tursiops truncatus	Dolphin	Mammalia	PREDICTED: histone-lysine N-methyltransferase PRDM9-like, partial [Tursiops truncatus]	AKDAFKDISIYFSKEEWTEMGEWEKIRYRNVKKNYEALVTLGLRAPRPAFMCHRRQAIKAQVGDPEDSDEEWTPRQQVKPSWVAFRVEHSKHQKVMPPVPLSNESSLKKLPGAAQLQKASGPAQAQSPAPPPGAASTSAWHTRQKLERRAKQIEVKMYSLRERKGHVYQEVSEPQDDDYLYCEKCQNFFIDSCAAHGAPTFVKDSAVEKGHPNRSALTLPPGLSIRPSGIPEAGLGVWNEASDLPLGLHFGPYEGQITEDEEAANSGYSWLITKGRNCYEYVDGKDTSWANWMRYVNCARDEEEQNLVAFQYHRQIFYRTCRVVRPGCELLVWYGDEYSQELGIPWGSGWKSQLVAAGRDPKPKIQPCGSCSLAFSSQKILSQHVECSHPSQVLPRTSA…			PF01352 [KRAB]	PF09514 [SSXRD]	PF00856 [SET]	PF00096 [ZnF_C2H2]	1/1:2:41	1.6e-10	KDAFKDISIYFSKEEWTEMGEWEKIRYRNVKKNYEALVTL	1/1:4:41	2.1e-30	AFKDISIYFSKEEWTEMGEWEKIRYRNVKKNYEALVTL	1/1:4:41	1.1e-15	AFKDISIYFSKEEWTEMGEWEKIRYRNVKKNYEALVTL	1/1:4:41	3.1e-14	AFKDISIYFSKEEWTEMGEWEKIRYRNVKKNYEALVTL	1/1:4:41	5e-26	AFKDISIYFSKEEWTEMGEWEKIRYRNVKKNYEALVTL
134	PRDM9 ortho		XP_026237745	upar	Urocitellus parryii	Arctic ground squirrel	Mammalia	histone-lysine N-methyltransferase PRDM9-like	MVWHVVYQKSDSKLMFARHLDEDLEQVHRKQGRFPVLAVKERRLAGPHVRSADWQLYDSRHPSPLVGLRRPRLELRAWRQRLCKAEPAQRASCSTMSATDGSPDESTKGDLGRPERKPKVKDAFKDVSIYFSKEEWAEMGEWEKIRYRNVKRNYNMLISIGFRAPRPAFMCHQRQTIKLQMDDTEDSDEEWTPRQQVKPPWVASRVEQSKPQKGMPEVLLSNESSLKELSGTANLLNTSGSEQVQKPVSPLREASTSRQHSRRKLELRTKEVEVKMYSLRERKGHAYKEVSEPQDDDYLYCDKCQNFFIDSCPVHGPPTFIKDSVVNKDHSNHSTLSLPLGLRIGPSSIPEAGLGVWNEATDLPLGLHFGPYRGQITEDEEAANSGYSWLITKGRNCYE…							1/1:121:160	7.2e-11	KDAFKDVSIYFSKEEWAEMGEWEKIRYRNVKRNYNMLISI	1/1:123:160	3.8e-31	AFKDVSIYFSKEEWAEMGEWEKIRYRNVKRNYNMLISI	1/1:123:160	4e-15	AFKDVSIYFSKEEWAEMGEWEKIRYRNVKRNYNMLISI	1/1:123:160	1.2e-14	AFKDVSIYFSKEEWAEMGEWEKIRYRNVKRNYNMLISI	1/1:123:160	3.5e-27	AFKDVSIYFSKEEWAEMGEWEKIRYRNVKRNYNMLISI
135	PRDM9 ortho	-	A0A452RL13	uame	Ursus americanus	American black bear	Mammalia	Uncharacterized protein	MRTSPASESEQSLPGGPSTISLNTSPEETPERDSGRTGWKPTVRDAFKDISIYFSKEEWTEMGDWEKIRYRNVKRNYEALITIGLRAPRPAFMCHRRQAIKSQVDDTEDSDEEWTPRQQVRPSWVAFRMEQSKHQRGIPRAPLRNESTLKELSETAKLLNTSGSELGQKPVSLPGEASTSGHDSLQKLEFRRKDVEVKMYSLRERKSLAYQEVSEPQDDDYLYCEKCQNFFIDSCAVHGPPTFVKDSAVDKGQPNRSALTLPPGLRIRPSGIPQAGLGVWNEASDLPLGLHFGPYEGQITEDEEAANSGYSWLITKGRNCYEYVDGKDNSWANWMRYVNCARDEEEQNLVAFQYHRQIFYRTCRVIRPGCELLVWYGDEYGQELGIKWGSKWKSELTAG…			PF01352 [KRAB]	PF09514 [SSXRD]	PF00856 [SET]	PF00096 [ZnF_C2H2]	1/1:44:83	4e-09	RDAFKDISIYFSKEEWTEMGDWEKIRYRNVKRNYEALITI	1/1:46:83	4.9e-32	AFKDISIYFSKEEWTEMGDWEKIRYRNVKRNYEALITI	1/1:46:83	1.1e-15	AFKDISIYFSKEEWTEMGDWEKIRYRNVKRNYEALITI	1/1:46:83	1.2e-14	AFKDISIYFSKEEWTEMGDWEKIRYRNVKRNYEALITI	1/1:46:83	1.1e-27	AFKDISIYFSKEEWTEMGDWEKIRYRNVKRNYEALITI
136	PRDM9 ortho	PRDM7	A0A3Q7W436	uarc	Ursus arctos horribilis	grizzly bear	Mammalia	probable histone-lysine N-methyltransferase PRDM7	MAEERLPEGFLPVAIGQDLLGPCTDTCPRQTLEPQKPTVMELSELCAPRDPGLGATLIAALIGGFCLTGSYKCLSLGAERLMRTSPASESEQSLPGGPSTISLNTSPEETPERDSGRTGWKPTVRDAFKDISIYFSKEEWTEMGDWEKIRYRNVKRNYEALITIGLRAPRPAFMCHRRQAIKSQVDDTEDSDEEWTPRQQVRPSWVAFRMEQSKHQRRIPRAPLCNESTLKELSETAKLLNTSGSELGQKPVSLPGEASTSGHDSLQKLEFRRKDVEVKMYSLRERKSLAYQEVSEPQDDDYLYCEKCQNFFIDSCAVHGPPTFVKDSAVDKGQPNRSALTLPPGLRIRPSGIPQAGLGVWNEASDLPLGLHFGPYEGQITEDEEAANSGYSWLITKGR…			PF01352 [KRAB]	PF09514 [SSXRD]	PF00856 [SET]		1/1:125:164	4e-09	RDAFKDISIYFSKEEWTEMGDWEKIRYRNVKRNYEALITI	1/1:127:164	4.9e-32	AFKDISIYFSKEEWTEMGDWEKIRYRNVKRNYEALITI	1/1:127:164	1.1e-15	AFKDISIYFSKEEWTEMGDWEKIRYRNVKRNYEALITI	1/1:127:164	1.2e-14	AFKDISIYFSKEEWTEMGDWEKIRYRNVKRNYEALITI	1/1:127:164	1.1e-27	AFKDISIYFSKEEWTEMGDWEKIRYRNVKRNYEALITI
137	PRDM9 ortho	PRDM7	A0A452TY75	umar	Ursus maritimus	polar bear	Mammalia	Uncharacterized protein	MRTSPASESEQSLPGGPSTISLNTSPEETPERDSGRTGWKPTVRDAFKDISIYFSKEEWTEMGDWEKIRYRNVKRNYEALITIGLRAPRPAFMCHRRQAIKSQVDDTEDSDEEWTPRQQGEGPGRFCGFLWKLKRIPRAPLCNESTLKELSETAKLLNTSGSELGQKPVSLPGEASTSGHDSLQKLEFRRKDVEVKMYSLRERKSLAYQEVSEPQDDDYLYCEKCQNFFIDSCAVHGPPTFVKDSAVDKGQPNRSALTLPPGLRIRPSGIPQAGLGVWNEASDLPLGLHFGPYEGQITEDEEAANSGYSWLITKGRNCYEYVDGKDNSWANWMRYVNCARDEEEQNLVAFQYHRQIFYRTCRVIRPGCELLVWYGDEYGQELGIKWGSKWKSELTAGKE…			PF01352 [KRAB]	PF09514 [SSXRD]	PF00856 [SET]	PF00096 [ZnF_C2H2]	1/1:44:83	4e-09	RDAFKDISIYFSKEEWTEMGDWEKIRYRNVKRNYEALITI	1/1:46:83	4.9e-32	AFKDISIYFSKEEWTEMGDWEKIRYRNVKRNYEALITI	1/1:46:83	1.1e-15	AFKDISIYFSKEEWTEMGDWEKIRYRNVKRNYEALITI	1/1:46:83	1.2e-14	AFKDISIYFSKEEWTEMGDWEKIRYRNVKRNYEALITI	1/1:46:83	1.1e-27	AFKDISIYFSKEEWTEMGDWEKIRYRNVKRNYEALITI
138	PRDM9 ortho		XP_015101716	vpac	Vicugna pacos	alpaca	Mammalia	PREDICTED: probable histone-lysine N-methyltransferase PRDM7	MSPDRSSEESTEGDAGEREWKPTVRDTFKDISIYFSKEEWTEMGEWEKIRYRNVKRNYEALITIGLRAPRPAFMCHRRKAIKPQVDDTEDSDEEWTPRQQVKTSWVAFRAEHSRHKKGMPRGPLSNQSSLKELSGTAKPLKTSGSGQAQKPFPPLGEASTSGRHSRQKLELRRKESQVKMYSLRERKGHAYQEVSEPQDDDYLYCEKCQNFFIDSCAAHGPPTFVKDSAVERGHPNRSALTLPPGLRIRPSGIPEAGLGVWNEASDLPLGLHFGPYEGQITEDEEAANSGYSWLITKGRNCYEYVDGKDKSWANWMRYVNCARDDEEQNLVAFQYHRQIFYRTCRVVRPGCELLVWYGDEYGQELGIKWGSQWKREHATGQAEPKIYLCPSCSLAFSSQ…							1/1:25:64	5.2e-10	RDTFKDISIYFSKEEWTEMGEWEKIRYRNVKRNYEALITI	1/1:27:64	1.9e-31	TFKDISIYFSKEEWTEMGEWEKIRYRNVKRNYEALITI	1/1:27:64	2.5e-15	TFKDISIYFSKEEWTEMGEWEKIRYRNVKRNYEALITI	1/1:27:64	1.8e-14	TFKDISIYFSKEEWTEMGEWEKIRYRNVKRNYEALITI	1/1:27:64	6.6e-27	TFKDISIYFSKEEWTEMGEWEKIRYRNVKRNYEALITI
139	PRDM9 ortho		XP_027711105	vurs	Vombatus ursinus	wombat	Mammalia	LOW QUALITY PROTEIN: histone-lysine N-methyltransferase PRDM9-like	MSRDSSPDGSPEEDEGEKGGPRCQGEDTFKDISMYFSKKQWMELREWEKVRLKNVKQNYEAMIKIGLSARRPSFMCHGRQNKRAKVEESGDSDEEWIPKQLVKTFRFPSRVKQKTHLRNKEMAKELADPKAEGMMDLSEELKIVVMNNLTNSEVKKQTGQMDESCATNQLTEGKSECRRKEAEVHMYNLRERKYQVYQEIWDPQDDDYLFCEECQTFFLETCAVHGPPKFVQDSTMIKGHPYCSAITLPPGLRIGLSGIPGAGLGVWNEASNLPLGLHFGPYEGQMTEDDEAANSGYSWMITKGRNCYEYVDGKEESCSNWMRYVNCARDEEEQNLVAFQYRRQIFYRTCQVIRPGCELLVWYGDEYGQELGIKWGNKWKRPLTAWTGESPGIYLCPSC…							1/1:26:65	5.8e-06	EDTFKDISMYFSKKQWMELREWEKVRLKNVKQNYEAMIKI	1/1:28:65	3.6e-26	TFKDISMYFSKKQWMELREWEKVRLKNVKQNYEAMIKI	1/1:28:65	1e-12	TFKDISMYFSKKQWMELREWEKVRLKNVKQNYEAMIKI	1/1:28:65	2.9e-13	TFKDISMYFSKKQWMELREWEKVRLKNVKQNYEAMIKI	1/1:28:65	6.9e-23	TFKDISMYFSKKQWMELREWEKVRLKNVKQNYEAMIKI
140	PRDM9 ortho	LOC112924552	A0A3Q7TZ41	vvul	Vulpes vulpes	red fox	Mammalia	LOW QUALITY PROTEIN: histone-lysine N-methyltransferase PRDM9-like	MAQLRRMKCDLPLPGKLDARKPLEQSMMMGVGALRRKTDGIKPPVALASPGFYPKAGRLGLGAQRLMGLLPVSESEQDPPGGPSTLSNNRFPEETPERASGRTGWKPKAKDAFKDISIYFSKEEWTQMGDWEKIRYRNVKRNYEALITLGLRAPRPTFMCDHRWAIKPQVDDTEDSDEEWTPRQQDEEETPEGEYFPNLVDKKNFFMDLNTGKSRRIYRVSQELGIKWGSKWKSELIAGKEPNPEIYPCPSCSLSFSSQKFLSQHLEHNHPSQILPRISIREHFQPKDPCPGCQNQQQQQHSDPQCWNDRAKGQEGKERFKPLPKXIRQRKISRAFSTPCKGQTTCEGIVKEEPSAGSQKLNPEDTGKLFKGVGMTRIIRVKYRGCGRGFNDRSHLSRH…			PF01352 [KRAB]			PF00096 [ZnF_C2H2]	1/1:110:149	2.8e-10	KDAFKDISIYFSKEEWTQMGDWEKIRYRNVKRNYEALITL	1/1:112:149	3.4e-31	AFKDISIYFSKEEWTQMGDWEKIRYRNVKRNYEALITL	1/1:112:149	2e-16	AFKDISIYFSKEEWTQMGDWEKIRYRNVKRNYEALITL	1/1:112:149	2.1e-14	AFKDISIYFSKEEWTQMGDWEKIRYRNVKRNYEALITL	1/1:112:149	1.5e-27	AFKDISIYFSKEEWTQMGDWEKIRYRNVKRNYEALITL
141	PRDM9 ortho	-	A0A2C9K8M8	bgla	Biomphalaria glabrata	Bloodfluke planorb	Mollusca	Uncharacterized protein	MDLEINSLDHTLTSIKEFFRPEQLEKIPDFERLHLSNMKQNYEAMTRAGLKVKPPEFMMGKKDDSNHKPVLHYSDTDGSDSDWTPDKERSQNHLGKKKTLASLVRKSKSSQKHQSPKPSKEVENKTIASENVEKTQMYSLRNSRNTGCIALPDEDDYIFCQECFLEYVGDCPEHGGLNIVLDAVVPSDSRIGKDEDYSKKTLPEGLVIKSSEIPEAGLGVFATKFFPSRTRFGPYLGKIVTNKMEAHKSGYSWQIYKNGKASHFVNADDPSNSNWMRFVNCSRSEDEQSVQAYQHRGHIYFIAHKAIQPNTEILVYYGDSYAKLLGIPLQKSEQSKKKQADNQKGDLHCNFCPLVFVSFHFYIESHLKHQHPEHYWNLMKMCQRQDTTQTDSEKCENSK…					PF00856 [SET]	PF00096 [ZnF_C2H2]				1/1:11:48	3.2e-15	TLTSIKEFFRPEQLEKIPDFERLHLSNMKQNYEAMTRA	1/1:11:48	9.3e-07	TLTSIKEFFRPEQLEKIPDFERLHLSNMKQNYEAMTRA	1/1:11:48	0.00052	TLTSIKEFFRPEQLEKIPDFERLHLSNMKQNYEAMTRA	1/1:11:48	6.2e-11	TLTSIKEFFRPEQLEKIPDFERLHLSNMKQNYEAMTRA
142	PRDM9 ortho		XP_009045324	lgig	Lottia gigantea	Owl Limpet snail	Mollusca	hypothetical protein LOTGIDRAFT_156439, partial (with SET domain and C2H2 Zn finger sequences)	MGASKFGQKQLDFKSKQIPNEVDSFFTKKQLEEMSDYEKNRYKNLRENYEMMVLMGLPVKKPGFMTAKWKRKKSVEDSESEKESDEEWTPNKSSKKKAKNCKLVPRFHVPFKTTSSTATSTVPIKTEVKMPRKRRIISCNVNIPTDSGKKVKKDVKSKPEPRYPLRKRDTCNYMNIEVPDDDEFLYCEECNMEYGGDCPVHGSYNIIENKQVEESVSQKDKNRCYLTAPDCIEIKESSIPNAGLGTFASITIPNRSRFGPYGGDIIKDTETAHNSGYCWQIYQEGKHHHFVDAKNPATSNWMRFVNCARTESEQNVTAYQYCGEIYYRTFKEIPPGSEILVWYGNEYGADLGINRPLWSKSTFVAYHENMKKGNKFSTFPWRLNGAKPAIEDVYPCSFC…					PF00856 [SET]		1/1:16:55	0.00084	KQIPNEVDSFFTKKQLEEMSDYEKNRYKNLRENYEMMVLM	1/1:18:55	4.4e-18	IPNEVDSFFTKKQLEEMSDYEKNRYKNLRENYEMMVLM	1/1:18:55	4.6e-06	IPNEVDSFFTKKQLEEMSDYEKNRYKNLRENYEMMVLM	1/1:18:55	2.6e-09	IPNEVDSFFTKKQLEEMSDYEKNRYKNLRENYEMMVLM	1/1:18:55	1.1e-14	IPNEVDSFFTKKQLEEMSDYEKNRYKNLRENYEMMVLM
143	PRDM9 ortho	-	A0A210PR51	myes	Mizuhopecten yessoensis	Japanese scallop	Mollusca	Histone-lysine N-methyltransferase PRDM9	MASVNGGAYTWDWGLCVSQTHKNYTEEDEGEQVDRYLMSVFFTNTELVNLGKKFPVVPGMPMLDFSALDKQSDNIDEFFTTAQLSKMSQYEILRFKNMRKNYEMMASLGLPAIKPDFMKSRRGGAKKKRKECSDDSDEEWTPASERRKSQRDRIPVTQFSFPLKQGVDAVKKTPKLKKIEKVPNIKPEKHEIKKNTDSKMPIHTYPLRPASSAVSYMKIEVPDDDEFLYCEECNKEYEGDCPVHGPLVIVEDTEIKPKDKERSLYTLPPGLCVRKSSIQNAGLGIWSDYKISPRTRFGPYKGEKTQDLDKAHSTGYAWQIYENGKPSFFIDAFDKNQANWMRYVNCARNEDEQNMTAYQHRGQIYYRTHKVINPDTELLVWYGEDYSEELGIRRWEDST…					PF00856 [SET]					1/1:71:108	1.2e-16	QSDNIDEFFTTAQLSKMSQYEILRFKNMRKNYEMMASL	1/1:71:108	1.3e-06	QSDNIDEFFTTAQLSKMSQYEILRFKNMRKNYEMMASL	1/1:71:108	0.0002	QSDNIDEFFTTAQLSKMSQYEILRFKNMRKNYEMMASL	1/1:71:108	3.1e-11	QSDNIDEFFTTAQLSKMSQYEILRFKNMRKNYEMMASL
144	PRDM9 ortho	-	A0A210R119	myes	Mizuhopecten yessoensis	Japanese scallop	Mollusca	Histone-lysine N-methyltransferase PRDM9	MASKFPVVPGMQILDFSALDKQSDNIDEFFTTAQLSKMSQYEIMRFKNMRKNYEMMASLGLPAIKPDFMKSRRRGAKRKRKECSDDSDEEWTPASERRKSQRDRIPVTQFSFPLKQEVGAVKKPPKLKKIEKAANIKPEKHEIKKNTDSKMPIHTYPLRPASSAVSYMKIEVPDDDEFLYCEECNKEYEGDCPVHGPLVIVEDTTIKPKDKEQSLYTLPPGLCIRKSSIPNAGLGIWSDYRILPRTRFGPYKGEKTQDLDKAHSTGYAWQIYENGKPSFFIDAFEKNQANWMRYVNCARNEDEQNMTAYQHRGQIYYRTHKVINPDTELLVWYGEDYSEELGIRRGEDSTELKPFTVNGTKYLDD					PF00856 [SET]					1/1:22:59	4.2e-16	QSDNIDEFFTTAQLSKMSQYEIMRFKNMRKNYEMMASL	1/1:22:59	1.3e-06	QSDNIDEFFTTAQLSKMSQYEIMRFKNMRKNYEMMASL	1/1:22:59	0.00012	QSDNIDEFFTTAQLSKMSQYEIMRFKNMRKNYEMMASL	1/1:22:59	5.5e-11	QSDNIDEFFTTAQLSKMSQYEIMRFKNMRKNYEMMASL
145	PRDM9 ortho	-	A0A3L5TRV6	mgal	Mytilus galloprovincialis	Mediterranean mussel	Mollusca	KRAB-related domain-containing protein	MSKGIPNRLKSKKFAQHVLQKHCKWPTSDLLRKEEKTVNYEEKLCEYQYLTCLKKHVKYEIPKLANMEQSDFRKFEEDARSGDIEQYFTNTQMASLSDYEKLRYRNMKKNYEMMVKMGLPAQKPEFMKKQIKNPSTKQTDFASEEEWKPSSSKQNIAQKPTFMQRSKKKRRVKHTDDSDEEWRPSSEKAKKSTNPPVFKLLKKTRKAKSEKIEQTCADEKSRKKDEENKEVHRYPQRQLPRTNYMYLEVPDDDEFICK							1/1:78:117	0.00043	DARSGDIEQYFTNTQMASLSDYEKLRYRNMKKNYEMMVKM	1/1:80:117	3.3e-22	RSGDIEQYFTNTQMASLSDYEKLRYRNMKKNYEMMVKM	1/1:80:117	1.4e-09	RSGDIEQYFTNTQMASLSDYEKLRYRNMKKNYEMMVKM	1/1:80:117	1.4e-09	RSGDIEQYFTNTQMASLSDYEKLRYRNMKKNYEMMVKM	1/1:80:117	1.2e-18	RSGDIEQYFTNTQMASLSDYEKLRYRNMKKNYEMMVKM
146	PRDM9 ortho	PRDM7	A0A2K5DFM2	anan	Aotus nancymaae	Nancy Ma's night monkey	Primates	KRAB-related domain-containing protein	MSPERSQEESPEGDTGRTEQKPYDAFKDISIYFSKEEWAEMGDWEKTRYRNVKRNYNALITIGNEKTNQLQVDDTEDSDEEWTPRQQVKPPGTAFRVEQSKHQKGMPKASFSNESSLKKLSGTANELNTSGSEQAQKPVSPPGEASTSGQHSRLKPELRRKEPEGKMYSLRERKGHAYEEVSEPQDDDYLYCEMCQNFFIGSCAAHGPPTFVKDSAVDKGHPNHAALSLPPGLRIGPSGGLPETSTLTKNFLFQNQSQRFIHVPHAVWPSQVRNFSVIMWNAITHSLEKLPKNSSNQRMPARGNRKRSSNILIHATLMTKPKVKKSKKGPNS			PF01352 [KRAB]	PF09514 [SSXRD]			1/1:23:62	1.2e-09	YDAFKDISIYFSKEEWAEMGDWEKTRYRNVKRNYNALITI	1/1:25:62	6.4e-32	AFKDISIYFSKEEWAEMGDWEKTRYRNVKRNYNALITI	1/1:25:62	3.8e-15	AFKDISIYFSKEEWAEMGDWEKTRYRNVKRNYNALITI	1/1:25:62	3.7e-15	AFKDISIYFSKEEWAEMGDWEKTRYRNVKRNYNALITI	1/1:25:62	8.3e-28	AFKDISIYFSKEEWAEMGDWEKTRYRNVKRNYNALITI
147	PRDM9 ortho	PRDM9	XP_003735409	cjac	Callithrix jacchus	White-tufted-ear marmoset	Primates	PREDICTED: LOW QUALITY PROTEIN: histone-lysine N-methyltransferase PRDM9-like [Callithrix jacchus]	MSPERSQEESPEGDTGRTEQKPMVKDAFKDISMYFSKEEWAEMGDWEKTRYRNMKRNYNALITIGLRATRPAFMCHRRQAIKLQVDDTEDSDEEWTPRQQVKPPGMAFRVGQSKHQKGMPKASFGNESSLKKLSGTANVLNTSGPEQAQKPVSPPGEASTSGQHSRLKLELRRKDTEEKMYSLRERKGLAYKEVSEPQDDDYLYCEICQNFFIDSCAAHGPPTFVKDSAVDKGHPNHAALSLPPGLRIGPSGIPQAGLGVWNEASDLPLGLHFGPYEGRVTEDEEAASSGYSWLITKGRNCYEYVDGKDKSWANWMRYVNCARDDEEQNLVAFQYHRQIFYRTCRVIRPGCELLVWYGDEYGQELGIKWGSKWKKELMAGRESKPEIHPCPSCCLAFSS…			PF01352 [KRAB]	PF09514 [SSXRD]	PF00856 [SET]	PF00096 [ZnF_C2H2]	1/1:25:64	1.6e-09	KDAFKDISMYFSKEEWAEMGDWEKTRYRNMKRNYNALITI	1/1:27:64	3.6e-31	AFKDISMYFSKEEWAEMGDWEKTRYRNMKRNYNALITI	1/1:27:64	3.6e-16	AFKDISMYFSKEEWAEMGDWEKTRYRNMKRNYNALITI	1/1:27:64	1.9e-15	AFKDISMYFSKEEWAEMGDWEKTRYRNMKRNYNALITI	1/1:27:64	2e-28	AFKDISMYFSKEEWAEMGDWEKTRYRNMKRNYNALITI
148	PRDM9 ortho	-	A0A2K5SD85	ccap	Cebus capucinus imitator	Colombian white-faced capuchin	Primates	Uncharacterized protein	ISPERSQEESPEGDTGRAEQKPMVKDAFKDIAIYFKEEWAEMGDWEKTRYRNVKRKYNARITIEQNFCLISAFMCHRRQAIKFQVDDTEDSDEEWTPRQQVKPPGMAFRVEQSKHQKGMPKVSFSNESSLKKLSGTANVLNTSGSEQAQKPVSPPGEASTSGQHSRLKPELRRKETEGKMYSLRERKGHAYKEVNCEMCQNFFTDSCAAHGPQTFVKDSAEDKGHSNHAALSLPPGLRIRPSGIPQAGLGVWNEASDLPLGLHFGPYEGRVTEDEEAANSGYSWLVRITWRNCYEYVDGKDKSWANWMRYVNCAGDDEEQNLVAFQYHRQIYRTCRVIRPGCELLVWYGDEYCQELDIKWGSKWKKELMAGRGKVSLRRQHLRSACACGQRNQSQRFIH…				PF09514 [SSXRD]	PF00856 [SET]		1/1:25:63	1.5e-05	KDAFKDIAIYFKEEWAEMGDWEKTRYRNVKRKYNARITI	1/1:27:63	2.9e-23	AFKDIAIYFKEEWAEMGDWEKTRYRNVKRKYNARITI	1/1:27:63	6.1e-11	AFKDIAIYFKEEWAEMGDWEKTRYRNVKRKYNARITI	1/1:27:63	9.8e-12	AFKDIAIYFKEEWAEMGDWEKTRYRNVKRKYNARITI	1/1:27:63	3.3e-21	AFKDIAIYFKEEWAEMGDWEKTRYRNVKRKYNARITI
149	PRDM9 ortho		XP_017376754	ccap	Cebus capucinus imitator	Colombian white-faced capuchin	Primates	PREDICTED: LOW QUALITY PROTEIN: histone-lysine N-methyltransferase PRDM9-like, partial	MKQSLLDSPSTMSPERSQEESPEGDTGRAEQRPMVKDAFKDIAIYFSKEEWAEMGDWEKTRYRNVKRNYNALITIGLRASRPAFMCHRRQAIKLQVDDTEDSDEEWTPRQQGKRKGMPKASFSNESSLKKLSGTANVLNTSGSEQAQKPVSPPGEASTSGQHSRLKPELRRKETEGKMYSLRERKGHAYKEVSEPQDDDYLYCEMCQNFFIDSCAAHRPPTFVKDSAVDKGHPNHAALSLPPGXRIGPSGIPQAGLGVWNEASDLPLGLHFGPYEGRVTEDEEAANSGYSWLITKGRNSYEYVDGKDKSRANWMRYVNCVRDDEEQNLVAFQYHRQIFYRTCRVIRPGCELLVWYGDEYGQELGIKWGSKWKKEFMAGREPKPEIHPCPSCCLAFSSQK…			PF01352 [KRAB]	PF09514 [SSXRD]	PF00856 [SET]		1/1:36:75	1.6e-10	KDAFKDIAIYFSKEEWAEMGDWEKTRYRNVKRNYNALITI	1/1:38:75	2.7e-31	AFKDIAIYFSKEEWAEMGDWEKTRYRNVKRNYNALITI	1/1:38:75	4.3e-15	AFKDIAIYFSKEEWAEMGDWEKTRYRNVKRNYNALITI	1/1:38:75	3.9e-15	AFKDIAIYFSKEEWAEMGDWEKTRYRNVKRNYNALITI	1/1:38:75	1.4e-27	AFKDIAIYFSKEEWAEMGDWEKTRYRNVKRNYNALITI
150	PRDM9 ortho	-	A0A2K5N550	caty	Cercocebus atys	Sooty mangabey	Primates	Uncharacterized protein	MSPERSQEESPEEDTERTERKPMVKDAFKDISIYFTKEEWAEMGDWEKTRYRNVKRNYNALITIGLRATRPAFMCHRRQAIKLQVDDTEDSDEEWTPRQQVKPPWMAVRVEQSKHQKGMPKASFNNESSLKEVSGMANLLNTSGSEQAQKPVSPPGEARTSGQHSRLKLELRRKETEGKMYSLRERKGHAYKEVSEPQDDDYLYCEMCQNFFIDSCAAHGPPTFIKDSAVEKGHPNRSALSLPPGLRIGPSGIPQAGLGVWNEASDLPLGLHFGPYEGQITQDEEAANNGYSWLITKGRNCYEYVDGKDKSWANWMRYVNCARDDEEQNLVAFQYHRQIFYRTCRVIRPGCELLVWYGDEYGQELGIKWGSKWKKELMAGREPKPEIHPCPSCCLAFSS…			PF01352 [KRAB]	PF09514 [SSXRD]	PF00856 [SET]	PF00096 [ZnF_C2H2]	1/1:25:64	8.1e-10	KDAFKDISIYFTKEEWAEMGDWEKTRYRNVKRNYNALITI	1/1:27:64	1.1e-31	AFKDISIYFTKEEWAEMGDWEKTRYRNVKRNYNALITI	1/1:27:64	1.7e-14	AFKDISIYFTKEEWAEMGDWEKTRYRNVKRNYNALITI	1/1:27:64	1.5e-15	AFKDISIYFTKEEWAEMGDWEKTRYRNVKRNYNALITI	1/1:27:64	9.7e-28	AFKDISIYFTKEEWAEMGDWEKTRYRNVKRNYNALITI
151	PRDM9 ortho	PRDM9	A0A0D9RXC5	csab	Chlorocebus sabaeus	Green monkey	Primates	Uncharacterized protein	MSPERSQEESPEEDTERTERKPTVKDAFKDISIYFTKEEWAEMGDWEKTRYRNVKRNYNALITIGLRATRPTFMCHRRQAIKLQVDDTEDSDEEWTPRQQVKPPWMAVRVEQSKHQKGMPKASFNNESSLKEVSGTANLLNTSGSEQAQKPVSPPGEARTSGRHSRLKLELRKKETEGKMYSLRERKGHAYKEVSEPQDDDYLYCEMCQNFFIDSCAAHGPPTFVKDSAVDKGHPNRSALSLPPGLRIGPSGIPQAGLGVWNEASDLPLGLHFGPYEGRITEDEEAANNGYSWLITKGRNCYEYVDGKDKSWANWMRYVNCARDDEEQNLVAFQYHRQIFYRTCRVIRPGCELLVWYGDEYGQELGIKWGSKWKKELMAGREPKPEIHPCPSCCLAFSS…			PF01352 [KRAB]	PF09514 [SSXRD]	PF00856 [SET]	PF00096 [ZnF_C2H2]	1/1:25:64	8.1e-10	KDAFKDISIYFTKEEWAEMGDWEKTRYRNVKRNYNALITI	1/1:27:64	1.1e-31	AFKDISIYFTKEEWAEMGDWEKTRYRNVKRNYNALITI	1/1:27:64	1.7e-14	AFKDISIYFTKEEWAEMGDWEKTRYRNVKRNYNALITI	1/1:27:64	1.5e-15	AFKDISIYFTKEEWAEMGDWEKTRYRNVKRNYNALITI	1/1:27:64	9.7e-28	AFKDISIYFTKEEWAEMGDWEKTRYRNVKRNYNALITI
152	PRDM9 ortho	PRDM7	G3QEK3	ggor	Gorilla gorilla gorilla	Western lowland gorilla	Primates	KRAB-related domain-containing protein	MSPERSQEESPEGDTERTERKPMVKDAFKDISIYFTKEEWAEMGDWEKTRYRNVKRNYNALITIGLRATRPVFMCHRRQAIKLQVDDTEDSDEEWTPRQQVKPPWMAFRGEQSKHQKGMPKASFNNESSLKELSGTPNLLNTSGSEQAQKPVSPPGEASTSGQHSRRKLELRRKETEGKMYSLRERKGHAYKEISKPQDDDYLYCEMCQNFFIDSCAAHGPPTFVKDSAVDKRHPNRSALSLPPGLRIGPSGIPQAGLGVWNEASDLPLGLHFGPYEGRITEDKEAANSGYSWLITKGRNCYEYVDGKDKSWANWMRYVNCARDDEEQNLVALQYHRQIFYRTESLGRAVNCWSGMGTSTARNWASSGAASGRKSSRQGENQSQRSIHVPHAVWPFQVR…			PF01352 [KRAB]	PF09514 [SSXRD]			1/1:25:64	8.1e-10	KDAFKDISIYFTKEEWAEMGDWEKTRYRNVKRNYNALITI	1/1:27:64	1.1e-31	AFKDISIYFTKEEWAEMGDWEKTRYRNVKRNYNALITI	1/1:27:64	1.7e-14	AFKDISIYFTKEEWAEMGDWEKTRYRNVKRNYNALITI	1/1:27:64	1.5e-15	AFKDISIYFTKEEWAEMGDWEKTRYRNVKRNYNALITI	1/1:27:64	9.7e-28	AFKDISIYFTKEEWAEMGDWEKTRYRNVKRNYNALITI
153	PRDM9 ortho	PRDM9	G3S233	ggor	Gorilla gorilla gorilla	Western lowland gorilla	Primates	PR/SET domain 9	MSPERSQEESPEEDTERTERKPMVKDAFKDISIYFTKEEWAEMGDWEKTRYRNVKRNYNALITIGLRATRPAFMCHRRQAIKLQVDDTEDSDEEWTPRQQVKPPCMALRVEQRKHQKGMPKASFSNESSLKELSRTANLLNASGSEQAQKPVSPPGEASTSGQHSRLKLELRKKETEGKMYSLRERKGHAYKELAVMSWCNNFIICCAAHGPPIFVKDSAVDKGHPNRSALSLPPGLRIGPSGIPQAGLGVWNEASDLPLGLHFGPYKGRITEDEEAANNGYSWLITKGRNCYEYVDGKDKSWANWMRYVNCARDDEEQNLVAFQYHRQIFYRTCRVIRPGCELLVWYGDEYGQELGIKWGSKWKKELMAGREPKPEIHPCPSCCLAFSSQKFLSQHVE…			PF01352 [KRAB]	PF09514 [SSXRD]	PF00856 [SET]	PF00096 [ZnF_C2H2]	1/1:25:64	8.1e-10	KDAFKDISIYFTKEEWAEMGDWEKTRYRNVKRNYNALITI	1/1:27:64	1.1e-31	AFKDISIYFTKEEWAEMGDWEKTRYRNVKRNYNALITI	1/1:27:64	1.7e-14	AFKDISIYFTKEEWAEMGDWEKTRYRNVKRNYNALITI	1/1:27:64	1.5e-15	AFKDISIYFTKEEWAEMGDWEKTRYRNVKRNYNALITI	1/1:27:64	9.7e-28	AFKDISIYFTKEEWAEMGDWEKTRYRNVKRNYNALITI
75	PRDM9 ortho	PRDM7	NP_001091643	hsap	Homo sapiens	Human	Primates	probable histone-lysine N-methyltransferase PRDM7 [Homo sapiens]	MSPERSQEESPEGDTERTERKPMVKDAFKDISIYFTKEEWAEMGDWEKTRYRNVKMNYNALITVGLRATRPAFMCHRRQAIKLQVDDTEDSDEEWTPRQQVKPPWMAFRGEQSKHQKGMPKASFNNESSLRELSGTPNLLNTSDSEQAQKPVSPPGEASTSGQHSRLKLELRRKETEGKMYSLRERKGHAYKEISEPQDDDYLYCEMCQNFFIDSCAAHGPPTFVKDSAVDKGHPNRSALSLPPGLRIGPSGIPQAGLGVWNEASDLPLGLHFGPYEGRITEDEEAANSGYSWLITKGRNCYEYVDGKDKSSANWMRYVNCARDDEEQNLVAFQYHRQIFYRTCRVIRPGCELLVWSGDEYGQELGIRSSIEPAESLGQAVNCWSGMGMSMARNWASSG…			PF01352 [KRAB]	PF09514 [SSXRD]			1/1:25:64	2.8e-10	KDAFKDISIYFTKEEWAEMGDWEKTRYRNVKMNYNALITV	1/1:27:64	3.3e-29	AFKDISIYFTKEEWAEMGDWEKTRYRNVKMNYNALITV	1/1:27:64	2.8e-13	AFKDISIYFTKEEWAEMGDWEKTRYRNVKMNYNALITV	1/1:27:64	2.7e-15	AFKDISIYFTKEEWAEMGDWEKTRYRNVKMNYNALITV	1/1:27:64	1.2e-25	AFKDISIYFTKEEWAEMGDWEKTRYRNVKMNYNALITV
76	PRDM9 ortho	PRDM9	NP_064612	hsap	Homo sapiens	Human	Primates	histone-lysine N-methyltransferase PRDM9 [Homo sapiens]	MSPEKSQEESPEEDTERTERKPMVKDAFKDISIYFTKEEWAEMGDWEKTRYRNVKRNYNALITIGLRATRPAFMCHRRQAIKLQVDDTEDSDEEWTPRQQVKPPWMALRVEQRKHQKGMPKASFSNESSLKELSRTANLLNASGSEQAQKPVSPSGEASTSGQHSRLKLELRKKETERKMYSLRERKGHAYKEVSEPQDDDYLYCEMCQNFFIDSCAAHGPPTFVKDSAVDKGHPNRSALSLPPGLRIGPSGIPQAGLGVWNEASDLPLGLHFGPYEGRITEDEEAANNGYSWLITKGRNCYEYVDGKDKSWANWMRYVNCARDDEEQNLVAFQYHRQIFYRTCRVIRPGCELLVWYGDEYGQELGIKWGSKWKKELMAGREPKPEIHPCPSCCLAFSS…			PF01352 [KRAB]	PF09514 [SSXRD]	PF00856 [SET]	PF00096 [ZnF_C2H2]	1/1:25:64	8.1e-10	KDAFKDISIYFTKEEWAEMGDWEKTRYRNVKRNYNALITI	1/1:27:64	1.1e-31	AFKDISIYFTKEEWAEMGDWEKTRYRNVKRNYNALITI	1/1:27:64	1.7e-14	AFKDISIYFTKEEWAEMGDWEKTRYRNVKRNYNALITI	1/1:27:64	1.5e-15	AFKDISIYFTKEEWAEMGDWEKTRYRNVKRNYNALITI	1/1:27:64	9.7e-28	AFKDISIYFTKEEWAEMGDWEKTRYRNVKRNYNALITI
154	PRDM9 ortho		XP_015306727	mfas	Macaca fascicularis	Crab-eating Macaque	Primates	PREDICTED: histone-lysine N-methyltransferase PRDM9	MSPERSQEESPEEDTERTERKPTVKDAFKDISIYFTKEEWAEMGDWEKTRYRNVKRNYNALITIGLRATRPAFMCHRRQAIKLQVDDTEDSDEEWTPRQQVKPPWMAVRVEQSKHQKGMPKASFNNESSLKEVSGMANLLNTSGSEQAQKPVSPPGEARTSGQHSRLKLELRRKETEGKMYSLRERKGHAYKEVSEPQDDDYLYCEMCQNFFIDSCAAHGPPTFIKDSAVEKGHPNRSALSLPPGLRIGPSGIPQAGLGVWNEASDLPLGLHFGPYEGRITQDEEAANNGYSWLITKGRNCYEYVDGKDKSWANWMRYVNCARDDEEQNLVAFQYHRQIFYRTCRVIRPGCELLVWYGDEYGQELGIKWGSKWKKELMAGREPKPEIHPCPSCCLAFSS…			PF01352 [KRAB]	PF09514 [SSXRD]	PF00856 [SET]	PF00096 [ZnF_C2H2]	1/1:25:64	8.1e-10	KDAFKDISIYFTKEEWAEMGDWEKTRYRNVKRNYNALITI	1/1:27:64	1.1e-31	AFKDISIYFTKEEWAEMGDWEKTRYRNVKRNYNALITI	1/2:27:64	1.7e-14	AFKDISIYFTKEEWAEMGDWEKTRYRNVKRNYNALITI	1/1:27:64	1.5e-15	AFKDISIYFTKEEWAEMGDWEKTRYRNVKRNYNALITI	1/1:27:64	9.7e-28	AFKDISIYFTKEEWAEMGDWEKTRYRNVKRNYNALITI
155	PRDM9 ortho	PRDM9	XP_001083675	mmul	Macaca mulatta	Rhesus Macaque	Primates	PREDICTED: histone-lysine N-methyltransferase PRDM9-like [Macaca mulatta]	MSPERSQEESPEEDTERTERKPTVKDAFKDISIYFTKEEWAEMGDWEKTRYRNVKRNYNALITIGLRATRPAFMCHRRQAIKLQVDDTEDSDEEWTPRQQVKPPWMAVRVEQSKHQKGMPKASFNNESSLKEVSGMANLLNTSGSEQAQKPVSPPGEARTSGQHSRLKLELRRKETEGKMYSLRERKGHAYKEVSEPQDDDYLYCEMCQNFFIDSCAAHGPPTFIKDSAVEKGHPNRSALSLPPGLRIGPSGIPQAGLGVWNEASDLPLGLHFGPYEGRITQDEEAANNGYSWLITKGRNCYEYVDGKDKSWANWMRYVNCARDDEEQNLVAFQYHRQIFYRTCRVIRPGCELLVWYGDEYGQELGIKWGSKWKKELMAGREPKPEIHPCPSCCLAFSS…			PF01352 [KRAB]	PF09514 [SSXRD]	PF00856 [SET]	PF00096 [ZnF_C2H2]	1/1:25:64	8.1e-10	KDAFKDISIYFTKEEWAEMGDWEKTRYRNVKRNYNALITI	1/1:27:64	1.1e-31	AFKDISIYFTKEEWAEMGDWEKTRYRNVKRNYNALITI	1/1:27:64	1.7e-14	AFKDISIYFTKEEWAEMGDWEKTRYRNVKRNYNALITI	1/1:27:64	1.5e-15	AFKDISIYFTKEEWAEMGDWEKTRYRNVKRNYNALITI	1/1:27:64	9.7e-28	AFKDISIYFTKEEWAEMGDWEKTRYRNVKRNYNALITI
156	PRDM9 ortho		XP_011724859	mnem	Macaca nemestrina	Pig-tailed macaque	Primates	LOW QUALITY PROTEIN: probable histone-lysine N-methyltransferase PRDM7	MSPERSQEESPEEDTERTERKPTVKDAFKDISIYFTKEEWAEMGDWEKTRYRNVKRNYNALITIGLRATRPAFMCHRRQAIKLQVDDTEDSDEEWTPRQQVKPPWMAVRVEQSKHQKGMPKASFNNESSLKEVSGMANLLNTSGSEQAQKPVSPPGEARTSGQHSRLKLELRRKETEGKMYSLRERKGHAYKEVSEPQDDDYLYCEMCQNFFIDSCAAHGPPTFIKDSAVEKGHPNRSALSLPPGLRIGPSGIPQAGLGVWNEASDLPLGLHFGPYEGRITQDEEAANNGYSWLITKGRNCYEYVDGKDKSWANWMRYVNCARDDEEQNLVAFQYHRQIFYRTCRVIRPGCXNCWSGMGMSMARNWASNGAASGRKSSWQGENQSQRSIHVPHAVWPFQ…			PF01352 [KRAB]	PF09514 [SSXRD]	PF00856 [SET]		1/1:25:64	8.1e-10	KDAFKDISIYFTKEEWAEMGDWEKTRYRNVKRNYNALITI	1/1:27:64	1.1e-31	AFKDISIYFTKEEWAEMGDWEKTRYRNVKRNYNALITI	1/1:27:64	1.7e-14	AFKDISIYFTKEEWAEMGDWEKTRYRNVKRNYNALITI	1/1:27:64	1.5e-15	AFKDISIYFTKEEWAEMGDWEKTRYRNVKRNYNALITI	1/1:27:64	9.7e-28	AFKDISIYFTKEEWAEMGDWEKTRYRNVKRNYNALITI
157	PRDM9 ortho	-	A0A2K5YJP3	mleu	Mandrillus leucophaeus	Drill	Primates	Uncharacterized protein	MGHNLEKEGRSLCFTETPRGPRLCPIHRVEEKDQLDVKDAFKDISIYFTKEEWAEMGDWEKTRYRNVKRNYNALITIGLRATRPAFMCHRRQAIKLQVDDTEDSDEEWTPRQQVKPPWMAVRVEQSKHQKGMPKASFNNESSLKEVSGTANLLNTSGSEQAQKPVSPPGEARTSGRHSRLKLELRRKETEGKMYSLRERKGHAYKEVSEPQDDDYLYCEMCQNFFIDSCAAHGPPTFIKDSAVEKGHPNRSALSLPPGLRIGPSGIPQAGLGVWNEASDLPLGLHFGPYEGRITQDEEAANNGYSWLITKGRNCYEYVDGKDKSWANWMRYVNCARDDEEQNLVAFQYHRQIFYRTCRVIRPGCELLVWYGDEYSQELGIKSIQHLVGESLNKTSTLTK…			PF01352 [KRAB]	PF09514 [SSXRD]	PF00856 [SET]		1/1:38:77	8.1e-10	KDAFKDISIYFTKEEWAEMGDWEKTRYRNVKRNYNALITI	1/1:40:77	1.1e-31	AFKDISIYFTKEEWAEMGDWEKTRYRNVKRNYNALITI	1/1:40:77	1.7e-14	AFKDISIYFTKEEWAEMGDWEKTRYRNVKRNYNALITI	1/1:40:77	1.5e-15	AFKDISIYFTKEEWAEMGDWEKTRYRNVKRNYNALITI	1/1:40:77	9.7e-28	AFKDISIYFTKEEWAEMGDWEKTRYRNVKRNYNALITI
158	PRDM9 ortho	PRDM9	A0A2I3HRB4	nleu	Nomascus leucogenys	Northern white-cheeked gibbon	Primates	Uncharacterized protein	MSPERSQEESPEEDTERTEQKPTVKDAFKDISIYFTKEEWAEMGDWEKTRYRNVKRNYNALITIGLRATRPAFMCHRRQAIKLQVDDTEDSDEEWTPRQQVKPPWMALRMEQRKHQKVSISQILLTRNLSHGSKHSTVGKGHPNRSALSLPPGLRIGPSGIPQAGLGVWNEASDLPLGLHFGPYEGRITEDEEAANNGYSWLITKGRNCYEYVDGKDKSWANWMRMMVLHLIFIPSYVVRPEQNIYTDQKLPLSEPKAEIHPCPSCCLAFSSQKFLSQHVARHHSSQNFPGPSARKFLQPENPCPGDQNQEQQYSDPRSCNDKTKGQEIKERSKLLNKRTWQREISRAFSSSPKVQMGSCRVGKRIIEEESRTGQKVNPGNTGQLFVGVGISRIAEVKY…			PF01352 [KRAB]			PF00096 [ZnF_C2H2]	1/1:25:64	8.1e-10	KDAFKDISIYFTKEEWAEMGDWEKTRYRNVKRNYNALITI	1/1:27:64	1.1e-31	AFKDISIYFTKEEWAEMGDWEKTRYRNVKRNYNALITI	1/1:27:64	1.7e-14	AFKDISIYFTKEEWAEMGDWEKTRYRNVKRNYNALITI	1/1:27:64	1.5e-15	AFKDISIYFTKEEWAEMGDWEKTRYRNVKRNYNALITI	1/1:27:64	9.7e-28	AFKDISIYFTKEEWAEMGDWEKTRYRNVKRNYNALITI
159	PRDM9 ortho	-	H0XJF3	ogar	Otolemur garnettii	Garnett's greater bushbaby	Primates	Uncharacterized protein	KFSTMSLNRSQEDSPEIDKGQEGKSPQLKDAFKDISIYFSKEEWAEMGDWEKMHYRNVKRNYNVLIDIGLRTPRPAFIQAIKYQVDDAEDLEDEFTELSDLIKHPWMAFRMEQSKCQKKVFHRNPNTGNRMTNNKENNLVLHLGSSPNISGSEEHQKCVSPPGEPSTSGQHSKRKWDLRIKDIEVRMYSLQERGHAYKEFSKPQDDDYLYCEKCQNSFIDNSAVHGPPTFVKYTAMHKVHPNHSVLSLPPGLGIRTSDISWAGLGVLNEASDLQPGMHFGPYEAQVIQDEEAANSEYSWLITKGRNCYEYVDEKDESQSNWMRYVNCAQDEEEQNLVAFQNHRQIFYQTCWAIRPVCKLLVWYWDKYVQELGIKWGSMWKKELTAGQAEPKPEIHPCPS…			PF01352 [KRAB]	PF09514 [SSXRD]		PF00096 [ZnF_C2H2]	1/1:29:68	1.2e-08	KDAFKDISIYFSKEEWAEMGDWEKMHYRNVKRNYNVLIDI	1/1:31:68	9.5e-31	AFKDISIYFSKEEWAEMGDWEKMHYRNVKRNYNVLIDI	1/1:31:68	3.1e-15	AFKDISIYFSKEEWAEMGDWEKMHYRNVKRNYNVLIDI	1/1:31:68	8.7e-15	AFKDISIYFSKEEWAEMGDWEKMHYRNVKRNYNVLIDI	1/1:31:68	1.3e-26	AFKDISIYFSKEEWAEMGDWEKMHYRNVKRNYNVLIDI
160	PRDM9 ortho		XP_012669413	ogar	Otolemur garnettii	Garnett's greater bushbaby	Primates	LOW QUALITY PROTEIN: probable histone-lysine N-methyltransferase PRDM7, partial	GKNAFKDISKYFSKEEWAEKGTQEKIHHRNVERNYDVPTDRGLRAPRLAFMGHRRQAIKYQVDHAEDSDEEWTPRQQGERPKDLKRMPRAPVSHASRLKDLSGPTSSPNISGSKQHRKRVSLSGEASASGQHSRRKSEPKRKEIEVRRYNLRKRMDRSYKEVSEPQNDDYLYCYVCQDYFIDRCDIHGPPTFVKDIAVDKGHPNRTALTLPPGLSIRQSGIPQAGDGVWNDASELPLGLHFGPYEGQVLEDEKAARSGYAWKITKGRNCYEYVDGKDQSQGNWMRYVNCARDDEEKNLEAFQYHSQIFYRTCRVIRPGCELLTWYGTEYGKKLGITWTGKQKKXLTAGQAFQELELDLEGDAHNLCSSAADT				PF09514 [SSXRD]	PF00856 [SET]		1/1:2:41	0.00045	KNAFKDISKYFSKEEWAEKGTQEKIHHRNVERNYDVPTDR	1/1:4:41	9.7e-22	AFKDISKYFSKEEWAEKGTQEKIHHRNVERNYDVPTDR	1/1:4:41	3.1e-12	AFKDISKYFSKEEWAEKGTQEKIHHRNVERNYDVPTDR	1/1:4:41	1.1e-07	AFKDISKYFSKEEWAEKGTQEKIHHRNVERNYDVPTDR	1/1:4:41	9.9e-19	AFKDISKYFSKEEWAEKGTQEKIHHRNVERNYDVPTDR
161	PRDM9 ortho	-	H0XHP5	ogar	Otolemur garnettii	Garnett's greater bushbaby	Primates	Uncharacterized protein	KLSTMSPNRSQEESPEVEKGEEDESPHVRGAFKDTYKYFSMEELAEMGDWEKIHHGNVERNYDVLIDRGLRAPQPAFMGHRRQAIKYQVDDTEDSDEEWTPRQQGKHSLMAFRMQPRKRQKGMPRAPLSHDSILQDLSGPANSLNISDSEQHQNCVSLPGEANASGQNSRRKSALRRKEIEARSYNLRERTDRSYEEVSEPQNDDYLYCEMCQDYFIDRCDVHGPPTFVKDIAVDKGHPNRAALTLPPGLSIRQSGIPQAGDGVWNEACELPLGLHFGPYEGQVLEDEEAARSGYAWKITKGRNCYEYVDGKDQSQGNWMRYVNCARDDEEQNLVAFQYHSQIFYRTCRVIRPGCELLVWYGTEYGKKLGIMWTSKRKKELTGQDPKPENHPCPSCSLA…				PF09514 [SSXRD]	PF00856 [SET]	PF00096 [ZnF_C2H2]	1/1:29:68	0.0015	RGAFKDTYKYFSMEELAEMGDWEKIHHGNVERNYDVLIDR	1/1:31:68	6e-22	AFKDTYKYFSMEELAEMGDWEKIHHGNVERNYDVLIDR	1/1:31:68	7.1e-10	AFKDTYKYFSMEELAEMGDWEKIHHGNVERNYDVLIDR	1/1:31:68	6.7e-08	AFKDTYKYFSMEELAEMGDWEKIHHGNVERNYDVLIDR	1/1:31:68	3.6e-18	AFKDTYKYFSMEELAEMGDWEKIHHGNVERNYDVLIDR
162	PRDM9 ortho	PRDM7	A0A2R9AJF4	ppan	Pan paniscus	Bonobo	Primates	KRAB-related domain-containing protein	MSPERSQEESPEEDTERTERKPMVKDAFKDISIYFTKEEWAEMGDWEKTRYRNVKRNYNALITIGLRATRPAFMCHRRQAIKLQVDDTEDSDEEWTPRQQVKPPWMALRVEQRKHQKGMPKASFSNESSLKELSRTANLLNASGSEQAQKPVSPPGEASTSGQHSRLKLELRKKETEGKMYSLRERKGHAYKEVSEPQDDDYLYCEMCQNFFIDSCAAHGPPTFVKDSAVDKRHPNRSALSLPPGLRIGPSGIPQAGLGVWNEASDLPLGLHFGPYKGRITEDEEAANNGYSWLITKGRNCYEYVDGKDKSWANWMRYVNCARDDEEQNLVAFQSSIEPAESLGQAVNCWSGMGMNMARNWASSGAASGRKSSWQGENQSQRSIHVPHAVWPFQVRNFS…			PF01352 [KRAB]	PF09514 [SSXRD]			1/1:25:64	8.1e-10	KDAFKDISIYFTKEEWAEMGDWEKTRYRNVKRNYNALITI	1/1:27:64	1.1e-31	AFKDISIYFTKEEWAEMGDWEKTRYRNVKRNYNALITI	1/1:27:64	1.7e-14	AFKDISIYFTKEEWAEMGDWEKTRYRNVKRNYNALITI	1/1:27:64	1.5e-15	AFKDISIYFTKEEWAEMGDWEKTRYRNVKRNYNALITI	1/1:27:64	9.7e-28	AFKDISIYFTKEEWAEMGDWEKTRYRNVKRNYNALITI
163	PRDM9 ortho	PRDM9	XP_517829	ptro	Pan troglodytes	Chimpanzee	Primates	PREDICTED: histone-lysine N-methyltransferase PRDM9 [Pan troglodytes]	MSPERSQEESPEEDTERTERKPMVKDAFKDISIYFTKEEWAEMGDWEKTRYRNVKRNYNALITIGLRATRPAFMCHRRQAIKLQVDDTEDSDEEWTPRQQVKPPLMALRVEQRKHQKGMPKASFSNESSLKELSRTANLLNASGSEQAQKPVSPPGEASTSGQHSRLKLELKKKETEGKMYSLRERKGHAYKEVSEPQDDDYLYCEMCQNFFIDSCAAHGPPTFVKDSAVDKGHPNRSALSLPPGLRIGPSGIPQAGLGVWNEASDLPLGLHFGPYKGRITEDEEAANNGYSWLVRRACHFPCSVFPHPFCAFEIRGYMGAEWYKDKEVHAPCGASALIGQTNSDVYVNCARDDEEQNLVAFQYHRQIFYRTCRVIRPGCELLVWYGDEYGQELGIKWG…			PF01352 [KRAB]	PF09514 [SSXRD]	PF00856 [SET]	PF00096 [ZnF_C2H2]	1/1:25:64	8.1e-10	KDAFKDISIYFTKEEWAEMGDWEKTRYRNVKRNYNALITI	1/1:27:64	1.1e-31	AFKDISIYFTKEEWAEMGDWEKTRYRNVKRNYNALITI	1/1:27:64	1.7e-14	AFKDISIYFTKEEWAEMGDWEKTRYRNVKRNYNALITI	1/1:27:64	1.5e-15	AFKDISIYFTKEEWAEMGDWEKTRYRNVKRNYNALITI	1/1:27:64	9.7e-28	AFKDISIYFTKEEWAEMGDWEKTRYRNVKRNYNALITI
164	PRDM9 ortho	-	A0A096N2F8	panu	Papio anubis	Olive baboon	Primates	Uncharacterized protein	MSPERSQEESPEEDTERTEWKPMVKDAFKDISIYFTKEEWAEMGDWEKTRYRNVKRNYNALITIGLRATRPAFMCHRRQAIKLQVDDTEDSDEEWTPRQQVKPPWMAVRVEQSKHQKGMPKASFNNESSLKEVSGMANLLNTSGSEQAQKPVSPPGEARTSGQHSRLKLELRRKETEGKMYSLRERKGHAYKEVSEPQDDDYLYCEMCQNFFIDSCAAHGPPTFIKDSAVEKGHPNRSALSLPPGLRIGPSGIPQAGLGVWNEASDLPLGLHFGPYEGRITQDEEAANNGYSWLITKGRNCYEYVDGKDKSWANWMRYVNCARDDEEQNLVAFQYHRQIFYRTCRVIRPGCELLVWYGDEYGQELGIKWGSKWKKELMAGREPKPEIHPCPSCCLAFSS…			PF01352 [KRAB]	PF09514 [SSXRD]	PF00856 [SET]	PF00096 [ZnF_C2H2]	1/1:25:64	8.1e-10	KDAFKDISIYFTKEEWAEMGDWEKTRYRNVKRNYNALITI	1/1:27:64	1.1e-31	AFKDISIYFTKEEWAEMGDWEKTRYRNVKRNYNALITI	1/1:27:64	1.7e-14	AFKDISIYFTKEEWAEMGDWEKTRYRNVKRNYNALITI	1/1:27:64	1.5e-15	AFKDISIYFTKEEWAEMGDWEKTRYRNVKRNYNALITI	1/1:27:64	9.7e-28	AFKDISIYFTKEEWAEMGDWEKTRYRNVKRNYNALITI
165	PRDM9 ortho		XP_023073990	ptep	Piliocolobus tephrosceles	Red colobus	Primates	LOW QUALITY PROTEIN: histone-lysine N-methyltransferase PRDM9	MSPERSQEESPEEDTERTERKPTVKDAFKDISIYFTKEEWAEMGDWEKTRYRNVKRNYNALITIGLRATRPAFMCHRRQAIKLQVDDTEDSDEEWTPRQQVKHPWMAVRVEQSKHQKGMPKASFNNESSLKEVSGTANVLNTSGSEQAQKPASPPGEARTSGRHSRLKLELRRKETDGKMYSLRERKGHAYKEVSEPQDDDYLYCEMCQNFFIDSCAVHGPPTFVKDSAVDKGHPNRSALSLPPGLRIGPSGIPQAGLGVWNEASDLPLGLHFGPYEGRITEDEEAANNGYSWLITKGRNCYEYVDGKDKSWANWMRYVNCARDDEEQNLVAFQYHRQIFYRTCRVIRPGCXNCWSGMGMSTARNWASNGAASGRKSSWQGENQSQRSIHVPHAVWPFQ…							1/1:25:64	8.1e-10	KDAFKDISIYFTKEEWAEMGDWEKTRYRNVKRNYNALITI	1/1:27:64	1.1e-31	AFKDISIYFTKEEWAEMGDWEKTRYRNVKRNYNALITI	1/1:27:64	1.7e-14	AFKDISIYFTKEEWAEMGDWEKTRYRNVKRNYNALITI	1/1:27:64	1.5e-15	AFKDISIYFTKEEWAEMGDWEKTRYRNVKRNYNALITI	1/1:27:64	9.7e-28	AFKDISIYFTKEEWAEMGDWEKTRYRNVKRNYNALITI
166	PRDM9 ortho	PRDM9	H2PF88	pabe	Pongo abelii	Sumatran orangutan	Primates	Uncharacterized protein	MSPERSQEESPEDDTERTERKPTVKDAFKDISIYFTKEEWAEMGDWEKTRYRNVKRNYNALITIGLRATRPAFMCHRRQAIKLQVDDTEDSDEEWTPRQQVKPPWMALRVEQRKHQKGMPKASFNNESSLKELSETANLLNASGSEQAQKPVSPPGEASTSGQHSRLKLELRSKETEGNTYSLRERKGHAYKEISEPQDDDYLYCEMCQNFFIDSCAAHGPPTFVKDSAVDKGHPNRSALTLPPGLRIGPSGIPQAGLGVWNEASDLPLGLHFGPYEGRITKDEEAANNGYSWLITKGRNCYEYVDGKDKSWANWMRYVNCARDDEEQNLVAFQYHRQIFYRTCRVIRPGCELLVWYGDEYGQELGIKWGSKWKKELMAGREPKPEIHPCPSCCLAFSS…			PF01352 [KRAB]	PF09514 [SSXRD]	PF00856 [SET]	PF00096 [ZnF_C2H2]	1/1:25:64	8.1e-10	KDAFKDISIYFTKEEWAEMGDWEKTRYRNVKRNYNALITI	1/1:27:64	1.1e-31	AFKDISIYFTKEEWAEMGDWEKTRYRNVKRNYNALITI	1/1:27:64	1.7e-14	AFKDISIYFTKEEWAEMGDWEKTRYRNVKRNYNALITI	1/1:27:64	1.5e-15	AFKDISIYFTKEEWAEMGDWEKTRYRNVKRNYNALITI	1/1:27:64	9.7e-28	AFKDISIYFTKEEWAEMGDWEKTRYRNVKRNYNALITI
167	PRDM9 ortho	PRDM7	A0A2J8RUW6	pabe	Pongo abelii	Sumatran orangutan	Primates	PRDM7 isoform 1	MSPERSQEESPKGDTERTERKPMVKDAFKDISIYFTKEEWTEMGDWEKTRYRNVKRNYKTLITIGLRATRPAFMCHRRQAIKLQVDDTEDSDEEWTPRQQVKPPWMAFRGEQSKHQKGMPKASFNNESSLKELSGTQNLLNTSGSEQAQKPVSPPGEASTSGQHSTLKIELRRKETEGKMYSLRERKGHAYKEVSEPQDDDYLYCEMCQNFFIDSCAAHGPPTFVKDSAVDKGHPNRSALSLPPGLRIGPSGIPQAGLGVWNEASDLPLGLHFGPYEGRITEDKEAANNGYSWLITKGRNCYEYVDGKDKSWANWMRYVNCAWDDEEQNLVAFQYHRQIFYRTCRVIRPGCELLVWYGDEYGQELGIKWGSKWKKELMPGRGLNKTSTLTKNFLFQNQS…			PF01352 [KRAB]	PF09514 [SSXRD]	PF00856 [SET]		1/1:25:64	5.4e-10	KDAFKDISIYFTKEEWTEMGDWEKTRYRNVKRNYKTLITI	1/1:27:64	1.6e-30	AFKDISIYFTKEEWTEMGDWEKTRYRNVKRNYKTLITI	1/1:27:64	3.2e-14	AFKDISIYFTKEEWTEMGDWEKTRYRNVKRNYKTLITI	1/1:27:64	2.2e-15	AFKDISIYFTKEEWTEMGDWEKTRYRNVKRNYKTLITI	1/1:27:64	1.1e-26	AFKDISIYFTKEEWTEMGDWEKTRYRNVKRNYKTLITI
168	PRDM9 ortho	PRDM7	A0A2K6ET94	pcoq	Propithecus coquereli	Coquerel's sifaka	Primates	Uncharacterized protein	MSPDKSQEESREVDKARTGWEPTDKDAFKDISIYFSKEEWAEMGDWEKIRYRNVKRNYNALITIGLRAPRPAFMCHRRQAIKHQVDDTEDSDEEWTPRQQVKRPWLAFRVEQSKHQKGMPGASLSDESSLKELPGTANLLNTSGSEQPQKPVSPPREANTSGQHSRRKLELRRKKIEVRVYSLRERKGHAYKEVSEPQDDDYLYCEKCQNFFIDSCAAHGPPTFVKDSAVDKGHPNRSALSLPPGLKIRPSGIPQAGLGVWNEASELPLGLHFGPYEGQVTEDEEAANSGYSWLITKGRNCYEYVDGKDDSWANWMRYVNCARDEEEQNLVAFQYHRQIFYRTCRVIRPGCELLVWYGDEYGRELASGRKTSPQGKNQSQRSIRVPHALWPSPVRNSSV…			PF01352 [KRAB]	PF09514 [SSXRD]	PF00856 [SET]		1/1:25:64	4e-09	KDAFKDISIYFSKEEWAEMGDWEKIRYRNVKRNYNALITI	1/1:27:64	4.9e-32	AFKDISIYFSKEEWAEMGDWEKIRYRNVKRNYNALITI	1/1:27:64	1.1e-15	AFKDISIYFSKEEWAEMGDWEKIRYRNVKRNYNALITI	1/1:27:64	8.6e-15	AFKDISIYFSKEEWAEMGDWEKIRYRNVKRNYNALITI	1/1:27:64	3.4e-28	AFKDISIYFSKEEWAEMGDWEKIRYRNVKRNYNALITI
169	PRDM9 ortho		XP_017708578	rbie	Rhinopithecus bieti	black-and-white snub-nosed monkey	Primates	PREDICTED: LOW QUALITY PROTEIN: probable histone-lysine N-methyltransferase PRDM7	MSPERSQEESPEEDTERTERKPTVKDAFKDISIYFTKEEWAEMGDWEKTRYRNVKRNYNALITIGLRATRPAFMCHRRQAIKLQVDDTEDSDEEWTPRQQVKPPWMAVRVEQSKHQKGMPKASLNNESSLKEVSGTANLLNTSGSEQAQKPVSPPGEARTSGRHSRLKLELRKKETEGKMYSLRERKGHAYKEVSEPQDDDYLYCEMCQNFFIDSCVAHGPPIFVKDSAVDKGHPNRSALSLPPGLRIGPSGIPQAGLGVWNEASDLPLGLHFGPYEGRITEDEEAANNGYSWLITKGRNCYEYVDGKDKSWANWMRYVNCARDDEEQNLVAFQYHRQIFYRTCRVIRPGCNCWSGMGMSMARNWASNGAASGRKSSWQGENQSQRSIHVPHAVWPFQV…				PF09514 [SSXRD]			1/1:25:64	8.1e-10	KDAFKDISIYFTKEEWAEMGDWEKTRYRNVKRNYNALITI	1/1:27:64	1.1e-31	AFKDISIYFTKEEWAEMGDWEKTRYRNVKRNYNALITI	1/1:27:64	1.7e-14	AFKDISIYFTKEEWAEMGDWEKTRYRNVKRNYNALITI	1/1:27:64	1.5e-15	AFKDISIYFTKEEWAEMGDWEKTRYRNVKRNYNALITI	1/1:27:64	9.7e-28	AFKDISIYFTKEEWAEMGDWEKTRYRNVKRNYNALITI
170	PRDM9 ortho	-	A0A2K6PC36	rrox	Rhinopithecus roxellana	golden snub-nosed monkey	Primates	Uncharacterized protein	MSLERSQEESPEEDTERTERKPTVKDAFKDISIYFTKEEWAEMGDWEKTRYRNVKRNYNALITIGLRATRPAFMCHRRQAIKLQVDDTEDSDEEWTPRQQVKPPWMAVRVEQSKHQKGMPKASLNNESSLKEVSGTANLLNTSGSEQAQKPVSPPGEARTSGRHSRLKLELRKKETEGKMYSLRERKGHAYKEVSEPQDDDYLYCEMCQNFFIDSCVAHGPPIFVKDSGVDKGHPNRSALSLPPGLRIGPSGIPQAGLGVWNEASDLPLGLHFGPYEGRITEDEEAANNGYSWLITKGRNCYEYVDGKDKSWANWMRYVNCARDDEEQNLVAFQYHRQIFYRTCRVIRPGCELLVWYGDEYGQELGIKWGSKWKKELMAGREPKPEIHPCPSCCLAFSS…			PF01352 [KRAB]	PF09514 [SSXRD]	PF00856 [SET]	PF00096 [ZnF_C2H2]	1/1:25:64	8.1e-10	KDAFKDISIYFTKEEWAEMGDWEKTRYRNVKRNYNALITI	1/1:27:64	1.1e-31	AFKDISIYFTKEEWAEMGDWEKTRYRNVKRNYNALITI	1/1:27:64	1.7e-14	AFKDISIYFTKEEWAEMGDWEKTRYRNVKRNYNALITI	1/1:27:64	1.5e-15	AFKDISIYFTKEEWAEMGDWEKTRYRNVKRNYNALITI	1/1:27:64	9.7e-28	AFKDISIYFTKEEWAEMGDWEKTRYRNVKRNYNALITI
171	PRDM9 ortho		XP_003945127	sbol	Saimiri boliviensis	Bolivian squirrel monkey	Primates	PREDICTED: probable histone-lysine N-methyltransferase PRDM7-like, partial [Saimiri boliviensis boliviensis]	MKQGLLDSPSTMSPERSQEESPGDTGRTEQKPMVKDAFKDVAIYFSKEEWAEMGDWEKTRCRNVQRNYNALITIGLRATQPAFMCHRRQASKLQVDDTEDSDEEWTPRRQ							1/1:35:74	2.6e-09	KDAFKDVAIYFSKEEWAEMGDWEKTRCRNVQRNYNALITI	1/1:37:74	7.3e-29	AFKDVAIYFSKEEWAEMGDWEKTRCRNVQRNYNALITI	1/1:37:74	2.8e-13	AFKDVAIYFSKEEWAEMGDWEKTRCRNVQRNYNALITI	1/1:37:74	2.4e-12	AFKDVAIYFSKEEWAEMGDWEKTRCRNVQRNYNALITI	1/1:37:74	1.7e-24	AFKDVAIYFSKEEWAEMGDWEKTRCRNVQRNYNALITI
172	PRDM9 ortho	PRDM7	A0A3Q0DPA6	tsyr	Tarsius syrichta	Philippine tarsier	Primates	LOW QUALITY PROTEIN: probable histone-lysine N-methyltransferase PRDM7	MSPDRSPEDSPEGDTGRTECKSAVKDAFKDISIYFTKEEWAEMGDWEKIRYRNVKRNYNTLIAIGLRAPRPAFMCHRKRAIKPLVDDTEDSDEEWTPRQQVKPPWMAFRVEQNKHQKGMPRAPLSIVSSLKELSEMANLLNTSDSEQAWKPVSPLREASTSEQHSRRKLEFRKKEIEVNMYSLRERKDCAYKEVNEPQDDDYLYCEQCQNFFIDSCATHGIPTFINDSAVDKGHPNRSALSLPPGLRIGPSGIPQAGLGVWNEASELPLGLHFGPYEGQITDDEEAANSGYSWLITKGRNCYEYVDGKDKSWANWMRYVNCARDDEEQNLVAFQYHRQIFYRTCRIIRPGCELLVWYGDEYGQELGIKWGSKWKKELMAGREPKPKIHPCSSCSLALSS…			PF01352 [KRAB]	PF09514 [SSXRD]	PF00856 [SET]	PF00096 [ZnF_C2H2]	1/1:25:64	1.8e-09	KDAFKDISIYFTKEEWAEMGDWEKIRYRNVKRNYNTLIAI	1/1:27:64	1.8e-31	AFKDISIYFTKEEWAEMGDWEKIRYRNVKRNYNTLIAI	1/1:27:64	2.9e-15	AFKDISIYFTKEEWAEMGDWEKIRYRNVKRNYNTLIAI	1/1:27:64	1.4e-15	AFKDISIYFTKEEWAEMGDWEKIRYRNVKRNYNTLIAI	1/1:27:64	1.5e-28	AFKDISIYFTKEEWAEMGDWEKIRYRNVKRNYNTLIAI
173	PRDM9 ortho	PRDM9	XP_005998057	lcha	Latimeria chalumnae	Coelacanth	Sarcopterygii (lobe-finned fishes)	PREDICTED: histone-lysine N-methyltransferase PRDM9-like [Latimeria chalumnae]	MSSEEEKFKDISIYFSEEEWETLGKWEKFRYQNMKQNYETMIALGLNVPKPAFMLHRGLAKHYSYDSSDSDEEWIPKPVNPVPVKTFRPPFKTTAVEKNSTKLKNVSQYKRIRAKTPSDGKSVFRRNAEISSVFESDSDEDQDFEFKGFTEEDLGSLFALNLKAPSPPDSKDEEKPSTSTSGSQNFNVSKPIVAETSSAKETTRKETPGTAYSLRQREKKVYFEIDELQDDDYLFCEECQTFFVEECPVHGPPVFVNDTVVAWGQEGRAQLTLPEGMSISPSQIPKAGLGVWNEAKAILKGVHFGPYEGEITEEEEAAHSGYSWVITKGKNYYEYIDAKDEDKSNWMRYVNCAREEEEQNLVAFQHHGKIFYRSCRQILPGRELLVWYGDDYGKELGIK…			PF01352 [KRAB]		PF00856 [SET]	PF00096 [ZnF_C2H2]	1/1:5:44	1e-10	EEKFKDISIYFSEEEWETLGKWEKFRYQNMKQNYETMIAL	1/1:7:44	2.7e-26	KFKDISIYFSEEEWETLGKWEKFRYQNMKQNYETMIAL	1/1:7:44	4e-16	KFKDISIYFSEEEWETLGKWEKFRYQNMKQNYETMIAL	1/1:7:44	1.2e-13	KFKDISIYFSEEEWETLGKWEKFRYQNMKQNYETMIAL	1/1:7:44	6.7e-24	KFKDISIYFSEEEWETLGKWEKFRYQNMKQNYETMIAL
174	PRDM9 ortho		paPRDM9(contig164562;frame_R3; nt3-1067)	pann	Protopterus annectens	West African lungfish	Sarcopterygii (lobe-finned fishes)		PKMKRTAKISSEDKEMFGDISGYFSREEWETMGHWERVRYKNMKRNYDAMIEIGLIVPKPAFMSRRFHDLHHVDDPSDSDEEWTPDIQYTVSSSNPRPSLKSESGKWTSQKLNSVNKIKRRNCERNNGNQPRGTGYKELLALFDSDTDGDQDKEFKGFSAEELHPLLTSSHNAAITPEHENARNKSNSKVKDEFSAGKMLGSCFGGADDNFVDEMENSRYGFFXXXXRRRYKKVYAEIDELKDDEFLYCEECQAFFVEECTIHGPPVFIKDKIVEPGQANRASCTLPDGMAIRPSGIPGAGLGVFNEGSTIPKGVHFGPYEGEITDEETSASSGYSWMIVKGKGKFEYIDAKNERTSNWMRYVNCARN							1/1:14:53	8.1e-07	KEMFGDISGYFSREEWETMGHWERVRYKNMKRNYDAMIEI	1/1:16:53	6.6e-27	MFGDISGYFSREEWETMGHWERVRYKNMKRNYDAMIEI	1/1:16:53	1.1e-15	MFGDISGYFSREEWETMGHWERVRYKNMKRNYDAMIEI	1/1:16:53	2.9e-12	MFGDISGYFSREEWETMGHWERVRYKNMKRNYDAMIEI	1/1:16:53	3.6e-24	MFGDISGYFSREEWETMGHWERVRYKNMKRNYDAMIEI
175	PRDM9 ortho		XP_028598102adj	pmur	Podarcis muralis	Common wall lizard	Squamata	PREDICTED: Podarcis muralis zinc finger protein 493-like (LOC114603357)(with SET and ZnF domains)	GERHLTKTIPRGRGQLRLNGLFPVGEISWRKIPGIREESPWRKEPVGHHLLLILFLRKSAKGGKTGSGSPKNSCLDRGSTEKVKKPSHKKRGQKPKAEDTFKGLAIYFPKEQWAEMGEWEKIRYKNMKENYEFMTQLGLPTPKPTFMYHARQPPKTTDESSESDEEWTPKSIVKSFRTPCNLNSWKEEKKKKYPLDQNKQINTMGLTSKDQEHIKKTDKNTCADVHTTDIAAESKTDIEKKALSGKTKNRKRDQEKEVSTYSLRKRERKTYMEINEPNDDDYLFCEYCLLFFIDECSVHGSPVFIKDTAVEIGLEERATLTLPPGLRIGPSGIPKAGFGVWNEGEILPPGIHFGPYEGKITEEEEAANSGYSWLITRGQNCYVYIDGKDETNSNWMRYV…							1/1:98:137	1e-06	EDTFKGLAIYFPKEQWAEMGEWEKIRYKNMKENYEFMTQL	1/1:100:137	9.7e-27	TFKGLAIYFPKEQWAEMGEWEKIRYKNMKENYEFMTQL	1/1:100:137	2.1e-14	TFKGLAIYFPKEQWAEMGEWEKIRYKNMKENYEFMTQL	1/1:100:137	3e-12	TFKGLAIYFPKEQWAEMGEWEKIRYKNMKENYEFMTQL	1/1:100:137	1.3e-24	TFKGLAIYFPKEQWAEMGEWEKIRYKNMKENYEFMTQL
176	PRDM9 ortho		XP_020663556	pvit	Pogona vitticeps	central bearded dragon	Squamata	PREDICTED: Pogona vitticeps histone-lysine N-methyltransferase PRDM9-like (LOC110086747), transcript variant X1	MPTQGFEGDTPTEAEAPGEWQEMLSEGKTQDVWQGTPERADIQGLEGEMRREVETQEQKDDVSKRGEAQEWKGETSDRNEAPEEMAIETEGQVLNGQRSMEIDPKDQGGPPLKEKASGGSPNFLLAKGAEGGGRGSGINKSSTGEKPSTKKGKKQNTKKKGQKAKAEDTFKGLSIYFSKEQWAEMGEWEKIRYKNIKENYEFMTQLGLPAPKPAFMYYARQTFKTANESSESDEEWTPKPIVKSFRIPPYIPSSLKEEEKKKNFLTQNKQINTMEPMLQNQDVKKIEKHVSVDVSVETIDPAAESKTDFKRQAVSWEKENQTREQDKKISMYSLRKREKKTYMEINEPNDDDYLFCEHCQVFFTDECSVHGAPVFIEDSAAEIGLEKRAWLTLPPGLRI…							1/1:167:206	1.8e-06	EDTFKGLSIYFSKEQWAEMGEWEKIRYKNIKENYEFMTQL	1/1:169:206	2.5e-27	TFKGLSIYFSKEQWAEMGEWEKIRYKNIKENYEFMTQL	1/1:169:206	3e-14	TFKGLSIYFSKEQWAEMGEWEKIRYKNIKENYEFMTQL	1/1:169:206	6.6e-13	TFKGLSIYFSKEQWAEMGEWEKIRYKNIKENYEFMTQL	1/1:169:206	8e-25	TFKGLSIYFSKEQWAEMGEWEKIRYKNIKENYEFMTQL
177	PRDM9 ortho		XP_025023857	pbiv	Python bivittatus	Burmese python	Squamata	histone-lysine N-methyltransferase PRDM9	MPTGAESQREWGELLIGSEAQGTGQEVPPETEVEGVWEVNPSMQMEAESQGQSKDTSSGAAAQGMRGQILDKNDFAGERAVETEGYVPTGKRLLETDPRIWTGKSLIEDVSGSSVVSITIEAGGVKKGTKKNSSGDRSKKQTNKKKGKKSKAEDKFKEISIYFPKEQWAEMGEWEKLRYKNMKHNYEFMIQLGLPTPKPAFMYYARHPLKTTNESSESDEEWTPTLIDFQRKAVPEKKKERKKEQKKEISTYRLRKRERKTYMEINEPNDDDYLYCEYCLTFFVEECSVHGPPLFIRDTLAELGLADRATFTLPSGFRIGLSSIPRAGFGVWNEREILPPGIHFGPYEGTMTEEEEAANSGYSWMITREQNCYIYVDGKNETSSNWMRYVNCARNEEEQ…							1/1:153:192	5.1e-06	EDKFKEISIYFPKEQWAEMGEWEKLRYKNMKHNYEFMIQL	1/1:155:192	9.1e-28	KFKEISIYFPKEQWAEMGEWEKLRYKNMKHNYEFMIQL	1/1:155:192	4.9e-14	KFKEISIYFPKEQWAEMGEWEKLRYKNMKHNYEFMIQL	1/1:155:192	9.8e-13	KFKEISIYFPKEQWAEMGEWEKLRYKNMKHNYEFMIQL	1/1:155:192	1.3e-23	KFKEISIYFPKEQWAEMGEWEKLRYKNMKHNYEFMIQL
178	PRDM9 ortho		XP_007053470	cmyd	Chelonia mydas	Green sea turtle	Testudines	histone-lysine N-methyltransferase PRDM9 (LOC102932627)	MSDNAGEGRASEKRKEQKSRKAGESSKVEDEFKELSIYFPKEQWAEMGDWEKTRYRNMKRNYEFMVELGLPTPKPAFMCRGRRPPNPIIYDSESDEDWTPKPLVKTFRPPCKSGSMKQEKKKRQNVSQNEKAMLEKASEKEVSENQTNAEKVDKNSDVGTRIPVTNVVVLKTDLPRLAVSKTQGQSTQVNTYSLRKREKKVYVEISEPQDDDYLFCEDCLTFFIDECSVHGPPVFIRDPIVETGQERRAALTLPPGMRIGLSSIPQAGLGVWNEADTLPVGVHFGPYDGRITEEEEAAHNGYSWLITKGRNWYVYIDGKDEMNANWMRYVNCARDEEEQNLVAFQYRGKIYYRVCRAILPHCELLVWYGDEYGKELGIKWGTRWKSTAPPKVHGQDPHC…				PF09514 [SSXRD]		PF00096 [ZnF_C2H2]	1/1:29:68	3e-06	EDEFKELSIYFPKEQWAEMGDWEKTRYRNMKRNYEFMVEL	1/1:31:68	1.7e-28	EFKELSIYFPKEQWAEMGDWEKTRYRNMKRNYEFMVEL	1/1:31:68	3.2e-14	EFKELSIYFPKEQWAEMGDWEKTRYRNMKRNYEFMVEL	1/1:31:68	6.7e-13	EFKELSIYFPKEQWAEMGDWEKTRYRNMKRNYEFMVEL	1/1:31:68	1.4e-24	EFKELSIYFPKEQWAEMGDWEKTRYRNMKRNYEFMVEL
179	PRDM9 ortho		XP_005314362	cpic	Chrysemys picta bellii	western painted turtle	Testudines	histone-lysine N-methyltransferase PRDM9-like	MSDNAGEGRASEKRKEQKGRKAGESSKVEDEFKELSIYFPKEQWAEMGAWEKTRYRNMKRNYEFMVELGLPTPKPAFMCRGRRPQNPIIYDSESDEDWTPKPLDLPRLAVSKTQGQSTQVNTYSLRKREKKVYVEINEPQDDDYLFCEICLTFFIDECSVHGPPVFIKDPIVETGQERRAALTLPPGMRIGLSSIPQAGLGVWNEADTLPIGVHFGPYDGRITEDEEAAHNGYSWLITKGRNWYVYIDGKDETNANWMRYVNCARDEEEQNLVAFQYHGKIYYRVCRPILPHSELLVWYGDEYGKELGIKWGTRWKSTAPPKVRGQDLHCYPCPCCRLAFSSKDYLRQHLKYKHLPTELQTEEDEGALGGESCLKTRGLSFPGDPPSQQLPPNPSSLHK…							1/1:29:68	3e-06	EDEFKELSIYFPKEQWAEMGAWEKTRYRNMKRNYEFMVEL	1/1:31:68	1.4e-27	EFKELSIYFPKEQWAEMGAWEKTRYRNMKRNYEFMVEL	1/1:31:68	1.7e-14	EFKELSIYFPKEQWAEMGAWEKTRYRNMKRNYEFMVEL	1/1:31:68	2.6e-12	EFKELSIYFPKEQWAEMGAWEKTRYRNMKRNYEFMVEL	1/1:31:68	6.3e-24	EFKELSIYFPKEQWAEMGAWEKTRYRNMKRNYEFMVEL
180	PRDM9 ortho	PRDM7	A0A452HTB4	gaga	Gopherus agassizii	Agassiz's desert tortoise	Testudines	PR/SET domain 7	ETPATRFSECVEGAAGKVEDEFKELSIYFPKEQWTEMGAWEKTRYRNMKRNYEFMVELGERASLPTPKPAFMCRGRRPQNPIVYDSESDEDWMPKPLGNRYNSPLDLPRLAASKTPGQSTQVNTYSLRKREKKVYVEINEPQDDDYLFCEACLTFFIDECSVHGPPVFIKDPTVETGQERRAALTLPPGMRIGLSSIPQAGLGVWNEAGTLPIGVHFGPYDGRITEEEEAAHNGYSWLITKGRNWYVYIDGKDETNANWMRYVNCARDEEEQNLVAFQYHGKIYYRVCRAILPHCELLVWYGDEYGKELGIKWGTRWKSTAPPKVRGQDPHCHPCPRCRLAFSSKDYLSQHLKRKHLPTELQSEEDEGALGGESCPKTRGLSFPGDPASQQLPPDPSSL…				PF09514 [SSXRD]		PF00096 [ZnF_C2H2]	1/1:19:58	3.7e-06	EDEFKELSIYFPKEQWTEMGAWEKTRYRNMKRNYEFMVEL	1/1:21:58	4e-27	EFKELSIYFPKEQWTEMGAWEKTRYRNMKRNYEFMVEL	1/1:21:58	4.4e-14	EFKELSIYFPKEQWTEMGAWEKTRYRNMKRNYEFMVEL	1/1:21:58	3.4e-12	EFKELSIYFPKEQWTEMGAWEKTRYRNMKRNYEFMVEL	1/1:21:58	3.4e-23	EFKELSIYFPKEQWTEMGAWEKTRYRNMKRNYEFMVEL
181	PRDM9 ortho	-	K7F2W1	psin	Pelodiscus sinensis	Chinese softshell turtle	Testudines	Uncharacterized protein	VKDEFQEVSIYFPKDQWAEMGDWEKTRYRNMKQNYEFMVALGLPTPKPAFMCRGRWPRNPIIYDSESDEDWTPKPLAFPPWRTDTEKLDKKSEVCTRIPATNVADLKTGSGLDSLIVREWSPHPQIRSPAGHSTHTHTVAVSKAQGQNTQVNTYSLRKRERKVYAEINEPQDDDYLFCEACLTFFTDECSVHGPPVFIKDPVVETGQERRAALTLPPGMRIGLSSIPQAGLGVWNEADTLPVGVHFGPYDGRITEEEEAAHNGYSWLITRGRNWYMYIDGKDEANANWMRYVNCARDEEEQNLVAFQYHGKIYYRVCRAIPPHCELLVWYGDEYGKELGIKWGTRWKSAAPPKDTVRGQEPHCHPCPRCRLAFSSKDYLSQHLKHKHLPTGLQTEEDAL…			PF01352 [KRAB]	PF09514 [SSXRD]	PF00856 [SET]	PF00096 [ZnF_C2H2]	1/1:2:41	9.2e-07	KDEFQEVSIYFPKDQWAEMGDWEKTRYRNMKQNYEFMVAL	1/1:4:41	3.9e-28	EFQEVSIYFPKDQWAEMGDWEKTRYRNMKQNYEFMVAL	1/1:4:41	1.8e-13	EFQEVSIYFPKDQWAEMGDWEKTRYRNMKQNYEFMVAL	1/1:4:41	5.3e-14	EFQEVSIYFPKDQWAEMGDWEKTRYRNMKQNYEFMVAL	1/1:4:41	6.6e-25	EFQEVSIYFPKDQWAEMGDWEKTRYRNMKQNYEFMVAL
182	PRDM9 ortho	-	A0A4D9DMI7	pmeg	Platysternon megacephalum	big-headed turtle	Testudines	Dihydroorotase	MSDNAGEGRASEKRKEQKSRKAGESSKVEDEFKELSIYFPKEQWAEMGAWEKTRYRNMKQNYEFMVELGLPTPKPAFMCRGRRPQNPIIYDSESDEDWTPKPLVKTFRPPRKSGSLKQEKKKRQNISQNEKTVLEKASEKEASENQTDTEKLEKNSDVGTRIPVTNVVDLKTVCEACLTFFIDECSVHGPPVFIKDPIVETGQERRAALTLPPGMRIGLSSIPQAGLGVWNEADTLPIGVHFGPYDGRITEEEEAAHNGYSWLITKGRNWYVYIDGKDETNANWMRYVNCARDEEEQNLVAFQYHGKIYYRVCRAILPHCELLVWYGDEYGKELGIKWGTRWKSTAPPKGTRLQPRSG			PF01352 [KRAB]		PF00856 [SET]		1/1:29:68	2.2e-06	EDEFKELSIYFPKEQWAEMGAWEKTRYRNMKQNYEFMVEL	1/1:31:68	2.9e-27	EFKELSIYFPKEQWAEMGAWEKTRYRNMKQNYEFMVEL	1/1:31:68	1.1e-13	EFKELSIYFPKEQWAEMGAWEKTRYRNMKQNYEFMVEL	1/1:31:68	1.8e-12	EFKELSIYFPKEQWAEMGAWEKTRYRNMKQNYEFMVEL	1/1:31:68	2.9e-23	EFKELSIYFPKEQWAEMGAWEKTRYRNMKQNYEFMVEL
183	PRDM9 ortho	PRDM9	XP_026502906	tcar	Terrapene carolina triunguis	Three-toed box turtle	Testudines	histone-lysine N-methyltransferase PRDM9 (LOC112107996), partial mRNA	MSDNAGEGRASEKRKEQKGRKAGESSKVEDEFKELSIYFPKEQWAEMGAWEKTRYRNMKRNYEFMVELGLPTQKPAFMCRGRRPQNPIIYDSESDEDWTPKPLVKTFRPPRKSGSLKQEKKKRQNISHNEKTVLEKASENQTDTEKLDKNSDVGTRIPVTNVVDLKTDLPRLAVSKTQGQSTQVNTYSLRKREKKVYVEINEPQDDDYLFCETCLIFFIDECSVHGPPVFIKDPIVETGQERRAALTLPPGMRIGLSSIPQAGLGVWNEADTLPIGVHFGPYDGRITEDEEAAHNGYSWLITKGRNWYVYIDGKDETNANWMRYVNCARDEEEQNLVAFQYHGKIYYRVCRAILPHSELLVWYGDEYGKELGIKWGTRWKSTAPPKVRGQDPHCYPCPR…							1/1:29:68	3e-06	EDEFKELSIYFPKEQWAEMGAWEKTRYRNMKRNYEFMVEL	1/1:31:68	1.4e-27	EFKELSIYFPKEQWAEMGAWEKTRYRNMKRNYEFMVEL	1/1:31:68	1.7e-14	EFKELSIYFPKEQWAEMGAWEKTRYRNMKRNYEFMVEL	1/1:31:68	2.6e-12	EFKELSIYFPKEQWAEMGAWEKTRYRNMKRNYEFMVEL	1/1:31:68	6.3e-24	EFKELSIYFPKEQWAEMGAWEKTRYRNMKRNYEFMVEL
184	SSX ortho/para		ENSAMEP00000013477	amel	Ailuropoda melanoleuca	Giant panda	Mammalia	Uncharacterized protein	MNKGSFFANNSMEDTQISEKKSKAFKDISKYFSKEEWANLGYSDKITYVYMKRNYDTMTSLGLRATLPAFMCPKIQAVKSNGHDSDGNQKPKNQVQLPHPFNSNLPRNIKKVMLKKQIKEESDWEEIPIAPGSEQAQKELYPPEKESTSNQQSENTPGKRGNSIWASRLRERKNLVVYEEISDPEEDD		IPR003655 [KRAB-related]	IPR001909 [KRAB]	IPR019041 [SSXRD]			1/1:22:61	1e-07	SKAFKDISKYFSKEEWANLGYSDKITYVYMKRNYDTMTSL	1/1:24:61	2.6e-18	AFKDISKYFSKEEWANLGYSDKITYVYMKRNYDTMTSL	1/1:24:61	6.3e-24	AFKDISKYFSKEEWANLGYSDKITYVYMKRNYDTMTSL	1/1:24:61	5.8e-11	AFKDISKYFSKEEWANLGYSDKITYVYMKRNYDTMTSL	1/1:24:61	8.9e-27	AFKDISKYFSKEEWANLGYSDKITYVYMKRNYDTMTSL
185	SSX ortho/para		A0A383ZZ32	bacu	Balaenoptera acutorostrata scammoni	North Pacific minke whale	Mammalia	103013356 [Gene Symbol: LOC103013356] [Locus Tag: ] [Chromosome: Un] [Map Location: ] [Description: protein SSX1-like] [Gene Type: protein-coding]	MNRGSSFAKSPREYSHKSENSKAFKDISKYFPKKEWADLGYSEKITYVCMKRNYDIMTDLDEPAQEASNMQERKHLKVMPKKPEKKKNPSKLVPATSGSEQAQKQLRSPEKADTSGQQSKKTSGKRKLFGNNSSGFPGPVQVHGLGPKGRKINVRTHRLRERKNVVIYEEISDPEEDD				PF09514 [SSXRD]			1/1:21:60	1.1e-05	SKAFKDISKYFPKKEWADLGYSEKITYVCMKRNYDIMTDL	1/1:23:60	3e-18	AFKDISKYFPKKEWADLGYSEKITYVCMKRNYDIMTDL	1/1:23:60	7.6e-23	AFKDISKYFPKKEWADLGYSEKITYVCMKRNYDIMTDL	1/1:23:60	3.7e-10	AFKDISKYFPKKEWADLGYSEKITYVCMKRNYDIMTDL	1/1:23:60	6.6e-26	AFKDISKYFPKKEWADLGYSEKITYVCMKRNYDIMTDL
186	SSX ortho/para		A0A4W2FB30	bixbt	Bos indicus x Bos taurus	hybrid cattle	Mammalia	113887566 [Gene Symbol: LOC113887566] [Locus Tag: ] [Chromosome: X] [Map Location: ] [Description: protein SSX1-like] [Gene Type: protein-coding]	MNRGSFWENPREDRKKLEKKSKTFKTISQYFSKKEWARLGYSEKITYVNMKRNYETMTRLGLQCTPPAFMCPKNGATKSKRCDSKTKNPREKDEPPQGTSNMQGGKCQKVMPKKPVKGKKRSKIVPGTSGPEQAQRQLRSQAKASISAQQSKKTAGSKKKKVSAIRLRERKPVAYEEISDPEEESNGNTVDVWANRGQKREPVAQEEISDHEEESNRNTVNVWANRLRKRKPVAYEEISDPEEEEDEDD				PF09514 [SSXRD]			1/1:21:60	1.3e-06	SKTFKTISQYFSKKEWARLGYSEKITYVNMKRNYETMTRL	1/1:23:60	1.3e-21	TFKTISQYFSKKEWARLGYSEKITYVNMKRNYETMTRL	1/1:23:60	3e-22	TFKTISQYFSKKEWARLGYSEKITYVNMKRNYETMTRL	1/1:23:60	1e-09	TFKTISQYFSKKEWARLGYSEKITYVNMKRNYETMTRL	1/1:23:60	5.1e-26	TFKTISQYFSKKEWARLGYSEKITYVNMKRNYETMTRL
187	SSX ortho/para		Q32L84	btau	Bos taurus	domestic Cow	Mammalia	767992 [Gene Symbol: SSX5] [Locus Tag: ] [Chromosome: X] [Map Location: ] [Description: synovial sarcoma, X breakpoint 5] [Gene Type: protein-coding]	MNRGSFWENPREDRKKLEKKSKTFKTISQYFSKKEWARLGYSEKITYVNMKRNYETMTRLGLQCTPPAFMCPKNGATKSKRCDSKTKNPREKDEPPQGTSNMQGGKCQKVMPKKPVKGKKRSKIVPGTSGPEQAQRQLRSQAKASISAQQSKKTAGSKKKKVSAIRLRERKPVAYEEISDPEEESNGNTVDVWANRGQKREPVAQEEISDHEEESNRNTVNVWANRLRKRKPVAYEEISDPEEEEDEDD				PF09514 [SSXRD]			1/1:21:60	1.3e-06	SKTFKTISQYFSKKEWARLGYSEKITYVNMKRNYETMTRL	1/1:23:60	1.3e-21	TFKTISQYFSKKEWARLGYSEKITYVNMKRNYETMTRL	1/1:23:60	3e-22	TFKTISQYFSKKEWARLGYSEKITYVNMKRNYETMTRL	1/1:23:60	1e-09	TFKTISQYFSKKEWARLGYSEKITYVNMKRNYETMTRL	1/1:23:60	5.1e-26	TFKTISQYFSKKEWARLGYSEKITYVNMKRNYETMTRL
188	SSX ortho/para		ENSBTAP00000042576	btau	Bos taurus	domestic Cow	Mammalia	Uncharacterized protein	MNRDSFSENPREDRKKLEKKSKTLKNISKYFSMKEGARLGYSEKTTYVNMKRNYETMTRLGNRKGTPAALMCPNNGATKSKHCDSKTKNPREKDEPPQGTSNMQGGKCQKVMPKKPVKGKKRSKIVPGTSGPEQAQRQLRSQAKASISAQQSKKTAGSKKKKVSAIRLRERKPVAYEEISDPEEESNGNTVDVWANRGQKREPVAQEEISDHEEESNRNTVNVWANRLRKRKPVAYEEISDPEEEEDEDD		IPR003655 [KRAB-related]	IPR001909 [KRAB]	IPR019041 [SSXRD]			1/1:21:60	3.1e-05	SKTLKNISKYFSMKEGARLGYSEKTTYVNMKRNYETMTRL	1/1:23:60	1.1e-15	TLKNISKYFSMKEGARLGYSEKTTYVNMKRNYETMTRL	1/1:23:60	1.4e-18	TLKNISKYFSMKEGARLGYSEKTTYVNMKRNYETMTRL	1/1:23:60	1.1e-06	TLKNISKYFSMKEGARLGYSEKTTYVNMKRNYETMTRL	1/1:23:60	3.9e-21	TLKNISKYFSMKEGARLGYSEKTTYVNMKRNYETMTRL
189	SSX ortho/para		A0A3Q7N257	curs	Callorhinus ursinus	northern fur seal	Mammalia	112812993 [Gene Symbol: LOC112812993] [Locus Tag: ] [Chromosome: Un] [Map Location: ] [Description: putative protein SSX6] [Gene Type: protein-coding]	MNKGGSFSKNSKEDTEKSEKKCKAFKDISKYFSKEEWANLGYSDKITYVYMKRNYDTMASLGLKATLPDFMCPKKRANESSGCDSDEDQNPKNQGEPPQGPSDVQDQKQMKVMLEKQIKEESDSEPIPITPGSEQPQKELCPLGKASTSGQESENIPGPRKRMSSIWACRLRERKNLIVYEEISDPEEDD			PF01352 [KRAB]	PF09514 [SSXRD]			1/1:22:61	1.5e-07	CKAFKDISKYFSKEEWANLGYSDKITYVYMKRNYDTMASL	1/1:24:61	4.2e-18	AFKDISKYFSKEEWANLGYSDKITYVYMKRNYDTMASL	1/1:24:61	2.8e-23	AFKDISKYFSKEEWANLGYSDKITYVYMKRNYDTMASL	1/1:24:61	8.1e-11	AFKDISKYFSKEEWANLGYSDKITYVYMKRNYDTMASL	1/1:24:61	4.9e-26	AFKDISKYFSKEEWANLGYSDKITYVYMKRNYDTMASL
190	SSX ortho/para		A0A4V6AD37	cdro	Camelus dromedarius	dromedary	Mammalia	KRAB-related domain-containing protein	MKFTACSDWFTVLGPRNCGISSHREAAIRHRSPLRTFDLVDREIQVVFLRDQTNPSTMNRGSSFVKNSCDDTQKLEKKSKAFKDISKYFSKEEWANLAYSQKITYVYMKRNYETMTGLGLKASMPNFMCPRRPTIKFREHDSEDKNPGNQKEFPQEVFNMQERKQLKVIPEKREKETSGSEQAPKQLCPLQKEVSSDQQIKEIPGPKIERVKVWANRLRERKHRVIYEEISDPEEDD							1/1:79:118	3e-08	SKAFKDISKYFSKEEWANLAYSQKITYVYMKRNYETMTGL	1/1:81:118	3.3e-17	AFKDISKYFSKEEWANLAYSQKITYVYMKRNYETMTGL	1/1:81:118	4.6e-24	AFKDISKYFSKEEWANLAYSQKITYVYMKRNYETMTGL	1/1:81:118	1.5e-09	AFKDISKYFSKEEWANLAYSQKITYVYMKRNYETMTGL	1/1:81:118	1.9e-25	AFKDISKYFSKEEWANLAYSQKITYVYMKRNYETMTGL
191	SSX ortho/para		S9XNZ4	cfer	Camelus ferus	wild Bactrian camel	Mammalia	KRAB-related domain-containing protein	MKFTACSDWFTVLGPRNCGISSHREAAIRHRSPLRTFDLVDREIQVVFLRDQTNPSTMNRGSSFVKNSCDDTQKLEKKSKAFKDISKYFSKEEWANLAYSQKITYVYMKRNYETMTGLGPKIERVKVWANRLRERKHRVIYEEISDPEEDD			PF01352 [KRAB]	PF09514 [SSXRD]			1/1:79:118	3e-08	SKAFKDISKYFSKEEWANLAYSQKITYVYMKRNYETMTGL	1/1:81:118	3.3e-17	AFKDISKYFSKEEWANLAYSQKITYVYMKRNYETMTGL	1/1:81:118	4.6e-24	AFKDISKYFSKEEWANLAYSQKITYVYMKRNYETMTGL	1/1:81:118	1.5e-09	AFKDISKYFSKEEWANLAYSQKITYVYMKRNYETMTGL	1/1:81:118	1.9e-25	AFKDISKYFSKEEWANLAYSQKITYVYMKRNYETMTGL
192	SSX ortho/para		E2RJV8	cfam	Canis familiaris	Dog	Mammalia	612524 [Gene Symbol: LOC612524] [Locus Tag: ] [Chromosome: X] [Map Location: ] [Description: putative protein SSX6] [Gene Type: protein-coding]	MNKDSSFAKSSREDTQKSEKKCKAFKDISKYFSKEEWAKLGYSDKITYVYMKRNYDTMTGLGLRATLPAFMCPKKRAIKSKRHDSDENENHRNQNEPLQEVSNVKKRKHQKVMLKTVKEEEDSDPIPITPGFEQAQKVLCLPGKASTSDQQSEIIPGPKRGKNSIWAYRLRERKNLVVYEEISDPEEED			PF01352 [KRAB]	PF09514 [SSXRD]			1/1:22:61	1.4e-06	CKAFKDISKYFSKEEWAKLGYSDKITYVYMKRNYDTMTGL	1/1:24:61	3.6e-18	AFKDISKYFSKEEWAKLGYSDKITYVYMKRNYDTMTGL	1/1:24:61	1.6e-24	AFKDISKYFSKEEWAKLGYSDKITYVYMKRNYDTMTGL	1/1:24:61	4e-10	AFKDISKYFSKEEWAKLGYSDKITYVYMKRNYDTMTGL	1/1:24:61	9.4e-27	AFKDISKYFSKEEWAKLGYSDKITYVYMKRNYDTMTGL
193	SSX ortho/para		A0A452F5D5	chir	Capra hircus	Domestic Goat	Mammalia	KRAB-related domain-containing protein; histone-lysine N-methyltransferase PRDM9 according to ENSEMBL	MNSGSFYETPREDRKKLEKKSKSFKNISKYFSKKEWARLGYSEKITYVNLKRNYETMTRLGLKCTLPAFMCPKNGATESKHCDSKIKNPREKDEPAEGTSNMQGRKRQKVMSKKPVKGKKHSKIVPGTSGPEQAQRQLRSQTKASISAQQSKKTSGSKRTVNVWAQRLRKRKPVAYEEMSDSEEESERKKVDVWANRLLRKRQLVAYEEISDSEEESERKAVNVWANRLRKRQPVAYEEIKIRDSEEESERKTKDGNDDPVCKTAKKTQMCIADFWTLWERERVG				PF09514 [SSXRD]			1/1:21:60	5.6e-06	SKSFKNISKYFSKKEWARLGYSEKITYVNLKRNYETMTRL	1/1:23:60	5.4e-20	SFKNISKYFSKKEWARLGYSEKITYVNLKRNYETMTRL	1/1:23:60	4.8e-22	SFKNISKYFSKKEWARLGYSEKITYVNLKRNYETMTRL	1/1:23:60	7.4e-10	SFKNISKYFSKKEWARLGYSEKITYVNLKRNYETMTRL	1/1:23:60	3.6e-25	SFKNISKYFSKKEWARLGYSEKITYVNLKRNYETMTRL
194	SSX ortho/para		A0A452G2L0	chir	Capra hircus	Domestic Goat	Mammalia	102186391 [Gene Symbol: LOC102186391] [Locus Tag: ] [Chromosome: Un] [Map Location: ] [Description: protein SSX1-like] [Gene Type: protein-coding]	MNRGSFYETPREDRKKLEKKSKSFKNISKYFSKKEWARLGYSEKVTYVNLKRNYETMTRLGLKCTPPAFMCPKNGATESKHCDSKIKNPREKDEPAEGTSNMQGRKRQKVMPKKPVKGKKRSKIVPGTSGPEQAQRQLRSQTKASISAQQSKKTSGKRYNLSYLFGNKSSVFPGHVQVNGLTVNVWANRLRKRKPVAYEEISDPEEED				PF09514 [SSXRD]			1/1:21:60	5.3e-06	SKSFKNISKYFSKKEWARLGYSEKVTYVNLKRNYETMTRL	1/1:23:60	5.1e-20	SFKNISKYFSKKEWARLGYSEKVTYVNLKRNYETMTRL	1/1:23:60	1.5e-21	SFKNISKYFSKKEWARLGYSEKVTYVNLKRNYETMTRL	1/1:23:60	6.4e-10	SFKNISKYFSKKEWARLGYSEKVTYVNLKRNYETMTRL	1/1:23:60	9.8e-25	SFKNISKYFSKKEWARLGYSEKVTYVNLKRNYETMTRL
195	SSX ortho/para		ENSCPOP00000019990	cpor	Cavia porcellus	Guinea pig	Mammalia	Uncharacterized protein	MNTDSSFAKSPTENTVKPQKKYRAFADISKYFSRNQWKKMSYSDKVTCVYLKRNYTTMTRLGLRVSLPTFMRGHERDVPTDDPHEGSSRGAQVQYWRLSLGPTGALSYVPSTMPKKPAKKSHDVKIELEDEPEDEQALRAQCASGEASTSGRNDSEIPGFRQRMVSSWDSRLRERTNRVVYEEISDPEEE		IPR003655 [KRAB-related]	IPR001909 [KRAB]	IPR019041 [SSXRD]			1/1:22:61	0.00035	YRAFADISKYFSRNQWKKMSYSDKVTCVYLKRNYTTMTRL	1/1:24:61	8.7e-13	AFADISKYFSRNQWKKMSYSDKVTCVYLKRNYTTMTRL	1/1:24:61	1.5e-21	AFADISKYFSRNQWKKMSYSDKVTCVYLKRNYTTMTRL	1/1:24:61	3.1e-06	AFADISKYFSRNQWKKMSYSDKVTCVYLKRNYTTMTRL	1/1:24:61	5.1e-21	AFADISKYFSRNQWKKMSYSDKVTCVYLKRNYTTMTRL
196	SSX ortho/para		161804_CGRIS	cgri	Cricetulus griseus	Chinese hamster	Mammalia		MNRRRSCSVNVKKTEHNPEKTCKAFEDISKYFSKEEWAKMSYSEKITYVYMKRNYTTMTRLGLRTHLPDFMQSKEKATKSVLSDSDEGCGHESQGNKLSVWSHRLRERKKPVIYEEISDPEEEDEDEEEKGWTCARCKFCEAGDSGCMFPNTQLSCHEGVTQYRTDVMS		IPR003655 [KRAB-related]	IPR001909 [KRAB]	IPR019041 [SSXRD]			1/1:22:61	1.1e-06	CKAFEDISKYFSKEEWAKMSYSEKITYVYMKRNYTTMTRL	1/1:24:61	2e-18	AFEDISKYFSKEEWAKMSYSEKITYVYMKRNYTTMTRL	1/1:24:61	1.4e-24	AFEDISKYFSKEEWAKMSYSEKITYVYMKRNYTTMTRL	1/1:24:61	2e-09	AFEDISKYFSKEEWAKMSYSEKITYVYMKRNYTTMTRL	1/1:24:61	4.3e-26	AFEDISKYFSKEEWAKMSYSEKITYVYMKRNYTTMTRL
197	SSX ortho/para		A0A061HXA4	cgri	Cricetulus griseus	Chinese hamster	Mammalia	-	TGSIQAFLQDRIPSAMNRRRSCSVNVKKTEHNPEKTCKAFEDISKYFSKEEWAKMSYSEKSTHVYMERNYTTMTRLERNESKLSVWSHRLRERKKPVIYEEISDPEEEDEDEEEKGWTCARCKFCEAGDSGCMFPNTQLSCHEGVTQYRTDVMS				PF09514 [SSXRD]			1/1:37:76	3e-06	CKAFEDISKYFSKEEWAKMSYSEKSTHVYMERNYTTMTRL	1/1:39:76	6.8e-16	AFEDISKYFSKEEWAKMSYSEKSTHVYMERNYTTMTRL	1/1:39:76	1.9e-22	AFEDISKYFSKEEWAKMSYSEKSTHVYMERNYTTMTRL	1/1:39:76	1.1e-07	AFEDISKYFSKEEWAKMSYSEKSTHVYMERNYTTMTRL	1/1:39:76	5.2e-23	AFEDISKYFSKEEWAKMSYSEKSTHVYMERNYTTMTRL
198	SSX ortho/para		A0A3L7H1Y4	cgri	Cricetulus griseus	Chinese hamster	Mammalia	SSX9	HWILGLETVRLCFHIKVAPCHQDIEFLFLGEYIHDLEKICRAFGDISTSFSEEEYEKMAKSQKSAYIIMKRIYTTIINLADRKMWFRQAWMTPNLFPCSGLSACCRSLYPCSFTSERNVKDKIDEHPALFNLVQG							1/1:40:79	3.8e-06	CRAFGDISTSFSEEEYEKMAKSQKSAYIIMKRIYTTIINL	1/1:42:79	1.6e-06	AFGDISTSFSEEEYEKMAKSQKSAYIIMKRIYTTIINL	1/1:42:79	1.3e-16	AFGDISTSFSEEEYEKMAKSQKSAYIIMKRIYTTIINL	1/1:42:79	6.5e-07	AFGDISTSFSEEEYEKMAKSQKSAYIIMKRIYTTIINL	1/1:42:79	2.6e-15	AFGDISTSFSEEEYEKMAKSQKSAYIIMKRIYTTIINL
199	SSX ortho/para		A0A3L7H1Z6	cgri	Cricetulus griseus	Chinese hamster	Mammalia	SSX3	HWILGLETVRLCFHIKVAPCHQDIEFLFLREYIHDLEKICRAFGDISTSFSEEEYEKMAKSQKSAYIIMKRIYTTIINLADRKMWFRQAWMTPNLFPCSGLSACCRSLYPSSFTSEGSLHNVKERLASKDDGLVS							1/1:40:79	3.8e-06	CRAFGDISTSFSEEEYEKMAKSQKSAYIIMKRIYTTIINL	1/1:42:79	1.6e-06	AFGDISTSFSEEEYEKMAKSQKSAYIIMKRIYTTIINL	1/1:42:79	1.3e-16	AFGDISTSFSEEEYEKMAKSQKSAYIIMKRIYTTIINL	1/1:42:79	6.5e-07	AFGDISTSFSEEEYEKMAKSQKSAYIIMKRIYTTIINL	1/1:42:79	2.6e-15	AFGDISTSFSEEEYEKMAKSQKSAYIIMKRIYTTIINL
200	SSX ortho/para		A0A3L7H3K6	cgri	Cricetulus griseus	Chinese hamster	Mammalia	-	AFQDISKYFSKEELPKMSYSEKSTHVYMERNYTTMTRLGLRTHLPNFMQSKEKATKSMLSDSDKFVAMRVKFPDANSVMQLTLAACVQTPSPPVMKV							1/1:1:38	0.00014	AFQDISKYFSKEELPKMSYSEKSTHVYMERNYTTMTRL	1/1:1:38	2.2e-13	AFQDISKYFSKEELPKMSYSEKSTHVYMERNYTTMTRL	1/1:1:38	1.5e-20	AFQDISKYFSKEELPKMSYSEKSTHVYMERNYTTMTRL	1/1:1:38	3.9e-05	AFQDISKYFSKEELPKMSYSEKSTHVYMERNYTTMTRL	1/1:1:38	2.1e-20	AFQDISKYFSKEELPKMSYSEKSTHVYMERNYTTMTRL
201	SSX ortho/para		633474_CGRIS	cgri	Cricetulus griseus	Chinese hamster	Mammalia		MGHFVLEENQIVSLKFHDPTNMKTECCRVKRPGEPLNEPKKIVQPFQDICAYFSEEEWAKLTKWQKSAYMYMKRNYVRMTGLGVTVNQPVFMRCKEQVKEPPAECDKANGPDRVKNVRVNAWTHRLRERKKRVIYEEISDPEEDEDDDDDDNDDDDDDDD		IPR003655 [KRAB-related]	IPR001909 [KRAB]	IPR019041 [SSXRD]			1/1:43:82	8.1e-08	VQPFQDICAYFSEEEWAKLTKWQKSAYMYMKRNYVRMTGL	1/1:45:82	3.7e-14	PFQDICAYFSEEEWAKLTKWQKSAYMYMKRNYVRMTGL	1/1:45:82	1.5e-19	PFQDICAYFSEEEWAKLTKWQKSAYMYMKRNYVRMTGL	1/1:45:82	8.5e-10	PFQDICAYFSEEEWAKLTKWQKSAYMYMKRNYVRMTGL	1/1:45:82	2e-20	PFQDICAYFSEEEWAKLTKWQKSAYMYMKRNYVRMTGL
202	SSX ortho/para		A0A2Y9MBD1	dleu	Delphinapterus leucas	Beluga whale	Mammalia	111169512 [Gene Symbol: LOC111169512] [Locus Tag: ] [Chromosome: Un] [Map Location: ] [Description: putative protein SSX9] [Gene Type: protein-coding]	MNRGRSFEKSPREGSQKSEKNSKVRXDISKYFSKKEWADLGYSEKITYVYMKRNYDIMTDLGLKATLPTFMCPKKRATKSNGHDSKDQNPRNQLQKEKTPSKLVPVTSGSEQAQEQLCPPGKANTSGQQSKKTSGHRRREINVWTHRLRERKNLVVYEEISDSEEDD				PF09514 [SSXRD]			1/1:22:61	6.2e-05	SKVRXDISKYFSKKEWADLGYSEKITYVYMKRNYDIMTDL	1/1:24:61	2.1e-15	VRXDISKYFSKKEWADLGYSEKITYVYMKRNYDIMTDL	1/1:24:61	7.9e-22	VRXDISKYFSKKEWADLGYSEKITYVYMKRNYDIMTDL	1/1:24:61	6.6e-09	VRXDISKYFSKKEWADLGYSEKITYVYMKRNYDIMTDL	1/1:24:61	3.1e-23	VRXDISKYFSKKEWADLGYSEKITYVYMKRNYDIMTDL
203	SSX ortho/para		A0A1S3GV82	dord	Dipodomys ordii	Ords kangaroo rat	Mammalia	-	MNSDGSFSKIPREDSQNSPEKYQAFEDISKYFSKDEWEKLSYSQKISYVYMKRNYTTMSSLGFSATLPPFMEPKEMAEESLGTDSDEGCSHDNMEKHSGKQLTKRPKMDKQSAKKSSIQKGRSRAVDSTLVAVKNMCTPEKESASGKCSEKTSGSWRKKKNIWTHRLRERKNLVVYEEISDPEEEDDEDGKEECNGEESDEEEKEKCNGKEKEESDDEGKYNGGEAEKTSEDHSGEEYNEEEDYNEEDEYNGEESDEDYFIGEYEDNDNFNGLNVTSSSQGKMEEEMLFMYNQQDLLSLCVRLAVLLAVTLIVPIVLFPGVLHNTSECGIQFPESCRKGKG			PF01352 [KRAB]	PF09514 [SSXRD]			1/1:22:61	6.1e-08	YQAFEDISKYFSKDEWEKLSYSQKISYVYMKRNYTTMSSL	1/1:24:61	1.3e-15	AFEDISKYFSKDEWEKLSYSQKISYVYMKRNYTTMSSL	1/1:24:61	5.2e-23	AFEDISKYFSKDEWEKLSYSQKISYVYMKRNYTTMSSL	1/1:24:61	3.6e-10	AFEDISKYFSKDEWEKLSYSQKISYVYMKRNYTTMSSL	1/1:24:61	4.5e-25	AFEDISKYFSKDEWEKLSYSQKISYVYMKRNYTTMSSL
204	SSX ortho/para		ENSETEP00000000229	etel	Echinops telfairi	Lesser hedgehog tenrec	Mammalia		MNGGRPKEKEGKAFNDISKYFTKEEWAGMTSSKKTTYVYMKRNYDTMTKLGLKAVCPSFMKQVRKDNSNNDNYVDTEDEHSKMDFNVQPSKKLKEVSKDENEASQTAVDKQLRYPTRASRQQNKPVLKEKETNIQTYALRERKGHVVYEEPSDTEEDEDDDD		IPR003655 [KRAB-related]	IPR001909 [KRAB]	IPR019041 [SSXRD]			1/1:11:50	1.7e-06	GKAFNDISKYFTKEEWAGMTSSKKTTYVYMKRNYDTMTKL	1/1:13:50	6.7e-17	AFNDISKYFTKEEWAGMTSSKKTTYVYMKRNYDTMTKL	1/1:13:50	8.7e-22	AFNDISKYFTKEEWAGMTSSKKTTYVYMKRNYDTMTKL	1/1:13:50	2.3e-10	AFNDISKYFTKEEWAGMTSSKKTTYVYMKRNYDTMTKL	1/1:13:50	1.1e-23	AFNDISKYFTKEEWAGMTSSKKTTYVYMKRNYDTMTKL
205	SSX ortho/para		A0A2Y9JST5	elut	Enhydra lutris kenyoni	Sea otter	Mammalia	111150567 [Gene Symbol: LOC111150567] [Locus Tag: ] [Chromosome: Un] [Map Location: ] [Description: putative protein SSX6] [Gene Type: protein-coding]	MNKGSSFAKNSKEDTQKSEKKCKAFKDISKYFSKEEWAKLGYSDKITYVYMKRNYDTMTSLGLRASLPAFMCPKKRAMKSSGRDSDDDQNENQDESSQESSDAQEREKMKVMLEKTIKEESDLEPIPITPGPEQAQKEPCPPEEASTSGQQSENIPGPRKVMNSVWAYRLRERKTLIVYEEISDPEEDD			PF01352 [KRAB]	PF09514 [SSXRD]			1/1:22:61	2.2e-07	CKAFKDISKYFSKEEWAKLGYSDKITYVYMKRNYDTMTSL	1/1:24:61	8.2e-19	AFKDISKYFSKEEWAKLGYSDKITYVYMKRNYDTMTSL	1/1:24:61	2.3e-24	AFKDISKYFSKEEWAKLGYSDKITYVYMKRNYDTMTSL	1/1:24:61	6.6e-11	AFKDISKYFSKEEWAKLGYSDKITYVYMKRNYDTMTSL	1/1:24:61	3.3e-27	AFKDISKYFSKEEWAKLGYSDKITYVYMKRNYDTMTSL
206	SSX ortho/para		ENSECAP00000003532	ecab	Equus caballus	Horse	Mammalia	Uncharacterized protein	MNRDSSFAKSLKKGTRKLEKECKAFEDISKYICKEEWAKLGYSEKITYVYMKRNYDTMTSLGLRAKLPAFMCPKKGNTKSRGRNSGKGRNPRNQDEPPQKASSVQQRKRQKVMRKKPAKEKNDSKPVPVTPGSKQAHKQLFPLGEASTSGQQSEKTPGPGEGKTNVWAHRLRERPVAYEEISHPEED		IPR003655 [KRAB-related]	IPR001909 [KRAB]	IPR019041 [SSXRD]			1/1:22:61	3.3e-06	CKAFEDISKYICKEEWAKLGYSEKITYVYMKRNYDTMTSL	1/1:24:61	1e-14	AFEDISKYICKEEWAKLGYSEKITYVYMKRNYDTMTSL	1/1:24:61	4.6e-23	AFEDISKYICKEEWAKLGYSEKITYVYMKRNYDTMTSL	1/1:24:61	2.4e-10	AFEDISKYICKEEWAKLGYSEKITYVYMKRNYDTMTSL	1/1:24:61	9.8e-26	AFEDISKYICKEEWAKLGYSEKITYVYMKRNYDTMTSL
207	SSX ortho/para		A0A1S3WJC4	eeur	Erinaceus europaeus	Western European hedgehog	Mammalia	103119172 [Gene Symbol: LOC103119172] [Locus Tag: ] [Chromosome: Un] [Map Location: ] [Description: protein SSX2-like] [Gene Type: protein-coding]	MPRTMNSTFKTGTQENNQKSNMHKCKCQAFMAISKYFSKKEWAKLGYTEKTTYVYMKRNYETMSALGLRATLPTFMCSGKPTTEFNGNNSVHDENLECERLQKEKKTIWSCRLRERKTMVTYEEISDPEEED				PF09514 [SSXRD]			1/1:27:66	7e-06	CQAFMAISKYFSKKEWAKLGYTEKTTYVYMKRNYETMSAL	1/1:29:66	2e-16	AFMAISKYFSKKEWAKLGYTEKTTYVYMKRNYETMSAL	1/1:29:66	1.1e-21	AFMAISKYFSKKEWAKLGYTEKTTYVYMKRNYETMSAL	1/1:29:66	7.6e-09	AFMAISKYFSKKEWAKLGYTEKTTYVYMKRNYETMSAL	1/1:29:66	2.4e-23	AFMAISKYFSKKEWAKLGYTEKTTYVYMKRNYETMSAL
208	SSX ortho/para		ENSFCAP00000025263	fcat	Felis catus	Cat	Mammalia	Uncharacterized protein	MNKGNSFAKRPKEVTQKSEKKCKEFEAISKFFSKEEWAKLGYSDKITYVYMKRNYDIMTGLGFKTTLPAFMCPKKCATKSSGHDSDEDQDSGNEIVSEHRDMNIGKSEGIIKKVMHKKPKEKDDSDPVPVALGSKQVQEQQRCPGKASAPGKKSKKKPGSKKRKNIWANRLRQRKNLIAYEEISDPEEDD		IPR003655 [KRAB-related]	IPR001909 [KRAB]	IPR019041 [SSXRD]			1/1:22:61	3.3e-05	CKEFEAISKFFSKEEWAKLGYSDKITYVYMKRNYDIMTGL	1/1:24:61	1.4e-14	EFEAISKFFSKEEWAKLGYSDKITYVYMKRNYDIMTGL	1/1:24:61	7e-22	EFEAISKFFSKEEWAKLGYSDKITYVYMKRNYDIMTGL	1/1:24:61	5.1e-09	EFEAISKFFSKEEWAKLGYSDKITYVYMKRNYDIMTGL	1/1:24:61	1.2e-23	EFEAISKFFSKEEWAKLGYSDKITYVYMKRNYDIMTGL
209	SSX ortho/para		A0A091CVR3	fdam	Fukomys damarensis	Damaraland mole rat	Mammalia	-	MNGDSSFAKGPGKNTLKSEKINKVFEEISNYFSESQWEKLSYSDKITWVYLKRNYITMSSLGLRAFLPTFRNNQKKDNSTPKDNSGETSSHGTKGQSISFSDKADLTFPVSPTLTYQPFSIIDFKRGDNVWSHRLHERKNFVVYEEISEPEEEEDN				PF09514 [SSXRD]			1/1:22:61	0.00031	NKVFEEISNYFSESQWEKLSYSDKITWVYLKRNYITMSSL	1/1:24:61	2.1e-08	VFEEISNYFSESQWEKLSYSDKITWVYLKRNYITMSSL	1/1:24:61	4.4e-19	VFEEISNYFSESQWEKLSYSDKITWVYLKRNYITMSSL	1/1:24:61	1.5e-06	VFEEISNYFSESQWEKLSYSDKITWVYLKRNYITMSSL	1/1:24:61	3e-18	VFEEISNYFSESQWEKLSYSDKITWVYLKRNYITMSSL
210	SSX ortho/para		G5BJG8	hgla	Heterocephalus glaber	Naked Mole-rat	Mammalia	-	MNRGSSFSKSPREDTLKSEKIYKIFGEISKYFSESQWGKLSYLDKITCVCLKRNYNTMSNLGNGLATLPTFMRNHKGAKPTCKGNSDEASSHGTQGSKVLKKKSLILLICGLDIKKKSKKPAKKRNDPKTVAGAPDKEQAGRTKGPRGEASTSGKKHTKISGERKRKVSVWSKQLREWKNLMVYEEISDPEEED				PF09514 [SSXRD]			1/1:22:61	0.0032	YKIFGEISKYFSESQWGKLSYLDKITCVCLKRNYNTMSNL	1/1:24:61	3.3e-10	IFGEISKYFSESQWGKLSYLDKITCVCLKRNYNTMSNL	1/1:24:61	4.9e-18	IFGEISKYFSESQWGKLSYLDKITCVCLKRNYNTMSNL	1/1:24:61	4.2e-05	IFGEISKYFSESQWGKLSYLDKITCVCLKRNYNTMSNL	1/1:24:61	4.6e-17	IFGEISKYFSESQWGKLSYLDKITCVCLKRNYNTMSNL
211	SSX ortho/para		ENSSTOP00000013773	itri	Ictidomys tridecemlineatus	Thirteen-lined ground squirrel	Mammalia	Uncharacterized protein	MNKDSSFSKSLREDTQKSEKKYKAFRDISKYFSKKEWAKLSHSEKITYVYLKRNYTTMTSLGLRATLPAFMSSNRQIIESQSDDSDECRNRGSQVSWKSFTEAILKQILPSGMPKKPAMEENDPKGVPKAVGSEQAQRQLYPLGKASTSGKQSEKVSGPRKKNVNIWSHRLRERKYLVAYEEISDPEEED		IPR003655 [KRAB-related]	IPR001909 [KRAB]	IPR019041 [SSXRD]			1/1:22:61	1.7e-06	YKAFRDISKYFSKKEWAKLSHSEKITYVYLKRNYTTMTSL	1/1:24:61	1.2e-18	AFRDISKYFSKKEWAKLSHSEKITYVYLKRNYTTMTSL	1/1:24:61	1.9e-23	AFRDISKYFSKKEWAKLSHSEKITYVYLKRNYTTMTSL	1/1:24:61	1.4e-10	AFRDISKYFSKKEWAKLSHSEKITYVYLKRNYTTMTSL	1/1:24:61	8.3e-26	AFRDISKYFSKKEWAKLSHSEKITYVYLKRNYTTMTSL
212	SSX ortho/para		A0A2U3Y4D8	lwed	Leptonychotes weddellii	Weddell seal	Mammalia	102743725 [Gene Symbol: LOC102743725] [Locus Tag: ] [Chromosome: Un] [Map Location: ] [Description: protein SSXA1-like] [Gene Type: protein-coding]	MNKDSSFSKNSKEDTQKPEKKCKAFKDISKYFSKEEWAKLGYSDKITYVYMKRNYDTMTGLGLRATLPAFMCPKKRAMKSSGHDSDEGQDRKNQDTADNYRSLWSLGLFANKEKFLFITFFQVMLKKPIKEESDSEPIPITPGPEQAQKELCPPGKASTSEGLNGCSGPRRGMNSIWAYRLRERKNLIVYEEISDPEEDD							1/1:22:61	1.4e-06	CKAFKDISKYFSKEEWAKLGYSDKITYVYMKRNYDTMTGL	1/1:24:61	3.6e-18	AFKDISKYFSKEEWAKLGYSDKITYVYMKRNYDTMTGL	1/1:24:61	1.6e-24	AFKDISKYFSKEEWAKLGYSDKITYVYMKRNYDTMTGL	1/1:24:61	4e-10	AFKDISKYFSKEEWAKLGYSDKITYVYMKRNYDTMTGL	1/1:24:61	9.4e-27	AFKDISKYFSKEEWAKLGYSDKITYVYMKRNYDTMTGL
213	SSX ortho/para		A0A340WN90	lvex	Lipotes vexillifer	Chinese river dolphin	Mammalia	-	MCSSRSDQSQHHEQSRSFEKSPRKDSQKSEKNSKAFKDISKYFSKKEWADLGYSEKTTYVYVKRNYDIMTDLGLKATLPTFMCPKKRATKSNEHDSKDQNPRNQYVPAQEASNMRERKHLKMPSLTTGSTSSRLLSRRAPFTLLGNRLDCWPLPSVSSFGALSAPEASLKPQSQPRGTLRGFLDKFFHNCRLNSNLEGKGIWRVMPKKSKKKKNPSKLVPVTSGSEQAQKQLCPPGKANTSGQQKTSGPRKREINVWTHRLRERKKLVVYEEISDPEEDD				PF09514 [SSXRD]			1/1:33:72	2.3e-06	SKAFKDISKYFSKKEWADLGYSEKTTYVYVKRNYDIMTDL	1/1:35:72	1.3e-18	AFKDISKYFSKKEWADLGYSEKTTYVYVKRNYDIMTDL	1/1:35:72	1.5e-22	AFKDISKYFSKKEWADLGYSEKTTYVYVKRNYDIMTDL	1/1:35:72	7.8e-11	AFKDISKYFSKKEWADLGYSEKTTYVYVKRNYDIMTDL	1/1:35:72	1.2e-25	AFKDISKYFSKKEWADLGYSEKTTYVYVKRNYDIMTDL
214	SSX ortho/para		ENSLAFP00000003781	lafr	Loxodonta africana	African elephant	Mammalia	Uncharacterized protein	SVHLKWKESKPVAECQAFKDILKYFSKEEWAKLGYSKKVTYVYMKRNYDTMTNLGLRATLPPFMDPNRLATKSQLDESDEEQNPGTQGNPRFINHQKLRERKNLVAYEEISDPEEED		IPR003655 [KRAB-related]	IPR001909 [KRAB]	IPR019041 [SSXRD]			1/1:15:54	1.1e-06	CQAFKDILKYFSKEEWAKLGYSKKVTYVYMKRNYDTMTNL	1/1:17:54	1.1e-16	AFKDILKYFSKEEWAKLGYSKKVTYVYMKRNYDTMTNL	1/1:17:54	7.2e-23	AFKDILKYFSKEEWAKLGYSKKVTYVYMKRNYDTMTNL	1/1:17:54	1.4e-09	AFKDILKYFSKEEWAKLGYSKKVTYVYMKRNYDTMTNL	1/1:17:54	2.5e-24	AFKDILKYFSKEEWAKLGYSKKVTYVYMKRNYDTMTNL
215	SSX ortho/para		A0A485NT37	lpar	Lynx pardinus	Iberian lynx	Mammalia	KRAB-related domain-containing protein	MNKGNSFAKRPKEVTQKSEKKCKEFEAISKFFSKEVWAKLGYSDKITYVYMKRNYDIMTGLGLKTTLPAFMCPKKCATKSSGHDSDEDQDSGNENEPLQEDSDVQQRKRLKVMHKKPKEKDDSDPVPVALGSKQVQEQQRCPRKASAPGKKSKKKPGSKKGKNIWANRLRQRKNLIAYEEISDPEEDD				PF09514 [SSXRD]			1/1:22:61	0.00032	CKEFEAISKFFSKEVWAKLGYSDKITYVYMKRNYDIMTGL	1/1:24:61	3.7e-13	EFEAISKFFSKEVWAKLGYSDKITYVYMKRNYDIMTGL	1/1:24:61	1.5e-20	EFEAISKFFSKEVWAKLGYSDKITYVYMKRNYDIMTGL	1/1:24:61	1.5e-08	EFEAISKFFSKEVWAKLGYSDKITYVYMKRNYDIMTGL	1/1:24:61	6.1e-23	EFEAISKFFSKEVWAKLGYSDKITYVYMKRNYDIMTGL
216	SSX ortho/para		A0A3Q0C8U0	maur	Mesocricetus auratus	Golden hamster	Mammalia	101831010 [Gene Symbol: LOC101831010] [Locus Tag: ] [Chromosome: Un] [Map Location: ] [Description: protein SSX5-like] [Gene Type: protein-coding]	MNNRNSCSVNLRKTEHSPEKTCKAFQDISKYFSKEEWAKLSYSEKITYVYMKRNYTTMTSLGLKAHLPDFMEPKEEATKSVLSDSDEGCGHESQEHNERKLSIWSHRLRERKKPVIYEEISDPEEEDEDEKEEGWTYRRNKPMI			PF01352 [KRAB]	PF09514 [SSXRD]			1/1:22:61	1.1e-07	CKAFQDISKYFSKEEWAKLSYSEKITYVYMKRNYTTMTSL	1/1:24:61	1e-18	AFQDISKYFSKEEWAKLSYSEKITYVYMKRNYTTMTSL	1/1:24:61	1.7e-24	AFQDISKYFSKEEWAKLSYSEKITYVYMKRNYTTMTSL	1/1:24:61	1.6e-10	AFQDISKYFSKEEWAKLSYSEKITYVYMKRNYTTMTSL	1/1:24:61	7.3e-27	AFQDISKYFSKEEWAKLSYSEKITYVYMKRNYTTMTSL
217	SSX ortho/para		A0A4U1ET03	mmon	Monodon monoceros	narwhal	Mammalia	KRAB-related domain-containing protein	MNRGRSFEKSPREGSQKSEKNSKDISKYFSKKEWADLGYSEKITYVYMKRNYDIMTDLGLKATLPTFMCPKKRATKSNGHDSKDQNPRNQLTSGSEQAQEQLCPPGKANTSGQQSKKTSGKRKLFGNNSSGFPGHVQVHGLGHRRREINVWTHRLRERKNLVVYEEISDSEEDD				PF09514 [SSXRD]			1/1:19:58	7e-05	EKNSKDISKYFSKKEWADLGYSEKITYVYMKRNYDIMTDL	1/1:21:58	5.9e-17	NSKDISKYFSKKEWADLGYSEKITYVYMKRNYDIMTDL	1/1:21:58	2.7e-22	NSKDISKYFSKKEWADLGYSEKITYVYMKRNYDIMTDL	1/1:21:58	1.8e-09	NSKDISKYFSKKEWADLGYSEKITYVYMKRNYDIMTDL	1/1:21:58	2.9e-24	NSKDISKYFSKKEWADLGYSEKITYVYMKRNYDIMTDL
218	SSX ortho/para		ENSMUSP00000122221	mmus	Mus musculus	house mouse	Mammalia	Protein Ssxa1	MKRRSHSVNLGKTKHKPEETCQAFEDISKYFSKEEWKKLSRSEKITYVYMKRNYTTMTNLGLRAHLPDFMESKERVTKSVLSDSDEVSSHESQGLRRPVSHQLREKKKPVIYEEISDLEEEDEDEEE		IPR003655 [KRAB-related]	IPR001909 [KRAB]	IPR019041 [SSXRD]			1/1:21:60	2.5e-07	CQAFEDISKYFSKEEWKKLSRSEKITYVYMKRNYTTMTNL	1/1:23:60	7.1e-18	AFEDISKYFSKEEWKKLSRSEKITYVYMKRNYTTMTNL	1/1:23:60	9.3e-24	AFEDISKYFSKEEWKKLSRSEKITYVYMKRNYTTMTNL	1/1:23:60	2.8e-10	AFEDISKYFSKEEWKKLSRSEKITYVYMKRNYTTMTNL	1/1:23:60	5.1e-25	AFEDISKYFSKEEWKKLSRSEKITYVYMKRNYTTMTNL
219	SSX ortho/para		ENSMUSP00000100068	mmus	Mus musculus	house mouse	Mammalia	MCG68110, isoform CRA_a; Protein Ssxb10; SSXB10 protein	METVSSCEKIPMEVLYEPKNICKAFQDISTYFSDEEWGKLTEWQKSAYVYMKRNYIRMTDLGVTVNQPVFMRGKEQDKQSLVEGIEDHDSEDECFEGSFGVTPRKRMKLTSVTISIHNVEGSLASGENDSNLAEPGGIQVNVWSHRLRERKYRVIYSEISDPEEEEDDDY		IPR003655 [KRAB-related]	IPR001909 [KRAB]	IPR019041 [SSXRD]			1/1:22:61	3.7e-08	CKAFQDISTYFSDEEWGKLTEWQKSAYVYMKRNYIRMTDL	1/1:24:61	1.3e-15	AFQDISTYFSDEEWGKLTEWQKSAYVYMKRNYIRMTDL	1/1:24:61	7.2e-21	AFQDISTYFSDEEWGKLTEWQKSAYVYMKRNYIRMTDL	1/1:24:61	1.5e-09	AFQDISTYFSDEEWGKLTEWQKSAYVYMKRNYIRMTDL	1/1:24:61	1.1e-21	AFQDISTYFSDEEWGKLTEWQKSAYVYMKRNYIRMTDL
220	SSX ortho/para		ENSMUSP00000111236	mmus	Mus musculus	house mouse	Mammalia	Protein Gm14459	MVSFQNNTNMETVSSCEKIPMEVLCEPKNICKAFQDISTYFSDEEWGKLTEWQKSAYVYMKRNYIRMTDLGVTVNQPVFMRGKDQDKQCLVEGIEVHDSNDECFEGSFGVTPRKRMKLTSVTISIHNVEERLASGEYDSNLAETGGIQVNVWSHRLRERKYRVIYSEISDPEEEEDDYY		IPR003655 [KRAB-related]	IPR001909 [KRAB]	IPR019041 [SSXRD]			1/1:31:70	3.7e-08	CKAFQDISTYFSDEEWGKLTEWQKSAYVYMKRNYIRMTDL	1/1:33:70	1.3e-15	AFQDISTYFSDEEWGKLTEWQKSAYVYMKRNYIRMTDL	1/1:33:70	7.2e-21	AFQDISTYFSDEEWGKLTEWQKSAYVYMKRNYIRMTDL	1/1:33:70	1.5e-09	AFQDISTYFSDEEWGKLTEWQKSAYVYMKRNYIRMTDL	1/1:33:70	1.1e-21	AFQDISTYFSDEEWGKLTEWQKSAYVYMKRNYIRMTDL
221	SSX ortho/para		ENSMUSP00000086792	mmus	Mus musculus	house mouse	Mammalia	Protein Ssxb3; SSXB3 protein; Synovial sarcoma, X member B, breakpoint 3	METVSSCEKIPMEVLYEPKNICKAFQDISTYFSDEEWGKLTQWQKSAYMYMKRNYIRMTDLGVTVNQPVFMRGKEQEKQSLVEGIEVHDSDDECFEGSFDVTPRKRMKLTSVTISIHNVEGSLASGKNDSNLAETDGIQVNVWSHRLRERKYRVIYSEISDPEEEEDDDY		IPR003655 [KRAB-related]	IPR001909 [KRAB]	IPR019041 [SSXRD]			1/1:22:61	2.5e-08	CKAFQDISTYFSDEEWGKLTQWQKSAYMYMKRNYIRMTDL	1/1:24:61	4.2e-15	AFQDISTYFSDEEWGKLTQWQKSAYMYMKRNYIRMTDL	1/1:24:61	3.8e-20	AFQDISTYFSDEEWGKLTQWQKSAYMYMKRNYIRMTDL	1/1:24:61	1.1e-09	AFQDISTYFSDEEWGKLTQWQKSAYMYMKRNYIRMTDL	1/1:24:61	1.1e-20	AFQDISTYFSDEEWGKLTQWQKSAYMYMKRNYIRMTDL
222	SSX ortho/para		A2AHC8	mmus	Mus musculus	house mouse	Mammalia	KRAB-related domain-containing protein	AFQDISTYFSDEEWGKLTQWQKSAYVYMKRNYIRMTDLGVTVNQPVFMRGKEQDKQSLVEGIEDHDSEDECFEGSFGVTLRKRMKLTSVTISIHNVEGSLASGENDSDVAETGGIQVNVWSHRLRERKYRVIYEEISDPEEEEDDDY			PF01352 [KRAB]	PF09514 [SSXRD]			1/1:1:38	3.4e-07	AFQDISTYFSDEEWGKLTQWQKSAYVYMKRNYIRMTDL	1/1:1:38	3.9e-15	AFQDISTYFSDEEWGKLTQWQKSAYVYMKRNYIRMTDL	1/1:1:38	5.8e-21	AFQDISTYFSDEEWGKLTQWQKSAYVYMKRNYIRMTDL	1/1:1:38	1.5e-09	AFQDISTYFSDEEWGKLTQWQKSAYVYMKRNYIRMTDL	1/1:1:38	1.6e-21	AFQDISTYFSDEEWGKLTQWQKSAYVYMKRNYIRMTDL
223	SSX ortho/para		ENSMUSP00000023931	mmus	Mus musculus	house mouse	Mammalia	Ssxb2-201; synovial sarcoma, X member B2 [Source:MGI Symbol;Acc:MGI:2446771	MMQCTVLQNGDLNSLKRRTFGFVLEEDKIVSFQNHPDMETVSSCEKNPMEVLYEPKNICKAFQDISTYFSDEEWGKLTQWQKSAYVYMKRNYIRMTDLGVTVNQPVFMRGKEQDKQSLVEGIEVHDSDETSGIRVNVWSHRLRERKYRVIYEEISDPEEEEDDDY			PF01352 [KRAB]	PF09514 [SSXRD]			1/1:59:98	4.5e-08	CKAFQDISTYFSDEEWGKLTQWQKSAYVYMKRNYIRMTDL	1/1:61:98	3.9e-15	AFQDISTYFSDEEWGKLTQWQKSAYVYMKRNYIRMTDL	1/1:61:98	5.8e-21	AFQDISTYFSDEEWGKLTQWQKSAYVYMKRNYIRMTDL	1/1:61:98	1.5e-09	AFQDISTYFSDEEWGKLTQWQKSAYVYMKRNYIRMTDL	1/1:61:98	1.6e-21	AFQDISTYFSDEEWGKLTQWQKSAYVYMKRNYIRMTDL
224	SSX ortho/para		ENSMUSP00000037624	mmus	Mus musculus	house mouse	Mammalia	MCG116417; Protein Ssxb1; SSXB1 protein; Ssxb1 protein; Synovial sarcoma, X member B, breakpoint 1	METVSSCEKVPMEVLYEPKNICKAFQDISTYFSDEEWGKLTQWQKSAYVYMKRNYIRMTDLGVTVNQPVFMRGKEQAKQSLVEGIEVHDSEDECFEGSFGVTPIKRMKLTSVTISFHNVEGSLASGENDCNLAETGGIQVNVWSHRLRERKYRVIYSEISDTEEEEDDDY		IPR003655 [KRAB-related]	IPR001909 [KRAB]	IPR019041 [SSXRD]			1/1:22:61	4.5e-08	CKAFQDISTYFSDEEWGKLTQWQKSAYVYMKRNYIRMTDL	1/1:24:61	3.9e-15	AFQDISTYFSDEEWGKLTQWQKSAYVYMKRNYIRMTDL	1/1:24:61	5.8e-21	AFQDISTYFSDEEWGKLTQWQKSAYVYMKRNYIRMTDL	1/1:24:61	1.5e-09	AFQDISTYFSDEEWGKLTQWQKSAYVYMKRNYIRMTDL	1/1:24:61	1.6e-21	AFQDISTYFSDEEWGKLTQWQKSAYVYMKRNYIRMTDL
225	SSX ortho/para		ENSMUSP00000086787	mmus	Mus musculus	house mouse	Mammalia	MCG68109; Protein Ssxb5; SSXB5 protein	MEVLYEPKNNCKAFQDISTYFSDEEWGKLTQWQKSAYVYMKRNYIRMTDLGVNVNQPVFMRGKEQAKQFLVEGIEDHDSEDECFEESFGVTPRKRMKLTSVTISIHNVEGSLASGENDSNLAETDGIQVNVWSHRLRERKYRVIYSEISDPEEEEDDDY		IPR003655 [KRAB-related]	IPR001909 [KRAB]	IPR019041 [SSXRD]			1/1:11:50	4.5e-08	CKAFQDISTYFSDEEWGKLTQWQKSAYVYMKRNYIRMTDL	1/1:13:50	3.9e-15	AFQDISTYFSDEEWGKLTQWQKSAYVYMKRNYIRMTDL	1/1:13:50	5.8e-21	AFQDISTYFSDEEWGKLTQWQKSAYVYMKRNYIRMTDL	1/1:13:50	1.5e-09	AFQDISTYFSDEEWGKLTQWQKSAYVYMKRNYIRMTDL	1/1:13:50	1.6e-21	AFQDISTYFSDEEWGKLTQWQKSAYVYMKRNYIRMTDL
226	SSX ortho/para		ENSMUSP00000099213	mmus	Mus musculus	house mouse	Mammalia	MCG1044712; Protein Ssxb8	METVSFCEKVPMEVLYEPKNICKAFQDISTYFSDEEWGKLTQWQKSAYVYMKRNYIRMTDLGVTVNQPVFMSGKEQDKQSLVEGIEVHDSEDECFEGSFGVTPIKQMKLTPVTISIHNVEGSLASGENNSNLAETSGIQVNVWSHRLRERKYRVIYEEISDPEEEEDDDY		IPR003655 [KRAB-related]	IPR001909 [KRAB]	IPR019041 [SSXRD]			1/1:22:61	4.5e-08	CKAFQDISTYFSDEEWGKLTQWQKSAYVYMKRNYIRMTDL	1/1:24:61	3.9e-15	AFQDISTYFSDEEWGKLTQWQKSAYVYMKRNYIRMTDL	1/1:24:61	5.8e-21	AFQDISTYFSDEEWGKLTQWQKSAYVYMKRNYIRMTDL	1/1:24:61	1.5e-09	AFQDISTYFSDEEWGKLTQWQKSAYVYMKRNYIRMTDL	1/1:24:61	1.6e-21	AFQDISTYFSDEEWGKLTQWQKSAYVYMKRNYIRMTDL
227	SSX ortho/para		ENSMUSP00000111247	mmus	Mus musculus	house mouse	Mammalia	Protein Ssxb9	MLEEDKIVSFQNHTDMETVSSCEKVPMEVLYEPKNICKAFQDISTYFSDEEWGKLTQWQKSAYVYMKRNYIRMTDLGVTVNQPVFMRGKEQDKQSLVEGIEDHDSDDECFEGSFGVTPRKRMKLTSVTISIHNVEGSLASVKNDSNLAETSGIRVNVWSHRLRERKYRVIYEEISDPEEEEDDDY		IPR003655 [KRAB-related]	IPR001909 [KRAB]	IPR019041 [SSXRD]			1/1:37:76	4.5e-08	CKAFQDISTYFSDEEWGKLTQWQKSAYVYMKRNYIRMTDL	1/1:39:76	3.9e-15	AFQDISTYFSDEEWGKLTQWQKSAYVYMKRNYIRMTDL	1/1:39:76	5.8e-21	AFQDISTYFSDEEWGKLTQWQKSAYVYMKRNYIRMTDL	1/1:39:76	1.5e-09	AFQDISTYFSDEEWGKLTQWQKSAYVYMKRNYIRMTDL	1/1:39:76	1.6e-21	AFQDISTYFSDEEWGKLTQWQKSAYVYMKRNYIRMTDL
228	SSX ortho/para		Q6XAR6	mmus	Mus musculus	house mouse	Mammalia	Ssxb11	METVSSCEKNPMEVLYEPKNICKAFQDISTYFSDEEWGKLTQWQKSAYVYMKRNYIRMTDLGVTVNQPVFMRGKEQAKQSLVEGIEVHDSEDECFEGSFGVTPIKRMKLTSVTISFHNVEGSLASGENDCNLAETGGIQVNVWSHRLRERKYRVIYSEISDTEEEEDDDY			PF01352 [KRAB]	PF09514 [SSXRD]			1/1:22:61	4.5e-08	CKAFQDISTYFSDEEWGKLTQWQKSAYVYMKRNYIRMTDL	1/1:24:61	3.9e-15	AFQDISTYFSDEEWGKLTQWQKSAYVYMKRNYIRMTDL	1/1:24:61	5.8e-21	AFQDISTYFSDEEWGKLTQWQKSAYVYMKRNYIRMTDL	1/1:24:61	1.5e-09	AFQDISTYFSDEEWGKLTQWQKSAYVYMKRNYIRMTDL	1/1:24:61	1.6e-21	AFQDISTYFSDEEWGKLTQWQKSAYVYMKRNYIRMTDL
229	SSX ortho/para		Q6XAS0	mmus	Mus musculus	house mouse	Mammalia	387284 [Gene Symbol: Ssxb7] [Locus Tag: ] [Chromosome: X] [Map Location: X|X A1.1] [Description: synovial sarcoma, X member B7] [Gene Type: protein-coding]	SDMETVSSCEKIPMEVLYEPKNICKAFQDISTYFSDEEWGKLTQWQKSAYVYMKRNYIRMTDLGVTVNQPVFMRGKEQAKQSLVEGIEVHDSDDECFEGSFDVTPRKRMKLTSVTISIHNVEGSLASGKNDSNLAETGGI			PF01352 [KRAB]				1/1:24:63	4.5e-08	CKAFQDISTYFSDEEWGKLTQWQKSAYVYMKRNYIRMTDL	1/1:26:63	3.9e-15	AFQDISTYFSDEEWGKLTQWQKSAYVYMKRNYIRMTDL	1/1:26:63	5.8e-21	AFQDISTYFSDEEWGKLTQWQKSAYVYMKRNYIRMTDL	1/1:26:63	1.5e-09	AFQDISTYFSDEEWGKLTQWQKSAYVYMKRNYIRMTDL	1/1:26:63	1.6e-21	AFQDISTYFSDEEWGKLTQWQKSAYVYMKRNYIRMTDL
230	SSX ortho/para		A2BI74	mmus	Mus musculus	house mouse	Mammalia	668976 [Gene Symbol: Ssxb6] [Locus Tag: ] [Chromosome: X] [Map Location: X|X A1.1] [Description: synovial sarcoma, X member B6] [Gene Type: protein-coding]	METVSSCEKIPMEVLYEPKNICKAFQDISTYFSDEEWVKLTQWQKSAYVYMKRNYIRMTDLGVTVNQPVFMRGKEQAKQSLVEGIEIHDSDDECFEGSFGVTPIKRMKLTSVTISIHNVEGSHDSGENDSNLAETGGIQVNVWSHRLRERKYRVIYSEISDPEEEEDDDY			PF01352 [KRAB]	PF09514 [SSXRD]			1/1:22:61	1.8e-07	CKAFQDISTYFSDEEWVKLTQWQKSAYVYMKRNYIRMTDL	1/1:24:61	3.4e-15	AFQDISTYFSDEEWVKLTQWQKSAYVYMKRNYIRMTDL	1/1:24:61	1.4e-20	AFQDISTYFSDEEWVKLTQWQKSAYVYMKRNYIRMTDL	1/1:24:61	1.4e-09	AFQDISTYFSDEEWVKLTQWQKSAYVYMKRNYIRMTDL	1/1:24:61	2.1e-21	AFQDISTYFSDEEWVKLTQWQKSAYVYMKRNYIRMTDL
231	SSX ortho/para		ENSMUSP00000111225	mmus	Mus musculus	house mouse	Mammalia	Protein Gm6592	METVISCEKIPMEVLHKPKNICKAFQDISTYFSGEEWGKLTEWQKSAYMYMKRNYTRMTGVTVNQPVFMSGKEQAKQSLVKGIEVHDSEDECFEESFGVTPRKRMKLTSVTISIHNVEGSLASGENDSNLAETDGIQVNVWSHRLRERKYRVIYSEISDPEEEEDDDY		IPR003655 [KRAB-related]	IPR001909 [KRAB]	IPR019041 [SSXRD]			1/1:22:61	2e-08	CKAFQDISTYFSGEEWGKLTEWQKSAYMYMKRNYTRMTGV	1/1:24:61	1.8e-15	AFQDISTYFSGEEWGKLTEWQKSAYMYMKRNYTRMTGV	1/1:24:61	1.7e-19	AFQDISTYFSGEEWGKLTEWQKSAYMYMKRNYTRMTGV	1/1:24:61	4.9e-10	AFQDISTYFSGEEWGKLTEWQKSAYMYMKRNYTRMTGV	1/1:24:61	1.1e-20	AFQDISTYFSGEEWGKLTEWQKSAYMYMKRNYTRMTGV
232	SSX ortho/para		ENSMUSP00000100066	mmus	Mus musculus	house mouse	Mammalia	MCG116991, isoform CRA_b; Protein Ssx9; SSXB4 protein	METLRSCEKIPMEVLYEPKNICKAFQDISTYYSDEEWGKLTQWQKSAYVYMKRNYIRMTDLGVTMNQPVFMRGKEQAKQSLFEGIEVHDSDVECFEGSFGVIPRKRMKLTLVTISIRNVEERLASGEHDSNLAETGGIQVNVWSNRLRERKYRVIYSEISYPEEEEDDDY		IPR003655 [KRAB-related]	IPR001909 [KRAB]	IPR019041 [SSXRD]			1/1:22:61	6.2e-07	CKAFQDISTYYSDEEWGKLTQWQKSAYVYMKRNYIRMTDL	1/1:24:61	6.9e-13	AFQDISTYYSDEEWGKLTQWQKSAYVYMKRNYIRMTDL	1/1:24:61	4.7e-20	AFQDISTYYSDEEWGKLTQWQKSAYVYMKRNYIRMTDL	1/1:24:61	9.1e-09	AFQDISTYYSDEEWGKLTQWQKSAYVYMKRNYIRMTDL	1/1:24:61	8e-20	AFQDISTYYSDEEWGKLTQWQKSAYVYMKRNYIRMTDL
233	SSX ortho/para		Q6XAR5	mmus	Mus musculus	house mouse	Mammalia	387589 [Gene Symbol: Ssxb12] [Locus Tag: ] [Chromosome: X] [Map Location: XA1.1|X] [Description: synovial sarcoma, X member B12] [Gene Type: protein-coding]	METVSSCEKVPMEVLYEPKNICKAFQDISTYYSDEEWGKLTQWQKSAYVYMKRNYIRMTDLGVTMNQPVFMRGKEQAKQSLVEGIEVHDSEDECFEGSFGVTPIKRMKLTSVTISFHNVEGSLASGENDCNLAETGGIQVNVWSHRLRERKYRVIYSEISDTEEEEDDDY			PF01352 [KRAB]	PF09514 [SSXRD]			1/1:22:61	6.2e-07	CKAFQDISTYYSDEEWGKLTQWQKSAYVYMKRNYIRMTDL	1/1:24:61	6.9e-13	AFQDISTYYSDEEWGKLTQWQKSAYVYMKRNYIRMTDL	1/1:24:61	4.7e-20	AFQDISTYYSDEEWGKLTQWQKSAYVYMKRNYIRMTDL	1/1:24:61	9.1e-09	AFQDISTYYSDEEWGKLTQWQKSAYVYMKRNYIRMTDL	1/1:24:61	8e-20	AFQDISTYYSDEEWGKLTQWQKSAYVYMKRNYIRMTDL
234	SSX ortho/para		ENSMUSP00000094256	mmus	Mus musculus	house mouse	Mammalia	Uncharacterized protein	VKTDSSYTKSPRDIFKPEKMSKSFQDISKYFSEEEWESLTKWQKSAYVFMKRNYIRMTGLGVTVNKPVFMRGKDQITEFLLKESDEGLGHANEG		IPR003655 [KRAB-related]	IPR001909 [KRAB]				1/1:21:60	2.3e-08	SKSFQDISKYFSEEEWESLTKWQKSAYVFMKRNYIRMTGL	1/1:23:60	6.6e-14	SFQDISKYFSEEEWESLTKWQKSAYVFMKRNYIRMTGL	1/1:23:60	3.8e-20	SFQDISKYFSEEEWESLTKWQKSAYVFMKRNYIRMTGL	1/1:23:60	4.9e-10	SFQDISKYFSEEEWESLTKWQKSAYVFMKRNYIRMTGL	1/1:23:60	1.8e-20	SFQDISKYFSEEEWESLTKWQKSAYVFMKRNYIRMTGL
235	SSX ortho/para		ENSMPUP00000013367	mput	Mustela putorius furo	Ferret	Mammalia	Uncharacterized protein	MNKGSSFAKNSKEDTQKSEKKCKAFKDISKYFSKEEWAKLGYSDKITYVYMKRNYDTMTSLGLRATLPAFMCPKKRAMQSNGRDSDDDQNENQAQDEAVMGFGSRFRNHQKVMLEKTIKEESDSEPIPITPGPEQAQKEPCPPEKASTSDQQSLNECSGKKLMSSVWAYRLRERKTLIVYEEISDPEEDD		IPR003655 [KRAB-related]	IPR001909 [KRAB]	IPR019041 [SSXRD]			1/1:22:61	2.2e-07	CKAFKDISKYFSKEEWAKLGYSDKITYVYMKRNYDTMTSL	1/1:24:61	8.2e-19	AFKDISKYFSKEEWAKLGYSDKITYVYMKRNYDTMTSL	1/1:24:61	2.3e-24	AFKDISKYFSKEEWAKLGYSDKITYVYMKRNYDTMTSL	1/1:24:61	6.6e-11	AFKDISKYFSKEEWAKLGYSDKITYVYMKRNYDTMTSL	1/1:24:61	3.3e-27	AFKDISKYFSKEEWAKLGYSDKITYVYMKRNYDTMTSL
236	SSX ortho/para		L5MJM8	mdav	Myotis davidii	David's myotis	Mammalia	KRAB-related domain-containing protein	AFKDIRKYFTEEDWAKLGNSEKRTCVSMKRNYEIMTGLGLMTNCPDFMRPKNWTTKSEHDSDEDWDPGNEESKKEETHVWVSRLRERKDPVVYQEISDPEDDD				PF09514 [SSXRD]			1/1:1:38	3.1e-05	AFKDIRKYFTEEDWAKLGNSEKRTCVSMKRNYEIMTGL	1/1:1:38	2.1e-17	AFKDIRKYFTEEDWAKLGNSEKRTCVSMKRNYEIMTGL	1/1:1:38	3e-20	AFKDIRKYFTEEDWAKLGNSEKRTCVSMKRNYEIMTGL	1/1:1:38	1.7e-09	AFKDIRKYFTEEDWAKLGNSEKRTCVSMKRNYEIMTGL	1/1:1:38	4.2e-23	AFKDIRKYFTEEDWAKLGNSEKRTCVSMKRNYEIMTGL
237	SSX ortho/para		ENSMLUP00000001640	mluc	Myotis lucifugus	Little brown bat	Mammalia	Uncharacterized protein	MNRESSLDNNPMEGSQDSEEKCKAFKDIRKYFTKEEWAKLRNSEKRTCVCLKRNYEIMTGLGLMTTCPDFMRPKNWTTKSGHDSDEDWNPGNEVLEVLQISPHFTPFAPLHPSPTPSQAFTYLLSMSMIALEDQPQQHHKSCWTGADPMEQDLLQLTESKKEETNVWVGRLRERKNRVVYQEISDPEDDD		IPR003655 [KRAB-related]	IPR001909 [KRAB]	IPR019041 [SSXRD]			1/1:22:61	1.2e-05	CKAFKDIRKYFTKEEWAKLRNSEKRTCVCLKRNYEIMTGL	1/1:24:61	2.7e-16	AFKDIRKYFTKEEWAKLRNSEKRTCVCLKRNYEIMTGL	1/1:24:61	7.8e-21	AFKDIRKYFTKEEWAKLRNSEKRTCVCLKRNYEIMTGL	1/1:24:61	2.2e-10	AFKDIRKYFTKEEWAKLRNSEKRTCVCLKRNYEIMTGL	1/1:24:61	1.7e-23	AFKDIRKYFTKEEWAKLRNSEKRTCVCLKRNYEIMTGL
238	SSX ortho/para		A0A2Y9G7U4	nsch	Neomonachus schauinslandi	Hawaiian monk seal	Mammalia	110571275 [Gene Symbol: LOC110571275] [Locus Tag: ] [Chromosome: X] [Map Location: ] [Description: putative protein SSX6] [Gene Type: protein-coding]	MNKDGSFSKNSKEDTQKSEKKCKAFKDISKYFSKEEWAKLGYSDKITYVYMKRNYDTMTGLGLRATLPAFMCPKKGAMKSSGHDSDEDQDPKNQGEPRQGPSDVQDREQMKVMLKKPIKEESDSEPIPITPGPEQAQKELCPPGKASTSGQQSENIPGPRRGMNSIWAYRLRERKNLIVYEEISDPEEDD			PF01352 [KRAB]	PF09514 [SSXRD]			1/1:22:61	1.4e-06	CKAFKDISKYFSKEEWAKLGYSDKITYVYMKRNYDTMTGL	1/1:24:61	3.6e-18	AFKDISKYFSKEEWAKLGYSDKITYVYMKRNYDTMTGL	1/1:24:61	1.6e-24	AFKDISKYFSKEEWAKLGYSDKITYVYMKRNYDTMTGL	1/1:24:61	4e-10	AFKDISKYFSKEEWAKLGYSDKITYVYMKRNYDTMTGL	1/1:24:61	9.4e-27	AFKDISKYFSKEEWAKLGYSDKITYVYMKRNYDTMTGL
239	SSX ortho/para		A0A341DDK8	nasi	Neophocaena asiaeorientalis	Yangtze finless porpoise	Mammalia	112415993 [Gene Symbol: LOC112415993] [Locus Tag: ] [Chromosome: Un] [Map Location: ] [Description: protein SSX7-like] [Gene Type: protein-coding]	MLHCRFTSEDISKYFSKKEWADLGYSEKITYVYMKRNYDIMTDLVQKEKTPSKLVPVTSGSEQAQEQLCPPGKANTSGQQSKKTSGHRRREIYVWTHRLRERKNLVVYEEISDSEEDD				PF09514 [SSXRD]			1/1:5:44	1.2e-05	RFTSEDISKYFSKKEWADLGYSEKITYVYMKRNYDIMTDL	1/1:7:44	7e-17	TSEDISKYFSKKEWADLGYSEKITYVYMKRNYDIMTDL	1/1:7:44	2.2e-22	TSEDISKYFSKKEWADLGYSEKITYVYMKRNYDIMTDL	1/1:7:44	4.8e-10	TSEDISKYFSKKEWADLGYSEKITYVYMKRNYDIMTDL	1/1:7:44	4.1e-25	TSEDISKYFSKKEWADLGYSEKITYVYMKRNYDIMTDL
240	SSX ortho/para		A0A1A6GKX3	nlep	Neotoma lepida	Desert woodrat	Mammalia	KRAB-related domain-containing protein	MNLGKTEHKPEKICRAFESISRHFSKEEWAKLSHSEKITYVSMKKIYTTMISLGLNERNVSIWSHRLRERKKPVIYEEISDPEEEDEDEEEEGWTCK			PF01352 [KRAB]	PF09514 [SSXRD]			1/1:14:53	2.3e-06	CRAFESISRHFSKEEWAKLSHSEKITYVSMKKIYTTMISL	1/1:16:53	3.3e-16	AFESISRHFSKEEWAKLSHSEKITYVSMKKIYTTMISL	1/1:16:53	6.4e-19	AFESISRHFSKEEWAKLSHSEKITYVSMKKIYTTMISL	1/1:16:53	1.6e-10	AFESISRHFSKEEWAKLSHSEKITYVSMKKIYTTMISL	1/1:16:53	7.4e-22	AFESISRHFSKEEWAKLSHSEKITYVSMKKIYTTMISL
241	SSX ortho/para		A0A1A6FU20	nlep	Neotoma lepida	Desert woodrat	Mammalia	KRAB-related domain-containing protein	DFEVIATYFSEEEWAKLTKWQKSAYVYMRRNYIRMTGLGVTVNQPVFMRGKEELEYTVHGHDTAESGIWVNTWSHRLRERKTRVIYEEISDPEESDDDE			PF01352 [KRAB]	PF09514 [SSXRD]			1/1:1:38	1.3e-06	DFEVIATYFSEEEWAKLTKWQKSAYVYMRRNYIRMTGL	1/1:1:38	3.4e-12	DFEVIATYFSEEEWAKLTKWQKSAYVYMRRNYIRMTGL	1/1:1:38	4.4e-19	DFEVIATYFSEEEWAKLTKWQKSAYVYMRRNYIRMTGL	1/1:1:38	2.1e-08	DFEVIATYFSEEEWAKLTKWQKSAYVYMRRNYIRMTGL	1/1:1:38	1.8e-19	DFEVIATYFSEEEWAKLTKWQKSAYVYMRRNYIRMTGL
242	SSX ortho/para		A0A1A6HUY3	nlep	Neotoma lepida	Desert woodrat	Mammalia	KRAB-related domain-containing protein	MSKSFMDISKYFSEEEWAKLTKWQKSAYVFMKRNYIRMTGLGVRVNQPVFMRGKEFLMKESEEDHGHESGDEHSERIFGIAQTKGLK			PF01352 [KRAB]				1/1:2:41	8.7e-08	SKSFMDISKYFSEEEWAKLTKWQKSAYVFMKRNYIRMTGL	1/1:4:41	1.7e-13	SFMDISKYFSEEEWAKLTKWQKSAYVFMKRNYIRMTGL	1/1:4:41	4.5e-20	SFMDISKYFSEEEWAKLTKWQKSAYVFMKRNYIRMTGL	1/1:4:41	1.8e-09	SFMDISKYFSEEEWAKLTKWQKSAYVFMKRNYIRMTGL	1/1:4:41	3.2e-20	SFMDISKYFSEEEWAKLTKWQKSAYVFMKRNYIRMTGL
243	SSX ortho/para		ENSOPRP00000012334	opri	Ochotona princeps	Southern American pika	Mammalia		SLRADPQKSDKLQAFQDISQYFSKKEWEKMGYSEKITYVYTKRNYTTMTRLGFKRAMPDFMRSGIHAKRSCESDSDEEQNTNAERRXXXXXXXXXXXXXXXXXVIQQPVKQENISKVIRGATKSGGTKKKPPRQGTPSTHGKQVVMSAVKKEESGVWSHRLRERKYVVAYEEISDPEEED		IPR003655 [KRAB-related]	IPR001909 [KRAB]	IPR019041 [SSXRD]			1/1:12:51	9.5e-06	LQAFQDISQYFSKKEWEKMGYSEKITYVYTKRNYTTMTRL	1/1:14:51	1.7e-17	AFQDISQYFSKKEWEKMGYSEKITYVYTKRNYTTMTRL	1/1:14:51	5.7e-24	AFQDISQYFSKKEWEKMGYSEKITYVYTKRNYTTMTRL	1/1:14:51	2e-08	AFQDISQYFSKKEWEKMGYSEKITYVYTKRNYTTMTRL	1/1:14:51	6.3e-25	AFQDISQYFSKKEWEKMGYSEKITYVYTKRNYTTMTRL
244	SSX ortho/para		A0A2U3ZDA8	oros	Odobenus rosmarus divergens	Pacific walrus	Mammalia	101371860 [Gene Symbol: LOC101371860] [Locus Tag: ] [Chromosome: Un] [Map Location: ] [Description: putative protein SSX6] [Gene Type: protein-coding]	MNKGGSFSKNSKEDTEKSEKKCKAFKDISKYFSKEEWANLGYSDKITYVYMKRNYDTMTSLGLKATLPAFMCSKKRAKQSSGCDSDEDQNPKNQGEPPEGPSDVQDQMQMKVMLEKQIKEESDSEQIPITPGSEQPQKELCPLGKASTSGQESENIPGPRKRMSSIWACRLRERKNLIVYEEISDPEEDD			PF01352 [KRAB]	PF09514 [SSXRD]			1/1:22:61	2.4e-07	CKAFKDISKYFSKEEWANLGYSDKITYVYMKRNYDTMTSL	1/1:24:61	2.6e-18	AFKDISKYFSKEEWANLGYSDKITYVYMKRNYDTMTSL	1/1:24:61	6.3e-24	AFKDISKYFSKEEWANLGYSDKITYVYMKRNYDTMTSL	1/1:24:61	5.8e-11	AFKDISKYFSKEEWANLGYSDKITYVYMKRNYDTMTSL	1/1:24:61	8.9e-27	AFKDISKYFSKEEWANLGYSDKITYVYMKRNYDTMTSL
245	SSX ortho/para		1642922_OORCA	oorc	Orcinus orca	Orca	Mammalia		MNRGRSFEKSPREDSQKSEKNSKAFKDISKYFSKKEWADLGYSEKITYVYMKRNYDIMTDLGNRKFCVQTRLGTNDHPSLHAMASS		IPR003655 [KRAB-related]	IPR001909 [KRAB]				1/1:22:61	3.1e-06	SKAFKDISKYFSKKEWADLGYSEKITYVYMKRNYDIMTDL	1/1:24:61	8e-19	AFKDISKYFSKKEWADLGYSEKITYVYMKRNYDIMTDL	1/1:24:61	7.3e-24	AFKDISKYFSKKEWADLGYSEKITYVYMKRNYDIMTDL	1/1:24:61	2.4e-10	AFKDISKYFSKKEWADLGYSEKITYVYMKRNYDIMTDL	1/1:24:61	2.3e-26	AFKDISKYFSKKEWADLGYSEKITYVYMKRNYDIMTDL
246	SSX ortho/para		ENSOCUP00000006909	ocun	Oryctolagus cuniculus	Rabbit	Mammalia	Uncharacterized protein	MSTNGSLPMSHSADSQKSEKTCKAFKDISQYFSKKEWEKLEYSEKITYVYMKRNYTTMTKLGFKTVVPAFMCSGRNAEKSQEDDPDAVTWEVAAPHASWLSENRLMPKVTKKPAKRRNNSRGMPRTSYSGQAKKKRNLEHLSTSGEHDVVSEPRKKEINVWSHRLRERKYVVAYEEISDPEEED		IPR003655 [KRAB-related]	IPR001909 [KRAB]	IPR019041 [SSXRD]			1/1:22:61	8.8e-07	CKAFKDISQYFSKKEWEKLEYSEKITYVYMKRNYTTMTKL	1/1:24:61	1e-17	AFKDISQYFSKKEWEKLEYSEKITYVYMKRNYTTMTKL	1/1:24:61	2.9e-24	AFKDISQYFSKKEWEKLEYSEKITYVYMKRNYTTMTKL	1/1:24:61	1.4e-09	AFKDISQYFSKKEWEKLEYSEKITYVYMKRNYTTMTKL	1/1:24:61	3.8e-25	AFKDISQYFSKKEWEKLEYSEKITYVYMKRNYTTMTKL
247	SSX ortho/para		A0A2Y9F6M4	pcat	Physeter catodon	Sperm whale	Mammalia	102994465 [Gene Symbol: LOC102994465] [Locus Tag: ] [Chromosome: 21] [Map Location: ] [Description: protein SSX1-like] [Gene Type: protein-coding]	MNRGSSFAKSPREYSQKSEKNSKAFKDISKYFSKKEWADLGYSEKITYVYMKRNYDTMTDLGLKATLPTFMCPKKXATKSSGHDSKGRNPRNQRKVMPKKSEKKKYPSKLVPETSGSEQAQEQLCPPGKANTSGQQSTETSGPRRRKIDVWTHSLQEEKNLVVYEEICDPKEDD				PF09514 [SSXRD]			1/1:22:61	2.2e-06	SKAFKDISKYFSKKEWADLGYSEKITYVYMKRNYDTMTDL	1/1:24:61	2e-19	AFKDISKYFSKKEWADLGYSEKITYVYMKRNYDTMTDL	1/1:24:61	3.2e-24	AFKDISKYFSKKEWADLGYSEKITYVYMKRNYDTMTDL	1/1:24:61	2.3e-10	AFKDISKYFSKKEWADLGYSEKITYVYMKRNYDTMTDL	1/1:24:61	9.5e-27	AFKDISKYFSKKEWADLGYSEKITYVYMKRNYDTMTDL
248	SSX ortho/para		ENSPVAP00000014580	pvam	Pteropus vampyrus	Large flying fox	Mammalia		AFKDICKYFSKEEWAKLGNSQKCTYVYMKRNYDTMTGLGLNATLPAFMNPNKQTAKSPENDSHEDQNLGNQDERPQKTSDLQHLKMPKKPGSKEHDLKTLPETHGSEPAQKQLCPPGKEIASSQQMEKSAGPRHRHVWAYRLRERKNIVMYEEISDLEEDD		IPR003655 [KRAB-related]	IPR001909 [KRAB]	IPR019041 [SSXRD]			1/1:1:38	4e-07	AFKDICKYFSKEEWAKLGNSQKCTYVYMKRNYDTMTGL	1/1:1:38	5.3e-17	AFKDICKYFSKEEWAKLGNSQKCTYVYMKRNYDTMTGL	1/1:1:38	2.6e-23	AFKDICKYFSKEEWAKLGNSQKCTYVYMKRNYDTMTGL	1/1:1:38	5.2e-10	AFKDICKYFSKEEWAKLGNSQKCTYVYMKRNYDTMTGL	1/1:1:38	2.7e-25	AFKDICKYFSKEEWAKLGNSQKCTYVYMKRNYDTMTGL
249	SSX ortho/para		ENSPVAP00000001670	pvam	Pteropus vampyrus	Large flying fox	Mammalia		MNRGSSFAKSPGEDSQKSVEKSEHAVCDLALHLHPLSPFWKVRGEPATSSAALHAMGEAKTFKDICKYFSKEEWAKLGNSQKRTYACLKRNYDTMTGLTKSSENDFDEDQNLKNQDECPQEASNVQQRNHPKMPMKPVEENDLKPLPVTPGSEPAQNQLCPLGEESASVQQNEKMPESRQGRQVWDLGLQEKECLLIYEDISDTEEDSQ		IPR003655 [KRAB-related]	IPR001909 [KRAB]				1/1:59:98	2e-07	AKTFKDICKYFSKEEWAKLGNSQKRTYACLKRNYDTMTGL	1/1:61:98	2.6e-16	TFKDICKYFSKEEWAKLGNSQKRTYACLKRNYDTMTGL	1/1:61:98	2.5e-20	TFKDICKYFSKEEWAKLGNSQKRTYACLKRNYDTMTGL	1/1:61:98	6.4e-11	TFKDICKYFSKEEWAKLGNSQKRTYACLKRNYDTMTGL	1/1:61:98	1.7e-23	TFKDICKYFSKEEWAKLGNSQKRTYACLKRNYDTMTGL
250	SSX ortho/para		ENSRNOP00000064611	rnor	Rattus norvegicus	Rat	Mammalia	Protein LOC100911707	PSAMTHSVNLRKTKHKPEEACKAFEDISKYFSREEWAKLSHSEKITYVYMKRNYTTMTNLGLRAHLPDFMESNEQATKSVLNDSDEVFSHESQGLRRRPVSIWSHRLRERKKQVIYEEISDPEDEKEEREE		IPR003655 [KRAB-related]	IPR001909 [KRAB]	IPR019041 [SSXRD]			1/1:21:60	2.8e-07	CKAFEDISKYFSREEWAKLSHSEKITYVYMKRNYTTMTNL	1/1:23:60	6.4e-19	AFEDISKYFSREEWAKLSHSEKITYVYMKRNYTTMTNL	1/1:23:60	5.7e-24	AFEDISKYFSREEWAKLSHSEKITYVYMKRNYTTMTNL	1/1:23:60	4.2e-10	AFEDISKYFSREEWAKLSHSEKITYVYMKRNYTTMTNL	1/1:23:60	8e-26	AFEDISKYFSREEWAKLSHSEKITYVYMKRNYTTMTNL
251	SSX ortho/para		ENSRNOP00000037344	rnor	Rattus norvegicus	Rat	Mammalia	Protein Ssx1	ILKRSQRLTALVAESLETAESSVYYFLSEEDKMVSFQNHSDPIGTKTVSSCAKIPMEVFCEPKNICKAFQDISAYFSDEEWGKLTKWQKSAYVYMKRNYIRMTGLGVTVNQPVFMRCKEQAKQSVVECIEVHDSEDECSDETYGVPPRKRMKLASVTISIHNVKGRLASGKNGSNLAGAGGIQVNAWSHRLRERKTRVIYEEISDPEEDDED		IPR003655 [KRAB-related]	IPR001909 [KRAB]	IPR019041 [SSXRD]			1/1:66:105	5.2e-08	CKAFQDISAYFSDEEWGKLTKWQKSAYVYMKRNYIRMTGL	1/1:68:105	6.8e-15	AFQDISAYFSDEEWGKLTKWQKSAYVYMKRNYIRMTGL	1/1:68:105	8.2e-21	AFQDISAYFSDEEWGKLTKWQKSAYVYMKRNYIRMTGL	1/1:68:105	1.4e-09	AFQDISAYFSDEEWGKLTKWQKSAYVYMKRNYIRMTGL	1/1:68:105	1.6e-21	AFQDISAYFSDEEWGKLTKWQKSAYVYMKRNYIRMTGL
252	SSX ortho/para		ENSRNOP00000067552	rnor	Rattus norvegicus	Rat	Mammalia	Uncharacterized protein	SMSTKFLQSSSIRELKPKISQNILENENIIFFDTFHKVMNTDSSCTKSPGDILKPEKMSKSFKDISKYFSEEEWAKLTKWQKSAYIFMKRNYIRMTDLGVMVNQPVFMRGKDQITESLMKESDIFDMEHTKGLKVSI		IPR003655 [KRAB-related]	IPR001909 [KRAB]				1/1:59:98	4e-08	SKSFKDISKYFSEEEWAKLTKWQKSAYIFMKRNYIRMTDL	1/1:61:98	5.8e-15	SFKDISKYFSEEEWAKLTKWQKSAYIFMKRNYIRMTDL	1/1:61:98	9.2e-20	SFKDISKYFSEEEWAKLTKWQKSAYIFMKRNYIRMTDL	1/1:61:98	1.4e-09	SFKDISKYFSEEEWAKLTKWQKSAYIFMKRNYIRMTDL	1/1:61:98	1.5e-19	SFKDISKYFSEEEWAKLTKWQKSAYIFMKRNYIRMTDL
253	SSX ortho/para	SSX1	D3ZMV2	rnor	Rattus norvegicus	Rat	Mammalia	KRAB-related domain-containing protein	SFKDISKYFSEEEWAKLTKWQKSAYMFMKRNYIRMTDLGVMVNQPVFMRRKDQITESLMKESDEGNGHENEGSDIKLPKRVRMICHRELYSSERRPDVQF			PF01352 [KRAB]				1/1:1:38	2.6e-07	SFKDISKYFSEEEWAKLTKWQKSAYMFMKRNYIRMTDL	1/1:1:38	6e-15	SFKDISKYFSEEEWAKLTKWQKSAYMFMKRNYIRMTDL	1/1:1:38	2.4e-19	SFKDISKYFSEEEWAKLTKWQKSAYMFMKRNYIRMTDL	1/1:1:38	7.3e-10	SFKDISKYFSEEEWAKLTKWQKSAYMFMKRNYIRMTDL	1/1:1:38	9.9e-20	SFKDISKYFSEEEWAKLTKWQKSAYMFMKRNYIRMTDL
254	SSX ortho/para		ENSSARP00000010807	sara	Sorex araneus	Eurasian common shrew	Mammalia		MSKNSLLENLGQQDAQTTEKKSKVRQVSHLDLHLVTFSAFWRVASALLNARGETRECYSYPHAFEDISKYFSETQWKNMLYSEKTTCVYLKRNYEIMSGLGFNVPLPDFMRRNNNNSARFRWTHFKHADQKNQSEAVSKGKQEETVM		IPR003655 [KRAB-related]	IPR001909 [KRAB]				1/1:61:100	0.00018	PHAFEDISKYFSETQWKNMLYSEKTTCVYLKRNYEIMSGL	1/1:63:100	1e-11	AFEDISKYFSETQWKNMLYSEKTTCVYLKRNYEIMSGL	1/1:63:100	2.5e-20	AFEDISKYFSETQWKNMLYSEKTTCVYLKRNYEIMSGL	1/1:63:100	5.5e-07	AFEDISKYFSETQWKNMLYSEKTTCVYLKRNYEIMSGL	1/1:63:100	1.9e-20	AFEDISKYFSETQWKNMLYSEKTTCVYLKRNYEIMSGL
255	SSX ortho/para		ENSSSCP00000021989	sscr	Sus scrofa	Pig	Mammalia	Uncharacterized protein	MNRGSYFAQRAREDAQKSEKKSKAFNDISKYFSKEEWAKLGYSEKITYVYMKRNYDTMTGLGLKATPPTFMCPRKQTIESSGHDSEEKNLLLLDEPPKEASNLRGRKYLEVMPKTPEKEKNLLELGPTTSGSEKAPSEPCLLGKASASAQQSKETSGSGRSKINVWTHRLRERKYPVIYEEISDPEED		IPR003655 [KRAB-related]	IPR001909 [KRAB]	IPR019041 [SSXRD]			1/1:22:61	1.2e-06	SKAFNDISKYFSKEEWAKLGYSEKITYVYMKRNYDTMTGL	1/1:24:61	7.4e-19	AFNDISKYFSKEEWAKLGYSEKITYVYMKRNYDTMTGL	1/1:24:61	6.7e-25	AFNDISKYFSKEEWAKLGYSEKITYVYMKRNYDTMTGL	1/1:24:61	1.5e-10	AFNDISKYFSKEEWAKLGYSEKITYVYMKRNYDTMTGL	1/1:24:61	1.7e-27	AFNDISKYFSKEEWAKLGYSEKITYVYMKRNYDTMTGL
256	SSX ortho/para		2172637_TMANA	tman	Trichechus manatus	Caribbean manatee	Mammalia		MGVSKDRVTRRGGLFGGDKRSFGLVVGETQAISLQDQTSNQHHEQRQLLCKELRGGYPETREEKLGEVIYRKQRNGPGDGAFKDISKYFSKEEWAELGYSEKVTYVYMKRSYDTMTNLGLRATLPPFMHPNRWATKSQLDDSDEDQNPGTQDEPPQMASSVQQSEHPKVSIAQI		IPR003655 [KRAB-related]	IPR001909 [KRAB]				1/1:79:118	8.4e-06	DGAFKDISKYFSKEEWAELGYSEKVTYVYMKRSYDTMTNL	1/1:81:118	5.4e-19	AFKDISKYFSKEEWAELGYSEKVTYVYMKRSYDTMTNL	1/1:81:118	4.8e-23	AFKDISKYFSKEEWAELGYSEKVTYVYMKRSYDTMTNL	1/1:81:118	2.9e-11	AFKDISKYFSKEEWAELGYSEKVTYVYMKRSYDTMTNL	1/1:81:118	2.6e-26	AFKDISKYFSKEEWAELGYSEKVTYVYMKRSYDTMTNL
257	SSX ortho/para		ENSTBEP00000001484	tbel	Tupaia belangeri	Common tree shrew	Mammalia		VNRSSFFDKSRRKDTRKLEKKCKVKQHVCDFHLVTLSSCLLPARNKAWEYSHAFNDISKYFSKKEWAKLNYSEKTTYAYMKRNYDTMTSLGLQTTVPDFMSSSEQTQIPQEKNSDEDQNLGSQXXXXXXXXXXXXXXXXXXXXXXXXXXXXXXXXXXXXXXXXXXXXXXXXXXXXXXXXXXXXXXXPEEKEKSIWAHRLRERKNPVVYEEISDPEEED		IPR003655 [KRAB-related]	IPR001909 [KRAB]	IPR019041 [SSXRD]			1/1:51:90	2.4e-08	SHAFNDISKYFSKKEWAKLNYSEKTTYAYMKRNYDTMTSL	1/1:53:90	2.2e-17	AFNDISKYFSKKEWAKLNYSEKTTYAYMKRNYDTMTSL	1/1:53:90	7.3e-23	AFNDISKYFSKKEWAKLNYSEKTTYAYMKRNYDTMTSL	1/1:53:90	5.9e-12	AFNDISKYFSKKEWAKLNYSEKTTYAYMKRNYDTMTSL	1/1:53:90	2e-25	AFNDISKYFSKKEWAKLNYSEKTTYAYMKRNYDTMTSL
258	SSX ortho/para		L8YB62	tchi	Tupaia chinensis	Chinese tree shrew	Mammalia	-	MSDVAVDTSSEITTKNLKEKEVVEEAENGRDAPANGNANDESGKEEAENEAFNDISKYFSKKEWAKLNYSEKTTYAYMKRNYDTMTSLGLQTTVPDFMSSSEQTQIPQEKNSDEDQNLGSQGPEEKEKSIWAHRLRERKNPVVYEEISDPEEED			PF01352 [KRAB]	PF09514 [SSXRD]			1/1:49:88	1.7e-07	NEAFNDISKYFSKKEWAKLNYSEKTTYAYMKRNYDTMTSL	1/1:51:88	2.2e-17	AFNDISKYFSKKEWAKLNYSEKTTYAYMKRNYDTMTSL	1/1:51:88	7.3e-23	AFNDISKYFSKKEWAKLNYSEKTTYAYMKRNYDTMTSL	1/1:51:88	5.9e-12	AFNDISKYFSKKEWAKLNYSEKTTYAYMKRNYDTMTSL	1/1:51:88	2e-25	AFNDISKYFSKKEWAKLNYSEKTTYAYMKRNYDTMTSL
259	SSX ortho/para		A0A2U4C0I2	ttru	Tursiops truncatus	Atlantic bottle-nosed dolphin	Mammalia	101327694 [Gene Symbol: LOC101327694] [Locus Tag: ] [Chromosome: Un] [Map Location: ] [Description: protein SSX4-like] [Gene Type: protein-coding]	MNRGRSFEKSPREDSQKSEKNSKAFKDISKYFSKKEWADLGYSEKITYVYMKRNYDIMTDLGNRKFCKVMPKKSKKKKNPSKLVPVTSGSEXAQEQLCPPGKANTSGQQSKKTSGHRRREINVWTHRLRERKNLVVYKEISDSEEDD				PF09514 [SSXRD]			1/1:22:61	3.1e-06	SKAFKDISKYFSKKEWADLGYSEKITYVYMKRNYDIMTDL	1/1:24:61	8e-19	AFKDISKYFSKKEWADLGYSEKITYVYMKRNYDIMTDL	1/1:24:61	7.3e-24	AFKDISKYFSKKEWADLGYSEKITYVYMKRNYDIMTDL	1/1:24:61	2.4e-10	AFKDISKYFSKKEWADLGYSEKITYVYMKRNYDIMTDL	1/1:24:61	2.3e-26	AFKDISKYFSKKEWADLGYSEKITYVYMKRNYDIMTDL
260	SSX ortho/para		A0A3Q7X423	uarc	Ursus arctos horribilis	grizzly bear	Mammalia	-	MNKGSSFAKNSREDTQKSEKKCKAFKDISKYFSKEEWAKLGYSDKITYVYMKRNYDTMTGLGLRATLPDFMCPKKQAVKSSGHDSDDNQNPKNQDESSQGASDVQEREQMKVMLEKPIKEESDSEPIPITPGFEQAQKELYPPGKASTSKGLNECSGPRKGVNSIWAYRLRERKNLIVYEEISDPEEDD			PF01352 [KRAB]	PF09514 [SSXRD]			1/1:22:61	1.4e-06	CKAFKDISKYFSKEEWAKLGYSDKITYVYMKRNYDTMTGL	1/1:24:61	3.6e-18	AFKDISKYFSKEEWAKLGYSDKITYVYMKRNYDTMTGL	1/1:24:61	1.6e-24	AFKDISKYFSKEEWAKLGYSDKITYVYMKRNYDTMTGL	1/1:24:61	4e-10	AFKDISKYFSKEEWAKLGYSDKITYVYMKRNYDTMTGL	1/1:24:61	9.4e-27	AFKDISKYFSKEEWAKLGYSDKITYVYMKRNYDTMTGL
261	SSX ortho/para		A0A384CMM4	umar	Ursus maritimus	polar bear	Mammalia	-	MNKGSSFAKNSREDTQKSEKKCKAFKDISKYFSKEEWAKLGYSDKITYVYMKRNYDTMTGLGLRATLPDFMCPKKQAVKSSGHDSDDNQNPKNQDESSQGASDVQEREQMKVMLEKPIKEESDSEPIPITPGFEQAQKELYPPGKASTSKGLNECSGPRKGVNSIWAYRLRERKNLIVYEEISDPEEDD			PF01352 [KRAB]	PF09514 [SSXRD]			1/1:22:61	1.4e-06	CKAFKDISKYFSKEEWAKLGYSDKITYVYMKRNYDTMTGL	1/1:24:61	3.6e-18	AFKDISKYFSKEEWAKLGYSDKITYVYMKRNYDTMTGL	1/1:24:61	1.6e-24	AFKDISKYFSKEEWAKLGYSDKITYVYMKRNYDTMTGL	1/1:24:61	4e-10	AFKDISKYFSKEEWAKLGYSDKITYVYMKRNYDTMTGL	1/1:24:61	9.4e-27	AFKDISKYFSKEEWAKLGYSDKITYVYMKRNYDTMTGL
262	SSX ortho/para		ENSVPAP00000011078	vpac	Vicugna pacos	Alpaca	Mammalia		MNRGSSFVKNSSDDTQKLEKKSKHLWIQVCVLAPLWVALSPFWKVSRAIKHLLHTRGEAGAFKDISKYFSKEEWANLAYSEKITYVYMKRNYETMTGLGLKASLPNFMCPRRPTIKFGERDSEDKNPGNQKEFPQEVFNMQERKQLKVLPEKREKETGSQQAPKKLCPVEQESSSDQQIKEIPGPKIERVKVWANRLRERKYRVIYEEISDPEEDD		IPR003655 [KRAB-related]	IPR001909 [KRAB]	IPR019041 [SSXRD]			1/1:59:98	8.9e-07	AGAFKDISKYFSKEEWANLAYSEKITYVYMKRNYETMTGL	1/1:61:98	1.7e-18	AFKDISKYFSKEEWANLAYSEKITYVYMKRNYETMTGL	1/1:61:98	2.6e-24	AFKDISKYFSKEEWANLAYSEKITYVYMKRNYETMTGL	1/1:61:98	3e-10	AFKDISKYFSKEEWANLAYSEKITYVYMKRNYETMTGL	1/1:61:98	4.1e-26	AFKDISKYFSKEEWANLAYSEKITYVYMKRNYETMTGL
263	SSX ortho/para		A0A3Q7QVU5	vvul	Vulpes vulpes	red fox	Mammalia	KRAB-related domain-containing protein; putative protein SSX6 according to NCBI XP_025838289	MNKGSSFAKSSREDTQKSEKKCKAFKDISKYFSKQEWAKLGYSDKITYVYMKRNYDTMTGLGLRATLPAFMCPKKRAIKSKRHDSDENENHRNQNEPLQEVSNVKKRKHQKVMLKTVKEEEDSDPIPITPGFEQAQKVLCLPGKACTSDQQSEIIPGPKRGKNSIWAYRLRERKNLVVYEEISDPEEED				PF09514 [SSXRD]			1/1:22:61	2.6e-06	CKAFKDISKYFSKQEWAKLGYSDKITYVYMKRNYDTMTGL	1/1:24:61	1.5e-17	AFKDISKYFSKQEWAKLGYSDKITYVYMKRNYDTMTGL	1/1:24:61	3.1e-24	AFKDISKYFSKQEWAKLGYSDKITYVYMKRNYDTMTGL	1/1:24:61	5.8e-10	AFKDISKYFSKQEWAKLGYSDKITYVYMKRNYDTMTGL	1/1:24:61	2.7e-26	AFKDISKYFSKQEWAKLGYSDKITYVYMKRNYDTMTGL
264	SSX ortho/para		A0A2K5E818	anan	Aotus nancymaae	Nancy Ma's night monkey	Primates	KRAB-related domain-containing protein; SSX4-like according to ENSEMBL	MNGDDNSSAKKPGDDEQILEDKCEDFDDIAQYFSKNEWEKLKYSEKSTYAYIKENYESLRRLGFHIPLPLFMHSKWTENFWEDDSHRDSNPGHLVESHTMTFGLFQGLFPQIMPGEPPEEKENDSEAVPETSGTQNDVKPPCSSEKPSTSEKMDKIPEPKRAKHAWTHRLRERKTLVIYEEISDPEEDDE			PF01352 [KRAB]	PF09514 [SSXRD]			1/1:23:62	3.3e-07	CEDFDDIAQYFSKNEWEKLKYSEKSTYAYIKENYESLRRL	1/1:25:62	3e-13	DFDDIAQYFSKNEWEKLKYSEKSTYAYIKENYESLRRL	1/1:25:62	3.1e-19	DFDDIAQYFSKNEWEKLKYSEKSTYAYIKENYESLRRL	1/1:25:62	7.1e-11	DFDDIAQYFSKNEWEKLKYSEKSTYAYIKENYESLRRL	1/1:25:62	1.8e-20	DFDDIAQYFSKNEWEKLKYSEKSTYAYIKENYESLRRL
265	SSX ortho/para		ENSCJAP00000027249	cjac	Callithrix jacchus	White-tufted-ear marmoset	Primates	Uncharacterized protein	MNGDGSFAKNPSDDEQISENKRKAFADIAQYFSKKDWKKLKYSEKITYVYMKRNYEAMRTLGFQVTIPLFMRDKQAEDSQEDDSDRDSNPGNLQMQLILFICDLHITKIMPREPPEEEGNDSEAVPETSGTQNDVKELCYSQCTPMYSGKPKPKRATNAWTHRLRERKNLVIYEEISDPEEEDE		IPR003655 [KRAB-related]	IPR001909 [KRAB]	IPR019041 [SSXRD]			1/1:22:61	3.4e-06	RKAFADIAQYFSKKDWKKLKYSEKITYVYMKRNYEAMRTL	1/1:24:61	4.6e-16	AFADIAQYFSKKDWKKLKYSEKITYVYMKRNYEAMRTL	1/1:24:61	8.9e-23	AFADIAQYFSKKDWKKLKYSEKITYVYMKRNYEAMRTL	1/1:24:61	1.1e-08	AFADIAQYFSKKDWKKLKYSEKITYVYMKRNYEAMRTL	1/1:24:61	8.8e-23	AFADIAQYFSKKDWKKLKYSEKITYVYMKRNYEAMRTL
266	SSX ortho/para		A0A2K5PQT6	ccap	Cebus capucinus imitator	Colombian white-faced capuchin	Primates	SSX1	MNGDDSSAKKPGDDEQISENKRKHPWGQVCYLALHLVTLSPFWKVEREPASNIEAFDDIAQYFSKKEWEKLKYSEKITYVYMKRNYEAMSRLGFQVTLPLFMRNKQAEDSQEDDSDRDSNPGNLVERRTMTFGMFQGLFPQLVPREPPEEENYSEAVPETSGTQNDVKPLTSEKINKITGPKRAKHAWSHRLRERKNLVIYEEISDPEEDDE			PF01352 [KRAB]	PF09514 [SSXRD]			1/1:53:92	9.4e-07	IEAFDDIAQYFSKKEWEKLKYSEKITYVYMKRNYEAMSRL	1/1:55:92	1.4e-16	AFDDIAQYFSKKEWEKLKYSEKITYVYMKRNYEAMSRL	1/1:55:92	1.9e-24	AFDDIAQYFSKKEWEKLKYSEKITYVYMKRNYEAMSRL	1/1:55:92	2.6e-09	AFDDIAQYFSKKEWEKLKYSEKITYVYMKRNYEAMSRL	1/1:55:92	9.2e-25	AFDDIAQYFSKKEWEKLKYSEKITYVYMKRNYEAMSRL
267	SSX ortho/para		A0A2K5NKD4	caty	Cercocebus atys	Sooty mangabey	Primates	105590484 [Gene Symbol: LOC105590484] [Locus Tag: ] [Chromosome: Un] [Map Location: ] [Description: protein SSX7-like] [Gene Type: protein-coding]	MNSDDAFARRPNVGAQIPEKIQKAFDDIAKCFSKKEWEKMKYSEKIIYVYMKRKYEAMTKLGFRVTLPPFMHNKRATDFQRNDFDNDRNCGNQVERPQLSTFSMLQGIFPKIMPKKPAPAEEGNDLKGVSETSGPKNDGKQLCPPGKANTSEKTNKRSGPKRGKHAWTHRLCERKQLVIYEEISDPEEDDE				PF09514 [SSXRD]			1/1:22:61	4.5e-06	QKAFDDIAKCFSKKEWEKMKYSEKIIYVYMKRKYEAMTKL	1/1:24:61	1.6e-12	AFDDIAKCFSKKEWEKMKYSEKIIYVYMKRKYEAMTKL	1/1:24:61	1.1e-23	AFDDIAKCFSKKEWEKMKYSEKIIYVYMKRKYEAMTKL	1/1:24:61	8.8e-09	AFDDIAKCFSKKEWEKMKYSEKIIYVYMKRKYEAMTKL	1/1:24:61	6.7e-23	AFDDIAKCFSKKEWEKMKYSEKIIYVYMKRKYEAMTKL
268	SSX ortho/para		A0A2K5NFB2	caty	Cercocebus atys	Sooty mangabey	Primates	105590483 [Gene Symbol: LOC105590483] [Locus Tag: ] [Chromosome: Un] [Map Location: ] [Description: protein SSX2] [Gene Type: protein-coding]	MNGDDAFARRPRVGAQIPEKIQKAFDDIAKYFPKKEWEKMKTSEKIIYVYMKRKYEVMTKLGFKATLPPFMRNTVAEDFQGNDSDNDRNREDQVERPQMTFGKLQRIIPKIMPEKPAEEGNDSKEVPGASGPQNDGKQLCPPGKPSTSKKINKRSGPKRGKHAWTHRLRERKQLVIYEEISDPEEDDE				PF09514 [SSXRD]			1/1:22:61	6.6e-06	QKAFDDIAKYFPKKEWEKMKTSEKIIYVYMKRKYEVMTKL	1/1:24:61	2.9e-15	AFDDIAKYFPKKEWEKMKTSEKIIYVYMKRKYEVMTKL	1/1:24:61	2e-23	AFDDIAKYFPKKEWEKMKTSEKIIYVYMKRKYEVMTKL	1/1:24:61	4e-10	AFDDIAKYFPKKEWEKMKTSEKIIYVYMKRKYEVMTKL	1/1:24:61	4e-23	AFDDIAKYFPKKEWEKMKTSEKIIYVYMKRKYEVMTKL
269	SSX ortho/para		A0A2K5MVQ5	caty	Cercocebus atys	Sooty mangabey	Primates	105590485 [Gene Symbol: LOC105590485] [Locus Tag: ] [Chromosome: Un] [Map Location: ] [Description: protein SSX8-like] [Gene Type: protein-coding]	MNGDNAFAKRPRDNAKTSKKRSKAFDDIAKYFSKKEWEKMKYSEKISYVYMKRNYEAMTKLGFNVTLPPFMHNKQATDFQENDSDNDRNHRNQVECPQMTFGKLQRIIPKIIPKKPAEEGNDSKGVPEASDPQNDGKQLCPPGKANTSEKINKRSGPKKGKHAWTHRLRERKQLVIYEEISDPEEDDE				PF09514 [SSXRD]			1/1:22:61	1.2e-06	SKAFDDIAKYFSKKEWEKMKYSEKISYVYMKRNYEAMTKL	1/1:24:61	3.7e-17	AFDDIAKYFSKKEWEKMKYSEKISYVYMKRNYEAMTKL	1/1:24:61	1.3e-24	AFDDIAKYFSKKEWEKMKYSEKISYVYMKRNYEAMTKL	1/1:24:61	5.7e-09	AFDDIAKYFSKKEWEKMKYSEKISYVYMKRNYEAMTKL	1/1:24:61	9.9e-25	AFDDIAKYFSKKEWEKMKYSEKISYVYMKRNYEAMTKL
270	SSX ortho/para		A0A2K5M944	caty	Cercocebus atys	Sooty mangabey	Primates	KRAB-related domain-containing protein; SSX5 according to ENSEMBL	MSGDDASARRPRVGAQIPEKIQKAFDDIAKYFSKKEWERMKVSEKIVYVYKKRKYEAMSKLGFKVTLPPFMRNKRATDFQGNDSDNDPNHGNQEMSLILFICDLHIIKIMPEKPAEEGNDAKGVPEASGPQNDVKQLSPPGKPSTSEKINKTSGPKRGKHAWTHRLRERKHPVIYEEISDPEEDDE				PF09514 [SSXRD]			1/1:22:61	2.5e-05	QKAFDDIAKYFSKKEWERMKVSEKIVYVYKKRKYEAMSKL	1/1:24:61	3.7e-13	AFDDIAKYFSKKEWERMKVSEKIVYVYKKRKYEAMSKL	1/1:24:61	1.4e-21	AFDDIAKYFSKKEWERMKVSEKIVYVYKKRKYEAMSKL	1/1:24:61	5.9e-09	AFDDIAKYFSKKEWERMKVSEKIVYVYKKRKYEAMSKL	1/1:24:61	6.7e-22	AFDDIAKYFSKKEWERMKVSEKIVYVYKKRKYEAMSKL
271	SSX ortho/para		A0A2K5KMY1	caty	Cercocebus atys	Sooty mangabey	Primates	KRAB-related domain-containing protein; SSX11-like according to ENSEMBL	MNRDEDCAKRARDDAQTPEKIQKAFDDIAKYFSKKEWKKMKTSEKIIYVYMKRKYEVTLLPFMRNKRATDFQGNDSDNDCNRGNQVERPQMTSGRLQGIFPKIMPKKSAEEGNDWKGVPEASGPQNHGKQLCPPGKPNTSEKINKRSGPKREKHAWTHRLRERKQLVIYEEISDPEEDEEYLHK				PF09514 [SSXRD]			1/1:22:60	1.4e-05	QKAFDDIAKYFSKKEWKKMKTSEKIIYVYMKRKYEVTLL	1/1:24:61	8.2e-12	AFDDIAKYFSKKEWKKMKTSEKIIYVYMKRKYEVTLLP	1/1:24:61	2.4e-20	AFDDIAKYFSKKEWKKMKTSEKIIYVYMKRKYEVTLLP	1/1:24:61	2e-09	AFDDIAKYFSKKEWKKMKTSEKIIYVYMKRKYEVTLLP	1/1:24:61	6.4e-20	AFDDIAKYFSKKEWKKMKTSEKIIYVYMKRKYEVTLLP
272	SSX ortho/para		A0A2K5MZW3	caty	Cercocebus atys	Sooty mangabey	Primates	105590486 [Gene Symbol: LOC105590486] [Locus Tag: ] [Chromosome: Un] [Map Location: ] [Description: putative protein SSX6] [Gene Type: protein-coding]	MNRDNAFAKRPRDDAKTSEKRSMAFVGIAKYFSKKEWEKMKYSEKINCVHMKRKYEAMTKLGFNATLPPFMRNKRATDFQGNDIDNDRNRRNEVGRPQMTFGKLQGIIPKRMLKKPAEEGNDSKGVPEASGPQNDGKQLCPPGKANTSEKINKRSGPKMGKHAWTHRLRERKQLVIYEEISDPEEDDE				PF09514 [SSXRD]			1/1:22:61	9e-05	SMAFVGIAKYFSKKEWEKMKYSEKINCVHMKRKYEAMTKL	1/1:24:61	9.1e-14	AFVGIAKYFSKKEWEKMKYSEKINCVHMKRKYEAMTKL	1/1:24:61	6.6e-22	AFVGIAKYFSKKEWEKMKYSEKINCVHMKRKYEAMTKL	1/1:24:61	6.1e-07	AFVGIAKYFSKKEWEKMKYSEKINCVHMKRKYEAMTKL	1/1:24:61	4.1e-21	AFVGIAKYFSKKEWEKMKYSEKINCVHMKRKYEAMTKL
273	SSX ortho/para		A0A2K5NV92	caty	Cercocebus atys	Sooty mangabey	Primates	105590482 [Gene Symbol: LOC105590482] [Locus Tag: ] [Chromosome: Un] [Map Location: ] [Description: protein SSX5-like] [Gene Type: protein-coding]	MNRDEDCAKRARDDAQTPEKIQKPFDDIAKYFSEKEWEKMKYSEKIIYVYMKRKYEAMTKLGFKVTHPPFMRNKRATDFQGNDSDNDCNCGNQVECPQMTFGKLQGIFLKIMPKKPAEEGNDSKGVPEASGPQNDGKQLCSSGKPSTSEKINATSGPKRGKHAWTHRLRERKQLVIYEEISDAEEDEE				PF09514 [SSXRD]			1/1:22:61	4e-06	QKPFDDIAKYFSEKEWEKMKYSEKIIYVYMKRKYEAMTKL	1/1:24:61	6.2e-13	PFDDIAKYFSEKEWEKMKYSEKIIYVYMKRKYEAMTKL	1/1:24:61	8.3e-24	PFDDIAKYFSEKEWEKMKYSEKIIYVYMKRKYEAMTKL	1/1:24:61	6.3e-09	PFDDIAKYFSEKEWEKMKYSEKIIYVYMKRKYEAMTKL	1/1:24:61	1.1e-22	PFDDIAKYFSEKEWEKMKYSEKIIYVYMKRKYEAMTKL
274	SSX ortho/para		A0A2K5LM07	caty	Cercocebus atys	Sooty mangabey	Primates	KRAB-related domain-containing protein; Putative protein SSX6 according to ENSEMBL	MNRDNAFAKRPRDDANTSEKRSKAFDAIAKYFSKKEWEKMKYSEKISCVHMKRKYEAMTKLGFNVTLPPFMRNKQATDFQGNDSDNDRNCGNQVERPQTTFGRFQRIFPKIMLKKPAEEGNDSKGVPEASGPQNDGKQPCPPGKPSTSEKINKTSGKRKQFGNNPSGFPGYVQVCGLGVCY							1/1:22:61	0.00019	SKAFDAIAKYFSKKEWEKMKYSEKISCVHMKRKYEAMTKL	1/1:24:61	7.7e-15	AFDAIAKYFSKKEWEKMKYSEKISCVHMKRKYEAMTKL	1/1:24:61	1.1e-22	AFDAIAKYFSKKEWEKMKYSEKISCVHMKRKYEAMTKL	1/1:24:61	1.8e-07	AFDAIAKYFSKKEWEKMKYSEKISCVHMKRKYEAMTKL	1/1:24:61	5.3e-22	AFDAIAKYFSKKEWEKMKYSEKISCVHMKRKYEAMTKL
275	SSX ortho/para		A0A2K5MR44	caty	Cercocebus atys	Sooty mangabey	Primates	KRAB-related domain-containing protein	MNGDNTFARRPRDDAQISEKIQKKEWEKMKAPEKIFFVYMKINYEVMTNFFNRNKRAADFHGFFFDNDRNRGNQEMSLILFICFFYIIKIMPKKPAEIFFDSKQVAEASGPRNGGKQLWPPRKPSTSEKINKRSGPKKGKHAWTHFFCERKQPVISEEIFFSEEDDE										1/1:13:50	0.00023	DDAQISEKIQKKEWEKMKAPEKIFFVYMKINYEVMTNF	1/1:13:50	8.1e-16	DDAQISEKIQKKEWEKMKAPEKIFFVYMKINYEVMTNF	1/1:13:50	0.0015	DDAQISEKIQKKEWEKMKAPEKIFFVYMKINYEVMTNF	1/1:13:50	4e-13	DDAQISEKIQKKEWEKMKAPEKIFFVYMKINYEVMTNF
276	SSX ortho/para		A0A0D9RLN3	csab	Chlorocebus sabaeus	Green monkey	Primates	103231914 [Gene Symbol: LOC103231914] [Locus Tag: ] [Chromosome: X] [Map Location: ] [Description: protein SSX8-like] [Gene Type: protein-coding]	MNGDNAFAKRPRDNAKTSKKRSKAFDDIAKYFSKKEWEKMNYSEKISYVYMKRNYEAMTKLGFNVTLPPFMRNKQATDFQGNDSDNDRNHRNQGERPQMTFGKLQRIIPKIIPKKPAEEGNDSKGVPEASDPQNNGKQLCPPGKPNTSEKINKRSGPKRGKHAWTHRLRERKQLVVYEEISDPEEDNE			PF01352 [KRAB]	PF09514 [SSXRD]			1/1:22:61	1.1e-06	SKAFDDIAKYFSKKEWEKMNYSEKISYVYMKRNYEAMTKL	1/1:24:61	4.8e-17	AFDDIAKYFSKKEWEKMNYSEKISYVYMKRNYEAMTKL	1/1:24:61	1.8e-24	AFDDIAKYFSKKEWEKMNYSEKISYVYMKRNYEAMTKL	1/1:24:61	5.9e-09	AFDDIAKYFSKKEWEKMNYSEKISYVYMKRNYEAMTKL	1/1:24:61	1.8e-24	AFDDIAKYFSKKEWEKMNYSEKISYVYMKRNYEAMTKL
277	SSX ortho/para		A0A0D9RLG5	csab	Chlorocebus sabaeus	Green monkey	Primates	KRAB-related domain-containing protein; SSX3 according to ENSEMBL	MNGDDAFARRPRVGAQIPEKIQKHPWRQVCDHALHLVTVSPFWKVRREPASSIKALLCGRGEARAFDDIAKYFSKKEWERMKVSEKIVYVYKKRKYEAMSKLGFKVTLPPFMRNKRATDFQGNDSDNDPNHGNQVERPQMTSGRLKGVFPKIMPEKPAEEGNDSKGVPEASGPQNDEKQLCPPGIPSTSEKINKRSGPKRGKHAWTHRLRERKQPVIYEEISDPEEDDE				PF09514 [SSXRD]			1/1:63:102	2.3e-05	ARAFDDIAKYFSKKEWERMKVSEKIVYVYKKRKYEAMSKL	1/1:65:102	3.7e-13	AFDDIAKYFSKKEWERMKVSEKIVYVYKKRKYEAMSKL	1/1:65:102	1.4e-21	AFDDIAKYFSKKEWERMKVSEKIVYVYKKRKYEAMSKL	1/1:65:102	5.9e-09	AFDDIAKYFSKKEWERMKVSEKIVYVYKKRKYEAMSKL	1/1:65:102	6.7e-22	AFDDIAKYFSKKEWERMKVSEKIVYVYKKRKYEAMSKL
278	SSX ortho/para		A0A0D9RLK0	csab	Chlorocebus sabaeus	Green monkey	Primates	103231918 [Gene Symbol: LOC103231918] [Locus Tag: ] [Chromosome: X] [Map Location: ] [Description: protein SSX4-like] [Gene Type: protein-coding]	MNGDNTFARRPRDDAQISEKIQKAFDDTAKYFSKKEWEKMKASEKIIYVYMKINYEVMTKLGFKVTLPPFMCSKRAADFHGNDFDNDRNRGNQVEHPQMTFSRLQRIFPKIMPKKPAEEGNDSKQVAEASGPRNGGKQLCPPRKPSTSEKINKRSGPKRGKHTWTHRLRERKQPVIYEEISDPEEDDE				PF09514 [SSXRD]			1/1:22:61	1.5e-06	QKAFDDTAKYFSKKEWEKMKASEKIIYVYMKINYEVMTKL	1/1:24:61	1.4e-14	AFDDTAKYFSKKEWEKMKASEKIIYVYMKINYEVMTKL	1/1:24:61	1.9e-22	AFDDTAKYFSKKEWEKMKASEKIIYVYMKINYEVMTKL	1/1:24:61	1.1e-08	AFDDTAKYFSKKEWEKMKASEKIIYVYMKINYEVMTKL	1/1:24:61	6.8e-22	AFDDTAKYFSKKEWEKMKASEKIIYVYMKINYEVMTKL
279	SSX ortho/para		A0A0D9RM63	csab	Chlorocebus sabaeus	Green monkey	Primates	KRAB-related domain-containing protein	MNRDEDYAKRARDDAQTPEKIQKAFDDIAKYFSKKDWEKMKTSEKIIYVYMKRKYEAMTKLGFKVTLPPFMRNKRATDFQGNDSDNDCNRGNQVERPQMTFGRLQGIFPKIMLKKPAEEGNDSKGVPEASGPQNDGKQLCPPGKPNTSEKINKRSGNREAQEKEERQGRAHPWSSQTTHNIGSKRGKHAWTHRLHKRKQLVIYEEISDPEEDEE				PF09514 [SSXRD]			1/1:22:61	4.1e-06	QKAFDDIAKYFSKKDWEKMKTSEKIIYVYMKRKYEAMTKL	1/1:24:61	5.5e-15	AFDDIAKYFSKKDWEKMKTSEKIIYVYMKRKYEAMTKL	1/1:24:61	1.5e-23	AFDDIAKYFSKKDWEKMKTSEKIIYVYMKRKYEAMTKL	1/1:24:61	1.5e-09	AFDDIAKYFSKKDWEKMKTSEKIIYVYMKRKYEAMTKL	1/1:24:61	1.9e-22	AFDDIAKYFSKKDWEKMKTSEKIIYVYMKRKYEAMTKL
280	SSX ortho/para		A0A0D9RLS4	csab	Chlorocebus sabaeus	Green monkey	Primates	KRAB-related domain-containing protein	VNRDDACAKRPRDDAQIPEKIQKAFDDIAKYFSKKEWEKMKALEKIISVYMKRKYEAMTKLTTIQVTIPPPYIFMDNKLVSNFLTSGDPPTSASQIERPQMTFSRLQRIFPKIVPKKPAEEGNDSKGMSEASGPQNDGKQLCPPGKPSTSEKINKTPGVRTGCVAW							1/1:22:61	1.8e-05	QKAFDDIAKYFSKKEWEKMKALEKIISVYMKRKYEAMTKL	1/1:24:61	5.5e-14	AFDDIAKYFSKKEWEKMKALEKIISVYMKRKYEAMTKL	1/1:24:61	1.6e-22	AFDDIAKYFSKKEWEKMKALEKIISVYMKRKYEAMTKL	1/1:24:61	9e-09	AFDDIAKYFSKKEWEKMKALEKIISVYMKRKYEAMTKL	1/1:24:61	2e-21	AFDDIAKYFSKKEWEKMKALEKIISVYMKRKYEAMTKL
281	SSX ortho/para		A0A0D9RLZ1	csab	Chlorocebus sabaeus	Green monkey	Primates	KRAB-related domain-containing protein	MNGDEAFAKRPRYDAKNIREEKQGEHPWRQVCDRALHLVTLSPFWKMGREPASSIKALLCGRGEARAFDGIAKYFSNKEWEKMKASEKIIYVYMKRKYEAMTKLGFKVTFPTFMRNKGAVDFQGNDFDNDCNHRNQVERPQMTFGMLQGIFPKIMPKKPAEEGNDWKGVPEASGPQNNGQLCPPGKANTSEKINKTSGPKRGKHVWTHRLHERKQLVIYEEISDPEEDEE				PF09514 [SSXRD]			1/1:65:104	1.2e-05	ARAFDGIAKYFSNKEWEKMKASEKIIYVYMKRKYEAMTKL	1/1:67:104	1.4e-13	AFDGIAKYFSNKEWEKMKASEKIIYVYMKRKYEAMTKL	1/1:67:104	4.7e-23	AFDGIAKYFSNKEWEKMKASEKIIYVYMKRKYEAMTKL	1/1:67:104	5e-09	AFDGIAKYFSNKEWEKMKASEKIIYVYMKRKYEAMTKL	1/1:67:104	3.2e-22	AFDGIAKYFSNKEWEKMKASEKIIYVYMKRKYEAMTKL
282	SSX ortho/para		A0A0D9RLU0	csab	Chlorocebus sabaeus	Green monkey	Primates	KRAB-related domain-containing protein	MNRDNAFAKRPRDDAETSEKRSMAFNGITKYFSKKEWEKMKYSEKINCVHMKRKYEAMTKLGFNVTLPPFMRNKWATDFQGNINNDRNRRNEVERPQMTFGRLQRIIPKIMLKKPAEEGNDSKGVPEASGPQNDGKQLCPPGKANTSEKINKRSGPKRGKHAWTHRLRERKQLVIYEEISDPEEDDE				PF09514 [SSXRD]			1/1:22:61	0.00011	SMAFNGITKYFSKKEWEKMKYSEKINCVHMKRKYEAMTKL	1/1:24:61	8.7e-14	AFNGITKYFSKKEWEKMKYSEKINCVHMKRKYEAMTKL	1/1:24:61	5.5e-22	AFNGITKYFSKKEWEKMKYSEKINCVHMKRKYEAMTKL	1/1:24:61	2e-07	AFNGITKYFSKKEWEKMKYSEKINCVHMKRKYEAMTKL	1/1:24:61	6.6e-21	AFNGITKYFSKKEWEKMKYSEKINCVHMKRKYEAMTKL
283	SSX ortho/para		A0A0D9RLM1	csab	Chlorocebus sabaeus	Green monkey	Primates	KRAB-related domain-containing protein	MNGDDAFARRPRVGAQIPEKIRKPFDDIAKYFSKKEWEKMKYSEKIIYVYMKRKYEAMTKLGFKVTLPPFMRNKRATDFQGNDSDNDCNCGNQVECPQMTFGRLQGIFLKIMPKKPAEEGNDSKGMSEASGSQNDGKQLCPSGKPSTSEKINATSGNREAQEKEERPGTAHWWSSQNTHNIGPKMGKHAWTHRLRERKQPVIYEEISDPEEDEE				PF09514 [SSXRD]			1/1:22:61	5e-06	RKPFDDIAKYFSKKEWEKMKYSEKIIYVYMKRKYEAMTKL	1/1:24:61	6.3e-14	PFDDIAKYFSKKEWEKMKYSEKIIYVYMKRKYEAMTKL	1/1:24:61	4.7e-24	PFDDIAKYFSKKEWEKMKYSEKIIYVYMKRKYEAMTKL	1/1:24:61	1.8e-09	PFDDIAKYFSKKEWEKMKYSEKIIYVYMKRKYEAMTKL	1/1:24:61	1.7e-23	PFDDIAKYFSKKEWEKMKYSEKIIYVYMKRKYEAMTKL
284	SSX ortho/para		A0A0D9RLX4	csab	Chlorocebus sabaeus	Green monkey	Primates	KRAB-related domain-containing protein	TFDDIAKYFSKKEWEKMKCSERIIYVYMKRKYRGLSMLHFKVTLPHFMRNKRATDFQGNDFDNDRNHGNQVERPQMTFGMLQGLFPKIMHNKPAEEGNDSKGVPEASDPQNHGKQLCPPGKANTSEKINKRSGRRK			PF01352 [KRAB]				1/1:1:38	1.2e-06	TFDDIAKYFSKKEWEKMKCSERIIYVYMKRKYRGLSML	1/1:1:38	1.2e-10	TFDDIAKYFSKKEWEKMKCSERIIYVYMKRKYRGLSML	1/1:1:38	1.1e-20	TFDDIAKYFSKKEWEKMKCSERIIYVYMKRKYRGLSML	1/1:1:38	8.2e-09	TFDDIAKYFSKKEWEKMKCSERIIYVYMKRKYRGLSML	1/1:1:38	1.5e-19	TFDDIAKYFSKKEWEKMKCSERIIYVYMKRKYRGLSML
285	SSX ortho/para		A0A2K5IQD3	cang	Colobus angolensis palliatus	Peters' Angolan colobus	Primates	KRAB-related domain-containing protein; SSX5-like according to ENSEMBL	MNGDDAFARRPRVGAQIPEKIQKAFDDIAKYFSKKEWEKMKASEKIIYVYKKRKEAMTKLGFEVTLPPFMRNTVAADFQGNDSDNDRNRGDQVERPQMTFSRLQGIFPK							1/1:22:60	1.4e-05	QKAFDDIAKYFSKKEWEKMKASEKIIYVYKKRKEAMTKL	1/1:24:60	5.5e-10	AFDDIAKYFSKKEWEKMKASEKIIYVYKKRKEAMTKL	1/1:24:60	1.7e-19	AFDDIAKYFSKKEWEKMKASEKIIYVYKKRKEAMTKL	1/1:24:60	5.9e-06	AFDDIAKYFSKKEWEKMKASEKIIYVYKKRKEAMTKL	1/1:24:60	8.3e-18	AFDDIAKYFSKKEWEKMKASEKIIYVYKKRKEAMTKL
286	SSX ortho/para		A0A2K5I5V4	cang	Colobus angolensis palliatus	Peters' Angolan colobus	Primates	SSX1	MNGDNAFAKRPRDNAKTSKKRSKAFDDIAKYFSKKEWEKMTYSEKISYVYMKRNYETMTKLGFNVTLPPFMHNKQATDFQGNDSDNNRNRGNQVERPQMTFGKLQRIIPKIIPKKPAEEGNDSKGVPEASGPQNDGKQPCPPGKPSTSEKINKRSGPKRRKHAWTHRLRERKQRVIYEEISDPEEDDE			PF01352 [KRAB]	PF09514 [SSXRD]			1/1:22:61	1.2e-06	SKAFDDIAKYFSKKEWEKMTYSEKISYVYMKRNYETMTKL	1/1:24:61	4.6e-17	AFDDIAKYFSKKEWEKMTYSEKISYVYMKRNYETMTKL	1/1:24:61	1.3e-24	AFDDIAKYFSKKEWEKMTYSEKISYVYMKRNYETMTKL	1/1:24:61	4.7e-09	AFDDIAKYFSKKEWEKMTYSEKISYVYMKRNYETMTKL	1/1:24:61	9.6e-25	AFDDIAKYFSKKEWEKMTYSEKISYVYMKRNYETMTKL
287	SSX ortho/para		A0A2K5JRA9	cang	Colobus angolensis palliatus	Peters' Angolan colobus	Primates	105515025 [Gene Symbol: LOC105515025] [Locus Tag: ] [Chromosome: Un] [Map Location: ] [Description: protein SSX3] [Gene Type: protein-coding]	MDGDDAFARRPRVGAQIPEKIQKAFDDIAKYFSKKEWERMKVSEKIVYVYKKRKYEAMSKLGFKVILPPFMRNRRATDFQGNDFDNDPNHGNQVERPQMTSNRLQGVFPKIMPEKPAEEGNDSKRVPEASGPQNDVKQLCPPGKPSTSEKINKRSGNREAQEKEERWGTAHRWSSQNTCNIGRLRPKAGENVWTHRLRERKQRVIYEEISDPEEDDE				PF09514 [SSXRD]			1/1:22:61	2.5e-05	QKAFDDIAKYFSKKEWERMKVSEKIVYVYKKRKYEAMSKL	1/1:24:61	3.7e-13	AFDDIAKYFSKKEWERMKVSEKIVYVYKKRKYEAMSKL	1/1:24:61	1.4e-21	AFDDIAKYFSKKEWERMKVSEKIVYVYKKRKYEAMSKL	1/1:24:61	5.9e-09	AFDDIAKYFSKKEWERMKVSEKIVYVYKKRKYEAMSKL	1/1:24:61	6.7e-22	AFDDIAKYFSKKEWERMKVSEKIVYVYKKRKYEAMSKL
288	SSX ortho/para		A0A2K5I5V0	cang	Colobus angolensis palliatus	Peters' Angolan colobus	Primates	105515026 [Gene Symbol: LOC105515026] [Locus Tag: ] [Chromosome: Un] [Map Location: ] [Description: protein SSX4-like] [Gene Type: protein-coding]	MNGDYTFARRPRNDAQISEKIQKAFDDVAKYFSKKEWEKMKASEKIIYVYMKINYEVMTKLGFKVTLPPFMCSEPAADFHGNDFDNDRNRGNQVERPQMTSDRLQRIFPKIMPKKPAEKENDSKQVAEASSPRNGGKQLCPPGKPSTSEKINKTSGPKRQKHAWTHRLRERKQRVIYEEISDPEEDDE			PF01352 [KRAB]	PF09514 [SSXRD]			1/1:22:61	1.7e-07	QKAFDDVAKYFSKKEWEKMKASEKIIYVYMKINYEVMTKL	1/1:24:61	2.5e-15	AFDDVAKYFSKKEWEKMKASEKIIYVYMKINYEVMTKL	1/1:24:61	4.7e-23	AFDDVAKYFSKKEWEKMKASEKIIYVYMKINYEVMTKL	1/1:24:61	3e-09	AFDDVAKYFSKKEWEKMKASEKIIYVYMKINYEVMTKL	1/1:24:61	1.3e-22	AFDDVAKYFSKKEWEKMKASEKIIYVYMKINYEVMTKL
289	SSX ortho/para		A0A2K5IA98	cang	Colobus angolensis palliatus	Peters' Angolan colobus	Primates	KRAB-related domain-containing protein; SSX11-like according to ENSEMBL	MNGDDAFARRPRVGAQIPEKIQKPFDDIAKYFSKKEWEKMKASEKIIYVTLPPFMRNKRATDFQGNDSDNDRNCGNQVERPQMTFSMLQGIFPKIMPKKPAEEGNDSKGVAEASGPQNDGKQLCPPGKTKRKHAWTQRLRERKQLVIYEEISDPEEEDTELRLNDEIPHALSTPYPVYPGMLPTQDAVGSQTRGQP				PF09514 [SSXRD]			1/1:22:64	0.00012	QKPFDDIAKYFSKKEWEKMKASEKIIYVTLPPFMRNKRATDFQ	1/1:24:51	1.9e-05	PFDDIAKYFSKKEWEKMKASEKIIYVTL	1/1:24:61	2.1e-15	PFDDIAKYFSKKEWEKMKASEKIIYVTLPPFMRNKRAT	1/1:24:61	1.8e-05	PFDDIAKYFSKKEWEKMKASEKIIYVTLPPFMRNKRAT	1/1:24:61	1.3e-12	PFDDIAKYFSKKEWEKMKASEKIIYVTLPPFMRNKRAT
290	SSX ortho/para		A0A2K5JGA3	cang	Colobus angolensis palliatus	Peters' Angolan colobus	Primates	KRAB-related domain-containing protein	INRDDACAKRPRDDAQIPEKIQKMRQVCDLALHLVTLSPFWKVGRESASSIKALLCGRGEAFDDIPKYFYKKEWEKMKALEKIIYVYMKRKYEAMTKLSNRTLGTHEHPFFFERPQMTFSRLQGIFPKIVPKKPAEEGNDSKGMSEASGPQNDGKQLCPSGKRSTSEKINKTPGPKRGKHAWTHRLRERKQWVIYEEISDPEEVEE				PF09514 [SSXRD]			1/1:59:98	9.7e-05	GEAFDDIPKYFYKKEWEKMKALEKIIYVYMKRKYEAMTKL	1/1:61:98	4.4e-13	AFDDIPKYFYKKEWEKMKALEKIIYVYMKRKYEAMTKL	1/1:61:98	4.8e-22	AFDDIPKYFYKKEWEKMKALEKIIYVYMKRKYEAMTKL	1/1:61:98	1.7e-09	AFDDIPKYFYKKEWEKMKALEKIIYVYMKRKYEAMTKL	1/1:61:98	5.4e-21	AFDDIPKYFYKKEWEKMKALEKIIYVYMKRKYEAMTKL
291	SSX ortho/para		A0A2K5I7H4	cang	Colobus angolensis palliatus	Peters' Angolan colobus	Primates	KRAB-related domain-containing protein	MNSDDTFARRPNVGAQIPEKIQKAFDGIAKYFSKKEWEKMKYSEKIIYVYMKRKYEAMTKLGFRVTLPPFMRNKWVADFQRNDFDNDCNHGNQVERPQLSTFSKLQGIFPKIMPKKPAPAEEGNDSKGVSEASGPKNDGKQLCPLGKANASEKINKRSGKRKQFGNNPSGFPGYVQVWGMGILGPGWADEFAHFQMRC							1/1:22:61	1.3e-05	QKAFDGIAKYFSKKEWEKMKYSEKIIYVYMKRKYEAMTKL	1/1:24:61	1.5e-13	AFDGIAKYFSKKEWEKMKYSEKIIYVYMKRKYEAMTKL	1/1:24:61	1.4e-23	AFDGIAKYFSKKEWEKMKYSEKIIYVYMKRKYEAMTKL	1/1:24:61	5.5e-09	AFDGIAKYFSKKEWEKMKYSEKIIYVYMKRKYEAMTKL	1/1:24:61	5.9e-23	AFDGIAKYFSKKEWEKMKYSEKIIYVYMKRKYEAMTKL
292	SSX ortho/para		ENSGGOP00000010422	ggor	Gorilla gorilla gorilla	Western lowland gorilla	Primates	Uncharacterized protein	VNGDDAFVRRPRVGSQIPEKIQKHPWRKVCDRGVHLVNLSPFWKVGREPASSIKALLCGRGEARAFDDIAKYFSEKEWEKMKAWEKIIYVYMKRKYEAMTKLGFKATLPPFMCNKRVADFQGNDFDNDPNRGNQVEHPQMTFGRLQGIFPKIMPEKPAEEGNDSKGVPEASGPQNDGKQLRPSGKLNTSEKVNKTSGPKRGKHAWTHRLRERKQLVIYEEISDPQEDDK		IPR003655 [KRAB-related]	IPR001909 [KRAB]	IPR019041 [SSXRD]			1/1:63:102	1.4e-06	ARAFDDIAKYFSEKEWEKMKAWEKIIYVYMKRKYEAMTKL	1/1:65:102	5.2e-16	AFDDIAKYFSEKEWEKMKAWEKIIYVYMKRKYEAMTKL	1/1:65:102	1.4e-23	AFDDIAKYFSEKEWEKMKAWEKIIYVYMKRKYEAMTKL	1/1:65:102	5.7e-11	AFDDIAKYFSEKEWEKMKAWEKIIYVYMKRKYEAMTKL	1/1:65:102	1.6e-23	AFDDIAKYFSEKEWEKMKAWEKIIYVYMKRKYEAMTKL
293	SSX ortho/para		ENSGGOP00000018458	ggor	Gorilla gorilla gorilla	Western lowland gorilla	Primates	Uncharacterized protein	MNGDDTFARRPMVGAQIPEKIQKAFDDIAKYFSKEEWEKMKVSEKIVYVYMKRKYEAMTKLGFKAILPPFMRNKRVADFQGNDFDNDPNRGNQVERPQMTFGRLQGIFPKIMPKKPAEEGNDSKGVSEASGPQNHGKQLAPPGKANTSEKINKRSRPKRGEHAWTHRLRERKQLVIYEEISDPEEDDE		IPR003655 [KRAB-related]	IPR001909 [KRAB]	IPR019041 [SSXRD]			1/1:22:61	1.6e-06	QKAFDDIAKYFSKEEWEKMKVSEKIVYVYMKRKYEAMTKL	1/1:24:61	1.3e-15	AFDDIAKYFSKEEWEKMKVSEKIVYVYMKRKYEAMTKL	1/1:24:61	1e-23	AFDDIAKYFSKEEWEKMKVSEKIVYVYMKRKYEAMTKL	1/1:24:61	1.3e-10	AFDDIAKYFSKEEWEKMKVSEKIVYVYMKRKYEAMTKL	1/1:24:61	1.6e-24	AFDDIAKYFSKEEWEKMKVSEKIVYVYMKRKYEAMTKL
294	SSX ortho/para		ENSGGOP00000018916	ggor	Gorilla gorilla gorilla	Western lowland gorilla	Primates	Uncharacterized protein	MNGDDAFARRPRDDAQISEKLRKAFDDIAKYFSKKEWEKMKSSEKIIYVYMKLNYEVMTKLGFKVTLPPFMCSKRAADFHGNDFGNDRNHRNQVECPQMTFGRLQRIFPKIMPKKPAEEENDLKEVPEASGPQNDGKQLCPPGNPSTLEKINKTSGPKRGKHAWTHRLRERKQLVVYEEISDPEEDDE		IPR003655 [KRAB-related]	IPR001909 [KRAB]	IPR019041 [SSXRD]			1/1:22:61	6.4e-07	RKAFDDIAKYFSKKEWEKMKSSEKIIYVYMKLNYEVMTKL	1/1:24:61	5.4e-16	AFDDIAKYFSKKEWEKMKSSEKIIYVYMKLNYEVMTKL	1/1:24:61	2.9e-23	AFDDIAKYFSKKEWEKMKSSEKIIYVYMKLNYEVMTKL	1/1:24:61	8.5e-10	AFDDIAKYFSKKEWEKMKSSEKIIYVYMKLNYEVMTKL	1/1:24:61	4.4e-23	AFDDIAKYFSKKEWEKMKSSEKIIYVYMKLNYEVMTKL
295	SSX ortho/para		ENSP00000366122	hsap	Homo sapiens	Human	Primates	Protein SSX5; Synovial sarcoma, X breakpoint 5	MNGDDAFVRRPRVGSQIPEKMQKAFDDIAKYFSEKEWEKMKASEKIIYVYMKRKYEAMTKLGFKATLPPFMRNKRVADFQGNDFDNDPNRGNQVEHPQMTFGRLQGIFPKITPEKPAEEGNDSKGVPEASGPQNNGKQLRPSGKLNTSEKVNKTSGPKRGKHAWTHRVRERKQLVIYEEISDPQEDDE		IPR003655 [KRAB-related]	IPR001909 [KRAB]	IPR019041 [SSXRD]			1/1:22:61	1.6e-06	QKAFDDIAKYFSEKEWEKMKASEKIIYVYMKRKYEAMTKL	1/1:24:61	1.5e-14	AFDDIAKYFSEKEWEKMKASEKIIYVYMKRKYEAMTKL	1/1:24:61	6.5e-24	AFDDIAKYFSEKEWEKMKASEKIIYVYMKRKYEAMTKL	1/1:24:61	1.6e-09	AFDDIAKYFSEKEWEKMKASEKIIYVYMKRKYEAMTKL	1/1:24:61	6.6e-23	AFDDIAKYFSEKEWEKMKASEKIIYVYMKRKYEAMTKL
296	SSX ortho/para		ENSP00000477922	hsap	Homo sapiens	Human	Primates	SSX2B	MNGDDAFARRPTVGAQIPEKIQKAFDDIAKYFSKEEWEKMKASEKIFYVYMKRKYEAMTKLGFKATLPPFMCNKRAEDFQGNDLDNDPNRGNQVERPQMTFGRLQGISPKIMPKKPAEEGNDSEEVPEASGPQNDGKELCPPGKPTTSEKIHERSGNREAQEKEERRGTAHRWSSQNTHNIGPKRGEHAWTHRLRERKQLVIYEEISDPEEDDE			PF01352 [KRAB]	PF09514 [SSXRD]			1/1:22:61	1e-06	QKAFDDIAKYFSKEEWEKMKASEKIFYVYMKRKYEAMTKL	1/1:24:61	1.6e-15	AFDDIAKYFSKEEWEKMKASEKIFYVYMKRKYEAMTKL	1/1:24:61	8.2e-24	AFDDIAKYFSKEEWEKMKASEKIFYVYMKRKYEAMTKL	1/1:24:61	1.2e-09	AFDDIAKYFSKEEWEKMKASEKIFYVYMKRKYEAMTKL	1/1:24:61	2.5e-23	AFDDIAKYFSKEEWEKMKASEKIFYVYMKRKYEAMTKL
297	SSX ortho/para		ENSP00000338796	hsap	Homo sapiens	Human	Primates	SSX2	MNGDDAFARRPTVGAQIPEKIQKAFDDIAKYFSKEEWEKMKASEKIFYVYMKRKYEAMTKLGFKATLPPFMCNKRAEDFQGNDLDNDPNRGNQVERPQMTFGRLQGISPKIMPKKPAEEGNDSEEVPEASGPQNDGKELCPPGKPTTSEKIHERSGNREAQEKEERRGTAHRWSSQNTHNIGPKRGEHAWTHRLRERKQLVIYEEISDPEEDDE			PF01352 [KRAB]	PF09514 [SSXRD]			1/1:22:61	1e-06	QKAFDDIAKYFSKEEWEKMKASEKIFYVYMKRKYEAMTKL	1/1:24:61	1.6e-15	AFDDIAKYFSKEEWEKMKASEKIFYVYMKRKYEAMTKL	1/1:24:61	8.2e-24	AFDDIAKYFSKEEWEKMKASEKIFYVYMKRKYEAMTKL	1/1:24:61	1.2e-09	AFDDIAKYFSKEEWEKMKASEKIFYVYMKRKYEAMTKL	1/1:24:61	2.5e-23	AFDDIAKYFSKEEWEKMKASEKIFYVYMKRKYEAMTKL
298	SSX ortho/para		ENSP00000366131	hsap	Homo sapiens	Human	Primates	Putative protein SSX6	MNGDDAFAKRPRDDAKASEKRSKAFDDIAKYFSKEEWEKMKFSEKISCVHMKRKYEAMTKLGFNVTLSLFMRNKRATDSQRNDSDNDRNRGNEVERPQMTFGRLQRIIPKIMPEKPAEEGSDSKGVPEASGPQNDGKKLCPPGKASSSEKIHERSGPKRGKHAWTHRLRERKQLVIYEEISDPEEDDK		IPR003655 [KRAB-related]	IPR001909 [KRAB]	IPR019041 [SSXRD]			1/1:22:61	2.2e-05	SKAFDDIAKYFSKEEWEKMKFSEKISCVHMKRKYEAMTKL	1/1:24:61	1.7e-16	AFDDIAKYFSKEEWEKMKFSEKISCVHMKRKYEAMTKL	1/1:24:61	5.2e-23	AFDDIAKYFSKEEWEKMKFSEKISCVHMKRKYEAMTKL	1/1:24:61	2e-08	AFDDIAKYFSKEEWEKMKFSEKISCVHMKRKYEAMTKL	1/1:24:61	2.4e-22	AFDDIAKYFSKEEWEKMKFSEKISCVHMKRKYEAMTKL
299	SSX ortho/para		ENSP00000298396	hsap	Homo sapiens	Human	Primates	SSX3	MNGDDTFARRPTVGAQIPEKIQKAFDDIAKYFSKEEWEKMKVSEKIVYVYMKRKYEAMTKLGFKAILPSFMRNKRVTDFQGNDFDNDPNRGNQVQRPQMTFGRLQGIFPKIMPKKPAEEGNVSKEVPEASGPQNDGKQLCPPGKPTTSEKINMISGPKRGEHAWTHRLRERKQLVIYEEISDPEEDDE		IPR003655 [KRAB-related]	IPR001909 [KRAB]	IPR019041 [SSXRD]			1/1:22:61	1.6e-06	QKAFDDIAKYFSKEEWEKMKVSEKIVYVYMKRKYEAMTKL	1/1:24:61	1.3e-15	AFDDIAKYFSKEEWEKMKVSEKIVYVYMKRKYEAMTKL	1/1:24:61	1e-23	AFDDIAKYFSKEEWEKMKVSEKIVYVYMKRKYEAMTKL	1/1:24:61	1.3e-10	AFDDIAKYFSKEEWEKMKVSEKIVYVYMKRKYEAMTKL	1/1:24:61	1.6e-24	AFDDIAKYFSKEEWEKMKVSEKIVYVYMKRKYEAMTKL
300	SSX ortho/para		ENSP00000366107	hsap	Homo sapiens	Human	Primates	Protein SSX9	MNGDDAFARRPRAGSQIPEKIQKAFDDIAKYFSKKEWEKMKSSEKIIYVYMKRKYEAMTKLGFKATLPPFMCNTGATDLQGNDFDNDRNHRNQVERSQMTFGRLQGIFPKIMPKKPAEVGNDSKEVPEASGLQNDGKQLCPPGKPTTSEKINKASGPKRGKHAWTHRLRERKQLVIYEEISDPEEDDE		IPR003655 [KRAB-related]	IPR001909 [KRAB]	IPR019041 [SSXRD]			1/1:22:61	1.4e-06	QKAFDDIAKYFSKKEWEKMKSSEKIIYVYMKRKYEAMTKL	1/1:24:61	1.1e-15	AFDDIAKYFSKKEWEKMKSSEKIIYVYMKRKYEAMTKL	1/1:24:61	5.6e-24	AFDDIAKYFSKKEWEKMKSSEKIIYVYMKRKYEAMTKL	1/1:24:61	4.8e-10	AFDDIAKYFSKKEWEKMKSSEKIIYVYMKRKYEAMTKL	1/1:24:61	1.8e-23	AFDDIAKYFSKKEWEKMKSSEKIIYVYMKRKYEAMTKL
301	SSX ortho/para		ENSP00000469011	hsap	Homo sapiens	Human	Primates	Protein SSX4	MNGDDAFARRPRDDAQISEKLRKAFDDIAKYFSKKEWEKMKSSEKIVYVYMKLNYEVMTKLGFKVTLPPFMRSKRAADFHGNDFGNDRNHRNQVERPQMTFGSLQRIFPKIMPKKPAEEENGLKEVPEASGPQNDGKQLCPPGNPSTLEKINKTSGPKRGKHAWTHRLRERKQLVVYEEISDPEEDDE		IPR003655 [KRAB-related]	IPR001909 [KRAB]	IPR019041 [SSXRD]			1/1:22:61	7.9e-07	RKAFDDIAKYFSKKEWEKMKSSEKIVYVYMKLNYEVMTKL	1/1:24:61	5.5e-16	AFDDIAKYFSKKEWEKMKSSEKIVYVYMKLNYEVMTKL	1/1:24:61	4.3e-23	AFDDIAKYFSKKEWEKMKSSEKIVYVYMKLNYEVMTKL	1/1:24:61	2.3e-10	AFDDIAKYFSKKEWEKMKSSEKIVYVYMKLNYEVMTKL	1/1:24:61	6e-24	AFDDIAKYFSKKEWEKMKSSEKIVYVYMKLNYEVMTKL
302	SSX ortho/para		ENSP00000469394	hsap	Homo sapiens	Human	Primates	Protein SSX4B	MNGDDAFARRPRDDAQISEKLRKAFDDIAKYFSKKEWEKMKSSEKIVYVYMKLNYEVMTKLGFKVTLPPFMRSKRAADFHGNDFGNDRNHRNQVERPQMTFGSLQRIFPKIMPKKPAEEENGLKEVPEASGPQNDGKQLCPPGNPSTLEKINKTSGPKRGKHAWTHRLRERKQLVVYEEISDPEEDDE		IPR003655 [KRAB-related]	IPR001909 [KRAB]	IPR019041 [SSXRD]			1/1:22:61	7.9e-07	RKAFDDIAKYFSKKEWEKMKSSEKIVYVYMKLNYEVMTKL	1/1:24:61	5.5e-16	AFDDIAKYFSKKEWEKMKSSEKIVYVYMKLNYEVMTKL	1/1:24:61	4.3e-23	AFDDIAKYFSKKEWEKMKSSEKIVYVYMKLNYEVMTKL	1/1:24:61	2.3e-10	AFDDIAKYFSKKEWEKMKSSEKIVYVYMKLNYEVMTKL	1/1:24:61	6e-24	AFDDIAKYFSKKEWEKMKSSEKIVYVYMKLNYEVMTKL
303	SSX ortho/para		ENSP00000366118	hsap	Homo sapiens	Human	Primates	Protein SSX1	MNGDDTFAKRPRDDAKASEKRSKAFDDIATYFSKKEWKKMKYSEKISYVYMKRNYKAMTKLGFKVTLPPFMCNKQATDFQGNDFDNDHNRRIQVEHPQMTFGRLHRIIPKIMPKKPAEDENDSKGVSEASGPQNDGKQLHPPGKANISEKINKRSGPKRGKHAWTHRLRERKQLVIYEEISDPEEDDE		IPR003655 [KRAB-related]	IPR001909 [KRAB]	IPR019041 [SSXRD]			1/1:22:61	6.4e-07	SKAFDDIATYFSKKEWKKMKYSEKISYVYMKRNYKAMTKL	1/1:24:61	2.8e-16	AFDDIATYFSKKEWKKMKYSEKISYVYMKRNYKAMTKL	1/1:24:61	2.7e-23	AFDDIATYFSKKEWKKMKYSEKISYVYMKRNYKAMTKL	1/1:24:61	1.3e-08	AFDDIATYFSKKEWKKMKYSEKISYVYMKRNYKAMTKL	1/1:24:61	4.2e-23	AFDDIATYFSKKEWKKMKYSEKISYVYMKRNYKAMTKL
304	SSX ortho/para		Q7RTT4	hsap	Homo sapiens	Human	Primates	280659 [Gene Symbol: SSX8P] [Locus Tag: ] [Chromosome: X] [Map Location: Xp11.22] [Description: SSX family member 8, pseudogene] [Gene Type: pseudo]	MNGDDAFAKRPRDDDKASEKRSKAFNDIATYFSKKEWEKMKYSEKISYVYMKRNYEAMTKLGFNVTLPPFMCNKQATDFQGNYFDNDRNRRIQVERPQMTFGRLQRIIPKIMPKKPAEEGNDSKGVSEASGPQNDGKQLAPGKANTSEKINKRSGPKRGRHAWTHRLRERNQLVIYEEIRDPEEDDE			PF01352 [KRAB]	PF09514 [SSXRD]			1/1:22:61	6.2e-07	SKAFNDIATYFSKKEWEKMKYSEKISYVYMKRNYEAMTKL	1/1:24:61	3e-17	AFNDIATYFSKKEWEKMKYSEKISYVYMKRNYEAMTKL	1/1:24:61	4.4e-24	AFNDIATYFSKKEWEKMKYSEKISYVYMKRNYEAMTKL	1/1:24:61	3.1e-09	AFNDIATYFSKKEWEKMKYSEKISYVYMKRNYEAMTKL	1/1:24:61	2.2e-24	AFNDIATYFSKKEWEKMKYSEKISYVYMKRNYEAMTKL
305	SSX ortho/para		ENSP00000298181	hsap	Homo sapiens	Human	Primates	Protein SSX7	MNGDDAFARRPRAGAQIPEKIQKSFDDIAKYFSKKEWEKMKSLEKISYVYMKRKYEAMTKLGFKATLPPFMHNTGATDLQGNDFDNDRNQGNQVERPQMTFCRLQRIFPKIMPKKPAEEGNDSKGVPEASGSQNDGKHLCPPGKPSTSEKINKTSGPKRGKHAWTHRLRERKQLVIYEEISDPEEDDE		IPR003655 [KRAB-related]	IPR001909 [KRAB]	IPR019041 [SSXRD]			1/1:22:61	8.6e-06	QKSFDDIAKYFSKKEWEKMKSLEKISYVYMKRKYEAMTKL	1/1:24:61	1.6e-15	SFDDIAKYFSKKEWEKMKSLEKISYVYMKRKYEAMTKL	1/1:24:61	1.7e-22	SFDDIAKYFSKKEWEKMKSLEKISYVYMKRKYEAMTKL	1/1:24:61	1.3e-09	SFDDIAKYFSKKEWEKMKSLEKISYVYMKRKYEAMTKL	1/1:24:61	5.5e-22	SFDDIAKYFSKKEWEKMKSLEKISYVYMKRKYEAMTKL
306	SSX ortho/para		A0A2K5VTD8	mfas	Macaca fascicularis	Crab-eating macaque	Primates	KRAB-related domain-containing protein; SSX2-like according to ENSEMBL	MNSDDAFARRPNVGAQIPEKIQKAFDDIAKCFSKKEWEKMKYSQKIIYVYMKRKYEAMTKLGFRVTLPPFMHNKRATDFQRNDSDNDCNRGNQVERPQLSTFSMLQGIFPKIMPKKPAQAEEGNDLKGVSETSGPKNDGKQLCPPGKANTSEKTNKRSGPKRGKHAWTHRLCERKQLVIYEEISDPEEDDE				PF09514 [SSXRD]			1/1:22:61	1.2e-06	QKAFDDIAKCFSKKEWEKMKYSQKIIYVYMKRKYEAMTKL	1/1:24:61	2.6e-11	AFDDIAKCFSKKEWEKMKYSQKIIYVYMKRKYEAMTKL	1/1:24:61	1.9e-23	AFDDIAKCFSKKEWEKMKYSQKIIYVYMKRKYEAMTKL	1/1:24:61	3.6e-08	AFDDIAKCFSKKEWEKMKYSQKIIYVYMKRKYEAMTKL	1/1:24:61	2.6e-22	AFDDIAKCFSKKEWEKMKYSQKIIYVYMKRKYEAMTKL
307	SSX ortho/para		A0A2K5U6K4	mfas	Macaca fascicularis	Crab-eating macaque	Primates	KRAB-related domain-containing protein; SSX2-like according to ENSEMBL	MNGDDAFARRPRVGAQIPEKIQKAFDDIAKYFPKKEWEKMKTSEKIIYVYKKRKYEAMNKLGFKATLPPFMRNTVAADFQGNDSDNDCNRGNQVERPQMTFGRLQGIFPKIMPEKPAEEGNDSKEVPGPSGPQNDGKQPCPLGKPSTSKKINKRSGPKRGKHAWTHRLRERKQLVIYEEISDPEEDDE				PF09514 [SSXRD]			1/1:22:61	7.7e-05	QKAFDDIAKYFPKKEWEKMKTSEKIIYVYKKRKYEAMNKL	1/1:24:61	7.5e-13	AFDDIAKYFPKKEWEKMKTSEKIIYVYKKRKYEAMNKL	1/1:24:61	1.2e-21	AFDDIAKYFPKKEWEKMKTSEKIIYVYKKRKYEAMNKL	1/1:24:61	2.5e-08	AFDDIAKYFPKKEWEKMKTSEKIIYVYKKRKYEAMNKL	1/1:24:61	1.9e-20	AFDDIAKYFPKKEWEKMKTSEKIIYVYKKRKYEAMNKL
308	SSX ortho/para		A0A2K5WJW1	mfas	Macaca fascicularis	Crab-eating macaque	Primates	KRAB-related domain-containing protein; SSX3 according to ENSEMBL	MNRDEDCAKRARDDAQTPEKIQKAFDDIAKYFPKKEWEKMKTSEKIIYVYMKRKYEAMTKLDFKVTLPPFMRNKRATDFQGNDSDNDRNRGNQVERPQMTSGRLQGIFPKIMPKKPAEEGNYWKGVPEASGPQNHGKQLCPPGKPNTSEKINKRSGPKRGKHAWTHRLRERKQLVIYEEISDPEEDEE				PF09514 [SSXRD]			1/1:22:61	5.8e-06	QKAFDDIAKYFPKKEWEKMKTSEKIIYVYMKRKYEAMTKL	1/1:24:61	2.1e-15	AFDDIAKYFPKKEWEKMKTSEKIIYVYMKRKYEAMTKL	1/1:24:61	1.6e-23	AFDDIAKYFPKKEWEKMKTSEKIIYVYMKRKYEAMTKL	1/1:24:61	6.2e-10	AFDDIAKYFPKKEWEKMKTSEKIIYVYMKRKYEAMTKL	1/1:24:61	3.3e-23	AFDDIAKYFPKKEWEKMKTSEKIIYVYMKRKYEAMTKL
309	SSX ortho/para		A0A2K5TMY4	mfas	Macaca fascicularis	Crab-eating macaque	Primates	KRAB-related domain-containing protein; Putative protein SSX6 according to ENSEMBL	MNRDNAFAKRPRDDAKTSEKRSKAFDDIAKYFSKKEWEKMKYSEKISCVHMKRKYEAMTKLGFNVTLPPFMRNKQATDFQGNDSDNDRNCGNQVERPQTTFGRFQRIFPKIMLKKPAEEGNNSKGVPEASGPQNDGKQPCPPGKPSTSEKINKTSGPKRGKHAWTHRLRERKQLVIYEEISDPEEDDE				PF09514 [SSXRD]			1/1:22:61	2.8e-05	SKAFDDIAKYFSKKEWEKMKYSEKISCVHMKRKYEAMTKL	1/1:24:61	4.5e-16	AFDDIAKYFSKKEWEKMKYSEKISCVHMKRKYEAMTKL	1/1:24:61	1.3e-23	AFDDIAKYFSKKEWEKMKYSEKISCVHMKRKYEAMTKL	1/1:24:61	2.8e-08	AFDDIAKYFSKKEWEKMKYSEKISCVHMKRKYEAMTKL	1/1:24:61	4.5e-23	AFDDIAKYFSKKEWEKMKYSEKISCVHMKRKYEAMTKL
310	SSX ortho/para		A0A2K5V5P9	mfas	Macaca fascicularis	Crab-eating macaque	Primates	SSX1	MNGDNAFAKRPRDNAKTSKKRSKAFDDIAKYFSKKEWEKMKYSEKISYVYMKRNYEAMTKLGFNATLPPFMHNKQATDFQGNDSDNDRNHRNQVERPQMTFGKLQRIIPKIIPKKPAEEGNDSKGVPETSDPQNDGKQLCPPGNANTSEKINKRSGPKRGKHAWTHRLRERKQLVIYEEISDPEEDDE				PF09514 [SSXRD]			1/1:22:61	1.2e-06	SKAFDDIAKYFSKKEWEKMKYSEKISYVYMKRNYEAMTKL	1/1:24:61	3.7e-17	AFDDIAKYFSKKEWEKMKYSEKISYVYMKRNYEAMTKL	1/1:24:61	1.3e-24	AFDDIAKYFSKKEWEKMKYSEKISYVYMKRNYEAMTKL	1/1:24:61	5.7e-09	AFDDIAKYFSKKEWEKMKYSEKISYVYMKRNYEAMTKL	1/1:24:61	9.9e-25	AFDDIAKYFSKKEWEKMKYSEKISYVYMKRNYEAMTKL
311	SSX ortho/para		A0A2K5VLR8	mfas	Macaca fascicularis	Crab-eating macaque	Primates	102124177 [Gene Symbol: SSX3] [Locus Tag: ] [Chromosome: X] [Map Location: ] [Description: SSX family member 3] [Gene Type: protein-coding]	MNGDDAFARRPRVGAQIPEKIQKAFDDIAKYFSKKEWERMKVSEKIVYVYKKRKYEAMSKLGFKVTLPPFMRNKRATDFQGNDSDNDPNRGNQVEHPQMTSGRLQGIFPKIMPEKPAEEGNDSKGVPEASGPQNDVKQLCPPGKPSTSEKINKRSGPKRGKHAWTHRLRERKQLVIYEEISDPEEDDE				PF09514 [SSXRD]			1/1:22:61	2.5e-05	QKAFDDIAKYFSKKEWERMKVSEKIVYVYKKRKYEAMSKL	1/1:24:61	3.7e-13	AFDDIAKYFSKKEWERMKVSEKIVYVYKKRKYEAMSKL	1/1:24:61	1.4e-21	AFDDIAKYFSKKEWERMKVSEKIVYVYKKRKYEAMSKL	1/1:24:61	5.9e-09	AFDDIAKYFSKKEWERMKVSEKIVYVYKKRKYEAMSKL	1/1:24:61	6.7e-22	AFDDIAKYFSKKEWERMKVSEKIVYVYKKRKYEAMSKL
312	SSX ortho/para		A0A2K5VA07	mfas	Macaca fascicularis	Crab-eating macaque	Primates	KRAB-related domain-containing protein; SSX4-like according to ENSEMBL	MNGDNTFARRPRDDAQISEKIQKAFDDIAQYFSKKEWEKMKASEKIIYVYMKINYEVMTKLGFKVTLPPFMCSKRAADFHRNDFDNDRNRGNQVEHPQMTSGRLQGIFPKIMPKKPAEKENDSKQVAEASGPRNGGKQLCPPRKPSTSEKINKRSGPKRGKHAWTHRLRERKQPVIYEEISDPEEDDE			PF01352 [KRAB]	PF09514 [SSXRD]			1/1:22:61	6.2e-07	QKAFDDIAQYFSKKEWEKMKASEKIIYVYMKINYEVMTKL	1/1:24:61	1.3e-16	AFDDIAQYFSKKEWEKMKASEKIIYVYMKINYEVMTKL	1/1:24:61	1.8e-23	AFDDIAQYFSKKEWEKMKASEKIIYVYMKINYEVMTKL	1/1:24:61	1.3e-09	AFDDIAQYFSKKEWEKMKASEKIIYVYMKINYEVMTKL	1/1:24:61	2e-23	AFDDIAQYFSKKEWEKMKASEKIIYVYMKINYEVMTKL
313	SSX ortho/para		A0A2K5VV38	mfas	Macaca fascicularis	Crab-eating macaque	Primates	107126396 [Gene Symbol: LOC107126396] [Locus Tag: ] [Chromosome: X] [Map Location: ] [Description: putative protein SSX6] [Gene Type: protein-coding]	MNRDNAFAKRPRDDAKTSEKRSMAFVGITKYFSKKEWEKMKYSEKINCVHMKRKYEAMTKLGFNVTLPPFMRNKWATDFQGNDIDNDHNRRNEVGRPQMTFGKLQRIIPKIMLKKPAEEGHDSKGVPETSGPQNDGKQLCPPGKPNTSEKINKRSGPKRGKHAWTHRLRERKQLVIYEEISDPEEDDE				PF09514 [SSXRD]			1/1:22:61	0.00016	SMAFVGITKYFSKKEWEKMKYSEKINCVHMKRKYEAMTKL	1/1:24:61	2.1e-13	AFVGITKYFSKKEWEKMKYSEKINCVHMKRKYEAMTKL	1/1:24:61	2e-21	AFVGITKYFSKKEWEKMKYSEKINCVHMKRKYEAMTKL	1/1:24:61	6.2e-07	AFVGITKYFSKKEWEKMKYSEKINCVHMKRKYEAMTKL	1/1:24:61	2.3e-20	AFVGITKYFSKKEWEKMKYSEKINCVHMKRKYEAMTKL
314	SSX ortho/para		A0A2K5VMH6	mfas	Macaca fascicularis	Crab-eating macaque	Primates	KRAB-related domain-containing protein; SSX3-like according to ENSEMBL	INGDHAFARRPRVGAQIPEKIQKPFDDIAKYFSKKEWEKMKYSEKIICVYMKRKYEAMTKLGFKVTLPPFMRNKWATDFQGNDSDNDCNRGNQVECPQMTFGRLQGIFLKIMPKMPAEEGNNSKGMSEASGSQNNGKQLCPLGKPSTSEKINVTSGPKRGKHAWTHRLRERKQLVIYEEISDAEEDEE				PF09514 [SSXRD]			1/1:22:61	3.4e-05	QKPFDDIAKYFSKKEWEKMKYSEKIICVYMKRKYEAMTKL	1/1:24:61	1.6e-13	PFDDIAKYFSKKEWEKMKYSEKIICVYMKRKYEAMTKL	1/1:24:61	4.8e-24	PFDDIAKYFSKKEWEKMKYSEKIICVYMKRKYEAMTKL	1/1:24:61	3.1e-08	PFDDIAKYFSKKEWEKMKYSEKIICVYMKRKYEAMTKL	1/1:24:61	2.9e-23	PFDDIAKYFSKKEWEKMKYSEKIICVYMKRKYEAMTKL
315	SSX ortho/para		F6R729	mmul	Macaca mulatta	Rhesus macaque	Primates	709149 [Gene Symbol: LOC709149] [Locus Tag: ] [Chromosome: X] [Map Location: ] [Description: protein SSX2-like] [Gene Type: protein-coding]	MNSDDAFARRPNVGAQIPEKIQKAFDDIAKCFSKKEWEKMKYSQKIIYVYMKRKYEAMTKLGFRVTLPPFMHNKRATDFQRNDSDNDCNRGNQVERPQLSTFSMLQGIFPKIMPKKPAQAEEGNDLKGVSETSGPKNDGKQLCPPGKANTSEKTNKRSGPKRGKHAWTHRLCERKQLVIYEEISDPEEDDE							1/1:22:61	1.2e-06	QKAFDDIAKCFSKKEWEKMKYSQKIIYVYMKRKYEAMTKL	1/1:24:61	2.6e-11	AFDDIAKCFSKKEWEKMKYSQKIIYVYMKRKYEAMTKL	1/1:24:61	1.9e-23	AFDDIAKCFSKKEWEKMKYSQKIIYVYMKRKYEAMTKL	1/1:24:61	3.6e-08	AFDDIAKCFSKKEWEKMKYSQKIIYVYMKRKYEAMTKL	1/1:24:61	2.6e-22	AFDDIAKCFSKKEWEKMKYSQKIIYVYMKRKYEAMTKL
316	SSX ortho/para		F7H538	mmul	Macaca mulatta	Rhesus macaque	Primates	709251 [Gene Symbol: LOC709251] [Locus Tag: ] [Chromosome: X] [Map Location: ] [Description: putative protein SSX9] [Gene Type: protein-coding]	MNGDDAFARRPRVGAQIPEKIQKAFDDIAKYFPKKEWEKMKTSEKIIYVYKKRKYEAMNKLGFKATLPPFMRNKWATDFQGNDSDNDCNRGNQVERPQMTFGRLQGIFPKDPKGGNMPGPTDCVRESTTLRKMTSNSPQRYDTCR							1/1:22:61	7.7e-05	QKAFDDIAKYFPKKEWEKMKTSEKIIYVYKKRKYEAMNKL	1/1:24:61	7.5e-13	AFDDIAKYFPKKEWEKMKTSEKIIYVYKKRKYEAMNKL	1/1:24:61	1.2e-21	AFDDIAKYFPKKEWEKMKTSEKIIYVYKKRKYEAMNKL	1/1:24:61	2.5e-08	AFDDIAKYFPKKEWEKMKTSEKIIYVYKKRKYEAMNKL	1/1:24:61	1.9e-20	AFDDIAKYFPKKEWEKMKTSEKIIYVYKKRKYEAMNKL
317	SSX ortho/para		ENSMMUP00000013219	mmul	Macaca mulatta	Rhesus macaque	Primates	Uncharacterized protein	MNRDEDCAKRARDDAQTPEKIQKAFDDIAKYFPKKEWEKMKTSEKIIYVYMKRKYEAMTKLGKVTLPPFMRNKRATDFQGNDSDNDRNRGNQVERPQMTSGRLQGIFPKIMPKKPAEEGNYWKGVPEASGPQNHGKQLCPPGKPNTSEKINKRSGPKRGKHAWTHRLRERKQLVIYEEISDPEEDEE		IPR003655 [KRAB-related]	IPR001909 [KRAB]	IPR019041 [SSXRD]			1/1:22:61	5.8e-06	QKAFDDIAKYFPKKEWEKMKTSEKIIYVYMKRKYEAMTKL	1/1:24:61	2.1e-15	AFDDIAKYFPKKEWEKMKTSEKIIYVYMKRKYEAMTKL	1/1:24:61	1.6e-23	AFDDIAKYFPKKEWEKMKTSEKIIYVYMKRKYEAMTKL	1/1:24:61	6.2e-10	AFDDIAKYFPKKEWEKMKTSEKIIYVYMKRKYEAMTKL	1/1:24:61	3.3e-23	AFDDIAKYFPKKEWEKMKTSEKIIYVYMKRKYEAMTKL
318	SSX ortho/para		F7GMZ8	mmul	Macaca mulatta	Rhesus macaque	Primates	KRAB-related domain-containing protein, Putative protein SSX6 according to ENSEMBL	MNGDNAFAKRPRDNAKTSKKRSKAFDDIAKYFSKKEWEKMKYSEKISYVYMKRNYEAMTKLGFNVTLPPFMHNKQATDFQGNDSDNDRNHRNQVERPQMTFGKLQRIIPKIIPKKPAEEGNDSKGVPETSDPQNDGKQLCPPGNANTSEKINKRSGPKRGKHAWTHRLRERKQLVIYEEISDPEEDDE				PF09514 [SSXRD]			1/1:22:61	1.2e-06	SKAFDDIAKYFSKKEWEKMKYSEKISYVYMKRNYEAMTKL	1/1:24:61	3.7e-17	AFDDIAKYFSKKEWEKMKYSEKISYVYMKRNYEAMTKL	1/1:24:61	1.3e-24	AFDDIAKYFSKKEWEKMKYSEKISYVYMKRNYEAMTKL	1/1:24:61	5.7e-09	AFDDIAKYFSKKEWEKMKYSEKISYVYMKRNYEAMTKL	1/1:24:61	9.9e-25	AFDDIAKYFSKKEWEKMKYSEKISYVYMKRNYEAMTKL
319	SSX ortho/para		ENSMMUP00000015319	mmul	Macaca mulatta	Rhesus macaque	Primates	Uncharacterized protein	MNGDDAFARRPRVGAQIPEKIQKHPWRQVCDRALHLVTLTPFRKVGREPASSVKALLCGRGEARAFDDIAKYFSKKEWERMKVSEKIVYVYKKRKYEAMSKLGFKVTLPPFMRNKRATDFQGNDSDNDPNHGNQVEHPQMTSGRLQGIFPKIMPEKPAEEGNDSKGVPEASGPQNDVKQLCPPGKPSTSEKINKRSGPKTGKHAWTHRLRERKQLVIYEEISDPEEDDE		IPR003655 [KRAB-related]	IPR001909 [KRAB]	IPR019041 [SSXRD]			1/1:63:102	2.3e-05	ARAFDDIAKYFSKKEWERMKVSEKIVYVYKKRKYEAMSKL	1/1:65:102	3.7e-13	AFDDIAKYFSKKEWERMKVSEKIVYVYKKRKYEAMSKL	1/1:65:102	1.4e-21	AFDDIAKYFSKKEWERMKVSEKIVYVYKKRKYEAMSKL	1/1:65:102	5.9e-09	AFDDIAKYFSKKEWERMKVSEKIVYVYKKRKYEAMSKL	1/1:65:102	6.7e-22	AFDDIAKYFSKKEWERMKVSEKIVYVYKKRKYEAMSKL
320	SSX ortho/para		ENSMMUP00000010547	mmul	Macaca mulatta	Rhesus macaque	Primates	Uncharacterized protein	MNGDNTFARRPRDDAQISEKIQKHPWRQVCDLALHLVTLSPLWKVGRESASSIKALLCDRGEARAFDDIAQYFSKKEWEKMKASEKIIYVYMKINYEVMTKLGFKVTLPPFMCSKRAADFHRNDFDHDRNRGNQVEHPQMTSGRLQGIFPKIMPKKPAEKENDSKQVAEASGPRNGGKQLCPPRKPSTSEKINKRSGPKRGKHAWTHRLRERKQPVIYEEISDPEEDDE		IPR003655 [KRAB-related]	IPR001909 [KRAB]	IPR019041 [SSXRD]			1/1:63:102	5.8e-07	ARAFDDIAQYFSKKEWEKMKASEKIIYVYMKINYEVMTKL	1/1:65:102	1.3e-16	AFDDIAQYFSKKEWEKMKASEKIIYVYMKINYEVMTKL	1/1:65:102	1.8e-23	AFDDIAQYFSKKEWEKMKASEKIIYVYMKINYEVMTKL	1/1:65:102	1.3e-09	AFDDIAQYFSKKEWEKMKASEKIIYVYMKINYEVMTKL	1/1:65:102	2e-23	AFDDIAQYFSKKEWEKMKASEKIIYVYMKINYEVMTKL
321	SSX ortho/para		ENSMMUP00000007074	mmul	Macaca mulatta	Rhesus macaque	Primates	Uncharacterized protein	HPWRQVCDRALHLVTLSPFWKVGREPASSIKALLCGRGEAREDPPCSAFNDIAQYFSKKEWEKMKFSEKISYVYMKINYEAMTKLGFKVTLPPFVHNKRATDFQGNDFDNDHNGGNQVERPQMTFSKLQRILPKVNNEKLDKEDTWALGSSEASPFSKQRLTLSSLPNPHFPIFPIIGPKREKHTWTHRLRERKQPVIYEEISDPEEDDE		IPR003655 [KRAB-related]	IPR001909 [KRAB]	IPR019041 [SSXRD]			1/1:46:85	3.5e-06	CSAFNDIAQYFSKKEWEKMKFSEKISYVYMKINYEAMTKL	1/1:48:85	1.3e-15	AFNDIAQYFSKKEWEKMKFSEKISYVYMKINYEAMTKL	1/1:48:85	1.5e-22	AFNDIAQYFSKKEWEKMKFSEKISYVYMKINYEAMTKL	1/1:48:85	2.3e-08	AFNDIAQYFSKKEWEKMKFSEKISYVYMKINYEAMTKL	1/1:48:85	3.2e-22	AFNDIAQYFSKKEWEKMKFSEKISYVYMKINYEAMTKL
322	SSX ortho/para		F7CGI9	mmul	Macaca mulatta	Rhesus macaque	Primates	708657 [Gene Symbol: LOC708657] [Locus Tag: ] [Chromosome: X] [Map Location: ] [Description: putative protein SSX6] [Gene Type: protein-coding]	MNRDNAFAKRPRDDAKTSEKRSMAFVGITKYFSKKEWEKMKYSEKINCVHMKRKYEAMTKLGFNVTLPPFMRNKRATDFQGNDIDNDRNRRNEVGRPQMTFGKLRRIIPKIMLKKPAEEGHDSKGVPEASGPQNDGKQLCPPGKPNTSEKINKRSGPKRGKHAWTHRLRERKQLVIYEEISDPEEDDE				PF09514 [SSXRD]			1/1:22:61	0.00016	SMAFVGITKYFSKKEWEKMKYSEKINCVHMKRKYEAMTKL	1/1:24:61	2.1e-13	AFVGITKYFSKKEWEKMKYSEKINCVHMKRKYEAMTKL	1/1:24:61	2e-21	AFVGITKYFSKKEWEKMKYSEKINCVHMKRKYEAMTKL	1/1:24:61	6.2e-07	AFVGITKYFSKKEWEKMKYSEKINCVHMKRKYEAMTKL	1/1:24:61	2.3e-20	AFVGITKYFSKKEWEKMKYSEKINCVHMKRKYEAMTKL
323	SSX ortho/para		F6SS17	mmul	Macaca mulatta	Rhesus macaque	Primates	713973 [Gene Symbol: LOC713973] [Locus Tag: ] [Chromosome: X] [Map Location: ] [Description: protein SSX3-like] [Gene Type: protein-coding]	INGDDAFARRPRVGAQIPEKIQKPFNDIAQYFSKKEWEKMKYSEKIICVYMKRKYEAMTKLGFKVTLPPFMRNKWATDFQGNDSDNDCNRGNQVECPQMTFGRLQGIFLKIMPKMPAEEGNNSKGMSEASGSQNNGKQLCPLGKPSTSEKINVTSGPKRGKHAWTHRLRERKQLVIYEEISDAEEDEE				PF09514 [SSXRD]			1/1:22:61	3.5e-05	QKPFNDIAQYFSKKEWEKMKYSEKIICVYMKRKYEAMTKL	1/1:24:61	4.8e-14	PFNDIAQYFSKKEWEKMKYSEKIICVYMKRKYEAMTKL	1/1:24:61	1e-23	PFNDIAQYFSKKEWEKMKYSEKIICVYMKRKYEAMTKL	1/1:24:61	3.1e-08	PFNDIAQYFSKKEWEKMKYSEKIICVYMKRKYEAMTKL	1/1:24:61	3.7e-23	PFNDIAQYFSKKEWEKMKYSEKIICVYMKRKYEAMTKL
324	SSX ortho/para		F7HGT0	mmul	Macaca mulatta	Rhesus macaque	Primates	KRAB-related domain-containing protein	MNRDEDCAKRARDDAQTPEKIQKVTWRGQVCDLALHLVTLSPFWKVGREPASSIKALLCGRKEARAFDDIAKYFPKKEWEKMKTSEKIIYVYMKRKYEVTLPPFMRNKRATDFQGNDSDNDRNRGNQVERPQMTSGRLQGIFPKIMPKKPAEEGNYWKGVPEASGPQNHGKQLCPPGKPNTSEKINKRSGPKRGKHAWTHRLRERKQLVIYEEISDPEEDEE							1/1:64:101	6.9e-05	ARAFDDIAKYFPKKEWEKMKTSEKIIYVYMKRKYEVTL	1/1:66:103	6e-12	AFDDIAKYFPKKEWEKMKTSEKIIYVYMKRKYEVTLPP	1/1:66:103	9.4e-21	AFDDIAKYFPKKEWEKMKTSEKIIYVYMKRKYEVTLPP	1/1:66:103	1.7e-09	AFDDIAKYFPKKEWEKMKTSEKIIYVYMKRKYEVTLPP	1/1:66:103	9e-21	AFDDIAKYFPKKEWEKMKTSEKIIYVYMKRKYEVTLPP
325	SSX ortho/para		F7CGH4	mmul	Macaca mulatta	Rhesus macaque	Primates	KRAB-related domain-containing protein	MNRDNAFAKRPRDDAKTSEKRSKAFDDIAKYFSKKEWEKMKYSEKISCVHMKRKYEAMTKLGFNVTLPPFMRNKQATDFQGNDSDNDRNCGNQVERPQTTFGRFQRIFPKIMLKKPAEEGNNSKGVPEASGPQNDGKQPCPPGKPSTSEKINKTSGPKRGKHAWTHRLRERKQLISDPEEDDE							1/1:22:61	2.8e-05	SKAFDDIAKYFSKKEWEKMKYSEKISCVHMKRKYEAMTKL	1/1:24:61	4.5e-16	AFDDIAKYFSKKEWEKMKYSEKISCVHMKRKYEAMTKL	1/1:24:61	1.3e-23	AFDDIAKYFSKKEWEKMKYSEKISCVHMKRKYEAMTKL	1/1:24:61	2.8e-08	AFDDIAKYFSKKEWEKMKYSEKISCVHMKRKYEAMTKL	1/1:24:61	4.5e-23	AFDDIAKYFSKKEWEKMKYSEKISCVHMKRKYEAMTKL
326	SSX ortho/para		G7NR66	mmul	Macaca mulatta	Rhesus macaque	Primates	KRAB-related domain-containing protein	MNGDDAFARRPRVGAQIPEKIQKHPWRQVCDSALYLVTLIPFRKVGREPASSIKALLCGRGEARVFDDIAKYFPKKEWEKMKTSEKIIYVYKKRKYEAMNKLGFKATLPPFMRNTVAADFQGNDSDNDCNRRDQVERPQMTFGRFQGIFPKIVPKKPAEEGNDSKGMSEASGPQNDGKQLCPPGKPSTSEKINKTPGPKRGKHAWTHRLRERKQLVIYEEISDPEEDEE				PF09514 [SSXRD]			1/1:63:102	7.9e-05	ARVFDDIAKYFPKKEWEKMKTSEKIIYVYKKRKYEAMNKL	1/1:65:102	3.9e-12	VFDDIAKYFPKKEWEKMKTSEKIIYVYKKRKYEAMNKL	1/1:65:102	5.2e-21	VFDDIAKYFPKKEWEKMKTSEKIIYVYKKRKYEAMNKL	1/1:65:102	4.7e-08	VFDDIAKYFPKKEWEKMKTSEKIIYVYKKRKYEAMNKL	1/1:65:102	1.5e-19	VFDDIAKYFPKKEWEKMKTSEKIIYVYKKRKYEAMNKL
327	SSX ortho/para		A0A2K6CLU4	mnem	Macaca nemestrina	Pig-tailed macaque	Primates	KRAB-related domain-containing protein; SSX3-like according to ENSEMBL	MNSDDAFARRPNVGAQIPEKIQKAFDDIAKCFSKKEWEKMKYSQKIIYVYMKRKYEAMTKLGFRVLPPFMHNKRATDFQRNDSDNDCNRGNQVERPQLSTFSMLQGIFPKIMPKKPAQAEEGNDLKGVSETSGPKNDGKQLCPPGKANTSEKTNKRSGPKRGKHAWTHRLCERKQLVIYEEISDPEEDDE				PF09514 [SSXRD]			1/1:22:61	1.2e-06	QKAFDDIAKCFSKKEWEKMKYSQKIIYVYMKRKYEAMTKL	1/1:24:61	2.6e-11	AFDDIAKCFSKKEWEKMKYSQKIIYVYMKRKYEAMTKL	1/1:24:61	1.9e-23	AFDDIAKCFSKKEWEKMKYSQKIIYVYMKRKYEAMTKL	1/1:24:61	3.6e-08	AFDDIAKCFSKKEWEKMKYSQKIIYVYMKRKYEAMTKL	1/1:24:61	2.6e-22	AFDDIAKCFSKKEWEKMKYSQKIIYVYMKRKYEAMTKL
328	SSX ortho/para		A0A2K6E9F4	mnem	Macaca nemestrina	Pig-tailed macaque	Primates	105493883 [Gene Symbol: LOC105493883] [Locus Tag: ] [Chromosome: Un] [Map Location: ] [Description: protein SSX9-like] [Gene Type: protein-coding]	MNGDDAFARRPRVGAQIPEKIQKAFDDIAKYFPKKEWEKMKTSEKIIYVYKKRKYEAMNKLGFKATLPPFMRNTVAADFQGNDSDNDCNRRDQVERPQMTFGRLQGIFPKIMPEKPAEEGNDSKEVPGPSGPQNDGKQPCPLGKPSTSKKINKRSGNREAQEKEERWGTAHRWSSQNTHNIGPKRGKHAWTHRLRERKQLVIYEEISDPEEDDE				PF09514 [SSXRD]			1/1:22:61	7.7e-05	QKAFDDIAKYFPKKEWEKMKTSEKIIYVYKKRKYEAMNKL	1/1:24:61	7.5e-13	AFDDIAKYFPKKEWEKMKTSEKIIYVYKKRKYEAMNKL	1/1:24:61	1.2e-21	AFDDIAKYFPKKEWEKMKTSEKIIYVYKKRKYEAMNKL	1/1:24:61	2.5e-08	AFDDIAKYFPKKEWEKMKTSEKIIYVYKKRKYEAMNKL	1/1:24:61	1.9e-20	AFDDIAKYFPKKEWEKMKTSEKIIYVYKKRKYEAMNKL
329	SSX ortho/para		A0A2K6BN67	mnem	Macaca nemestrina	Pig-tailed macaque	Primates	KRAB-related domain-containing protein; SSX2-like according to ENSEMBL	MNRDEDCAKRARDDAQTPEKIQKVTWRGQVCDLALHLVTLSPFWKVGREPASSIKALLCGRKEARAFDDIAKYFPKKEWEKMKTSEKIIYVYMKRKYEVTLPPFMCNKRATDFQGNDSDNDCNRGNQVERPQMTSGRLQGIFPKIMPKKPAEEGNDWKGVPEASGPQNHGKQLCPPGKPNTSEKINKRSGPKRGKHAWTHRLRERKHLVIYEEISDPEEDEE				PF09514 [SSXRD]			1/1:64:101	6.9e-05	ARAFDDIAKYFPKKEWEKMKTSEKIIYVYMKRKYEVTL	1/1:66:103	6e-12	AFDDIAKYFPKKEWEKMKTSEKIIYVYMKRKYEVTLPP	1/1:66:103	9.4e-21	AFDDIAKYFPKKEWEKMKTSEKIIYVYMKRKYEVTLPP	1/1:66:103	1.7e-09	AFDDIAKYFPKKEWEKMKTSEKIIYVYMKRKYEVTLPP	1/1:66:103	9e-21	AFDDIAKYFPKKEWEKMKTSEKIIYVYMKRKYEVTLPP
330	SSX ortho/para		A0A2K6CLG5	mnem	Macaca nemestrina	Pig-tailed macaque	Primates	105493885 [Gene Symbol: LOC105493885] [Locus Tag: ] [Chromosome: Un] [Map Location: ] [Description: protein SSX8] [Gene Type: protein-coding]	MNGDNAFAKRPRDNAKTSKKRSKAFDDIAKYFSKKEWEKMKYSEKISYVYMKRNYEAMTKLGFNVTLPPFMHNKQATDFQGNDSDNDRNHRNQVERPQMTFGKLQRIIPKIIPKKPAEEGNDSKGVPETSDPQNDGKQLCPPGNANTSEKINKRSGPKRGKHAWTHRLRERKQLVIYEEISDPEEDDE				PF09514 [SSXRD]			1/1:22:61	1.2e-06	SKAFDDIAKYFSKKEWEKMKYSEKISYVYMKRNYEAMTKL	1/1:24:61	3.7e-17	AFDDIAKYFSKKEWEKMKYSEKISYVYMKRNYEAMTKL	1/1:24:61	1.3e-24	AFDDIAKYFSKKEWEKMKYSEKISYVYMKRNYEAMTKL	1/1:24:61	5.7e-09	AFDDIAKYFSKKEWEKMKYSEKISYVYMKRNYEAMTKL	1/1:24:61	9.9e-25	AFDDIAKYFSKKEWEKMKYSEKISYVYMKRNYEAMTKL
331	SSX ortho/para		A0A2K6CYU4	mnem	Macaca nemestrina	Pig-tailed macaque	Primates	KRAB-related domain-containing protein; SSX3 according to ENSEMBL	MNGDDAFARRPRVGAQIPEKIQKAFDDIAKYFSKKEWERMKVSEKIVYVYKKRKYEAMSKLGFKVTLPPFMRNKRATDFQGNDSDNDPNHGNQVEHPQMTSGRLQGIFPKIMPEKPAEEGNDSKGVPEASGPQNDVKQLCPPGKPSTSEKINKRSGPKRGKHAWTHRLRERKQLVIYEEISDPEEDDE				PF09514 [SSXRD]			1/1:22:61	2.5e-05	QKAFDDIAKYFSKKEWERMKVSEKIVYVYKKRKYEAMSKL	1/1:24:61	3.7e-13	AFDDIAKYFSKKEWERMKVSEKIVYVYKKRKYEAMSKL	1/1:24:61	1.4e-21	AFDDIAKYFSKKEWERMKVSEKIVYVYKKRKYEAMSKL	1/1:24:61	5.9e-09	AFDDIAKYFSKKEWERMKVSEKIVYVYKKRKYEAMSKL	1/1:24:61	6.7e-22	AFDDIAKYFSKKEWERMKVSEKIVYVYKKRKYEAMSKL
332	SSX ortho/para		A0A2K6DX41	mnem	Macaca nemestrina	Pig-tailed macaque	Primates	105493888 [Gene Symbol: LOC105493888] [Locus Tag: ] [Chromosome: Un] [Map Location: ] [Description: protein SSX4-like] [Gene Type: protein-coding]	MNGDNTFARRPRDDAQISEKIQKAFDDIAQYFSKKEWEKMKASEKIIYVYMKINYEVMTKLGFKVTLPPFMCSKRAADFHRNDFDNDRNRGNQVEHPQMTSGRLQGIFPKIMPKKPAEKENDSKQVAEASGPRNGGKQLCPPRKPSTSEKINKRSGPKRGKHAWTHRLRERKQPVIYEEISDPEEDDE			PF01352 [KRAB]	PF09514 [SSXRD]			1/1:22:61	6.2e-07	QKAFDDIAQYFSKKEWEKMKASEKIIYVYMKINYEVMTKL	1/1:24:61	1.3e-16	AFDDIAQYFSKKEWEKMKASEKIIYVYMKINYEVMTKL	1/1:24:61	1.8e-23	AFDDIAQYFSKKEWEKMKASEKIIYVYMKINYEVMTKL	1/1:24:61	1.3e-09	AFDDIAQYFSKKEWEKMKASEKIIYVYMKINYEVMTKL	1/1:24:61	2e-23	AFDDIAQYFSKKEWEKMKASEKIIYVYMKINYEVMTKL
333	SSX ortho/para		A0A2K6E7H7	mnem	Macaca nemestrina	Pig-tailed macaque	Primates	KRAB-related domain-containing protein	VAQGTVWGDQVSEEGRTEILGAFNDIAQYFSKKEWEKMKFSEKIIYVYMKINYEAMTKLDFKVTLPPFMHNKRATDFQGNDFDNDHNGGNQVERPQMTFSKLQRILPKVNVSQILRAREPLSLHGCKHCLPNPHFPIFPIIGPKRGKHTWTHRLRERKQLVIYEEISDPEEDDE				PF09514 [SSXRD]			1/1:20:59	9.9e-07	LGAFNDIAQYFSKKEWEKMKFSEKIIYVYMKINYEAMTKL	1/1:22:59	2.6e-15	AFNDIAQYFSKKEWEKMKFSEKIIYVYMKINYEAMTKL	1/1:22:59	7.5e-23	AFNDIAQYFSKKEWEKMKFSEKIIYVYMKINYEAMTKL	1/1:22:59	6.3e-09	AFNDIAQYFSKKEWEKMKFSEKIIYVYMKINYEAMTKL	1/1:22:59	2.3e-22	AFNDIAQYFSKKEWEKMKFSEKIIYVYMKINYEAMTKL
334	SSX ortho/para		A0A2K6B2L2	mnem	Macaca nemestrina	Pig-tailed macaque	Primates	KRAB-related domain-containing protein	INGDDAFARRPRVGAQIPEKIQKPFDDIAKYFSKKEWEKMKYSEKIICVYMKRKYEAMTKLGFKVTLPPFMRNKWATDFQGNDSDNDCNRGNQVECPQMTFGRLQGIFLKIMPKMPAEEGNDSKGMSEASGSQNNGKQLCPLGKPSTSEKINAASGPKRGKHAWTHRLRERKQLVIYEEISDAEEDEE				PF09514 [SSXRD]			1/1:22:61	3.4e-05	QKPFDDIAKYFSKKEWEKMKYSEKIICVYMKRKYEAMTKL	1/1:24:61	1.6e-13	PFDDIAKYFSKKEWEKMKYSEKIICVYMKRKYEAMTKL	1/1:24:61	4.8e-24	PFDDIAKYFSKKEWEKMKYSEKIICVYMKRKYEAMTKL	1/1:24:61	3.1e-08	PFDDIAKYFSKKEWEKMKYSEKIICVYMKRKYEAMTKL	1/1:24:61	2.9e-23	PFDDIAKYFSKKEWEKMKYSEKIICVYMKRKYEAMTKL
335	SSX ortho/para		A0A2K6APA1	mnem	Macaca nemestrina	Pig-tailed macaque	Primates	KRAB-related domain-containing protein	MNGDDAFARRPRVASKMPEKIRKKEWEKMKASEKIIYVYMKRKYEAMTKLGFKVTLPPFVHNKRAADFQGNDSDNGCNRGNQVERPQMTFGRLQGIFLKIMLKKPAEEGNDSKEVPEASGNREAQKKEERQGTAHWWSSQNTHNIGPKRGKHAWTHRLRERKQLVIYEEISDAEEDDE				PF09514 [SSXRD]						1/1:17:50	0.00015	MPEKIRKKEWEKMKASEKIIYVYMKRKYEAMTKL	1/1:13:50	7.6e-17	VASKMPEKIRKKEWEKMKASEKIIYVYMKRKYEAMTKL	1/1:13:50	0.00015	VASKMPEKIRKKEWEKMKASEKIIYVYMKRKYEAMTKL	1/1:13:50	5.2e-13	VASKMPEKIRKKEWEKMKASEKIIYVYMKRKYEAMTKL
336	SSX ortho/para		A0A2K6AFL9	mleu	Mandrillus leucophaeus	Drill	Primates	105547735 [Gene Symbol: LOC105547735] [Locus Tag: ] [Chromosome: Un] [Map Location: ] [Description: protein SSX2-like] [Gene Type: protein-coding]	MNGDDAFARRPRVGAQIPEKIQKAFDDIAKYFPKKEWEKMKTSEKIIYVYMKRKYEVMTKLGFKATLPPFMRNTVAEDFQGNDSDNDRNRGDQVERPQMTSGRLQGIFPKIMPEKPAEEGNDSKEVPGASGPQNDGKQPCPPGKPSTFKKINKRSGPKRGKHAWTHRLRERKQLVIYEEISNPEEDDE				PF09514 [SSXRD]			1/1:22:61	6.6e-06	QKAFDDIAKYFPKKEWEKMKTSEKIIYVYMKRKYEVMTKL	1/1:24:61	2.9e-15	AFDDIAKYFPKKEWEKMKTSEKIIYVYMKRKYEVMTKL	1/1:24:61	2e-23	AFDDIAKYFPKKEWEKMKTSEKIIYVYMKRKYEVMTKL	1/1:24:61	4e-10	AFDDIAKYFPKKEWEKMKTSEKIIYVYMKRKYEVMTKL	1/1:24:61	4e-23	AFDDIAKYFPKKEWEKMKTSEKIIYVYMKRKYEVMTKL
337	SSX ortho/para		A0A2K5YI17	mleu	Mandrillus leucophaeus	Drill	Primates	KRAB-related domain-containing protein; SSX11-like according to ENSEMBL	IPEKAFDDIAKYFSKKDWEKMKTSEKIIYVYKKRKYEVTLPPFMRNKRATDFQGNDSDNDCNRGNQVERPQMTSGRLQGIFLKIMPKKLAEEGNDWKGVPEASGPQNHGKQLCPPEKPNTSEKINKRSGNREAQEKEERQGRAHPWSSQNTHNIHLLRPKRGKHTWTHTLRERKQLVIYEEISDPEEDEEYLHK				PF09514 [SSXRD]			1/1:3:40	0.00023	EKAFDDIAKYFSKKDWEKMKTSEKIIYVYKKRKYEVTL	1/1:5:42	1.6e-10	AFDDIAKYFSKKDWEKMKTSEKIIYVYKKRKYEVTLPP	1/1:5:42	1.5e-19	AFDDIAKYFSKKDWEKMKTSEKIIYVYKKRKYEVTLPP	1/1:5:42	3.7e-08	AFDDIAKYFSKKDWEKMKTSEKIIYVYKKRKYEVTLPP	1/1:5:42	1.5e-18	AFDDIAKYFSKKDWEKMKTSEKIIYVYKKRKYEVTLPP
338	SSX ortho/para		A0A2K5ZQM2	mleu	Mandrillus leucophaeus	Drill	Primates	105547741 [Gene Symbol: LOC105547741] [Locus Tag: ] [Chromosome: Un] [Map Location: ] [Description: protein SSX8] [Gene Type: protein-coding]	MNGDNAFAKRPRDNAKTSKKRSKAFDDIAKYFSKKEWEKMKYSEKISYVYMKRNYEAMTKLGFNVTLPPFMHNKQATDFQGNDSDNDRNHRNQVERPQMTFGKLQRIIPKIIPKKPAEEGNDSKGVPEASDPQNDGKQLCPPGKANTSEKINKRSGPKRGKHAWTHRLRERKQLVIYEEISDPEEDDE				PF09514 [SSXRD]			1/1:22:61	1.2e-06	SKAFDDIAKYFSKKEWEKMKYSEKISYVYMKRNYEAMTKL	1/1:24:61	3.7e-17	AFDDIAKYFSKKEWEKMKYSEKISYVYMKRNYEAMTKL	1/1:24:61	1.3e-24	AFDDIAKYFSKKEWEKMKYSEKISYVYMKRNYEAMTKL	1/1:24:61	5.7e-09	AFDDIAKYFSKKEWEKMKYSEKISYVYMKRNYEAMTKL	1/1:24:61	9.9e-25	AFDDIAKYFSKKEWEKMKYSEKISYVYMKRNYEAMTKL
339	SSX ortho/para		A0A2K5XI82	mleu	Mandrillus leucophaeus	Drill	Primates	KRAB-related domain-containing protein; SSX5-like according to ENSEMBL	MSGDDASARRPRVGAQIPEKIQKAFDDIAKYFSKKEWERMKVSEKIVYVYKKRKYEAMSKLGFKVTLPPFMRNKRATDFQGNDSDNDPNHGNQVEHPQMTSSMLQGIFPKIMPEEPAEEGNDSKGVPEASGPQNDVKQLSPPGKPSTSEKINKTSENREAQEEEERWGTAHRWSSQNTRNIGPKREKHAWTHRLRERKHPVIYEEISDPEEDDE				PF09514 [SSXRD]			1/1:22:61	2.5e-05	QKAFDDIAKYFSKKEWERMKVSEKIVYVYKKRKYEAMSKL	1/1:24:61	3.7e-13	AFDDIAKYFSKKEWERMKVSEKIVYVYKKRKYEAMSKL	1/1:24:61	1.4e-21	AFDDIAKYFSKKEWERMKVSEKIVYVYKKRKYEAMSKL	1/1:24:61	5.9e-09	AFDDIAKYFSKKEWERMKVSEKIVYVYKKRKYEAMSKL	1/1:24:61	6.7e-22	AFDDIAKYFSKKEWERMKVSEKIVYVYKKRKYEAMSKL
340	SSX ortho/para		A0A2K6A4D1	mleu	Mandrillus leucophaeus	Drill	Primates	KRAB-related domain-containing protein; Putative protein SSX6 according to ENSEMBL	IVLELLAFVGIAKYFSKKEWEKMKYSEKISCVHMKRKYEAMTKLGFNVTLPPFMRNKQATDFQGNDSDNDRNCGNQVERPQTTFGRFQRIFPKRMLKKPAEEGNDSKGVPEASGPQNDGKQLCPPGKANTSEKINKRSGNREAQEEERWGTAHQWSSQNTHDIDQLRPKRGKHAWTHRLRERKQLVIYEEISDPEEDDE				PF09514 [SSXRD]			1/1:5:44	0.00014	LLAFVGIAKYFSKKEWEKMKYSEKISCVHMKRKYEAMTKL	1/1:7:44	3.1e-14	AFVGIAKYFSKKEWEKMKYSEKISCVHMKRKYEAMTKL	1/1:7:44	4.4e-22	AFVGIAKYFSKKEWEKMKYSEKISCVHMKRKYEAMTKL	1/1:7:44	4.2e-07	AFVGIAKYFSKKEWEKMKYSEKISCVHMKRKYEAMTKL	1/1:7:44	1.4e-21	AFVGIAKYFSKKEWEKMKYSEKISCVHMKRKYEAMTKL
341	SSX ortho/para		A0A2K5ZA93	mleu	Mandrillus leucophaeus	Drill	Primates	KRAB-related domain-containing protein; SSX3-like according to ENSEMBL	MNRDEDCAKRARDDAQTPEKIQKPFDDIAKYFSEKEWEKMKYSEKIIYVYMKRKYEAMTKLGFKVTHPPFMRNKRATDFQGNDSDNDCNRGNQVERPQMTFGRLQGIFLKIMPKMPAGEGNDSKGMSEASGSQNDGKQLCPSGKPSTSEKINATSGKRKQFGNNPSGFPGYVQVCGLGVWHGSQTSLGPGWAEELAQLQMRC							1/1:22:61	4e-06	QKPFDDIAKYFSEKEWEKMKYSEKIIYVYMKRKYEAMTKL	1/1:24:61	6.2e-13	PFDDIAKYFSEKEWEKMKYSEKIIYVYMKRKYEAMTKL	1/1:24:61	8.3e-24	PFDDIAKYFSEKEWEKMKYSEKIIYVYMKRKYEAMTKL	1/1:24:61	6.3e-09	PFDDIAKYFSEKEWEKMKYSEKIIYVYMKRKYEAMTKL	1/1:24:61	1.1e-22	PFDDIAKYFSEKEWEKMKYSEKIIYVYMKRKYEAMTKL
342	SSX ortho/para		A0A2K5XR02	mleu	Mandrillus leucophaeus	Drill	Primates	KRAB-related domain-containing protein	MNSDDAFARRPNVGAQIPEKIQKAFDDIAKCFSKKEWEKMKYSEKIIYVYMKRKYEAMTKLGFRVTLPPFMHNKRATDFQGNDFDNDHNRGNQVERPQLSTFSMLQGIFPKIMPKKPAPAEEGNDLKGVSETSGPKNDGKQLCPPGKANTSEKTNKRS							1/1:22:61	4.5e-06	QKAFDDIAKCFSKKEWEKMKYSEKIIYVYMKRKYEAMTKL	1/1:24:61	1.6e-12	AFDDIAKCFSKKEWEKMKYSEKIIYVYMKRKYEAMTKL	1/1:24:61	1.1e-23	AFDDIAKCFSKKEWEKMKYSEKIIYVYMKRKYEAMTKL	1/1:24:61	8.8e-09	AFDDIAKCFSKKEWEKMKYSEKIIYVYMKRKYEAMTKL	1/1:24:61	6.7e-23	AFDDIAKCFSKKEWEKMKYSEKIIYVYMKRKYEAMTKL
343	SSX ortho/para		A0A2K6A9W7	mleu	Mandrillus leucophaeus	Drill	Primates	KRAB-related domain-containing protein	VNRDDACAKRPRDDAQIPEKIQKYPWRQVCDLALHLVTLSPFWKVGRESASSIKALLCGRVQASAFDDIPEYFSKKKWEKMKALEKIISVCMKRKYEAMTKLIERPQMTFSRLQRIFLKIVPKKPAEEGNDSKGMSEASGPQNDGKQLCPPGKPSTSEKINKTP							1/1:63:102	0.00027	ASAFDDIPEYFSKKKWEKMKALEKIISVCMKRKYEAMTKL	1/1:65:102	1.7e-13	AFDDIPEYFSKKKWEKMKALEKIISVCMKRKYEAMTKL	1/1:65:102	8.4e-21	AFDDIPEYFSKKKWEKMKALEKIISVCMKRKYEAMTKL	1/1:65:102	3.3e-08	AFDDIPEYFSKKKWEKMKALEKIISVCMKRKYEAMTKL	1/1:65:102	1.2e-19	AFDDIPEYFSKKKWEKMKALEKIISVCMKRKYEAMTKL
344	SSX ortho/para		A0A2K5XWB2	mleu	Mandrillus leucophaeus	Drill	Primates	KRAB-related domain-containing protein	MNGDDAFARRPRVASKMPEKIRKKEWEKMKASEKIIYVYMKRKYEAMTKLGFKVTLPPFMHNKRATDFQGNDSDNGCNHGNQVEHPQMTFGRLQGIFLKIMPKKPAEEGNDSKEVPELCPPGKANTSEKINKRSGNREAQKKEDRQGTNTHNIGRLRPKRGKHAWTHRLCERKQLVIYEEISDAEEDDE				PF09514 [SSXRD]						1/1:17:50	0.00015	MPEKIRKKEWEKMKASEKIIYVYMKRKYEAMTKL	1/1:13:50	7.6e-17	VASKMPEKIRKKEWEKMKASEKIIYVYMKRKYEAMTKL	1/1:13:50	0.00015	VASKMPEKIRKKEWEKMKASEKIIYVYMKRKYEAMTKL	1/1:13:50	5.2e-13	VASKMPEKIRKKEWEKMKASEKIIYVYMKRKYEAMTKL
345	SSX ortho/para		ENSMICP00000015702	mmur	Microcebus murinus	Lesser mouse lemur	Primates		TFKDISKYFSKEEWSRLGYSQKTSYVYMKKNYDTMTRLGLKTNLPAFMSSKRRAIKSQAQGSAGQRQSRRNQXXXXXXXXXXXXXXXXXVMPKKPTKKGNDLKGVSRTRGSERAQRQLCPTGKASTSRKQTKKTGHKKKGKNAWTHRLRERKNQVAYEEISDPEEDDD		IPR003655 [KRAB-related]	IPR001909 [KRAB]	IPR019041 [SSXRD]			1/1:1:38	1.1e-07	TFKDISKYFSKEEWSRLGYSQKTSYVYMKKNYDTMTRL	1/1:1:38	1.4e-16	TFKDISKYFSKEEWSRLGYSQKTSYVYMKKNYDTMTRL	1/1:1:38	1.4e-21	TFKDISKYFSKEEWSRLGYSQKTSYVYMKKNYDTMTRL	1/1:1:38	1.8e-10	TFKDISKYFSKEEWSRLGYSQKTSYVYMKKNYDTMTRL	1/1:1:38	6.5e-24	TFKDISKYFSKEEWSRLGYSQKTSYVYMKKNYDTMTRL
346	SSX ortho/para		G1QTM8	nleu	Nomascus leucogenys	Northern white-cheeked gibbon	Primates	100593675 [Gene Symbol: LOC100593675] [Locus Tag: ] [Chromosome: X] [Map Location: ] [Description: putative protein SSX6] [Gene Type: protein-coding]	MNRDDTFAKRPRDDAKASEKRSKAFDDIAEYFSKEEWEKMKYSEKISCVHLKRKYEAMTKLGFNVALPPFMRNKQTTDSQRNDFDNDRNRGNEVECPQMTSGSLQRNIPKITPEKPAEEGSGWKGVSEASAPQNHGKELCPPGNPSTSEKIHETSGPERGEHAWTHRLRERKQVVIYEEISDPEEDDE				PF09514 [SSXRD]			1/1:22:61	3.8e-05	SKAFDDIAEYFSKEEWEKMKYSEKISCVHLKRKYEAMTKL	1/1:24:61	3.1e-16	AFDDIAEYFSKEEWEKMKYSEKISCVHLKRKYEAMTKL	1/1:24:61	7.5e-23	AFDDIAEYFSKEEWEKMKYSEKISCVHLKRKYEAMTKL	1/1:24:61	2.1e-08	AFDDIAEYFSKEEWEKMKYSEKISCVHLKRKYEAMTKL	1/1:24:61	2.8e-22	AFDDIAEYFSKEEWEKMKYSEKISCVHLKRKYEAMTKL
347	SSX ortho/para		ENSNLEP00000004350	nleu	Nomascus leucogenys	Northern white-cheeked gibbon	Primates	Uncharacterized protein	MNGDDAFARRPRFGSQIPETVQKAFDDIAKYFSKEEWEKMKASEKIIYVYMKRKYEAMTKLGFKATLPSFMRNKRATDLQGNDFDNDHNRGHQVERPQMTSGTLQGIFPKIMPKKPAEEGNDSKEVPEASAPQNHGKQLCPPGNPSTSEKIHETSGPKRGEHAWTHRLRERKQVVIYEEISDPEEDDE		IPR003655 [KRAB-related]	IPR001909 [KRAB]	IPR019041 [SSXRD]			1/1:22:61	8.9e-07	QKAFDDIAKYFSKEEWEKMKASEKIIYVYMKRKYEAMTKL	1/1:24:61	4.5e-16	AFDDIAKYFSKEEWEKMKASEKIIYVYMKRKYEAMTKL	1/1:24:61	3.3e-24	AFDDIAKYFSKEEWEKMKASEKIIYVYMKRKYEAMTKL	1/1:24:61	2.9e-10	AFDDIAKYFSKEEWEKMKASEKIIYVYMKRKYEAMTKL	1/1:24:61	7.1e-24	AFDDIAKYFSKEEWEKMKASEKIIYVYMKRKYEAMTKL
348	SSX ortho/para		G1QTT3	nleu	Nomascus leucogenys	Northern white-cheeked gibbon	Primates	100580639 [Gene Symbol: LOC100580639] [Locus Tag: ] [Chromosome: Un] [Map Location: ] [Description: protein SSX3] [Gene Type: protein-coding]	MNGDDAFARRPTVGAQMLENIQKAFDDIAKYFSKEEWEKMKASEKIIYVYMKRKYEAMTKLGFKATLPSFMRNKRATDLQGNDFDNDHNRGHQVERPQMTSGTLQGIFPKIMPKKPAEEGNDSKEVPEASAPQNHGKQLCPPGNPSTSEKIHETSGPKRGEHAWTHRLRERKQVVIYEEISDPEEDDE			PF01352 [KRAB]	PF09514 [SSXRD]			1/1:22:61	8.9e-07	QKAFDDIAKYFSKEEWEKMKASEKIIYVYMKRKYEAMTKL	1/1:24:61	4.5e-16	AFDDIAKYFSKEEWEKMKASEKIIYVYMKRKYEAMTKL	1/1:24:61	3.3e-24	AFDDIAKYFSKEEWEKMKASEKIIYVYMKRKYEAMTKL	1/1:24:61	2.9e-10	AFDDIAKYFSKEEWEKMKASEKIIYVYMKRKYEAMTKL	1/1:24:61	7.1e-24	AFDDIAKYFSKEEWEKMKASEKIIYVYMKRKYEAMTKL
349	SSX ortho/para		A0A2I3G757	nleu	Nomascus leucogenys	Northern white-cheeked gibbon	Primates	100580298 [Gene Symbol: LOC100580298] [Locus Tag: ] [Chromosome: Un] [Map Location: ] [Description: protein SSX4] [Gene Type: protein-coding]	MNGDDAFASRPRDDAQISDKLRKAFDDIAKYFSKNEWEKMKSSEKIIYVYMKRKYEAMTKLGFKVTLPPFMCSKRAADFQGNDFYNDRNHRNQVERPQTTFGRLQRIFPKITPEKPAEEGSGWKGVSEASAPQNHGKQLCPPGNPSTSEKIHETSGAKRGEHAWTHRLHERKQLVIYEEISDPEEDDE				PF09514 [SSXRD]			1/1:22:61	2e-06	RKAFDDIAKYFSKNEWEKMKSSEKIIYVYMKRKYEAMTKL	1/1:24:61	3.9e-15	AFDDIAKYFSKNEWEKMKSSEKIIYVYMKRKYEAMTKL	1/1:24:61	7.9e-24	AFDDIAKYFSKNEWEKMKSSEKIIYVYMKRKYEAMTKL	1/1:24:61	2.2e-10	AFDDIAKYFSKNEWEKMKSSEKIIYVYMKRKYEAMTKL	1/1:24:61	2e-23	AFDDIAKYFSKNEWEKMKSSEKIIYVYMKRKYEAMTKL
350	SSX ortho/para		ENSNLEP00000004296	nleu	Nomascus leucogenys	Northern white-cheeked gibbon	Primates	Uncharacterized protein	MNGDDAFASRPRDDAQISDKLRKAFDDIAKYFSKNEWEKMKSSEKIIYVYMKRKYEAMTKLGFKVTLPPFMCSKRAADFQGNDFYNDRNHRNQVERPQTTFGRLQRIFPKIMPKKPAEEGNDSKEVPEASAPQNHGKELCPPGNPSTSEKIHETSGPKRGKHAWTHRLRERKQVVIYEEISDPEEDDE		IPR003655 [KRAB-related]	IPR001909 [KRAB]	IPR019041 [SSXRD]			1/1:22:61	2e-06	RKAFDDIAKYFSKNEWEKMKSSEKIIYVYMKRKYEAMTKL	1/1:24:61	3.9e-15	AFDDIAKYFSKNEWEKMKSSEKIIYVYMKRKYEAMTKL	1/1:24:61	7.9e-24	AFDDIAKYFSKNEWEKMKSSEKIIYVYMKRKYEAMTKL	1/1:24:61	2.2e-10	AFDDIAKYFSKNEWEKMKSSEKIIYVYMKRKYEAMTKL	1/1:24:61	2e-23	AFDDIAKYFSKNEWEKMKSSEKIIYVYMKRKYEAMTKL
351	SSX ortho/para		A0A2I3G106	nleu	Nomascus leucogenys	Northern white-cheeked gibbon	Primates	100607493 [Gene Symbol: LOC100607493] [Locus Tag: ] [Chromosome: X] [Map Location: ] [Description: putative protein SSX8] [Gene Type: protein-coding]	MNGDDAFAKRPRDDAKTSEKRSKALDDIATYFSKKEWENMKYSEKISYVYMKRNYEAMTKLGFNVTLPPFMCNKQATDFQGNDSDNDRNRRNEVERLQMTFGRLQRIIPKITPEEPAEEGNDWKGVSEASAPQNDRKQLCPPGKANTSEKINKTSGPKRGKHAWTHRLRERKQVVIYEEISDPEEDDE				PF09514 [SSXRD]			1/1:22:61	2e-06	SKALDDIATYFSKKEWENMKYSEKISYVYMKRNYEAMTKL	1/1:24:61	2.2e-16	ALDDIATYFSKKEWENMKYSEKISYVYMKRNYEAMTKL	1/1:24:61	4.1e-23	ALDDIATYFSKKEWENMKYSEKISYVYMKRNYEAMTKL	1/1:24:61	1e-08	ALDDIATYFSKKEWENMKYSEKISYVYMKRNYEAMTKL	1/1:24:61	2.8e-23	ALDDIATYFSKKEWENMKYSEKISYVYMKRNYEAMTKL
352	SSX ortho/para		G1QTT2	nleu	Nomascus leucogenys	Northern white-cheeked gibbon	Primates	100587351 [Gene Symbol: LOC100587351] [Locus Tag: ] [Chromosome: X] [Map Location: ] [Description: protein SSX7-like] [Gene Type: protein-coding]	MNGEDTLARRPTVGAQIPEKVQKASDDIAKYFSKKEWEKMKATEKITYVYMKRKYEVMAKLGLKPTFPPFMRNTGATDLQGNDSDNDGNRGNEVERPQMTFGRLQRIFPKITPENPAEEGSGWKGVSEASAPQNHGKQLCPPGNPSTSEKIHETSGPKRGEHAWTHRLRERKQVVIYEEISDPEEDDE				PF09514 [SSXRD]			1/1:22:61	3.9e-05	QKASDDIAKYFSKKEWEKMKATEKITYVYMKRKYEVMAKL	1/1:24:61	1.9e-14	ASDDIAKYFSKKEWEKMKATEKITYVYMKRKYEVMAKL	1/1:24:61	6.3e-22	ASDDIAKYFSKKEWEKMKATEKITYVYMKRKYEVMAKL	1/1:24:61	4.6e-09	ASDDIAKYFSKKEWEKMKATEKITYVYMKRKYEVMAKL	1/1:24:61	2.7e-21	ASDDIAKYFSKKEWEKMKATEKITYVYMKRKYEVMAKL
353	SSX ortho/para		G1QTT6	nleu	Nomascus leucogenys	Northern white-cheeked gibbon	Primates	KRAB-related domain-containing protein	MNGDNDCAKRARDDAQIPEKIQKAFDDIAKYFSKKEWKMKASEKITYVHLKRKYEVMTKLGLKVTLSPFMHNKWAADCQGNDFVKDRNRGNEVERPQMTFGRLQRIFPK							1/1:22:60	0.00018	QKAFDDIAKYFSKKEWKMKASEKITYVHLKRKYEVMTKL	1/1:24:60	3.1e-13	AFDDIAKYFSKKEWKMKASEKITYVHLKRKYEVMTKL	1/1:24:60	2.2e-20	AFDDIAKYFSKKEWKMKASEKITYVHLKRKYEVMTKL	1/1:24:60	5.8e-08	AFDDIAKYFSKKEWKMKASEKITYVHLKRKYEVMTKL	1/1:24:60	1.2e-19	AFDDIAKYFSKKEWKMKASEKITYVHLKRKYEVMTKL
354	SSX ortho/para		ENSOGAP00000021690	ogar	Otolemur garnettii	Garnett's greater bushbaby	Primates	Uncharacterized protein	MNRSGPFLTGPREDAQKSQKKCKAFKDISKYFPKEEWDKLRYSEKITYVYMKRNYDTMTRLGLNAALPDFMCPERKAVKSQDQNSGDDSHRDQKKKQKKTQLTLFICDLHIKKMMPSKQAKKGNDAKEMPGTSGSEQAKGQHGQQGKERTSGKKTKKTSGKEKKKGKSVWAHRLRERKNFIIYEEISDPEEED		IPR003655 [KRAB-related]	IPR001909 [KRAB]	IPR019041 [SSXRD]			1/1:22:61	4.1e-06	CKAFKDISKYFPKEEWDKLRYSEKITYVYMKRNYDTMTRL	1/1:24:61	8e-17	AFKDISKYFPKEEWDKLRYSEKITYVYMKRNYDTMTRL	1/1:24:61	9.8e-24	AFKDISKYFPKEEWDKLRYSEKITYVYMKRNYDTMTRL	1/1:24:61	1.3e-10	AFKDISKYFPKEEWDKLRYSEKITYVYMKRNYDTMTRL	1/1:24:61	3e-25	AFKDISKYFPKEEWDKLRYSEKITYVYMKRNYDTMTRL
355	SSX ortho/para		A0A2R9AY06	ppan	Pan paniscus	Bonobo	Primates	100967520 [Gene Symbol: LOC100967520] [Locus Tag: ] [Chromosome: X] [Map Location: ] [Description: protein SSX2-like] [Gene Type: protein-coding]	MNGDDAFAKRPRVDAQIPEKIQKAFDDIAKYFSKEEWEKMKASEKILYVYMKRKYEAMTKLGFKATLPPFMCNKWAADFQGNDFDNDYNRGHQVEHPQMTFGRLQGIFPKIMPKKSAEEGNYSKGVPEASGPQKDGKQLCPPGKPSTSEKINKTSGPKRGKHAWTHRLRERKQLVIYEEISDPEEDDE			PF01352 [KRAB]	PF09514 [SSXRD]			1/1:22:61	1.7e-07	QKAFDDIAKYFSKEEWEKMKASEKILYVYMKRKYEAMTKL	1/1:24:61	7.4e-16	AFDDIAKYFSKEEWEKMKASEKILYVYMKRKYEAMTKL	1/1:24:61	6.8e-24	AFDDIAKYFSKEEWEKMKASEKILYVYMKRKYEAMTKL	1/1:24:61	4.6e-10	AFDDIAKYFSKEEWEKMKASEKILYVYMKRKYEAMTKL	1/1:24:61	1.4e-23	AFDDIAKYFSKEEWEKMKASEKILYVYMKRKYEAMTKL
356	SSX ortho/para		A0A2R9CR28	ppan	Pan paniscus	Bonobo	Primates	100995951 [Gene Symbol: LOC100995951] [Locus Tag: ] [Chromosome: X] [Map Location: ] [Description: protein SSX3] [Gene Type: protein-coding]	MNGDDTFARRPTVGAQIPEKIQKAFDDIAKYFSKEEWEKMKVSEKIVYVYMKRKYEAMTKLGFKAILPPFMCNKRAEDFQGNDFDNDPNRGNQVERPQMTFGRLQGISPKIMPKKPAEEGNVSKEVPEASGPQNDGKQLCPPGKPTTSEKINMISGPKRREHAWTHRLRERKQLVIYEEISDPEEDDE				PF09514 [SSXRD]			1/1:22:61	1.6e-06	QKAFDDIAKYFSKEEWEKMKVSEKIVYVYMKRKYEAMTKL	1/1:24:61	1.3e-15	AFDDIAKYFSKEEWEKMKVSEKIVYVYMKRKYEAMTKL	1/1:24:61	1e-23	AFDDIAKYFSKEEWEKMKVSEKIVYVYMKRKYEAMTKL	1/1:24:61	1.3e-10	AFDDIAKYFSKEEWEKMKVSEKIVYVYMKRKYEAMTKL	1/1:24:61	1.6e-24	AFDDIAKYFSKEEWEKMKVSEKIVYVYMKRKYEAMTKL
357	SSX ortho/para		A0A2R9BBU2	ppan	Pan paniscus	Bonobo	Primates	KRAB-related domain-containing protein	MNGDDAFARRPKAGAQIPEKIQKAFDDIAKYFSKKEWEKMKSSEKISYVYMKRKYEAMTKLGFKATLPPFMRNTGATDLQGNDFDNDRNHRNQEMSPILFICDLHIIKIMPKKPAENDGKQLCPPGKRTTSEKINKASGNREAQEKEERRGTAHRWSSQNTHNIGPKRGKHAWTHRLSERKQLVIYEEISDPEEDNE				PF09514 [SSXRD]			1/1:22:61	5.5e-06	QKAFDDIAKYFSKKEWEKMKSSEKISYVYMKRKYEAMTKL	1/1:24:61	5.6e-16	AFDDIAKYFSKKEWEKMKSSEKISYVYMKRKYEAMTKL	1/1:24:61	1.1e-23	AFDDIAKYFSKKEWEKMKSSEKISYVYMKRKYEAMTKL	1/1:24:61	1.8e-09	AFDDIAKYFSKKEWEKMKSSEKISYVYMKRKYEAMTKL	1/1:24:61	2.5e-23	AFDDIAKYFSKKEWEKMKSSEKISYVYMKRKYEAMTKL
358	SSX ortho/para		A0A2R9A9S9	ppan	Pan paniscus	Bonobo	Primates	KRAB-related domain-containing protein	MNGDDTFAKRPRDGAKTSKKRSKAFDDIATYFPKKEWKKMKYSEKISYVYMKRNYKAMTKLGKCVTLPALLRTFIKVMHVKTTIEMSLILFICNLHIIKIMPKKPAEDENDSKGVSEASGPQKDGKQLHSPGKANISEKINKRSGPKRGKHAWTHRLRERKQLVIYEEISDPEEDDE				PF09514 [SSXRD]			1/1:22:61	2.6e-06	SKAFDDIATYFPKKEWKKMKYSEKISYVYMKRNYKAMTKL	1/1:24:61	4.6e-16	AFDDIATYFPKKEWKKMKYSEKISYVYMKRNYKAMTKL	1/1:24:61	7.4e-23	AFDDIATYFPKKEWKKMKYSEKISYVYMKRNYKAMTKL	1/1:24:61	1.6e-08	AFDDIATYFPKKEWKKMKYSEKISYVYMKRNYKAMTKL	1/1:24:61	5.8e-23	AFDDIATYFPKKEWKKMKYSEKISYVYMKRNYKAMTKL
359	SSX ortho/para		A0A2R9BMP9	ppan	Pan paniscus	Bonobo	Primates	KRAB-related domain-containing protein	MNGDDAFAKRLRDDAKTSEKRSKAFDDIATYFSKKEWEKMKYSEKISYVYMKRNYEAMTKLGFNVTLPPFMCNKQATDFQGNDFDNDRNRRIQVERPQMTFGRLQRIIPKIMPKKPAEEGNDSKGVSEASGPQNDGKQLPNTSEKINKRSGPKRGRHAWTHRLRERKQLVIYEEISDPEEDDE			PF01352 [KRAB]	PF09514 [SSXRD]			1/1:22:61	5.8e-07	SKAFDDIATYFSKKEWEKMKYSEKISYVYMKRNYEAMTKL	1/1:24:61	1.2e-17	AFDDIATYFSKKEWEKMKYSEKISYVYMKRNYEAMTKL	1/1:24:61	2.5e-24	AFDDIATYFSKKEWEKMKYSEKISYVYMKRNYEAMTKL	1/1:24:61	3.8e-09	AFDDIATYFSKKEWEKMKYSEKISYVYMKRNYEAMTKL	1/1:24:61	1.3e-24	AFDDIATYFSKKEWEKMKYSEKISYVYMKRNYEAMTKL
360	SSX ortho/para		A0A2I3S866	ptro	Pan troglodytes	Chimpanzee	Primates	741661 [Gene Symbol: SSX2B] [Locus Tag: CK820_G0055497] [Chromosome: X] [Map Location: ] [Description: SSX family member 2B] [Gene Type: protein-coding]	MNGDDAFARRPTVGAQIPEKIQKAFDDIAKYFSKEEWEKMKASEKIFYVYMKRKYEAMTKLGFKATLPPFMCNKRAEDFQGNDFDNDPNRGNQVERPQMTFGRLQGISPKIMPKKPAEEGNDSEEVPEASGPQNDGKQLCPPGKPTTSEKIHERSGPKRREHAWTHRLRERKQLVIYEEISDPEEDDE			PF01352 [KRAB]	PF09514 [SSXRD]			1/1:22:61	1e-06	QKAFDDIAKYFSKEEWEKMKASEKIFYVYMKRKYEAMTKL	1/1:24:61	1.6e-15	AFDDIAKYFSKEEWEKMKASEKIFYVYMKRKYEAMTKL	1/1:24:61	8.2e-24	AFDDIAKYFSKEEWEKMKASEKIFYVYMKRKYEAMTKL	1/1:24:61	1.2e-09	AFDDIAKYFSKEEWEKMKASEKIFYVYMKRKYEAMTKL	1/1:24:61	2.5e-23	AFDDIAKYFSKEEWEKMKASEKIFYVYMKRKYEAMTKL
361	SSX ortho/para		H2QYM9	ptro	Pan troglodytes	Chimpanzee	Primates	SSX5 isoform 2	MNGDDAFARRPRVDAQIPEKIQKAFDDIAKYFSKEEWEKMKASEKILYVYMKRKYEAMTKLGFKATLPPFMCNKWAADFQGNDFDNDYNRGHQVEHPQMTFGRLQGIFPKIMPKKSAEEGNYSKGVPEASGPQKDGKQLCPPGKPSTSEKINKTSGPKRGKHAWTHRLRERKQLVIYEEISDPEEDDE			PF01352 [KRAB]	PF09514 [SSXRD]			1/1:22:61	1.7e-07	QKAFDDIAKYFSKEEWEKMKASEKILYVYMKRKYEAMTKL	1/1:24:61	7.4e-16	AFDDIAKYFSKEEWEKMKASEKILYVYMKRKYEAMTKL	1/1:24:61	6.8e-24	AFDDIAKYFSKEEWEKMKASEKILYVYMKRKYEAMTKL	1/1:24:61	4.6e-10	AFDDIAKYFSKEEWEKMKASEKILYVYMKRKYEAMTKL	1/1:24:61	1.4e-23	AFDDIAKYFSKEEWEKMKASEKILYVYMKRKYEAMTKL
362	SSX ortho/para		A0A2I3S375	ptro	Pan troglodytes	Chimpanzee	Primates	KRAB-related domain-containing protein; SSX3 (according to ENSEMBL)	MNGDDAFARRPRDDAQISEKLRKAFDDIAKYFSKEEWEKMKSSEKIVYVYMKLNYEVMTKLGFKAILPPFMRNKQAEDFQGNDFDNDPNRGNQVERPQMTFGRLQGISPKIMPKKPAEEGNVSKEVPEASGPQNDGKQLCPPGKPTTSEKINMISGPKRREHAWTHRLRERKQLVIYEEISDPEEDDE			PF01352 [KRAB]	PF09514 [SSXRD]			1/1:22:61	3.2e-07	RKAFDDIAKYFSKEEWEKMKSSEKIVYVYMKLNYEVMTKL	1/1:24:61	1.6e-16	AFDDIAKYFSKEEWEKMKSSEKIVYVYMKLNYEVMTKL	1/1:24:61	3.9e-23	AFDDIAKYFSKEEWEKMKSSEKIVYVYMKLNYEVMTKL	1/1:24:61	1.4e-10	AFDDIAKYFSKEEWEKMKSSEKIVYVYMKLNYEVMTKL	1/1:24:61	4e-24	AFDDIAKYFSKEEWEKMKSSEKIVYVYMKLNYEVMTKL
363	SSX ortho/para		ENSPTRP00000060627	ptro	Pan troglodytes	Chimpanzee	Primates	protein SSX4 [Source:NCBI gene;Acc:107966478	MNGDDAFARRPKDDAQISEKLRKAFDDIAKYFSKEEWEKMKSSEKIVYVYMKLNYEVMTKLGFKVTLPPFMCSKRAADFHGNDFGNDRNHRNQVERPQMTFGSLQRIFPKIMPKKPAEEENGLKEVPEASGPQNDGKQLCPPGNPSTLEKINKTSGPKRGRHAFTHRLRERKQLVIYEEISDPEEDDE		IPR003655 [KRAB-related]	IPR001909 [KRAB]	IPR019041 [SSXRD]			1/1:22:61	3.2e-07	RKAFDDIAKYFSKEEWEKMKSSEKIVYVYMKLNYEVMTKL	1/1:24:61	1.6e-16	AFDDIAKYFSKEEWEKMKSSEKIVYVYMKLNYEVMTKL	1/1:24:61	3.9e-23	AFDDIAKYFSKEEWEKMKSSEKIVYVYMKLNYEVMTKL	1/1:24:61	1.4e-10	AFDDIAKYFSKEEWEKMKSSEKIVYVYMKLNYEVMTKL	1/1:24:61	4e-24	AFDDIAKYFSKEEWEKMKSSEKIVYVYMKLNYEVMTKL
364	SSX ortho/para		A0A2I3SMH4	ptro	Pan troglodytes	Chimpanzee	Primates	KRAB-related domain-containing protein; SSX3 according to ENSEMBL	MRQAAILNLSCQFLTAISNLSCQFLTFSGQTTPCAMNGDDTFARRPTVGAQIPEKIQKAFDDIAKYFSKEEWEKMKVSEKIVYVYMKRKYEAMTKLGFKAILPPFMRNKQAEDFQGNDFDNDPNRGNQVERPQMTFGRLQGISPKIMPKKPAEEGNVSKEVPEASGPQNDGKQLCPPGKPTTSEKINMISGPKRREHAWTHRLRERKQLVIYEEISDPEEDDE				PF09514 [SSXRD]			1/1:57:96	1.6e-06	QKAFDDIAKYFSKEEWEKMKVSEKIVYVYMKRKYEAMTKL	1/1:59:96	1.3e-15	AFDDIAKYFSKEEWEKMKVSEKIVYVYMKRKYEAMTKL	1/1:59:96	1e-23	AFDDIAKYFSKEEWEKMKVSEKIVYVYMKRKYEAMTKL	1/1:59:96	1.3e-10	AFDDIAKYFSKEEWEKMKVSEKIVYVYMKRKYEAMTKL	1/1:59:96	1.6e-24	AFDDIAKYFSKEEWEKMKVSEKIVYVYMKRKYEAMTKL
365	SSX ortho/para		ENSPTRP00000037527	ptro	Pan troglodytes	Chimpanzee	Primates	Uncharacterized protein; UniProt A0A2I3T1A4; 737614 [Gene Symbol: SSX3] protein SSX2-like [Source:NCBI gene;Acc:737502	MNGDDTFARRPTVGAQIPEKIQKAFDDIAKYFSKEEWEKMKVSEKIVYVYMKRKYEAMTKLGFKAILPPFMRNKQAEDFQGNDFDNDPNRGNQVERPQMTFGRLQGISPKIMPKKPAEEGNVSKEVPEASGPQNDGKQLCPPGKPTTSEKINMISGPKRREHAWTHRLRERKQLVIYEEISDPEEDDE		IPR003655 [KRAB-related]	IPR001909 [KRAB]	IPR019041 [SSXRD]			1/1:22:61	1.6e-06	QKAFDDIAKYFSKEEWEKMKVSEKIVYVYMKRKYEAMTKL	1/1:24:61	1.3e-15	AFDDIAKYFSKEEWEKMKVSEKIVYVYMKRKYEAMTKL	1/1:24:61	1e-23	AFDDIAKYFSKEEWEKMKVSEKIVYVYMKRKYEAMTKL	1/1:24:61	1.3e-10	AFDDIAKYFSKEEWEKMKVSEKIVYVYMKRKYEAMTKL	1/1:24:61	1.6e-24	AFDDIAKYFSKEEWEKMKVSEKIVYVYMKRKYEAMTKL
366	SSX ortho/para		ENSPTRP00000037524	ptro	Pan troglodytes	Chimpanzee	Primates	protein SSX9-like [Source:NCBI gene;Acc:100608018	MNGDDAFARRPKAGAQIPEKIQKAFDDIAKYFSKKEWEKMKSSEKISYVYMKRKYEAMTKLGFKATLPPFMRNTGATDLQGNDFDNDRNHRNQVERPQMTFGRLQGIFPKIMPKKPAEVGNDSKVPEASGSQNNGKQLCPPGKRTTSEKINKASGPKRGKHAWTHRLSERKQLVIYEEISDPEEDNE		IPR003655 [KRAB-related]	IPR001909 [KRAB]	IPR019041 [SSXRD]			1/1:22:61	5.5e-06	QKAFDDIAKYFSKKEWEKMKSSEKISYVYMKRKYEAMTKL	1/1:24:61	5.6e-16	AFDDIAKYFSKKEWEKMKSSEKISYVYMKRKYEAMTKL	1/1:24:61	1.1e-23	AFDDIAKYFSKKEWEKMKSSEKISYVYMKRKYEAMTKL	1/1:24:61	1.8e-09	AFDDIAKYFSKKEWEKMKSSEKISYVYMKRKYEAMTKL	1/1:24:61	2.5e-23	AFDDIAKYFSKKEWEKMKSSEKISYVYMKRKYEAMTKL
367	SSX ortho/para		A0A2I3SU77	ptro	Pan troglodytes	Chimpanzee	Primates	465644 [Gene Symbol: LOC465644] [Locus Tag: ] [Chromosome: X] [Map Location: ] [Description: protein SSX8-like] [Gene Type: protein-coding]	MNGDDAFAKRLRDDAKTSEKRSKAFDDIATYFSKKEWEKMKYSEKISYVYMKRNYEAMTKLGFNVTLPPFMCNKQATDFQGNDFDNDRNRRIQVERPQMTFGRLQRIIPKIMPKKPAEEGNDSKGVSEASGPQNDGKQLRPPGKANTSEKINKRSGPKRGRRAWTHRLRERKQLVIYEEISDPEEDEE			PF01352 [KRAB]	PF09514 [SSXRD]			1/1:22:61	5.8e-07	SKAFDDIATYFSKKEWEKMKYSEKISYVYMKRNYEAMTKL	1/1:24:61	1.2e-17	AFDDIATYFSKKEWEKMKYSEKISYVYMKRNYEAMTKL	1/1:24:61	2.5e-24	AFDDIATYFSKKEWEKMKYSEKISYVYMKRNYEAMTKL	1/1:24:61	3.8e-09	AFDDIATYFSKKEWEKMKYSEKISYVYMKRNYEAMTKL	1/1:24:61	1.3e-24	AFDDIATYFSKKEWEKMKYSEKISYVYMKRNYEAMTKL
368	SSX ortho/para		ENSPTRP00000037631	ptro	Pan troglodytes	Chimpanzee	Primates	Uncharacterized protein	MNGDDTFAKRPRDGAKTSKKRSKAFDDIATYFSKKEWKKMKYSERISYVYMKRNYKAMTKLGFKVALPPFMCNKQATDFQGNDFDNDHNRRIQVEHPQMTFGRLHRIIPKIMPKKPAEDENDSKAVSEASGPQKDGKQLHSPGKANISEKINKRSGPKRGKHAWTHRLRERKQLVIYEEISDPEEDDE		IPR003655 [KRAB-related]	IPR001909 [KRAB]	IPR019041 [SSXRD]			1/1:22:61	4.4e-07	SKAFDDIATYFSKKEWKKMKYSERISYVYMKRNYKAMTKL	1/1:24:61	2e-15	AFDDIATYFSKKEWKKMKYSERISYVYMKRNYKAMTKL	1/1:24:61	7.2e-23	AFDDIATYFSKKEWKKMKYSERISYVYMKRNYKAMTKL	1/1:24:61	3e-08	AFDDIATYFSKKEWKKMKYSERISYVYMKRNYKAMTKL	1/1:24:61	2.8e-22	AFDDIATYFSKKEWKKMKYSERISYVYMKRNYKAMTKL
369	SSX ortho/para		A0A2I3RTR4	ptro	Pan troglodytes	Chimpanzee	Primates	KRAB-related domain-containing protein	MNGDDAFARRPKAGAQIPEKIQKAFDDIAKYFSKKEWEKMKSSEKISYVYMKRKYEAMTKLGFKATLPPFMRNTGATDLQGNDFDNDRNHRNQVERPQMTFGRLQGIFPKVMPEASGSQNNGKQLCPPGKRTTSEKINKASGNREAQEKEERRGTAHRWSSQNTHNIGPKRGKHAWTHRLSERKQLVIYEEISDPEEDNE				PF09514 [SSXRD]			1/1:22:61	5.5e-06	QKAFDDIAKYFSKKEWEKMKSSEKISYVYMKRKYEAMTKL	1/1:24:61	5.6e-16	AFDDIAKYFSKKEWEKMKSSEKISYVYMKRKYEAMTKL	1/1:24:61	1.1e-23	AFDDIAKYFSKKEWEKMKSSEKISYVYMKRKYEAMTKL	1/1:24:61	1.8e-09	AFDDIAKYFSKKEWEKMKSSEKISYVYMKRKYEAMTKL	1/1:24:61	2.5e-23	AFDDIAKYFSKKEWEKMKSSEKISYVYMKRKYEAMTKL
370	SSX ortho/para		A0A096MWN4	panu	Papio anubis	Olive baboon	Primates	KRAB-related domain-containing protein	MNSDDAFARRPNVGAQIPEKIQKAFDDIAKCFSKKEWEKMKYSEKIVYVYMKRKYEAMTKLGFRVTLPPFMHNKRATDFQRNDFDNDRNRGNQVERPQLSTFSMLQGIFPKIMPKKPAPAEEGNDLKGVSETSGPKNDGKQLCPPGKANTSEKTNKRSGPKRGKHAWTHRLCERKQLVIYEEISGPEEDDE				PF09514 [SSXRD]			1/1:22:61	5.5e-06	QKAFDDIAKCFSKKEWEKMKYSEKIVYVYMKRKYEAMTKL	1/1:24:61	1.6e-12	AFDDIAKCFSKKEWEKMKYSEKIVYVYMKRKYEAMTKL	1/1:24:61	1.7e-23	AFDDIAKCFSKKEWEKMKYSEKIVYVYMKRKYEAMTKL	1/1:24:61	2.4e-09	AFDDIAKCFSKKEWEKMKYSEKIVYVYMKRKYEAMTKL	1/1:24:61	9e-24	AFDDIAKCFSKKEWEKMKYSEKIVYVYMKRKYEAMTKL
371	SSX ortho/para		15499439_PANUB	panu	Papio anubis	Olive baboon	Primates		MNGDDAFARTPRVGAQIPEKIQKHPWRQVCDSALYLVTLIPFRKVGREPASSIKALLCGRGEARAFDDIAKYFPKKEWEKMKTSEKIIYVYKKRKYEAMNKLECPHVTEVSLEFGNLYQQRKMLMYSLSVERPQMTSGRLQGIFPKIMPEKPAEEGNDSKEVPGASGPQNDGKQPCPPGKPSTSKKINKRSGPKRGKHAWTHRLRERKQLVIYEEISDPEEDDE		IPR003655 [KRAB-related]		IPR019041 [SSXRD]			1/1:63:102	7.2e-05	ARAFDDIAKYFPKKEWEKMKTSEKIIYVYKKRKYEAMNKL	1/1:65:102	7.5e-13	AFDDIAKYFPKKEWEKMKTSEKIIYVYKKRKYEAMNKL	1/1:65:102	1.2e-21	AFDDIAKYFPKKEWEKMKTSEKIIYVYKKRKYEAMNKL	1/1:65:102	2.5e-08	AFDDIAKYFPKKEWEKMKTSEKIIYVYKKRKYEAMNKL	1/1:65:102	1.9e-20	AFDDIAKYFPKKEWEKMKTSEKIIYVYKKRKYEAMNKL
372	SSX ortho/para		15499434_PANUB	panu	Papio anubis	Olive baboon	Primates		MNRDEDCAKRARDDAQTPEKIQKAFDDIAKYFSKKDWEKMKTSEKIIYEYMKRKYEAMTKLGFKVTLPPFMRDKRATDFQGNDSXNDCNRGNQVERPQTTFGKLQGIFPKIMPKKPAEEGNDWKGVPEASGPQNHGKQLCPPGKPNTSEKINKRSGPKRGKHAWTHTLRERKQLVIYEEISDPEEDEEYLHK		IPR003655 [KRAB-related]	IPR001909 [KRAB]	IPR019041 [SSXRD]			1/1:22:61	2.1e-06	QKAFDDIAKYFSKKDWEKMKTSEKIIYEYMKRKYEAMTKL	1/1:24:61	1.9e-15	AFDDIAKYFSKKDWEKMKTSEKIIYEYMKRKYEAMTKL	1/1:24:61	9.3e-22	AFDDIAKYFSKKDWEKMKTSEKIIYEYMKRKYEAMTKL	1/1:24:61	1.1e-09	AFDDIAKYFSKKDWEKMKTSEKIIYEYMKRKYEAMTKL	1/1:24:61	3.4e-21	AFDDIAKYFSKKDWEKMKTSEKIIYEYMKRKYEAMTKL
373	SSX ortho/para		A0A096MN02	panu	Papio anubis	Olive baboon	Primates	100997105 [Gene Symbol: LOC100997105] [Locus Tag: ] [Chromosome: Un] [Map Location: ] [Description: putative protein SSX6] [Gene Type: protein-coding]	MNRDNAFAKRPRDDAKTSEKRSKAFDDIAKYFSKKEWEKMKYSEKISCVHMKRKYEAMTKLGFNVTLPPFMRNKQATDFQGNDSDNDRNCGNQVERPQTTFGRFQRIFPKIMLKKPAEEGNDSKGVPEASGPQNDGKQPCPPGKPSTSEKINKTSGPKRGKHAWTHRLRERKQLVIYEEISDPEEDDE		IPR003655 [KRAB-related]	IPR001909 [KRAB]	PF09514 [SSXRD]			1/1:22:61	2.8e-05	SKAFDDIAKYFSKKEWEKMKYSEKISCVHMKRKYEAMTKL	1/1:24:61	4.5e-16	AFDDIAKYFSKKEWEKMKYSEKISCVHMKRKYEAMTKL	1/1:24:61	1.3e-23	AFDDIAKYFSKKEWEKMKYSEKISCVHMKRKYEAMTKL	1/1:24:61	2.8e-08	AFDDIAKYFSKKEWEKMKYSEKISCVHMKRKYEAMTKL	1/1:24:61	4.5e-23	AFDDIAKYFSKKEWEKMKYSEKISCVHMKRKYEAMTKL
374	SSX ortho/para		A0A096N7K8	panu	Papio anubis	Olive baboon	Primates	-	MNGDNAFAKRPRDNAKTSKKRSKAFDDIAKYFSKKEWEKMKYSEKISYVYMKRNYEAMTKLGFNVTLPPFMHNKQATDFQGNDSDNDRNHRNQVERPQMTFGKLQRIIPKIIPKKPAEEGNDSKGVPEASDPQNDGKQPCPPGKANTSEKINKRSGPKRGKHAWTHRLRERKQLVIYEEISDPEEDDE		IPR003655 [KRAB-related]	IPR001909 [KRAB]	PF09514 [SSXRD]			1/1:22:61	1.2e-06	SKAFDDIAKYFSKKEWEKMKYSEKISYVYMKRNYEAMTKL	1/1:24:61	3.7e-17	AFDDIAKYFSKKEWEKMKYSEKISYVYMKRNYEAMTKL	1/1:24:61	1.3e-24	AFDDIAKYFSKKEWEKMKYSEKISYVYMKRNYEAMTKL	1/1:24:61	5.7e-09	AFDDIAKYFSKKEWEKMKYSEKISYVYMKRNYEAMTKL	1/1:24:61	9.9e-25	AFDDIAKYFSKKEWEKMKYSEKISYVYMKRNYEAMTKL
375	SSX ortho/para		A0A096NPJ4	panu	Papio anubis	Olive baboon	Primates	KRAB-related domain-containing protein; SSX5-like according to ENSEMBL	MNGDDASARRPRVGAQIPEKIQKAFDDIAKYFSKKEWERMKVSEKIVYVYKKRKYEAMSKLGFKVTLPPFMRNKRATDFQGNDSDDPNHGNQVEHPQMTSGRLQGIFPKIMPEKPAEEGNDSKGVPEASGPENDVKQLSPPGKPSTSEKINKTSENREAQEKEERQGTAHRWSSQNTRNIGPKRGKHAWTHRLRERKHPVIYEEISDPEEDDE				PF09514 [SSXRD]			1/1:22:61	2.5e-05	QKAFDDIAKYFSKKEWERMKVSEKIVYVYKKRKYEAMSKL	1/1:24:61	3.7e-13	AFDDIAKYFSKKEWERMKVSEKIVYVYKKRKYEAMSKL	1/1:24:61	1.4e-21	AFDDIAKYFSKKEWERMKVSEKIVYVYKKRKYEAMSKL	1/1:24:61	5.9e-09	AFDDIAKYFSKKEWERMKVSEKIVYVYKKRKYEAMSKL	1/1:24:61	6.7e-22	AFDDIAKYFSKKEWERMKVSEKIVYVYKKRKYEAMSKL
376	SSX ortho/para		15499435_PANUB	panu	Papio anubis	Olive baboon	Primates		MSSPSWAKPSRYPWRQVCDLALHLVTLSPFWKVGRESASSIKALLCGRVQASAFDDIPKYFSKKKWEKMKALEKIISVYMKRKYEAMTKLIESPQMTFSRLQRIFLKIVPKKPAEEGNDSKGMSEASGPQNEGKQLCPPGKPSTSEKINKTPGNMEAQEKEERRXRAHRWSSQNTHNIHRLSLLSSMGAVPGTPQTITHNRRTGRLHEEPEGPSVLDHMLKKLDLTSDGQLDFQEFLHLMDGMTVAYRDSFLKAAHSKKWI		IPR003655 [KRAB-related]					1/1:51:90	0.00034	ASAFDDIPKYFSKKKWEKMKALEKIISVYMKRKYEAMTKL	1/1:53:90	5.1e-13	AFDDIPKYFSKKKWEKMKALEKIISVYMKRKYEAMTKL	1/1:53:90	2.8e-21	AFDDIPKYFSKKKWEKMKALEKIISVYMKRKYEAMTKL	1/1:53:90	2.5e-08	AFDDIPKYFSKKKWEKMKALEKIISVYMKRKYEAMTKL	1/1:53:90	3.3e-20	AFDDIPKYFSKKKWEKMKALEKIISVYMKRKYEAMTKL
377	SSX ortho/para		15499441_PANUB	panu	Papio anubis	Olive baboon	Primates		MSLLEDDGPIRAHPWRQVCDRALHLVTLIPFWKVGRESASSIKALLCGRGEAREDPPCSAFNDIAQYFSKKEWEKMKFSEKIIFVYMKINYEAMTKLGFKVTLPPFMHNKRATDFQGNDFDNDHNGGNQVECPQMTFSKLQRILPKEGPAGLCSVTGATRIA		IPR003655 [KRAB-related]	IPR001909 [KRAB]				1/1:58:97	2.9e-06	CSAFNDIAQYFSKKEWEKMKFSEKIIFVYMKINYEAMTKL	1/1:60:97	1.5e-14	AFNDIAQYFSKKEWEKMKFSEKIIFVYMKINYEAMTKL	1/1:60:97	2.8e-22	AFNDIAQYFSKKEWEKMKFSEKIIFVYMKINYEAMTKL	1/1:60:97	3.6e-08	AFNDIAQYFSKKEWEKMKFSEKIIFVYMKINYEAMTKL	1/1:60:97	2.6e-21	AFNDIAQYFSKKEWEKMKFSEKIIFVYMKINYEAMTKL
378	SSX ortho/para		13535471_PANUB	panu	Papio anubis	Olive baboon	Primates		MNGDSIFAKRPKDDAQISEKRHNKAFNDTARYLSKKEWEKLKNSEKITYVYMKRNYETMTKLGLXATLPPFMYNKWAAEFXGNDFDTDXNCGNQEERPQMAFGMLHGNFPKMMPKKPAEEGNDLKGVPEASGSXSDGKQLCPPGKESTSEKSNKTSGPKKGEYVWIHRLQERKYLMIYKEISDPEEDDE		IPR003655 [KRAB-related]	IPR001909 [KRAB]	IPR019041 [SSXRD]			1/1:23:62	5.1e-06	NKAFNDTARYLSKKEWEKLKNSEKITYVYMKRNYETMTKL	1/1:25:62	8.7e-13	AFNDTARYLSKKEWEKLKNSEKITYVYMKRNYETMTKL	1/1:25:62	2e-22	AFNDTARYLSKKEWEKLKNSEKITYVYMKRNYETMTKL	1/1:25:62	1.4e-08	AFNDTARYLSKKEWEKLKNSEKITYVYMKRNYETMTKL	1/1:25:62	8.6e-22	AFNDTARYLSKKEWEKLKNSEKITYVYMKRNYETMTKL
379	SSX ortho/para		A0A096N950	panu	Papio anubis	Olive baboon	Primates	100997455 [Gene Symbol: LOC100997455] [Locus Tag: ] [Chromosome: X] [Map Location: ] [Description: putative protein SSX6] [Gene Type: pseudo]	MNRDNAFAKRPRDDAKTSENRSMAFVGIAKYFSKKEWEKMKYSEKINCVHMKRKYEAMTKLGFNVTLPPFMRNKRATDFQGNDIDNDRNRRNEVGRPQTTFGKLQRIVPKRMLKKPAEEGNDSKGVPEASGPQNDGKQLCPPGKANTSEKINKRSGPKMGKHAWTHRLRERKHPVIYEEISDPEEDDE				PF09514 [SSXRD]			1/1:22:61	9e-05	SMAFVGIAKYFSKKEWEKMKYSEKINCVHMKRKYEAMTKL	1/1:24:61	9.1e-14	AFVGIAKYFSKKEWEKMKYSEKINCVHMKRKYEAMTKL	1/1:24:61	6.6e-22	AFVGIAKYFSKKEWEKMKYSEKINCVHMKRKYEAMTKL	1/1:24:61	6.1e-07	AFVGIAKYFSKKEWEKMKYSEKINCVHMKRKYEAMTKL	1/1:24:61	4.1e-21	AFVGIAKYFSKKEWEKMKYSEKINCVHMKRKYEAMTKL
380	SSX ortho/para		A0A096MLV2	panu	Papio anubis	Olive baboon	Primates	KRAB-related domain-containing protein; SSX ortholog group according to ENSEMBL	INGDDAFARTPRVGAQIPEKIQKPFDDIAKYFSKKQWEKMKYSEKIICVYMKRKYEAMTKLGFKVTLPPFMRNKRATDFQGNDSDNDCNRGNQVERPQMTSGRLQGIFSKIMPKKPAEEGNDSKGVPEASGPQNDGKQLCPSGKPSTSEKINATSGPKRGKHAWTHRLRERKQLVIYEEISNTEEDEE				PF09514 [SSXRD]			1/1:22:61	0.00014	QKPFDDIAKYFSKKQWEKMKYSEKIICVYMKRKYEAMTKL	1/1:24:61	1.6e-13	PFDDIAKYFSKKQWEKMKYSEKIICVYMKRKYEAMTKL	1/1:24:61	1.5e-23	PFDDIAKYFSKKQWEKMKYSEKIICVYMKRKYEAMTKL	1/1:24:61	6.5e-08	PFDDIAKYFSKKQWEKMKYSEKIICVYMKRKYEAMTKL	1/1:24:61	5.4e-23	PFDDIAKYFSKKQWEKMKYSEKIICVYMKRKYEAMTKL
381	SSX ortho/para		A0A096MM56	panu	Papio anubis	Olive baboon	Primates	KRAB-related domain-containing protein	AFNDIAQYFSKKEWEKMKFSEKIIYVYMKINYEAMTKLGFKVTLPPFMHNKRATDFQGNDFDNDHNGGNQVECPQMTFSKLQRILPKPKRGKHAWTHRLRERKQLVIYEEISDPEEDEE			PF01352 [KRAB]	PF09514 [SSXRD]			1/1:1:38	2.6e-06	AFNDIAQYFSKKEWEKMKFSEKIIYVYMKINYEAMTKL	1/1:1:38	2.6e-15	AFNDIAQYFSKKEWEKMKFSEKIIYVYMKINYEAMTKL	1/1:1:38	7.5e-23	AFNDIAQYFSKKEWEKMKFSEKIIYVYMKINYEAMTKL	1/1:1:38	6.3e-09	AFNDIAQYFSKKEWEKMKFSEKIIYVYMKINYEAMTKL	1/1:1:38	2.3e-22	AFNDIAQYFSKKEWEKMKFSEKIIYVYMKINYEAMTKL
382	SSX ortho/para		ENSPPYP00000022796	pabe	Pongo abelii	Sumatran orangutan	Primates	Uncharacterized protein	MNGDDAFARRPTVGAQIPEKMQKAFDDIAKYFSKEEWEKMKASEKIIYVYMKRNYEAMTKLGFKATLPPFMRNKRAEDFQGNDSDNDPNRGNQVERPQMTFGRLQRIFPKIMPKKPAEEGNDSKGVPEASGSQNNGKQLCPPGKPSTSEKINKTSGPKRGKHAWTHRLHERKQLVIYEEISDPEEDDE		IPR003655 [KRAB-related]	IPR001909 [KRAB]	IPR019041 [SSXRD]			1/1:22:61	4.7e-08	QKAFDDIAKYFSKEEWEKMKASEKIIYVYMKRNYEAMTKL	1/1:24:61	2.6e-18	AFDDIAKYFSKEEWEKMKASEKIIYVYMKRNYEAMTKL	1/1:24:61	8.6e-25	AFDDIAKYFSKEEWEKMKASEKIIYVYMKRNYEAMTKL	1/1:24:61	2.7e-10	AFDDIAKYFSKEEWEKMKASEKIIYVYMKRNYEAMTKL	1/1:24:61	4.5e-25	AFDDIAKYFSKEEWEKMKASEKIIYVYMKRNYEAMTKL
383	SSX ortho/para		ENSPPYP00000022797	pabe	Pongo abelii	Sumatran orangutan	Primates	100449492 [Gene Symbol: LOC100449492] [Locus Tag: CR201_G0055945] [Chromosome: X] [Map Location: ] [Description: protein SSX4-like] [Gene Type: protein-coding] protein SSX4-like [Source:NCBI gene;Acc:100449492	MNGDDAFVRRPRDDQISEKIRKAFDDIAKYFSKKEREKMKSLEKIIYVFMKINYEVMTKLTLPFMCSKAADFQGNDLNDRNLRNQVERPQMTFGRLQRIFPKIMPKKPAEEGNDLKGVSEASGPQNDGKQLCPPGNTSTSEKINKTSGPKRGKHAWTHRLRERKQLVIYEEISDPEEDDE		IPR003655 [KRAB-related]	IPR001909 [KRAB]	IPR019041 [SSXRD]			1/1:21:60	1.7e-05	RKAFDDIAKYFSKKEREKMKSLEKIIYVFMKINYEVMTKL	1/1:23:60	1.2e-12	AFDDIAKYFSKKEREKMKSLEKIIYVFMKINYEVMTKL	1/1:23:60	1.6e-20	AFDDIAKYFSKKEREKMKSLEKIIYVFMKINYEVMTKL	1/1:23:60	5.3e-08	AFDDIAKYFSKKEREKMKSLEKIIYVFMKINYEVMTKL	1/1:23:60	2.6e-19	AFDDIAKYFSKKEREKMKSLEKIIYVFMKINYEVMTKL
384	SSX ortho/para		A0A2J8QZ45	pabe	Pongo abelii	Sumatran orangutan	Primates	-	MNGDDAFAKRPRDDAKTSEKRSKAFDDIATYFSKKEWEKMKYSEKINYVYMKRNYETMTKLGFNVTLPPFMHNKQATDFQGNDFDNDHNRRIQVEHLQVTFGRLQRTIPKIMPKKPAEEGNDSKGVSEASGPQNDGKQLRPPGKANTSEKINKRSGPKRGKHAWTHRLRERNQLVIYEEISDPEEDDE			PF01352 [KRAB]	PF09514 [SSXRD]			1/1:22:61	5.2e-07	SKAFDDIATYFSKKEWEKMKYSEKINYVYMKRNYETMTKL	1/1:24:61	9.6e-17	AFDDIATYFSKKEWEKMKYSEKINYVYMKRNYETMTKL	1/1:24:61	2.7e-24	AFDDIATYFSKKEWEKMKYSEKINYVYMKRNYETMTKL	1/1:24:61	2.9e-09	AFDDIATYFSKKEWEKMKYSEKINYVYMKRNYETMTKL	1/1:24:61	2.9e-24	AFDDIATYFSKKEWEKMKYSEKINYVYMKRNYETMTKL
385	SSX ortho/para		ENSPPYP00000023433	pabe	Pongo abelii	Sumatran orangutan	Primates	Uncharacterized protein; UniPRot H2PXF1; 100457489 [Gene Symbol: LOC100457489] [Locus Tag: CR201_G0052955] [Chromosome: X] protein SSX4 [Source:NCBI gene;Acc:100457489	MNGDDAFARRPRDDAQISEKLRKAFDDVAKYFSKKEWEMMKSLEKIVYVYMKLNYEVMTKLGFKVTLPPFVCSKRAAGFHGNDFDNDRNHRNQVERPQMTFGRLQRIFPKIMPKKPAEEGNDSKEVPEASGPQNDGKQLCSPGKPSTLEKINKTSGPKRGKHAWTHRLRERKQLVIYVEISDPEEDDK		IPR003655 [KRAB-related]	IPR001909 [KRAB]	IPR019041 [SSXRD]			1/1:22:61	5.5e-07	RKAFDDVAKYFSKKEWEMMKSLEKIVYVYMKLNYEVMTKL	1/1:24:61	7.1e-15	AFDDVAKYFSKKEWEMMKSLEKIVYVYMKLNYEVMTKL	1/1:24:61	5.8e-21	AFDDVAKYFSKKEWEMMKSLEKIVYVYMKLNYEVMTKL	1/1:24:61	6.9e-10	AFDDVAKYFSKKEWEMMKSLEKIVYVYMKLNYEVMTKL	1/1:24:61	1.5e-21	AFDDVAKYFSKKEWEMMKSLEKIVYVYMKLNYEVMTKL
386	SSX ortho/para		ENSPPYP00000022728	pabe	Pongo abelii	Sumatran orangutan	Primates	protein SSX3 [Source:NCBI gene;Acc:100445071	MNGDDTFAKRSTVGAQIPEKIQKAFDGIAKYFSKEEWEKMKASEKIVYVYMKRKYEAMTKLGFKATLPPFMHNKRTADFQGNDFDNDPNCGNEVERPQMTFGRLQGIFPKIMPKKPAEEGNVSKGVPEASGPQNDGKQLCSPGKPTTSGKINTISGPKRGKHAWTHRLRERKQLVIYEEISDPEEDDE		IPR003655 [KRAB-related]	IPR001909 [KRAB]	IPR019041 [SSXRD]			1/1:22:61	6.5e-06	QKAFDGIAKYFSKEEWEKMKASEKIVYVYMKRKYEAMTKL	1/1:24:61	5.1e-15	AFDGIAKYFSKEEWEKMKASEKIVYVYMKRKYEAMTKL	1/1:24:61	2.7e-23	AFDGIAKYFSKEEWEKMKASEKIVYVYMKRKYEAMTKL	1/1:24:61	2.7e-10	AFDGIAKYFSKEEWEKMKASEKIVYVYMKRKYEAMTKL	1/1:24:61	5.1e-24	AFDGIAKYFSKEEWEKMKASEKIVYVYMKRKYEAMTKL
387	SSX ortho/para		ENSPPYP00000023416	pabe	Pongo abelii	Sumatran orangutan	Primates	112130964 [Gene Symbol: LOC112130964] [Locus Tag: ] [Chromosome: X] [Map Location: ] [Description: putative protein SSX6] [Gene Type: protein-coding] putative protein SSX6 [Source:NCBI gene;Acc:100462500	MNRDDTFAKRPRDDDKASEKRSKAFGDIAKYFSKEEWEKMKYSEKISCVHVKRKYEAMTKLGFNVTLPPFMRNERATDSQRNDSDNDHNRGNEVEHPQMTFGRLQRTIPKIMPEKPAEEGNDSKGVPEASGSQNDGKQLCPPGKASSSEKIHERSGPKRGKHAWTHRLRERKQLVIYEEISDPEEDDE		IPR003655 [KRAB-related]	IPR001909 [KRAB]	IPR019041 [SSXRD]			1/1:22:61	2.9e-05	SKAFGDIAKYFSKEEWEKMKYSEKISCVHVKRKYEAMTKL	1/1:24:61	5.6e-17	AFGDIAKYFSKEEWEKMKYSEKISCVHVKRKYEAMTKL	1/1:24:61	1.1e-22	AFGDIAKYFSKEEWEKMKYSEKISCVHVKRKYEAMTKL	1/1:24:61	1.8e-08	AFGDIAKYFSKEEWEKMKYSEKISCVHVKRKYEAMTKL	1/1:24:61	4.4e-23	AFGDIAKYFSKEEWEKMKYSEKISCVHVKRKYEAMTKL
388	SSX ortho/para		ENSPPYP00000023423	pabe	Pongo abelii	Sumatran orangutan	Primates	100451987 [Gene Symbol: LOC100451987] [Locus Tag: ] [Chromosome: X] [Map Location: ] [Description: putative protein SSX6] [Gene Type: protein-coding] putative protein SSX6 [Source:NCBI gene;Acc:100451987	MNRDDTFAKRPRDDDKASEKRSKAFGDIAKYFSKEEWEKMKYSEKISCVHVKRKYEAMTKLGFNVTLPPFMRNERATDSQRNDSDNDHNRGNEVEHPQMTFGRLQRTIPKIMPEKPAEEGNDSKGVPEASGSQNDGKQLCPPGKASSSEKIHERSGSKRRKHAWTHRLRERKQLVIYEEISDPEEDDE		IPR003655 [KRAB-related]	IPR001909 [KRAB]	IPR019041 [SSXRD]			1/1:22:61	2.9e-05	SKAFGDIAKYFSKEEWEKMKYSEKISCVHVKRKYEAMTKL	1/1:24:61	5.6e-17	AFGDIAKYFSKEEWEKMKYSEKISCVHVKRKYEAMTKL	1/1:24:61	1.1e-22	AFGDIAKYFSKEEWEKMKYSEKISCVHVKRKYEAMTKL	1/1:24:61	1.8e-08	AFGDIAKYFSKEEWEKMKYSEKISCVHVKRKYEAMTKL	1/1:24:61	4.4e-23	AFGDIAKYFSKEEWEKMKYSEKISCVHVKRKYEAMTKL
389	SSX ortho/para		A0A2J8S2T0	pabe	Pongo abelii	Sumatran orangutan	Primates	-	MNGDDAFARRPRAGAQIPEKIQKSFDDIAKYFSKKEWEKMKSSEKIIYVYMKRKYEAMTKLGFKATLPPFMCNTGATDLQGNDFDNDRNQGNQVERPQMTFGRLQRIFLK				PF01352 [KRAB]			1/1:22:61	1.3e-06	QKSFDDIAKYFSKKEWEKMKSSEKIIYVYMKRKYEAMTKL	1/1:24:61	4.9e-15	SFDDIAKYFSKKEWEKMKSSEKIIYVYMKRKYEAMTKL	1/1:24:61	1.9e-23	SFDDIAKYFSKKEWEKMKSSEKIIYVYMKRKYEAMTKL	1/1:24:61	5.4e-10	SFDDIAKYFSKKEWEKMKSSEKIIYVYMKRKYEAMTKL	1/1:24:61	9.4e-23	SFDDIAKYFSKKEWEKMKSSEKIIYVYMKRKYEAMTKL
390	SSX ortho/para		ENSPPYP00000022727	pabe	Pongo abelii	Sumatran orangutan	Primates	Uncharacterized protein; Uniprot H2PVH8; 100444465 [Gene Symbol: LOC100444465] [Locus Tag: CR201_G0052967] [Chromosome: X] [Map Location: ] [Description: protein SSX7-like]	MNGDDAFARRPRAGAQIPEKVQKVFDDVAKYFSKKEWEKMKSSEKIIYVYMKRKYEAMTKLGFKATLSPFMRNKRATDLQGNDFDNHCNHGNQVERPQMTFGRLQRTIPKIMPEKPAEEGNDSKGVSEASGSQNDGKQLCPPGKPSTSEKIHKRSGPKRGKRARTHRLRERNQLVIYEEISDPEEDDK		IPR003655 [KRAB-related]	IPR001909 [KRAB]	IPR019041 [SSXRD]			1/1:22:61	7.7e-07	QKVFDDVAKYFSKKEWEKMKSSEKIIYVYMKRKYEAMTKL	1/1:24:61	1.3e-14	VFDDVAKYFSKKEWEKMKSSEKIIYVYMKRKYEAMTKL	1/1:24:61	7.5e-23	VFDDVAKYFSKKEWEKMKSSEKIIYVYMKRKYEAMTKL	1/1:24:61	2.2e-09	VFDDVAKYFSKKEWEKMKSSEKIIYVYMKRKYEAMTKL	1/1:24:61	6.9e-22	VFDDVAKYFSKKEWEKMKSSEKIIYVYMKRKYEAMTKL
391	SSX ortho/para		A0A2K6KNM9	rbie	Rhinopithecus bieti	black-and-white snub-nosed monkey	Primates	KRAB-related domain-containing protein; SSX2-like according to ENSEMBL	MNRDKDCAKRARDDAQTPEKIQKAFDDIAKYFAKKEWERMKASEKIIYVYKKRKYEVTLSTFMRNKRATDFQRNDSDNDRNRGNQVEHPQMSFGRLQGISPKIMPKKPAEEGNDWKGVPEASDPQNHGKQLCPPGKPNTSEKINKRSGNREAQEKEERQGRSSQNTHNIHLLRPKRGKHAWTHRLRERKQLAIYEEISDPEEDDE				PF09514 [SSXRD]			1/1:22:62	9.6e-05	QKAFDDIAKYFAKKEWERMKASEKIIYVYKKRKYEVTLSTF	1/1:24:61	7.8e-11	AFDDIAKYFAKKEWERMKASEKIIYVYKKRKYEVTLST	1/1:24:61	3.8e-19	AFDDIAKYFAKKEWERMKASEKIIYVYKKRKYEVTLST	1/1:24:61	1.8e-09	AFDDIAKYFAKKEWERMKASEKIIYVYKKRKYEVTLST	1/1:24:61	4.5e-19	AFDDIAKYFAKKEWERMKASEKIIYVYKKRKYEVTLST
392	SSX ortho/para		A0A2K6KB36	rbie	Rhinopithecus bieti	black-and-white snub-nosed monkey	Primates	108522062 [Gene Symbol: LOC108522062] [Locus Tag: ] [Chromosome: Un] [Map Location: ] [Description: protein SSX4-like] [Gene Type: protein-coding]	MNGDNTFARRPRNDAQISEKIQKAFDDIAKYFSKKEWEKMKASEKIIYVYMKINYEVMTKLGFKVTLPPFMCSEPAADFHGNDFDNDRNRGNQVERPQTTFGRLQRIFPKIMPKKPAEKENDSKQVAEASGPRNCGKQPCPPGKPSSSEKINKTSGPKRGKHTWTHRLRERKQPVIYEEISDPEEDDE			PF01352 [KRAB]	PF09514 [SSXRD]			1/1:22:61	6.5e-07	QKAFDDIAKYFSKKEWEKMKASEKIIYVYMKINYEVMTKL	1/1:24:61	1.1e-15	AFDDIAKYFSKKEWEKMKASEKIIYVYMKINYEVMTKL	1/1:24:61	1.4e-23	AFDDIAKYFSKKEWEKMKASEKIIYVYMKINYEVMTKL	1/1:24:61	1.3e-09	AFDDIAKYFSKKEWEKMKASEKIIYVYMKINYEVMTKL	1/1:24:61	2.6e-23	AFDDIAKYFSKKEWEKMKASEKIIYVYMKINYEVMTKL
393	SSX ortho/para		A0A2K6MQ50	rbie	Rhinopithecus bieti	black-and-white snub-nosed monkey	Primates	108524300 [Gene Symbol: LOC108524300] [Locus Tag: ] [Chromosome: Un] [Map Location: ] [Description: protein SSX7-like] [Gene Type: protein-coding]	MDGDDAFARRPRAGAQIPEKIQKAFDDIAKYFSKKEWERMKVSEKIVYVYKKRKYEAMSKLGFKITLPPFMRNKQTTHFQGNDFDNDPNHGNQEMSLILFICDLHIIKIMPEKPAEEGNDSKGVPEASGPQNDGKQLCPPGKPSTSEKINKRSGPKRGKHAWTHRLRERKQLAIYEEISDPEEDDE				PF09514 [SSXRD]			1/1:22:61	2.5e-05	QKAFDDIAKYFSKKEWERMKVSEKIVYVYKKRKYEAMSKL	1/1:24:61	3.7e-13	AFDDIAKYFSKKEWERMKVSEKIVYVYKKRKYEAMSKL	1/1:24:61	1.4e-21	AFDDIAKYFSKKEWERMKVSEKIVYVYKKRKYEAMSKL	1/1:24:61	5.9e-09	AFDDIAKYFSKKEWERMKVSEKIVYVYKKRKYEAMSKL	1/1:24:61	6.7e-22	AFDDIAKYFSKKEWERMKVSEKIVYVYKKRKYEAMSKL
394	SSX ortho/para		A0A2K6KAC4	rbie	Rhinopithecus bieti	black-and-white snub-nosed monkey	Primates	KRAB-related domain-containing protein; SSX1 according to ENSEMBL	MNRDNTFANRPRDDAQTSEKRSKAFDDITKYFSKKEWEKMKYSEKISCVHVKRKYETMTKLGFKVTLPPFMRNKRATDFQGNNIDNDHNRRNEVERPQMTFGRLQRISPKIMPKKPAEEGNDSKGVPEASGPQNDGKQLCPPGKANTSEKINKRSGPKRRKHAWTHRLRERKQLVIYEEISDPEEDDE			PF01352 [KRAB]	PF09514 [SSXRD]			1/1:22:61	5.7e-05	SKAFDDITKYFSKKEWEKMKYSEKISCVHVKRKYETMTKL	1/1:24:61	1.8e-15	AFDDITKYFSKKEWEKMKYSEKISCVHVKRKYETMTKL	1/1:24:61	1.4e-22	AFDDITKYFSKKEWEKMKYSEKISCVHVKRKYETMTKL	1/1:24:61	1.3e-08	AFDDITKYFSKKEWEKMKYSEKISCVHVKRKYETMTKL	1/1:24:61	4e-22	AFDDITKYFSKKEWEKMKYSEKISCVHVKRKYETMTKL
395	SSX ortho/para		A0A2K6LZ48	rbie	Rhinopithecus bieti	black-and-white snub-nosed monkey	Primates	KRAB-related domain-containing protein; SSX5-like according to ENSEMBL	MVIVHTILRFTFKNHPWRQVCDLALHLVTLSPFWKVGRESASSIKALLCGGEKLGKTFDDIAKYFSKKEWEKMKCSERIISVYMKRKYEAMNKLGFKVTLPPFVHNKRAADFQGNDFDNDRNRRNQVERPQMSFGRLQGIFPKIMHNKPAEEGKDSKGVSEASGPQNDGKQLCPPGKANTSEKINKKSSKRKQFGNNHSGFPGYVQVCGLGVWHGSQTSLGPGWAEELAQLQMRC							1/1:55:94	1.6e-05	GKTFDDIAKYFSKKEWEKMKCSERIISVYMKRKYEAMNKL	1/1:57:94	5.6e-11	TFDDIAKYFSKKEWEKMKCSERIISVYMKRKYEAMNKL	1/1:57:94	1.5e-21	TFDDIAKYFSKKEWEKMKCSERIISVYMKRKYEAMNKL	1/1:57:94	1e-07	TFDDIAKYFSKKEWEKMKCSERIISVYMKRKYEAMNKL	1/1:57:94	9.6e-20	TFDDIAKYFSKKEWEKMKCSERIISVYMKRKYEAMNKL
396	SSX ortho/para		A0A2K6PB52	rrox	Rhinopithecus roxellana	golden snub-nosed monkey	Primates	KRAB-related domain-containing protein; SSX3-like according to ENSEMBL	MNRDKDCAKRARDDAQTPEKIQKAFDDIAKYFAKKEWERMKASEKIIYVYKKRKYEVTLSTFMRNKRATDFQRNDSDNDRNRGNQVEHPQMTFGRLQGIFPKIMPKKPAEEGNDWKGVPEASDPQNHGKQLCPPGKPNTSEKINKRSGNREAQEKEERQGRSSQNTHNIHLLRPKRGKHAWTHRLRERKQLVIYEEISDPEEDDE				PF09514 [SSXRD]			1/1:22:62	9.6e-05	QKAFDDIAKYFAKKEWERMKASEKIIYVYKKRKYEVTLSTF	1/1:24:61	7.8e-11	AFDDIAKYFAKKEWERMKASEKIIYVYKKRKYEVTLST	1/1:24:61	3.8e-19	AFDDIAKYFAKKEWERMKASEKIIYVYKKRKYEVTLST	1/1:24:61	1.8e-09	AFDDIAKYFAKKEWERMKASEKIIYVYKKRKYEVTLST	1/1:24:61	4.5e-19	AFDDIAKYFAKKEWERMKASEKIIYVYKKRKYEVTLST
397	SSX ortho/para		A0A2K6NAV3	rrox	Rhinopithecus roxellana	golden snub-nosed monkey	Primates	104660673 [Gene Symbol: LOC104660673] [Locus Tag: ] [Chromosome: 7] [Map Location: ] [Description: protein SSX4-like] [Gene Type: protein-coding]	MNGDNTFARRPRNDAQISEKIQKAFDDIAKYFSKKEWEKMKASEKIIYVYMKINYEVMTKLGFKVTLPPFMCSEPAADFHGNDFDNDRNRGNQVERPQMTSDRLQRVFPKIMPKKPAEKENDSKQVAEASGPRNCGKQPCLPGKPSSSEKINKTSGPKRGKHTWTHRLRERKQPVIYEEISDPEEDDE			PF01352 [KRAB]	PF09514 [SSXRD]			1/1:22:61	6.5e-07	QKAFDDIAKYFSKKEWEKMKASEKIIYVYMKINYEVMTKL	1/1:24:61	1.1e-15	AFDDIAKYFSKKEWEKMKASEKIIYVYMKINYEVMTKL	1/1:24:61	1.4e-23	AFDDIAKYFSKKEWEKMKASEKIIYVYMKINYEVMTKL	1/1:24:61	1.3e-09	AFDDIAKYFSKKEWEKMKASEKIIYVYMKINYEVMTKL	1/1:24:61	2.6e-23	AFDDIAKYFSKKEWEKMKASEKIIYVYMKINYEVMTKL
398	SSX ortho/para		A0A2K6NYA2	rrox	Rhinopithecus roxellana	golden snub-nosed monkey	Primates	KRAB-related domain-containing protein; SSX11-like according to ENSEMBL	MNGDDAFARRPRVGAQITEKIQKAFDDIAKYFSKKEWEKMKCSERIISVYMKRKYEAMNKLGFKVTLPPFMHNTVAADFQGNDSDNDRNHGNQVERPQMTFGRLQGIFPKIMPEKPAKEGNDSKEVPGASGPQNDGKQLCPPGKPSTSKKINKRSGPKRGKHAWTHRLRKRKQLVIYEEISDPEDDE				PF09514 [SSXRD]			1/1:22:61	2e-05	QKAFDDIAKYFSKKEWEKMKCSERIISVYMKRKYEAMNKL	1/1:24:61	3.4e-11	AFDDIAKYFSKKEWEKMKCSERIISVYMKRKYEAMNKL	1/1:24:61	4.9e-22	AFDDIAKYFSKKEWEKMKCSERIISVYMKRKYEAMNKL	1/1:24:61	2.1e-07	AFDDIAKYFSKKEWEKMKCSERIISVYMKRKYEAMNKL	1/1:24:61	8.4e-20	AFDDIAKYFSKKEWEKMKCSERIISVYMKRKYEAMNKL
399	SSX ortho/para		A0A2K6P5W7	rrox	Rhinopithecus roxellana	golden snub-nosed monkey	Primates	104668564 [Gene Symbol: LOC104668564] [Locus Tag: ] [Chromosome: 7] [Map Location: ] [Description: putative protein SSX8] [Gene Type: protein-coding]	MNGDNAFAKRPRDNAKTSKKRSKAFDDIAKYFSKKEWEKMKYSEKISYVYMKRNYETMTKLGFNVTLPPFMHNKQATDFQGNDSDNDRNRGNQVERPQMTFGRLQRIFPKIIPKKPAEEGNDSKGVPEAPGPQNDGKQLCPPGKANTSEKINKRSGRKRGKHAWTHRLRERKQPVIYEEISDPEEDDE			PF01352 [KRAB]	PF09514 [SSXRD]			1/1:22:61	9.9e-07	SKAFDDIAKYFSKKEWEKMKYSEKISYVYMKRNYETMTKL	1/1:24:61	9.9e-17	AFDDIAKYFSKKEWEKMKYSEKISYVYMKRNYETMTKL	1/1:24:61	9.5e-25	AFDDIAKYFSKKEWEKMKYSEKISYVYMKRNYETMTKL	1/1:24:61	3e-09	AFDDIAKYFSKKEWEKMKYSEKISYVYMKRNYETMTKL	1/1:24:61	7.7e-25	AFDDIAKYFSKKEWEKMKYSEKISYVYMKRNYETMTKL
400	SSX ortho/para		A0A2K6R2T7	rrox	Rhinopithecus roxellana	golden snub-nosed monkey	Primates	KRAB-related domain-containing protein; SSX3-like according to ENSEMBL	MDGDDAFARRPRAGAQIPEKIQKAFDDIAKYFSKKEWERMKVSEKIVYVYKKRKYEAMSKLGFKITLPPFMRNKQTTHFQGNDFDNDPNHGNQVERPQMTSDRLQGVFPKIMPEKPAEEGNDSKGVPEASGPQNDGKQLCPPGKPSTSEKINKRSEKEERWGTAHRWSSQNTRNFGEKHVWTHRLRERKQPVIYEEISDPEEDDE				PF09514 [SSXRD]			1/1:22:61	2.5e-05	QKAFDDIAKYFSKKEWERMKVSEKIVYVYKKRKYEAMSKL	1/1:24:61	3.7e-13	AFDDIAKYFSKKEWERMKVSEKIVYVYKKRKYEAMSKL	1/1:24:61	1.4e-21	AFDDIAKYFSKKEWERMKVSEKIVYVYKKRKYEAMSKL	1/1:24:61	5.9e-09	AFDDIAKYFSKKEWERMKVSEKIVYVYKKRKYEAMSKL	1/1:24:61	6.7e-22	AFDDIAKYFSKKEWERMKVSEKIVYVYKKRKYEAMSKL
401	SSX ortho/para		A0A2K6NAE4	rrox	Rhinopithecus roxellana	golden snub-nosed monkey	Primates	104675814 [Gene Symbol: LOC104675814] [Locus Tag: ] [Chromosome: 7] [Map Location: ] [Description: putative protein SSX6] [Gene Type: protein-coding]	MNRDNTFANRPRDDAQTSEKRSKAFDDITKYFSKKEWEKMKYSEKISCVHVKRKYETMTKLGFKVTLPPFMRNKRATDFQGNNIDNDHNRRNEVERPQMTFGRLQGIIPKIMPKKPAEEGNDSKGVPEASGPQNDGKQLCPPGKANTSEKINKRSGPKRRKHAWTHRLRERKQLVIYEEISDPEEDDE				PF09514 [SSXRD]			1/1:22:61	5.7e-05	SKAFDDITKYFSKKEWEKMKYSEKISCVHVKRKYETMTKL	1/1:24:61	1.8e-15	AFDDITKYFSKKEWEKMKYSEKISCVHVKRKYETMTKL	1/1:24:61	1.4e-22	AFDDITKYFSKKEWEKMKYSEKISCVHVKRKYETMTKL	1/1:24:61	1.3e-08	AFDDITKYFSKKEWEKMKYSEKISCVHVKRKYETMTKL	1/1:24:61	4e-22	AFDDITKYFSKKEWEKMKYSEKISCVHVKRKYETMTKL
402	SSX ortho/para		A0A2K6Q116	rrox	Rhinopithecus roxellana	golden snub-nosed monkey	Primates	KRAB-related domain-containing protein; SSX3-like according to ENSEMBL	MNSDDTFARRPNVGAQIPEKIQKAFDGFSKKEWEKMKYSEKIISVYMKRKYEAMTKLGFRVTLPPFMHNKRVVDFQRNDFDNDCKHGNQVERPQMSFGMLQGIFPKIMPKKPAPAEEGNDSKGVSEASGPKNDGKQLCPPGKANASEKTNKRSGPKAGKHAWTHRLRERKQLVIYEEISDPEEDDE				PF09514 [SSXRD]			1/1:18:57	0.004	PEKIQKAFDGFSKKEWEKMKYSEKIISVYMKRKYEAMTKL	1/1:24:57	1.1e-05	AFDGFSKKEWEKMKYSEKIISVYMKRKYEAMTKL	1/1:20:57	1.3e-17	KIQKAFDGFSKKEWEKMKYSEKIISVYMKRKYEAMTKL	1/1:20:57	0.0018	KIQKAFDGFSKKEWEKMKYSEKIISVYMKRKYEAMTKL	1/1:24:57	2.8e-14	AFDGFSKKEWEKMKYSEKIISVYMKRKYEAMTKL
403	SSX ortho/para		A0A2K6P620	rrox	Rhinopithecus roxellana	golden snub-nosed monkey	Primates	KRAB-related domain-containing protein; putative SSX6 according to ENSEMBL	MNRDNAFAKRPRDGAKTSKKRSKDFDDIAKYFSKKEWEKMKFSEKISCVHMKRKYEAMTKLGSNVTLPPFMRNKQATDFQGNDSDDDRNRGNQVERPQTTFGRLQRIFPKIMLKKLAEEGNHSKGVAEASGPQNDGKQLCPPGKPSTSEKINKRSGKRKQFRNNPSAILSVIT							1/1:22:61	6.4e-05	SKDFDDIAKYFSKKEWEKMKFSEKISCVHMKRKYEAMTKL	1/1:24:61	8.2e-16	DFDDIAKYFSKKEWEKMKFSEKISCVHMKRKYEAMTKL	1/1:24:61	1.6e-22	DFDDIAKYFSKKEWEKMKFSEKISCVHMKRKYEAMTKL	1/1:24:61	6.5e-08	DFDDIAKYFSKKEWEKMKFSEKISCVHMKRKYEAMTKL	1/1:24:61	1.6e-21	DFDDIAKYFSKKEWEKMKFSEKISCVHMKRKYEAMTKL
404	SSX ortho/para		A0A2K6PNW8	rrox	Rhinopithecus roxellana	golden snub-nosed monkey; SSX7-like according to ENSEMBL	Primates	KRAB-related domain-containing protein	MNGDDAFARRPRVGAQIPEKIHKPFDDIAQYFSKKEWEKMKASEKIIYVYMKRKYEAMTKLGFKVTLPPFMRNKRATDFQGNDSDNDRNHGNQVERPQMTFSMLQGIFPKITPKKPAEEGNDSKGVPEASGPQNDGKQLCPPGKPSTSEKINATSGLKRGKHAWTHRLCERKQLAIYEEISDPEDDE				PF09514 [SSXRD]			1/1:22:61	3.2e-06	HKPFDDIAQYFSKKEWEKMKASEKIIYVYMKRKYEAMTKL	1/1:24:61	8.9e-16	PFDDIAQYFSKKEWEKMKASEKIIYVYMKRKYEAMTKL	1/1:24:61	8.2e-24	PFDDIAQYFSKKEWEKMKASEKIIYVYMKRKYEAMTKL	1/1:24:61	5.5e-10	PFDDIAQYFSKKEWEKMKASEKIIYVYMKRKYEAMTKL	1/1:24:61	1.2e-23	PFDDIAQYFSKKEWEKMKASEKIIYVYMKRKYEAMTKL
405	SSX ortho/para		13446665_SBOLI	sbol	Saimiri boliviensis	Bolivian squirrel monkey	Primates		MNGDDSSAKKPGDEEQISESKRKAFDDIAQYFSKNEWEKLQYSQKITYVYMKRNYEAMSRLGFQVTVPLFMRNKQAKDIQEDDSDRDSNPGNLEMPLILFIHDLHITKIMPRDPPKEEENHSEAVPATSGAQNDVKLLCYPQCTPMYSAKPSTPEKINKITAPKRAKHAWSHRLRERKNLVTYEEISDPEEDDE		IPR003655 [KRAB-related]	IPR001909 [KRAB]	IPR019041 [SSXRD]			1/1:22:61	1.9e-07	RKAFDDIAQYFSKNEWEKLQYSQKITYVYMKRNYEAMSRL	1/1:24:61	2.2e-15	AFDDIAQYFSKNEWEKLQYSQKITYVYMKRNYEAMSRL	1/1:24:61	6.7e-24	AFDDIAQYFSKNEWEKLQYSQKITYVYMKRNYEAMSRL	1/1:24:61	1.2e-09	AFDDIAQYFSKNEWEKLQYSQKITYVYMKRNYEAMSRL	1/1:24:61	5.3e-25	AFDDIAQYFSKNEWEKLQYSQKITYVYMKRNYEAMSRL
406	SSX ortho/para		13133399_SBOLI	sbol	Saimiri boliviensis	Bolivian squirrel monkey	Primates		MNDDSTFAEXPRDDAQVSKKGHKAFNDTVRYFSKKNREKLKNSEKITYVCMKRNYETMTKLGLKATLPTFMYNKWATDLQGNDSDRHHNCGNQDEHTQMAFSMLQGNFPKMMPKKPAEEGNYSKGVPEAYVSQNDGKQLCPPGKQSTSEKIHKXIWTHRVRERKYLVIYEEISHPEEDEE		IPR003655 [KRAB-related]		IPR019041 [SSXRD]			1/1:22:61	0.00012	HKAFNDTVRYFSKKNREKLKNSEKITYVCMKRNYETMTKL	1/1:24:61	9.5e-11	AFNDTVRYFSKKNREKLKNSEKITYVCMKRNYETMTKL	1/1:24:61	2.3e-20	AFNDTVRYFSKKNREKLKNSEKITYVCMKRNYETMTKL	1/1:24:61	7.1e-07	AFNDTVRYFSKKNREKLKNSEKITYVCMKRNYETMTKL	1/1:24:61	2.4e-19	AFNDTVRYFSKKNREKLKNSEKITYVCMKRNYETMTKL
407	SSX ortho/para		A0A2K6UGD8	sbol	Saimiri boliviensis	Bolivian squirrel monkey	Primates	KRAB-related domain-containing protein	MNGDDSSAKKPGDEEQISESKRKHPWGQVCYLALHLVTLSPFWKVERELASNIEEGLPSPHPAFDDIAQYFSKNEWEKLQYSQKITYVYMKRNYEAMSRLGFQVTVPLFMRNKQAKDIQEDDSDRDSNPGNLGEYMGRAGKGLFKDPPKEEENHSEAVPATSGAQNDVKLLTPEKINKITAPKRAKHAWSHRLRERKNLVTYEEISDPEEDDE			PF01352 [KRAB]	PF09514 [SSXRD]			1/1:61:100	1.6e-07	HPAFDDIAQYFSKNEWEKLQYSQKITYVYMKRNYEAMSRL	1/1:63:100	2.2e-15	AFDDIAQYFSKNEWEKLQYSQKITYVYMKRNYEAMSRL	1/1:63:100	6.7e-24	AFDDIAQYFSKNEWEKLQYSQKITYVYMKRNYEAMSRL	1/1:63:100	1.2e-09	AFDDIAQYFSKNEWEKLQYSQKITYVYMKRNYEAMSRL	1/1:63:100	5.3e-25	AFDDIAQYFSKNEWEKLQYSQKITYVYMKRNYEAMSRL
408	SSX ortho/para		A0A2K6TCX6	sbol	Saimiri boliviensis	Bolivian squirrel monkey	Primates	KRAB-related domain-containing protein	MMTAPLQSPRDDAQVSKKGHKAFNDTVRYFSKKNREKLKNSEKITYVCMKRNYETMTKLGLKATLPTFMYNKWATDLQGNDSDRHHNCGNQDEHTQMAFSMLQGNFPKMMPKKPAEEGNYSKGVPEAYVSQNDGKQLCHSQDIWTHRVRERKYLVIYEEISHPEEDEE				PF09514 [SSXRD]			1/1:20:59	0.00012	HKAFNDTVRYFSKKNREKLKNSEKITYVCMKRNYETMTKL	1/1:22:59	9.5e-11	AFNDTVRYFSKKNREKLKNSEKITYVCMKRNYETMTKL	1/1:22:59	2.3e-20	AFNDTVRYFSKKNREKLKNSEKITYVCMKRNYETMTKL	1/1:22:59	7.1e-07	AFNDTVRYFSKKNREKLKNSEKITYVCMKRNYETMTKL	1/1:22:59	2.4e-19	AFNDTVRYFSKKNREKLKNSEKITYVCMKRNYETMTKL
409	SSX ortho/para		A0A1U7T0D1	tsyr	Tarsius syrichta	Philippine tarsier	Primates	103250518 [Gene Symbol: LOC103250518] [Locus Tag: ] [Chromosome: Un] [Map Location: ] [Description: putative protein SSX6] [Gene Type: protein-coding]	MNIDSSFAKSPREVIQNSKNCKAFKDISKYFSRKEWGKLRYSEKITYVYMKRNYKTMTNLGLRATLPAFMRSDRQATESQRKDSDEDRNHGNQGEPPQKASRVQQRKRLKMMPKKPAREGNGSKGVPGTPGSEQTQRQLCTPGKASTFGQQNEKTSEPKKWGKHVWTHRLRERRNLVVYEEISDPEEDD			PF01352 [KRAB]	PF09514 [SSXRD]			1/1:21:60	1.1e-06	CKAFKDISKYFSRKEWGKLRYSEKITYVYMKRNYKTMTNL	1/1:23:60	1.1e-16	AFKDISKYFSRKEWGKLRYSEKITYVYMKRNYKTMTNL	1/1:23:60	1.1e-23	AFKDISKYFSRKEWGKLRYSEKITYVYMKRNYKTMTNL	1/1:23:60	2.9e-09	AFKDISKYFSRKEWGKLRYSEKITYVYMKRNYKTMTNL	1/1:23:60	1.5e-24	AFKDISKYFSRKEWGKLRYSEKITYVYMKRNYKTMTNL
410	lcha ZNF		AFYH01282557.1(1199-2718;-)	lcha	Latimeria chalumnae	Coelacanth	Sarcopterygii (lobe-finned fishes)		LLQEATGSSHKMMDMMPEEEEMGVVLVVKTESISEGDCGKNEEETQNRIISPGQPEMEKTFEDIEMYFSKGEWEELQDWEKEVYRDIKEHYDVVVSFGYDVPKPDFMSEVEDTQQFSVYELPYGTEDESPLSEDSLFGDAIKYTSNTSSPIHPFCNKAALEDFKIKQVRESAQQSVVETFESNVQSNENSTLYDGSMSEKGFGQSPKLKVEYHSITGEEPHSCLECGEGFCHLTHFNNHTEQKPYLCEEFGECFRLPKHLDRCQQFHMEEKPYKCTECGKNFQRSHHLIGHRQVHTGEKLYKCTECGKSFTQKGNLKTHQRIHTGEKPYKCTECGISFQRSHHLVRHRQVHTGEKQYKCIECGKGFTQKESLKTHQQTHTGEKPYKCTECGNGFHRSHH…							1/1:1:40	4.4e-10	EKTFEDIEMYFSKGEWEELQDWEKEVYRDIKEHYDVVVSF	1/1:3:40	2.7e-17	TFEDIEMYFSKGEWEELQDWEKEVYRDIKEHYDVVVSF	1/1:3:40	1.7e-11	TFEDIEMYFSKGEWEELQDWEKEVYRDIKEHYDVVVSF	1/1:3:40	4.5e-24	TFEDIEMYFSKGEWEELQDWEKEVYRDIKEHYDVVVSF	1/1:3:40	1.4e-28	TFEDIEMYFSKGEWEELQDWEKEVYRDIKEHYDVVVSF
411	lcha ZNF		AFYH01284271.1(2082-2649;+)	lcha	Latimeria chalumnae	Coelacanth	Sarcopterygii (lobe-finned fishes)		RISLHRRMEIPQQKEETDMILVQTKPVWKSTSINNQEESKKIPVNPDQLQTENTFEEIEKYFTKDEWVELQDWEKEVYRSLKEHYDTIVSFGYKFPKPDFMIEVKVKNLNPVCESTQRKTADSPTLPDINMVSEGTESPFIVSYNTDSINTGNKIKILKTKQKKSNHQRCAVQEFEEKGSVQKKEDSFYYCSVCQERFISLEKIQNHWQFQQTSSSESTGCRKYSSDLVHSSHEKEQFGEGKDIPQPPYLKGKLQGEDQLGMKQYNYTDGNGRAEQNFQHGQVSRIEKQHKTTDCGKSSVYSPAFNTHIQINKGEQKCVCTECGKNFRDSAALNTHIRVHTGEKSYKCTECGKIFKDSLTLNIHSRIHTGEKSYKCKECGKSFGYKSSLNTHIRIHTGE…							1/1:1:40	1.3e-06	ENTFEEIEKYFTKDEWVELQDWEKEVYRSLKEHYDTIVSF	1/1:3:40	1.6e-15	TFEEIEKYFTKDEWVELQDWEKEVYRSLKEHYDTIVSF	1/1:3:40	3.3e-11	TFEEIEKYFTKDEWVELQDWEKEVYRSLKEHYDTIVSF	1/1:3:40	3.7e-23	TFEEIEKYFTKDEWVELQDWEKEVYRSLKEHYDTIVSF	1/1:3:40	2.4e-27	TFEEIEKYFTKDEWVELQDWEKEVYRSLKEHYDTIVSF
412	lcha ZNF		AFYH01286234.1(259-910;-)	lcha	Latimeria chalumnae	Coelacanth	Sarcopterygii (lobe-finned fishes)		VCVCTYVRAHSFALNIFITVSFQVWVLNLCFCGFFFFFSETISHRMMENLLQDEDSDVVFVSKSEPVHKGTEASSQEEVEDMTPPPHHSNTNKDIEMYFSKAEWEQLQDWQKGVYKSIKDNYEKFISLGYDIPKPDFMTKIEEIHKRTISETTDSTEEESPLSTNSISKMAEPPSNTQPSNEKPVLEEPGETQEMDKNHQFEAEASEETVLEENKEDDLSPEGKTTHQPIHPLEKLYKCTECGKSFYWSSHLSRHQQTHTGEKPYKCTVCGKSFSRLTNLNTHERIHTGERPYNCTLCGKSFRQLANLDRHQRTHTGEKPYECLECGKSFSHLANLNIHQRVHTGEKPYKCTECGKSFCVSSNLNRHKQIHTIEAEYICTECGKSFSQSAYLIRHQQIH…							1/1:1:40	3.1e-10	SNTNKDIEMYFSKAEWEQLQDWQKGVYKSIKDNYEKFISL	1/1:3:40	1.4e-16	TNKDIEMYFSKAEWEQLQDWQKGVYKSIKDNYEKFISL	1/1:3:40	2.2e-11	TNKDIEMYFSKAEWEQLQDWQKGVYKSIKDNYEKFISL	1/1:3:40	1.8e-17	TNKDIEMYFSKAEWEQLQDWQKGVYKSIKDNYEKFISL	1/1:3:40	1.3e-21	TNKDIEMYFSKAEWEQLQDWQKGVYKSIKDNYEKFISL
413	lcha ZNF		JH126786.1(628859-630115;-)	lcha	Latimeria chalumnae	Coelacanth	Sarcopterygii (lobe-finned fishes)		LLNYCRNHQRIGFHRTMETPQQEEEIDVFIVKTEPVWETASVCNQEETREIPVTPNQLEMDSKFKDLEIYFTKEEWTGLQDWEKEVYRNLKEHYDTIISFGYEFPKPDFMTEIKETHQLPVCEVSHGEVSESPMQTETDTINNETESPFSLSSGTEPIKGNTKVEQREETQKKGTIQWWVVQVFEEKRLVQNKEDGFYYCSICQERFDSLEKLQSHWQVQQNSSSESSEGRRSCSDIINSLHQKDESGGEKGSLQSQCLKGKIHGVDLPGMMHCNYTDGQGYAQLPFQHRQVPKVEKQHICTECGKNFRRASNLNAHQRIHMGEKPYQCAECGKSFRWTSNLNIHLRIHMGEKPYQCAACGKNFRHLSNLNSHQPVHTGEKRYKCTECGKCFSRSSDLS…							1/1:1:40	6.5e-09	DSKFKDLEIYFTKEEWTGLQDWEKEVYRNLKEHYDTIISF	1/1:3:40	4.5e-18	KFKDLEIYFTKEEWTGLQDWEKEVYRNLKEHYDTIISF	1/1:3:40	2.4e-10	KFKDLEIYFTKEEWTGLQDWEKEVYRNLKEHYDTIISF	1/1:3:40	1.3e-22	KFKDLEIYFTKEEWTGLQDWEKEVYRNLKEHYDTIISF	1/1:3:40	5e-27	KFKDLEIYFTKEEWTGLQDWEKEVYRNLKEHYDTIISF
414	lcha ZNF		JH126786.1(661963-662950;-)	lcha	Latimeria chalumnae	Coelacanth	Sarcopterygii (lobe-finned fishes)		IVFYFPENHKRMETLNQVEKPDVLLLSDQVWESAYTSNQEEIRSIPVNPAQLEIKNSFQEIENFFSKDEWAELQDWEKEVYRTIKEHYDIIISFGYEFPKPDFMNEVKERKALLVWNSTLSKEDVPPLLPQTTMLNNSNGSLLNTPSSSQPIITINSEKQSDNMQSIESTQQCGVQVFQEMRAMQVNEETDCHCSEHEESYKHLENFNKDFKTHQKDYNAGSTGSVKSGSHFFHDLPHREETYNQEESVKRKMESVNQPIRTGVKQHNCTEGQQHSSSLTLAKREQQVYKGEKPYKYIKSGKNFNTSSNLHANKETYKREKKCKCTECGKSFSKLSHLSTHQRIHTGEKPYKCTECGKSFTQISNLNTHQRLHTGQKPYKCTECGKSFSKLSHLYNHQQ…							1/1:1:40	6.4e-06	KNSFQEIENFFSKDEWAELQDWEKEVYRTIKEHYDIIISF	1/1:3:40	2.9e-14	SFQEIENFFSKDEWAELQDWEKEVYRTIKEHYDIIISF	1/1:3:40	7.2e-11	SFQEIENFFSKDEWAELQDWEKEVYRTIKEHYDIIISF	1/1:3:40	1.5e-22	SFQEIENFFSKDEWAELQDWEKEVYRTIKEHYDIIISF	1/1:3:40	3.9e-26	SFQEIENFFSKDEWAELQDWEKEVYRTIKEHYDIIISF
415	lcha ZNF		JH126786.1(668710-669697;-)	lcha	Latimeria chalumnae	Coelacanth	Sarcopterygii (lobe-finned fishes)		LGNCLFSNFWTHFAKWYEKCFINSAVLFYLGSRRTMETLLQEEEKDVQFLKTESVWESAYTSNQEEIRSIPVNPAQLEIKNSFQEIENFFSKDEWAELQDWEKEVYRTIKEHYDIIIAFGYEFPKPDFMNEVKERKALLVWNSTLSKEDVPPLLPQTTMLNNSNGSLLNTPCSSQPIITVNSEKQSDNMQSIESTQQCGVQVFQEMRATQVNEETDCHCSEHEESYKHLENFNKDFKTHQKDYNAGSTGSVKSGSHLLHDLPHREETYNQEESVKRKMESVDQPIRTGVKQHNCTEGQQHSSSLTLAKREQQVHKGEKPYKCTECGKNFRNSSTLIIHKRIHTGEKPYKCTECGKSFTQISHLNNHQRIHTGEKPYKCTDCGVSFSRLSHLYSHQRIHT…							1/1:1:40	1.4e-05	KNSFQEIENFFSKDEWAELQDWEKEVYRTIKEHYDIIIAF	1/1:3:40	2.5e-14	SFQEIENFFSKDEWAELQDWEKEVYRTIKEHYDIIIAF	1/1:3:40	8.9e-11	SFQEIENFFSKDEWAELQDWEKEVYRTIKEHYDIIIAF	1/1:3:40	4.6e-22	SFQEIENFFSKDEWAELQDWEKEVYRTIKEHYDIIIAF	1/1:3:40	1.1e-25	SFQEIENFFSKDEWAELQDWEKEVYRTIKEHYDIIIAF
416	lcha ZNF		JH126786.1(676277-677606;-)	lcha	Latimeria chalumnae	Coelacanth	Sarcopterygii (lobe-finned fishes)		STLRCGICERCFINLLFCIGSHSTMETQFQEKETDVLHLKAEPVWETTCGRNQEERRFIPVNPDQLEVENTFKDIEKYFSKDEWADLKDWEKEVYRTIKEHYDTVTSFGCHFPKPDFMSEVKESHQFPVGDSTCSKEDDSSILYEINKDNNSNKFLLDIPSRAQPKTAISVKKLSDEIQTAERMQNCAVQKFEEMSTVQSLEENLYHCSECEKSYNCLENFSQHLQAHKKECNDHTGSVKISTQLIHDIPHREERENQQDCLKGPMNIEHHPVQIEGKQYKCQQQIRKGKKHHKCIECGKSFTNSSNLKTHQRIHTGEKPYKCKECGKCFTQVSNLYTHNRVHTGEKPYKCTECGKSFSKISHLCSHQRLHTGERPYKCTECGISFRQLSDLNRHHRIH…							1/1:1:40	1.5e-07	ENTFKDIEKYFSKDEWADLKDWEKEVYRTIKEHYDTVTSF	1/1:3:40	4.8e-16	TFKDIEKYFSKDEWADLKDWEKEVYRTIKEHYDTVTSF	1/1:3:40	4.7e-14	TFKDIEKYFSKDEWADLKDWEKEVYRTIKEHYDTVTSF	1/1:3:40	9.4e-22	TFKDIEKYFSKDEWADLKDWEKEVYRTIKEHYDTVTSF	1/1:3:40	3.9e-27	TFKDIEKYFSKDEWADLKDWEKEVYRTIKEHYDTVTSF
417	lcha ZNF		JH126786.1(688390-689455;-)	lcha	Latimeria chalumnae	Coelacanth	Sarcopterygii (lobe-finned fishes)		STLGCGICERCFINLLFCIGSRITMETQFQEKETDVLHLKAEPVWETTCGRIQEERRFIPVNPDQLKLENTFKDIEKYFSKDEWADLQDWEKEVYRTIKEHYDTVISFGYNFPKPDFMSEVKEFHQFPVGDSTCSKEDDSSILYEINKDNNSNKFLLDIPSRAQPKTAISVKKLSDEIQTAERMQNCAVQKFEEMSTVQSLEENLYHCSECEKSYNCLENFSQHLQAHKKECNDHTGSVKNSTQLIHDIPHREERENQQDCLKGPVNIEHHSVQIEGKQYKCQQQIRKGEKPHKCIECGKNFTNSSNLRTHQRIHTGQKPCKCKECGKCFTQVTNLYTHQRIHTGEKPYKCTECGMNFRQLSDLNRHQRIHTGEKKYKCTECGKSFRNSSCLTNHQRIH…							1/1:1:40	1.3e-07	ENTFKDIEKYFSKDEWADLQDWEKEVYRTIKEHYDTVISF	1/1:3:40	5.5e-17	TFKDIEKYFSKDEWADLQDWEKEVYRTIKEHYDTVISF	1/1:3:40	3.6e-13	TFKDIEKYFSKDEWADLQDWEKEVYRTIKEHYDTVISF	1/1:3:40	4.5e-23	TFKDIEKYFSKDEWADLQDWEKEVYRTIKEHYDTVISF	1/1:3:40	3.7e-28	TFKDIEKYFSKDEWADLQDWEKEVYRTIKEHYDTVISF
418	lcha ZNF		JH126786.1(713162-714875;-)	lcha	Latimeria chalumnae	Coelacanth	Sarcopterygii (lobe-finned fishes)		IIAGSNRKATMDTLLKEKWTDVLHLKTEPVWENTSASIPVEIRVIQANPDQFELETTFKDIEMYFTKDEWTGLQDWEKEVYMTIKEHYDTIISFGYQFPKPDFMVDIMEIHQLPMCDSTQNKEDVSSIWCEINIDNHSIKSPLIISSGIQPTHADIITDRLEGKENTENTQQCRVQACKETSGGENNKEAHCSECGESCDCLQNFSQHLKIDSNRYKNCTKSVRNSSQIIHIIPHRDKRYNQQEHLKGKIGNRHQPIPKDLKQSDCTEAQQSFGPMPFPKGQQQFHSGDKSCKSIECRNSLNNLSNLKGHPKTATKQKTFHCMECGKSFASSSLLNVHKKIHTGERKYKCIQCGKSFTQISSLYTHQRIHTGEKPYKCTECGKSFSNLSNIKTHRRIHT…							1/1:1:40	3.6e-08	ETTFKDIEMYFTKDEWTGLQDWEKEVYMTIKEHYDTIISF	1/1:3:40	2.1e-14	TFKDIEMYFTKDEWTGLQDWEKEVYMTIKEHYDTIISF	1/1:3:40	6.9e-12	TFKDIEMYFTKDEWTGLQDWEKEVYMTIKEHYDTIISF	1/1:3:40	9.7e-24	TFKDIEMYFTKDEWTGLQDWEKEVYMTIKEHYDTIISF	1/1:3:40	2.4e-27	TFKDIEMYFTKDEWTGLQDWEKEVYMTIKEHYDTIISF
419	lcha ZNF		JH126786.1(720656-722621;-)	lcha	Latimeria chalumnae	Coelacanth	Sarcopterygii (lobe-finned fishes)		CTYDLNYFRKQQKNNKQRIMEMLLQEEESNAPFRICEITSASIPVEIREIPANPDQLQTESTFKDIKKYFSKDEWVELQDWEKEVYLTIKEHYDTIILFGYQFPKPDFMNEVKEIHQLPLYESVVSKEDEYLVLCETNIINNSTESPSSVCTDVQPSHANTVMEQSGGKENAENAQQCRAQACEEMRPIQSNEENFYRCFECEESFHCLERFCQHLEFHQKERNQQECLKGLMESVQQPIQYYHCTNTQHFCGYLPFKCKRKQLHRGEKPYKCTECGKSFSNSSNLKTHQRIHTGEKPYNCTECGKSFRKRSNLKRHEQIHTGEKPYKCPECGKCFNQKSILSKHQATHTKEKVFQCTDCEKSFNSSSHLNLHQLTHTGEKKYKCTECKKSFTHISHLY…							1/1:1:40	4.9e-06	ESTFKDIKKYFSKDEWVELQDWEKEVYLTIKEHYDTIILF	1/1:3:40	1.2e-15	TFKDIKKYFSKDEWVELQDWEKEVYLTIKEHYDTIILF	1/1:3:40	1.2e-12	TFKDIKKYFSKDEWVELQDWEKEVYLTIKEHYDTIILF	1/1:3:40	1.1e-21	TFKDIKKYFSKDEWVELQDWEKEVYLTIKEHYDTIILF	1/1:3:40	1.5e-26	TFKDIKKYFSKDEWVELQDWEKEVYLTIKEHYDTIILF
420	lcha ZNF		JH126786.1(777946-779500;-)	lcha	Latimeria chalumnae	Coelacanth	Sarcopterygii (lobe-finned fishes)		STMETQLQVERMHKIFVIQTEPVWESANTSNQEEIRERPANADQLERENTFKDIEIFFTKDKWAELQDWEKEVYRSLKEHYDTIISFGYQFPKPDFMTELKETHQLPVCDSTLSKEESLVLPQINRVNHSIKFPLSSSSDSHSLPTNTVQEQSGRKKNRGITQRCRVEAFKETSAVQSTGETLYHCPECGEYYNCLENLESHLELHHGKKNQCGESVQNSSHLIHVSPWLEEPRGGERENQCAYLNGTMKCFHQPLPREEKQCDCVKDQQLCDPAPFQQRQQLWIADQAHQCTECGKSFLKWSNPNQHQKAHREQKPYICTECGKSFPHFAALDGHQQLHAVTKVHKCTECGKSFTKSSNLKRHQQTHTGEKLHKCTDCGKSFTQLSSLNRHQHIHTGE…							1/1:1:40	6.5e-07	ENTFKDIEIFFTKDKWAELQDWEKEVYRSLKEHYDTIISF	1/1:3:40	2.4e-17	TFKDIEIFFTKDKWAELQDWEKEVYRSLKEHYDTIISF	1/1:3:40	9.6e-10	TFKDIEIFFTKDKWAELQDWEKEVYRSLKEHYDTIISF	1/1:3:40	1.4e-23	TFKDIEIFFTKDKWAELQDWEKEVYRSLKEHYDTIISF	1/1:3:40	1.2e-27	TFKDIEIFFTKDKWAELQDWEKEVYRSLKEHYDTIISF
421	lcha ZNF		JH126786.1(798844-801099;-)	lcha	Latimeria chalumnae	Coelacanth	Sarcopterygii (lobe-finned fishes)		ILQLNCCRKQKYKELPQGGRAAPSGRRDRCSLCCWNRSVWRKQGNFSNQEEIKAMAVSAPLKTEPVWKTDTISNQESSDILVNPDQLQMDNTFEDIEKYFAKDEWAELQDWEKEVYRSLREHYDAIISFGYNFPKPDFMTEVKENYQLPVCDSTHNQEDESPIKPVTNTTNNSRQSPLHMFFNNKPFHAKAVLKPLGNIQETENSQQCVVQTSKELKTVQSNKETFYNCAECKENYNCLVKLKRHLEINQRLYNDLLEKLQRHLEHQQSKYTYCLDKLQKHLEVHQRKNNPGRSSEKNSSCLSPDSLSKEEHREERMWTQRPNLKGMKDHLQQRHQTEEKKYHCAERQQVCVPSPFQQEQQQVPTEKKLYKCTECVKCFPQLSALNAHWKIHTREEKHK…							1/1:1:40	1.1e-06	DNTFEDIEKYFAKDEWAELQDWEKEVYRSLREHYDAIISF	1/1:3:40	8.9e-16	TFEDIEKYFAKDEWAELQDWEKEVYRSLREHYDAIISF	1/1:3:40	7e-12	TFEDIEKYFAKDEWAELQDWEKEVYRSLREHYDAIISF	1/1:3:40	4.2e-23	TFEDIEKYFAKDEWAELQDWEKEVYRSLREHYDAIISF	1/1:3:40	1.8e-27	TFEDIEKYFAKDEWAELQDWEKEVYRSLREHYDAIISF
422	lcha ZNF		JH126786.1(815882-817434;-)	lcha	Latimeria chalumnae	Coelacanth	Sarcopterygii (lobe-finned fishes)		LNCCRKQKYKELTQGGRAAPSGRRDRYSLCCRNRSVWGKQGNFSNQQETKAMAVSAPLKTEPVWKTDTISNQETSDILVNLDQLQMDNTFEDIEKYFTKDEWAELQDWEKEVYRSLKEHYEAIISFGYIKFPKPDFMTEVKENYQLPAYDSTHSQEDESPIKPVTNTMNNSRQSPLHVSFNNQTFHAKAVLKWLENIQETENSQQCVVQTSKELKTVQSNKETFYNCAECKENYNCLVNLKKHLEINQRLYNDFLEKLQQHLEHQQSKYNYCLDKLQKHLEVHQSKNNPGRSSEKNSSCLSPDSLSKEEHREERMWTQHPNLKGRKDHLQQRHQTEEKKYHCTEGQQVWVLLPFQQEQQQVPTEKKLYKCMECVKCFPQLSALNTHRKTHTREVKHKCM…							1/1:1:40	1.6e-07	DNTFEDIEKYFTKDEWAELQDWEKEVYRSLKEHYEAIISF	1/1:3:40	5.3e-18	TFEDIEKYFTKDEWAELQDWEKEVYRSLKEHYEAIISF	1/1:3:40	1.1e-12	TFEDIEKYFTKDEWAELQDWEKEVYRSLKEHYEAIISF	1/1:3:40	3.3e-23	TFEDIEKYFTKDEWAELQDWEKEVYRSLKEHYEAIISF	1/1:3:40	8.7e-29	TFEDIEKYFTKDEWAELQDWEKEVYRSLKEHYEAIISF
423	lcha ZNF		JH126786.1(868527-869853;-)	lcha	Latimeria chalumnae	Coelacanth	Sarcopterygii (lobe-finned fishes)		KKRDLLPVDWTEPVWKPTRINHQQKTRQMPTNSDQLEMEAMFEEIKIYFTKDEWVELQDWEKEVYRDIKEHYDTIVSFGYECPKPDFMAEAKKTQQLPVCELNHSQGDKSLLKIPRGYLMDEMDSLNQSIQAGKEQYDCTNRQSSAQLPFQLGHNMGENKYPCTESGKCFRWASNLHTHHQIHVGEKPYNCTECGKSFKHLSNLNAHQPVHTGEKPYKCIECGKSFRWASNLNVHQQIHLGEKLYKCTECGKSFHFLGNLNKHQQLHTGEKTYKCIECGKSFRWASGLYSHLPIHAIEKPYKCTECGKSFSQSANYVVHQRIHTGEEPYKCRECGKSFRRSSDLTVHQHIHTGEKLCKCTDCEKSFSQLSDLHAHRRIHTGEQPFKCTTCGKSFSRSSN…							1/1:1:40	2.1e-09	EAMFEEIKIYFTKDEWVELQDWEKEVYRDIKEHYDTIVSF	1/1:3:40	8.7e-17	MFEEIKIYFTKDEWVELQDWEKEVYRDIKEHYDTIVSF	1/1:3:40	3.1e-09	MFEEIKIYFTKDEWVELQDWEKEVYRDIKEHYDTIVSF	1/1:3:40	1.7e-23	MFEEIKIYFTKDEWVELQDWEKEVYRDIKEHYDTIVSF	1/1:3:40	4e-27	MFEEIKIYFTKDEWVELQDWEKEVYRDIKEHYDTIVSF
424	lcha ZNF		JH126786.1(954282-955353;-)	lcha	Latimeria chalumnae	Coelacanth	Sarcopterygii (lobe-finned fishes)		LLENESIWETASFGIHEEIKEMSANPDQLEMENTFKDIEMFFTKDEWLELQNWEKEVYKDIKEHYDIIISFGYQFPKPDFMTERIPQYPVCESTPCKNCSDCEKSYISLENLKGRLEIQDRKYSYCAASTRNSGHLIRILHQQEESRTKERENQHECLNDRIDCECNPFQAVEKQYDCHKDQQLCDSLSFKQGHQQVYTGKKTYKYTEAGKSYSNSSDLKKHQQHYSGEKPYECKECGKPFLTSLALNAHQRIHAAEALYRCTECGKRFRKSSNLKRHQHIHTGKKPYKCTECGKSFSQSSSLRTHHQIHTGEPMYLCTDCGKSFKNVSIFIKHKHIHIGEHPHKCADCGKGFRKSSNLKRHQQIHTGEKPHKCMECGKSFSQASSLNIHQRIHTGEKP…							1/1:1:40	2e-07	ENTFKDIEMFFTKDEWLELQNWEKEVYKDIKEHYDIIISF	1/1:3:40	1.5e-14	TFKDIEMFFTKDEWLELQNWEKEVYKDIKEHYDIIISF	1/1:3:40	2.9e-09	TFKDIEMFFTKDEWLELQNWEKEVYKDIKEHYDIIISF	1/1:3:40	1.2e-23	TFKDIEMFFTKDEWLELQNWEKEVYKDIKEHYDIIISF	1/1:3:40	2e-26	TFKDIEMFFTKDEWLELQNWEKEVYKDIKEHYDIIISF
425	lcha ZNF		JH126786.1(1050048-1051194;+)	lcha	Latimeria chalumnae	Coelacanth	Sarcopterygii (lobe-finned fishes)		IIAGKQQRSRNHRIMETPLQEEEVDNLAVKTEPAWKPASVSNQDETRDTLANPDQLEVENTFEDIEKFFTKDEWVELQDWEKEVYLTIKEHYDTIISFGYQFPKPDFMTELKRTQQLPVCESIFSKEEDSLVLYEISMVNNSFKSFLSISSDVQSIQANVVLEQSGVKENKESIQQCRMETFKGMSVAKSNKVTFHDYPECEGVYCYLENLERHLEFHQRKYNQCTASIRNVDHLIYVSSQQENSRGRERDNQEERLKDMLDCVHQPIKTEEKQSNHNKDKQPCGPLSFQQGHWRIYRGEKPYKCTDCGKSFSHSTTLNAHYRIHTGDMYKCTECGKSFTQSSAVRAHQRIHTGEKPYICTDCGKSFIRIANLLTHQRIHTGEKPFNCVECGKSFTQLS…							1/1:1:40	5.5e-06	ENTFEDIEKFFTKDEWVELQDWEKEVYLTIKEHYDTIISF	1/1:3:40	1.5e-14	TFEDIEKFFTKDEWVELQDWEKEVYLTIKEHYDTIISF	1/1:3:40	1e-11	TFEDIEKFFTKDEWVELQDWEKEVYLTIKEHYDTIISF	1/1:3:40	8e-23	TFEDIEKFFTKDEWVELQDWEKEVYLTIKEHYDTIISF	1/1:3:40	5.3e-27	TFEDIEKFFTKDEWVELQDWEKEVYLTIKEHYDTIISF
426	lcha ZNF		JH126786.1(1063039-1064850;+)	lcha	Latimeria chalumnae	Coelacanth	Sarcopterygii (lobe-finned fishes)		SYKLNFCRKLETSSNPRMMEEALLEVEMDVPFVKPESVLERGGFSNHTENKEQVTNDPLVVKTELVHEIREMTEKVPVNITKRAWGAATVCNQEEIRKMHINRSEDIEMYFTKDEWAELQDWEKDVYRDLKGHYDTIISFGHEFPKPEFMSKVQKTHQVSVWEPIHYKGASLVIPVTNMAKNSKQSPLRAFSNSQSFHANAIIKHLRNIQETETSQQCVVQTSKELSTVQNNKEAFCNCSECKENHSHLVNLKRHLEINQRLYKGFLEKLQKHLEHQQSKYNYCLDKVQKHLEIHQRKNSPCSSSVSNSSCLNQVIPGQSESQGEERPNVQECLKDLVDYVQQPMQAEGRKYNCTKKLQLCGSLPFQYEQQQVYTGEKPHQCTKCGKSFRYLLSLKQHN…							1/1:1:40	2e-06	INRSEDIEMYFTKDEWAELQDWEKDVYRDLKGHYDTIISF	1/1:3:40	2.8e-15	RSEDIEMYFTKDEWAELQDWEKDVYRDLKGHYDTIISF	1/1:3:40	7.8e-10	RSEDIEMYFTKDEWAELQDWEKDVYRDLKGHYDTIISF	1/1:3:40	2.9e-23	RSEDIEMYFTKDEWAELQDWEKDVYRDLKGHYDTIISF	1/1:3:40	1.4e-26	RSEDIEMYFTKDEWAELQDWEKDVYRDLKGHYDTIISF
427	lcha ZNF		JH126786.1(1101136-1102957;+)	lcha	Latimeria chalumnae	Coelacanth	Sarcopterygii (lobe-finned fishes)		QDLPVLLLIPTVLGSVVVREVQLSNPRPERSMSGSNFNHLDGTASGLAFYKAFRKKSIQVKYFISCIVLCCIGSHRTMDTLRQQEETDVLHLKTQPVWELSSASNQETREIPVNSDQLEKENTFKDIEKYFTKDEWAELQDWEKEVYLTIKEHYDTIISFGYEFPKPDFMTEVKETQQLPVCDSTFCTEGQQHSGVMPLQKREKQVQMRDKPYQCTEFGKSFTHSSSLHSHQVVHSRKLYECTECEESFRQESDLDSHQRSHRKKKMYNYTDCGKNFTGSTCLYLYQGIHIGEKCYQCKECEKIFRDSNTLSLHQRIHTREKPYKCTECGKSFDQSPQLKIHQCIHTGEKPYKCTECEKSFNWSSSLNMHKRIHTGEKPYKCTECGKSFNRSSSLKRHR…							1/1:1:40	1.2e-06	ENTFKDIEKYFTKDEWAELQDWEKEVYLTIKEHYDTIISF	1/1:3:40	1.8e-16	TFKDIEKYFTKDEWAELQDWEKEVYLTIKEHYDTIISF	1/1:3:40	3e-13	TFKDIEKYFTKDEWAELQDWEKEVYLTIKEHYDTIISF	1/1:3:40	2.6e-23	TFKDIEKYFTKDEWAELQDWEKEVYLTIKEHYDTIISF	1/1:3:40	2.8e-28	TFKDIEKYFTKDEWAELQDWEKEVYLTIKEHYDTIISF
428	lcha ZNF		JH126786.1(1132087-1133066;+)-1	lcha	Latimeria chalumnae	Coelacanth	Sarcopterygii (lobe-finned fishes)		CKKLLLCTVEISSGEMCLLNLFNRIFAGSRSLKSWQRGMEQYLLEAETDVPFVAMMEAVGEIDNFSNQQETKAMAASAPLKNEPVWETDTFSNQEIREILVNPDHQQETKVMAASTPLKVEPVWETDTFSNQETREILVNPDHQQETGAMAASAPLKVEPVWETDTFSNQENREILVNPDQLQIDNTFEDIEKYFNKDEWAELQDWEKEVYRSLKEHYDAIISFGYIEFPKPDFMTKVKENYQLPVYDSPHSQEDESPIKPVTNTTNNSRQSPLQVSFNNQPFHAKAVLKPLGNIQETENSQQCVVQTFKELKTVQSNKKTFYNCAECKENYNCLVKLKRHLEINQRLYNDFFEKLQRHLEHQQSKYNYCLDKLQKHLEVHQSKNNPGRSSEKNSSCLS…							1/1:1:40	1.9e-06	DNTFEDIEKYFNKDEWAELQDWEKEVYRSLKEHYDAIISF	1/1:3:40	4e-16	TFEDIEKYFNKDEWAELQDWEKEVYRSLKEHYDAIISF	1/1:3:40	2.1e-12	TFEDIEKYFNKDEWAELQDWEKEVYRSLKEHYDAIISF	1/1:3:40	2.3e-23	TFEDIEKYFNKDEWAELQDWEKEVYRSLKEHYDAIISF	1/1:3:40	2.6e-28	TFEDIEKYFNKDEWAELQDWEKEVYRSLKEHYDAIISF
429	lcha ZNF		JH126786.1(1132087-1133066;+)-2	lcha	Latimeria chalumnae	Coelacanth	Sarcopterygii (lobe-finned fishes)		NTFKDIEMYLTKDEWAELQDWEKEVYLTIKEHYDTIISFGYEFPKPDFMTEVKET							1/1:2:39	1.9e-06	TFKDIEMYLTKDEWAELQDWEKEVYLTIKEHYDTIISF	1/1:2:39	6.8e-14	TFKDIEMYLTKDEWAELQDWEKEVYLTIKEHYDTIISF	1/1:2:39	2e-11	TFKDIEMYLTKDEWAELQDWEKEVYLTIKEHYDTIISF	1/1:2:39	4.3e-23	TFKDIEMYLTKDEWAELQDWEKEVYLTIKEHYDTIISF	1/1:2:39	8.6e-27	TFKDIEMYLTKDEWAELQDWEKEVYLTIKEHYDTIISF
430	lcha ZNF		JH126786.1(858549-859704;-)	lcha	Latimeria chalumnae	Coelacanth	Sarcopterygii (lobe-finned fishes)		LNSFRKQKCKELPQGGRASPSGRRNRCSLCCWNRSVWGKQSNFSNQQETKAMAVSAPLKTEAVWKTDTISNQETNDILVNPDQLQMDNTFEDIEKYFTKDEWAELQDWEKEVYRSLKEHYDAIISFGYNFPKPEFMTEVKENYQLPVYDSPHSQEDESPIKPVNTTNNSRQSPLQVSFNNQPFHAKAVLKPLGNVQETENSQQCVVQTSKELKTVQSNKETFYNCAECKENYNCLVKLKKHLKINQRLYNDLLEKLQRHLEHQQSKYNYCLDKLQKHLEVHQSKNNPGRSSEKNSSCLSPDSFSKEEHREERMWTQRPNLKGMKDHLQQRHQTEEKKYHCTEGQQVWVLLPFQQEQQQVPTEKKLYKCTECVKCFPQLSALNAHQKTHIREENHKCMEC…							1/1:1:40	3.4e-07	DNTFEDIEKYFTKDEWAELQDWEKEVYRSLKEHYDAIISF	1/1:3:40	1.1e-17	TFEDIEKYFTKDEWAELQDWEKEVYRSLKEHYDAIISF	1/1:3:40	1.8e-12	TFEDIEKYFTKDEWAELQDWEKEVYRSLKEHYDAIISF	1/1:3:40	6.6e-24	TFEDIEKYFTKDEWAELQDWEKEVYRSLKEHYDAIISF	1/1:3:40	3.3e-29	TFEDIEKYFTKDEWAELQDWEKEVYRSLKEHYDAIISF
431	lcha ZNF		JH126786.1(1146566-1147553;+)	lcha	Latimeria chalumnae	Coelacanth	Sarcopterygii (lobe-finned fishes)		FIEIFNQIFAGSRSLKSWQRGKEQHLLKVETDVPFVAMMEAVGEIDNFSNQQETKAMAASAPLKNEPVWETGTFSNQETREILVNPDQLQIDNTFEDIEKYFNKDEWAELQDWEKEVYRSLKEHYDAIISFGYIEFPKPDFMTEVKENYQLPVCDSTHSQEEESPIKPVTNTTNNSRQSPLQVSFNNQPFHAKAVLKPLGNIQETENSQQCVVQTSKELKTVQNNKETFYNCAECKENYNCLVKLKRHLEINQRLYNDFFEKLQQHLEHQQSKYNYCSDKLQKHLEVHQSKNNPGRSSEKNSSCLSPDSLSKEEHREERMWTQHPNLKGMKDHLQQRHQTEEKKYHCTEGQQVSVPSPFQQEQQVTTEKKLYKCTECVKCFPQLSALNVHQKTHTREKK…							1/1:1:40	1.9e-06	DNTFEDIEKYFNKDEWAELQDWEKEVYRSLKEHYDAIISF	1/1:3:40	4e-16	TFEDIEKYFNKDEWAELQDWEKEVYRSLKEHYDAIISF	1/1:3:40	2.1e-12	TFEDIEKYFNKDEWAELQDWEKEVYRSLKEHYDAIISF	1/1:3:40	2.3e-23	TFEDIEKYFNKDEWAELQDWEKEVYRSLKEHYDAIISF	1/1:3:40	2.6e-28	TFEDIEKYFNKDEWAELQDWEKEVYRSLKEHYDAIISF
432	lcha ZNF		JH126786.1(1160597-1161857;+)	lcha	Latimeria chalumnae	Coelacanth	Sarcopterygii (lobe-finned fishes)		CTNLTTYKLGYFRKQQISFHRTMEKRMQEEERDVLVVKTEPVWETASVHNQEETREIPVNPDKMENGFKDIEIYFTKDEWVELQDWEKEVYRDVKEHYDTIISFGYQFPKPDFMTEVKATHWPPMCESIYSKEDNSLISETNIVIISNESKYSCPIYTFTINDQTQILQDTKNSQHCVAENFKEISTVETKEEMSCHCLEREESYDCLEELEGHLELHHGRYNQCAASARTRSHACHALLQQKVPRGGERQTQCEYMEVMIECENQRLQAVEKQYECTKGQWLNDQQSFRQQEEVQAGEIPYHCMEQGKNLEGHSHSKHQHQSDMGEKPRKCAKFREGFRKQSDLQGQQTTDTREKLCICTECGESFSQFSTLKRHQKIHMVHTGERPYQCTQCGKTFS…							1/1:1:40	1.6e-09	ENGFKDIEIYFTKDEWVELQDWEKEVYRDVKEHYDTIISF	1/1:3:40	4.2e-18	GFKDIEIYFTKDEWVELQDWEKEVYRDVKEHYDTIISF	1/1:3:40	4e-10	GFKDIEIYFTKDEWVELQDWEKEVYRDVKEHYDTIISF	1/1:3:40	1.1e-23	GFKDIEIYFTKDEWVELQDWEKEVYRDVKEHYDTIISF	1/1:3:40	2.3e-28	GFKDIEIYFTKDEWVELQDWEKEVYRDVKEHYDTIISF
433	lcha ZNF		JH126786.1(1177901-1180180;-)	lcha	Latimeria chalumnae	Coelacanth	Sarcopterygii (lobe-finned fishes)		SGLTYQFNNCKLGYFRKPQISFHRTMEKRMQEEETDILVMKTEPVWERVRVYNQEETREIPVNPDEVENGFKDIEMYFTKDEWVELQDWEKKVYRDVKEHYDTIISFGYEIPKPDFMTIVKETHQLPVCEFTHNKTESPLIDFCSCHALYESSRTKHSPSVGKESCLIQVLPQQEGPRGEERENQHECLKDRIARECDPFQAVEKQYDCHKDQRLCDSLSFKQRHQQVYTGKKTYKYTESGKSYSNSSDLKKHQQSYTVEKPYECKECGKPFLTPSALNAHQRIHVTETPYRCTESGKSLRKSSGLKQPQEIVTGEKACKCTECGKSFKDVSALNKHQRIHTGERPYKCTECGKHFRLLSHFKAHKRIHVGEKPYQCTECGKSFTQSSSLKSHLRIHTA…							1/1:1:40	4.9e-09	ENGFKDIEMYFTKDEWVELQDWEKKVYRDVKEHYDTIISF	1/1:3:40	1.7e-18	GFKDIEMYFTKDEWVELQDWEKKVYRDVKEHYDTIISF	1/1:3:40	2.6e-10	GFKDIEMYFTKDEWVELQDWEKKVYRDVKEHYDTIISF	1/1:3:40	1.2e-23	GFKDIEMYFTKDEWVELQDWEKKVYRDVKEHYDTIISF	1/1:3:40	6.5e-28	GFKDIEMYFTKDEWVELQDWEKKVYRDVKEHYDTIISF
434	lcha ZNF		JH126786.1(1198433-1200134;-)	lcha	Latimeria chalumnae	Coelacanth	Sarcopterygii (lobe-finned fishes)		IVFIINYINLSCIGSHRTRDTLRQQEETNVLLLKTEPVWELSSTSNRETRETPVNPDQLEKENTLKDIEKYFTKDEWAELQDWENEVYLTIKECYDTIITFGYEFPKPDFMTEVREIHQLPMCESTISKDYSVQLYEISTVNSKATPLTYPF							1/1:1:40	2.6e-05	ENTLKDIEKYFTKDEWAELQDWENEVYLTIKECYDTIITF	1/1:3:40	9.5e-13	TLKDIEKYFTKDEWAELQDWENEVYLTIKECYDTIITF	1/1:3:40	9.4e-11	TLKDIEKYFTKDEWAELQDWENEVYLTIKECYDTIITF	1/1:3:40	1.2e-20	TLKDIEKYFTKDEWAELQDWENEVYLTIKECYDTIITF	1/1:3:40	8e-24	TLKDIEKYFTKDEWAELQDWENEVYLTIKECYDTIITF
435	lcha ZNF		JH126786.1(1248080-1250321;-)	lcha	Latimeria chalumnae	Coelacanth	Sarcopterygii (lobe-finned fishes)		ISFHRTMEKRMQEEERDVLVVKTEPVWETASVHNQEETREIPVNPDKMENGFKDIEMYFTKDEWVELQDWEKEVYRTIKEHYDIIISFGYKCPKPDFMTEAKIVHQLSVCKSTHTKGNDSLLSVVDIQNELPFIDSSNNEILHVSTFMEQSGRTGNSQKCLVEAFKETGAAQSNKDTFYDCSECEEIYDCLEELQGHLELCHMKHTQCAASKRNRSCLIQVLPQQEGPRGEERENQHECLKDRIECECDPFQAVEKQYDCRKDQQLCDSLSFKQGHQQFYTGKKTYKCTQSGKSYSNSSDLKKHQQHYTGEKPYEGKECGKPFLTSLALNAHQRIHTAKTLYKCTESGKSLRKSSYLKRHQHIHTGKKPYKCTECGKSFRKSTSLKHHQKLHVGEKLYK…							1/1:1:40	6.2e-07	ENGFKDIEMYFTKDEWVELQDWEKEVYRTIKEHYDIIISF	1/1:3:40	7.8e-16	GFKDIEMYFTKDEWVELQDWEKEVYRTIKEHYDIIISF	1/1:3:40	2.2e-10	GFKDIEMYFTKDEWVELQDWEKEVYRTIKEHYDIIISF	1/1:3:40	6.6e-24	GFKDIEMYFTKDEWVELQDWEKEVYRTIKEHYDIIISF	1/1:3:40	9.6e-28	GFKDIEMYFTKDEWVELQDWEKEVYRTIKEHYDIIISF
436	lcha ZNF		JH126786.1(1314773-1315340;-)	lcha	Latimeria chalumnae	Coelacanth	Sarcopterygii (lobe-finned fishes)		RISLHRRMEIPQQKEETDMILVQTKPVWKSTSINNQEESKKIPVNPDQLQTENTFEEIEKYFTKDEWVELQDWEKEVYRSLKEHYDTIVSFGYKFPKPDFMIEVKVKNLNPVCESTQRKTADSPTLPDINMVSEGTESPFIVSYNTDSINTGNKIKILKTKQKKSNHQRCAVQEFEEKGSVQKKEDSFYYCSVCQERFISLEKIQNHWQFQQTSSSESTGCRKYSSDLVHSSHEKEQFGEGKDIPXXXXXXXXXXXXXXXXXXXXXXXXXXXXXXXXXXXXXXXXXXXXXXXXXXXXXXXXXXXXXXXXXXXXXXXXXXXXXXXXXXXXXXXXXXXXXXXXXXXXXXXXXXXXXXXXXXXXXXXXXXXXXXXXXXXXXXXXXXXXXXXXXXXXXXXXXX…							1/1:1:40	1.3e-06	ENTFEEIEKYFTKDEWVELQDWEKEVYRSLKEHYDTIVSF	1/1:3:40	1.6e-15	TFEEIEKYFTKDEWVELQDWEKEVYRSLKEHYDTIVSF	1/1:3:40	3.3e-11	TFEEIEKYFTKDEWVELQDWEKEVYRSLKEHYDTIVSF	1/1:3:40	3.7e-23	TFEEIEKYFTKDEWVELQDWEKEVYRSLKEHYDTIVSF	1/1:3:40	2.4e-27	TFEEIEKYFTKDEWVELQDWEKEVYRSLKEHYDTIVSF
437	lcha ZNF		JH126786.1(1325205-1326189;+)	lcha	Latimeria chalumnae	Coelacanth	Sarcopterygii (lobe-finned fishes)		EKYFINCIVLYCIGRHRTMDALHQQEETEVLLLKTEPVWESSSISNQEIRETPVYPHQLEKGNRFKDIEIYFTKDEWAELQDWEKEVYLTIKEHYDTIISFGYEFPKPDFMTEVKETQQLPVCDSTFCTEGQQHSGVMPLQQGEQQVQMRDKPYQCTECGKSFTRSSSLHSHQVVHSRKLYECTECEEKFREESDLDSHQRSRRKRRKYNCVECGKNFTRSTSLNAHQRIHTGEKPYKCKDCDKRFRAKSNLNSHQRIHTGEKPYKCTVCGKSFRISTNFTSHQRIHTGEKPYKCTVCGKSFRISTDFISHQRIHTGEKPYKCEVCGKSFRVSSYLNNHQRIHTGEKPYKCSECGKSFSQSRHFILHQRVHTGEKPYKCPECGKCFRNSSYLYVHQNIH…							1/1:1:40	5.3e-07	GNRFKDIEIYFTKDEWAELQDWEKEVYLTIKEHYDTIISF	1/1:3:40	1e-16	RFKDIEIYFTKDEWAELQDWEKEVYLTIKEHYDTIISF	1/1:3:40	4.3e-12	RFKDIEIYFTKDEWAELQDWEKEVYLTIKEHYDTIISF	1/1:3:40	3.2e-23	RFKDIEIYFTKDEWAELQDWEKEVYLTIKEHYDTIISF	1/1:3:40	1.5e-27	RFKDIEIYFTKDEWAELQDWEKEVYLTIKEHYDTIISF
438	lcha ZNF		JH126786.1(1411458-1412193;-)	lcha	Latimeria chalumnae	Coelacanth	Sarcopterygii (lobe-finned fishes)		ADSLLPFWLSQHVIILEIHLVVYFASWYSELIIEFINSVIAGSGCQRMMERELERDKTDGFIIVKLEPDWESASVGNQEEAGEIPVNPDQLEVKKRFKDIEQYFTKDEWGELQDWEKEVYRDVKEHYDTIISFGYKFPKPDFMTEVKKTCQLPVFESTYCKEDDFTVFGNTHEYLKSLMLYVKRPAPTRKKQNNCPNGQNLAEVPCPHEKQHICAECGKIFRHSSNLSAHRRVHTGEKPYKCSECGKSFTWLSGLQNHQLMHTGKKPHECTECGKSFRWSSVLNAHQRTHTGEKPYKCPECGKSFSKSGILKVHQQVHIQCKPYQCPECGKSFKRTSELNTHQIIHTGEKPYKCIECGKSFSRSSSLKSHYRHHTGEKPYQCTECGKSFIQASDLTKHN…							1/1:1:40	1.4e-08	KKRFKDIEQYFTKDEWGELQDWEKEVYRDVKEHYDTIISF	1/1:3:40	2.2e-18	RFKDIEQYFTKDEWGELQDWEKEVYRDVKEHYDTIISF	1/1:3:40	1.6e-11	RFKDIEQYFTKDEWGELQDWEKEVYRDVKEHYDTIISF	1/1:3:40	1e-23	RFKDIEQYFTKDEWGELQDWEKEVYRDVKEHYDTIISF	1/1:3:40	9.8e-29	RFKDIEQYFTKDEWGELQDWEKEVYRDVKEHYDTIISF
439	lcha ZNF		JH126786.1(1335800-1336868;+)	lcha	Latimeria chalumnae	Coelacanth	Sarcopterygii (lobe-finned fishes)		IGSHRTMDTLRQQEETNVLLKTQPVWELSSTSSQETRETPVYPHQLEKGNTFKDIEKYFTKDEWAELQDWEKEVYLTIKEHYDAIISFGYEFPKPDFMTEVKETQQLPVCDSTFCTEGQQHSGVMPLQQGEQQVQMRDKPYQCTECGKSFTRSSSLHSHQTIHSRKLYECTECEESFGQESDLDSHQRSHRKKKTYQCAECGKNFTRSTGLNSHQRIHTGEKPYECKECGKSFRTVTDLSSHQQIHTGEKRYQCKECGKKFRDSNTLSVHQRIHTGEKPYKCKVCGKRFRANSNFYSHQRIHTGEKPYKCTVCGKSFRISTNLNSHQRIHTGEKPFKCTECGKSFNQSMNLTIHRRIHTGEKPYKCSECGKRFRNSSHLYVHQNIHTGEKPYKCTECGK…							1/1:1:40	1.8e-06	GNTFKDIEKYFTKDEWAELQDWEKEVYLTIKEHYDAIISF	1/1:3:40	6.3e-17	TFKDIEKYFTKDEWAELQDWEKEVYLTIKEHYDAIISF	1/1:3:40	4.3e-13	TFKDIEKYFTKDEWAELQDWEKEVYLTIKEHYDAIISF	1/1:3:40	4.9e-23	TFKDIEKYFTKDEWAELQDWEKEVYLTIKEHYDAIISF	1/1:3:40	3.6e-28	TFKDIEKYFTKDEWAELQDWEKEVYLTIKEHYDAIISF
440	lcha ZNF		JH126786.1(1355525-1356675;+)	lcha	Latimeria chalumnae	Coelacanth	Sarcopterygii (lobe-finned fishes)		VPPVLLIPTVVGSVVAGEVQLSIPHPGPERSISESNFDHLGGTANALAFYKAFRKEGSQEKYFIHCVVLHCTGRHRTMDALRHQEETDVLPLKTQPVWELPSTSNQETRETPVNPHQLEKENTFKDIEKYFTKDEWAELQDWEKEVYLTIKEHYDTIISFGYEFPKPDFMTEIKETHQLPVCDSTFCTEGQQHSGVMPLQQGEKQVQMRDKPYQCTECGKSFTRSSSLHSHQVVHSRKLYECTECEESFKQESDLDSHQRSHTKKKTHNCVECGKNFKSSSNLYSHQRIHTGERPYECKECGKRFRTITHLSSHQQIHTGEKRYQCKECGKRFRDSSTLSIHQRIHTGEKPYKCTDCGKSFRVNSNFYIHQRIHTGEKPYKCKVCGKSFRISSYLNSHQ…							1/1:1:40	1.2e-06	ENTFKDIEKYFTKDEWAELQDWEKEVYLTIKEHYDTIISF	1/1:3:40	1.8e-16	TFKDIEKYFTKDEWAELQDWEKEVYLTIKEHYDTIISF	1/1:3:40	3e-13	TFKDIEKYFTKDEWAELQDWEKEVYLTIKEHYDTIISF	1/1:3:40	2.6e-23	TFKDIEKYFTKDEWAELQDWEKEVYLTIKEHYDTIISF	1/1:3:40	2.8e-28	TFKDIEKYFTKDEWAELQDWEKEVYLTIKEHYDTIISF
441	lcha ZNF		JH126786.1(1374104-1375340;+)	lcha	Latimeria chalumnae	Coelacanth	Sarcopterygii (lobe-finned fishes)		IVLYYIGSHRTMEMLHQQEETDVLLKTEPVWESSSNQETRETPVNPCQLEKGNTFKDIEMYFTKDEWAELQDWEKEVYLTIKEHYDTIISFGYEFPKPDFMTEVKETQQLPVCDSTFCTEGQQHSGVMPLQQGEQQVQMRDKPYQCTECGKSFTRSSSLHSHQVVHSRKLYECTVCGESFRQESDLDSHQRSHTKKKTHNCAECGKNFKSSSNLYSHQRIHTGERPYECTECQKCFRTVSHLSSHQKTHIGEKPYKCKECGKSFRDSSALYSHQRIHTGEKPYKCTDCGKCFRNSSNFYIHQRIHTGKKPCKCKECEKSFRDTSALYNHQRIHTGEKPFKCKDCGKSFRLSRNLTMHQRTHTGEKPYKCSECGKGFTNSSNLYVHQSIHAGEKPYKCTE…							1/1:1:40	2.1e-07	GNTFKDIEMYFTKDEWAELQDWEKEVYLTIKEHYDTIISF	1/1:3:40	8.2e-17	TFKDIEMYFTKDEWAELQDWEKEVYLTIKEHYDTIISF	1/1:3:40	2.3e-12	TFKDIEMYFTKDEWAELQDWEKEVYLTIKEHYDTIISF	1/1:3:40	5.2e-24	TFKDIEMYFTKDEWAELQDWEKEVYLTIKEHYDTIISF	1/1:3:40	1.4e-28	TFKDIEMYFTKDEWAELQDWEKEVYLTIKEHYDTIISF
442	lcha ZNF		JH126786.1(1458412-1459997;-)	lcha	Latimeria chalumnae	Coelacanth	Sarcopterygii (lobe-finned fishes)		AIYSHSSLFSCSRRRTAITPPPTHTHTHNFRPERSTSGLDLSHPGGSAKCFCFYKAFRKEEIQEKYFINCVVLYCVGSHRTMDALNQQEETNVLLKTEPVWDSSGNQETRETPVNPDQLEKENAFKDIEMYFTKDEWTELQDWEKEVYLTIKEHYDTIISFGYEFPKPDFMTEVKETQQLPVCDSTFCTEGQQHSGVMPLQQGEQQVQMRDKPYQCTECGKSFTRSSSLHSHQTVHSRKLYECTECEESFRQESDLDSHQQCHRKKKPYNCAECGKNFARSSGLYSHQRIHTGEKPYECTVCGKSFRSVSNLSSHQQIHTGEKRYKCKECGKSFRDSSTLYSHQRIHTGEKPYKCTDCGKNFRNSSNFYIHQRIHTGEKPYKCTECGKSFRISSNLNSH…							1/1:1:40	7e-07	ENAFKDIEMYFTKDEWTELQDWEKEVYLTIKEHYDTIISF	1/1:3:40	1.4e-16	AFKDIEMYFTKDEWTELQDWEKEVYLTIKEHYDTIISF	1/1:3:40	2.1e-12	AFKDIEMYFTKDEWTELQDWEKEVYLTIKEHYDTIISF	1/1:3:40	1.4e-23	AFKDIEMYFTKDEWTELQDWEKEVYLTIKEHYDTIISF	1/1:3:40	6.9e-28	AFKDIEMYFTKDEWTELQDWEKEVYLTIKEHYDTIISF
443	lcha ZNF		JH126786.1(1484232-1485345;-)	lcha	Latimeria chalumnae	Coelacanth	Sarcopterygii (lobe-finned fishes)		EKYFTNCMVLYCTGRHRTMDELHQQEETNVLLLKTEPVWESSSTSNQETRATPVNPHQLEKENKFKDIEMYFTKDEWAELQDWEKEVYLTIKEHYDTIISFGYEFPKPDFMTEVREIHKLPVCENTLNKDYSPELYEMIEINTVHSNESPFTIHSRTQPIIAVTIKEQTNEIQNMENTQQCDMQVLEETSTVQCKETLYYCPECGESYNCVEELELHQKECDHCTNSLKDSNYFIHVLQHRKEKYSQEECLKDKMDNVHLPSITEVKQYICTEGQQHSGQMPFQQRQQQVQMGNKPYQCAEYGKGFTNSSKLKAHQRIHIGEKTYKCKECGKSFLQSSSLHNHQTVHTGEKPYKCAECGKSFRRASNLYSHQQIHTGEKLYKCTECGKTFRDSSALYNH…							1/1:1:40	6.8e-07	ENKFKDIEMYFTKDEWAELQDWEKEVYLTIKEHYDTIISF	1/1:3:40	2.4e-16	KFKDIEMYFTKDEWAELQDWEKEVYLTIKEHYDTIISF	1/1:3:40	3.4e-12	KFKDIEMYFTKDEWAELQDWEKEVYLTIKEHYDTIISF	1/1:3:40	1.3e-23	KFKDIEMYFTKDEWAELQDWEKEVYLTIKEHYDTIISF	1/1:3:40	1.1e-27	KFKDIEMYFTKDEWAELQDWEKEVYLTIKEHYDTIISF
444	lcha ZNF		JH126786.1(1502997-1504115;-)	lcha	Latimeria chalumnae	Coelacanth	Sarcopterygii (lobe-finned fishes)		IGSHRTMDTLRQQEETNVLLLKTQPVWESSSASNQEIRETPVNPHQLQKGNTFKDIEMYFTKDEWAELQDWEKEVYLTIKEHYDTIISFGYECPKPDFMTEVRETHQLLMCESILSQVKYSPILYEINTVSSKESSLMIHSGTQPIIGVTTNEIQNTENTQQCDMQVFQKISTVQSKEETLYYCPECEESYNCVEELEIHQKECNHCTGSVKDSSYFIHVLQHRKEKYPQEECLKDKMDNVHQPSITEVKQYICTEGQQHSGQMPFQQGQQQVQMGDKLYQCAECGKGFISLSKLKAHQRIHTGEKPYKCAECGKNFTQSSQLYTHQRIHTGEKPYKCAECGKNFTQSSQLYTHQRIHTGEKPYKCTECGKNFRNSLTLCNHQRIHTGEKPYKCTECEK…							1/1:1:40	2.1e-07	GNTFKDIEMYFTKDEWAELQDWEKEVYLTIKEHYDTIISF	1/1:3:40	8.2e-17	TFKDIEMYFTKDEWAELQDWEKEVYLTIKEHYDTIISF	1/1:3:40	2.3e-12	TFKDIEMYFTKDEWAELQDWEKEVYLTIKEHYDTIISF	1/1:3:40	5.2e-24	TFKDIEMYFTKDEWAELQDWEKEVYLTIKEHYDTIISF	1/1:3:40	1.4e-28	TFKDIEMYFTKDEWAELQDWEKEVYLTIKEHYDTIISF
445	lcha ZNF		JH126786.1(1522465-1524022;-)	lcha	Latimeria chalumnae	Coelacanth	Sarcopterygii (lobe-finned fishes)		IIAESNRKPTMDILPQEKETNVVHLKPEPVWETTSATTQEDIKDRPENADQLELENTFKNIEEYFTQDEWVELQDWEKDVYKTVKEHYDTIISFGYQCPKPEFMADVKETQQLGVFETTHSKEDDFSLLHKADIINNSNESPLIKSCDIQSIHVSTVMEKSRGKDNTENAQQCRAQTFKEMRPMQSNEENLFHWLEHEEGFHCQEKFSQHLETHQNEHNPFPGSNKNSSQLIHVLPHEEETCNQQECVKEKMNSLHQPIQSEVNQHDCTKNQKQVHPEEKPHQCTECGKSFSSSSKLKTHQRIHTGEKPYKCTECGKSFTQLSNLHIHQRIHTGEKPHKCTECEESFRNLLSLKIHQQIHSGEKLYKCMECGKCFTHVSPLYSHQRIHTGEKPYKCTEC…							1/1:1:40	9e-07	ENTFKNIEEYFTQDEWVELQDWEKDVYKTVKEHYDTIISF	1/1:3:40	9e-15	TFKNIEEYFTQDEWVELQDWEKDVYKTVKEHYDTIISF	1/1:3:40	4e-10	TFKNIEEYFTQDEWVELQDWEKDVYKTVKEHYDTIISF	1/1:3:40	1.4e-21	TFKNIEEYFTQDEWVELQDWEKDVYKTVKEHYDTIISF	1/1:3:40	1.1e-24	TFKNIEEYFTQDEWVELQDWEKDVYKTVKEHYDTIISF
446	lcha ZNF		JH126836.1(16655-17978;-)	lcha	Latimeria chalumnae	Coelacanth	Sarcopterygii (lobe-finned fishes)		LIVGNRRMEELLQEGEADGLLVTKTEPDWERASVGHEETRNMPVNPDQIKTEETFKDIEMYFTKDEWVGLQVWEKEVYRDIKEHYDTIISFGYKFPKPDFMCQVKETHPLTACESVCGEDTAVILTETNSLHHFNESLLATSSNIELTNGKTKAENSGGIDKIQSIQHVAEQVLQDRNITQSKESSLYDSSDCEERESENQSMQTGKKGYNCIEPQQHCLPQSFQHGQQQVLTAEKSYICTECGKSFRQLSHLYMHQRIHTGEKPYQCTECGECFRQLAHLNTHKRIHTGEKPYQCTECGKHFTVLSSFVKHKRVHTGEKPYKCKACGKSFSQVSHLNTHLRIHTGEKPYKCTMCGKTFCQASTLNTHKQIHTGEKPYKCTECGKCFVQVSHLNTHKQI…							1/1:1:40	4.4e-09	EETFKDIEMYFTKDEWVGLQVWEKEVYRDIKEHYDTIISF	1/1:3:40	1.3e-15	TFKDIEMYFTKDEWVGLQVWEKEVYRDIKEHYDTIISF	1/1:3:40	2.2e-10	TFKDIEMYFTKDEWVGLQVWEKEVYRDIKEHYDTIISF	1/1:3:40	6.5e-24	TFKDIEMYFTKDEWVGLQVWEKEVYRDIKEHYDTIISF	1/1:3:40	2.1e-28	TFKDIEMYFTKDEWVGLQVWEKEVYRDIKEHYDTIISF
447	lcha ZNF		JH126836.1(30221-31794;-)	lcha	Latimeria chalumnae	Coelacanth	Sarcopterygii (lobe-finned fishes)		ERKKRWVYILLLTVKHSGKKVVSAVRRETRIMPAVVSHFEMEQRVEDIEIYFTKDEWEELQDWEKEVYRDIKEHYDVIISFGYEFPKPDFMCKIYQENVCAFACGREGESPVMSGTNSIYHSNDSLLSPSTNTKPSNVNSNVEQAGGIQNNKSSRQVVEKAFMERNIAECKNECLTDCCECKEMDNCTETLIQHKENLQRDLKDSAVCKGNCSHLSNFLLHQELSGEDERDNIQKPLQTRTHCTHQTFRYVAKDFSSNKGIQNCDPVPFKQEQKQFHTGEKPYQCTECDKSFNKLVNLNSHQFIHTGEKPHICSECGKSFSQNRALTKHKQIHTGEKPYKCTECGKSFHQDSDLTKHRRVHTGEKPYKCTQCEKSFSQVSNLKRHQQVHMKKKQYICTE…							1/1:1:40	5e-08	EQRVEDIEIYFTKDEWEELQDWEKEVYRDIKEHYDVIISF	1/1:3:40	2.1e-16	RVEDIEIYFTKDEWEELQDWEKEVYRDIKEHYDVIISF	1/1:3:40	5e-10	RVEDIEIYFTKDEWEELQDWEKEVYRDIKEHYDVIISF	1/1:3:40	8.1e-24	RVEDIEIYFTKDEWEELQDWEKEVYRDIKEHYDVIISF	1/1:3:40	1.9e-27	RVEDIEIYFTKDEWEELQDWEKEVYRDIKEHYDVIISF
448	lcha ZNF		JH126836.1(62477-63884;-)	lcha	Latimeria chalumnae	Coelacanth	Sarcopterygii (lobe-finned fishes)		RKRRSICTLFLRMKHSGKEMVSVVRWETSNMAAVLNHFEMEQTIEDIEIYFTKDEWEELQVWEKEVYRDIKEHYDTIISFGYKFPKPDFMCKIYQGNVCVLACGKEDESNRASQSNDFPSSTPSNTKPSNVNSGVEQSGGIQKNKSSLQFVEKAFEERSSTEYKDESLTDCCKCKEMDNCTENLIQHRENQQRELKDSAGCKRNCSHSSSFLLQQELPGGEKRANRQKPERSRTHCTHQTVQCVEKDYKSNTALGMYDPVPFKHGQEQFHTGQKPYKCTECGKSFNKLVNLNSHQFLHTGEKPYKCLECGKSFSHSRALTKHKQIHTGEKPYKCTECGKSFRQDSDLTKHQRVHTGEKPYRCTQCEESFSQISNLNRHQQVHMEKEQYICTECGMSFTC…							1/1:1:40	3.5e-09	EQTIEDIEIYFTKDEWEELQVWEKEVYRDIKEHYDTIISF	1/1:3:40	4e-15	TIEDIEIYFTKDEWEELQVWEKEVYRDIKEHYDTIISF	1/1:3:40	2.2e-10	TIEDIEIYFTKDEWEELQVWEKEVYRDIKEHYDTIISF	1/1:3:40	1.8e-23	TIEDIEIYFTKDEWEELQVWEKEVYRDIKEHYDTIISF	1/1:3:40	2.9e-27	TIEDIEIYFTKDEWEELQVWEKEVYRDIKEHYDTIISF
449	lcha ZNF		JH126836.1(77654-79313;-)	lcha	Latimeria chalumnae	Coelacanth	Sarcopterygii (lobe-finned fishes)		EMLSAVQWETKNMAEFLNHFEMEQAFEDIEIYFTKDEWENLQDWEKEVYRDIKEHYDIIISFGYEIPKPDFMCKIYQGNVCILACGKEDDSPLISGTNSANQSNNFPSSAFSNTQPNNVILNVKHSGGILKNKSPLQFVEKAFEERSIAEYKDENLTDCWEYKEMDNCTENLIQHRGNQQGELKDCSGCKRNCSHSSNFLLHQELPGGERRENTPKQIQNRTHFTHQTFHHVEQYYRSNKSHQNFDPVSFKHGQNQIHTGEKPYKCTVCGKRFRQASDLTKHQRVHTGEKLYKCIECGKSFGQASDLTKHQRVHTGEKPYKCTQCEKSFSQLSNLYRHQQVHTEKEQYIGIQRVKIFSQLSDLNGHDQIHTGKKQYQCKECGMSFTRFGTLKTHQRFHT…							1/1:1:40	2.8e-10	EQAFEDIEIYFTKDEWENLQDWEKEVYRDIKEHYDIIISF	1/1:3:40	2.6e-16	AFEDIEIYFTKDEWENLQDWEKEVYRDIKEHYDIIISF	1/1:3:40	1.8e-11	AFEDIEIYFTKDEWENLQDWEKEVYRDIKEHYDIIISF	1/1:3:40	3.2e-24	AFEDIEIYFTKDEWENLQDWEKEVYRDIKEHYDIIISF	1/1:3:40	1.3e-28	AFEDIEIYFTKDEWENLQDWEKEVYRDIKEHYDIIISF
450	lcha ZNF		JH126836.1(89161-89980;-)	lcha	Latimeria chalumnae	Coelacanth	Sarcopterygii (lobe-finned fishes)		TVTERSSSNRPMEKVLQEEEVNLHLFAQNEAFWERGGAAVNLQEETSNMVALPNHCEVEKTFEDIEIYFSKDEWAELQVWEKEVYRDIKEHYDIIISFGYEFPKPDFMCETQVPVCVSDYTLLYLSDLTKPKRFHTGQKLYKCTECGKSFNNSSRFNIHQRFHTGEKPYTCTECGKSFSISSHLNIHQRIHTGEKPYTCTECGKSFIQASDLTKHQRVHTGEKPYKCTECGKSFSLLALLNRHQRVHTGEKPYICTECGKQFTDSSHLMNHNRIHTGEKPYKCAECGKSFSQISTLKRHKRVHTGEKPYACTECGKSFSLLAHLKTHQQLHTGEKPHQCPECRKSFSILAQLKMHQRIHTGEKPHQCPECGKRFSRLSTLTIHQRSHTGEKPYKCTECG…							1/1:1:40	5.1e-10	EKTFEDIEIYFSKDEWAELQVWEKEVYRDIKEHYDIIISF	1/1:3:40	1e-16	TFEDIEIYFSKDEWAELQVWEKEVYRDIKEHYDIIISF	1/1:3:40	2.3e-11	TFEDIEIYFSKDEWAELQVWEKEVYRDIKEHYDIIISF	1/1:3:40	9e-24	TFEDIEIYFSKDEWAELQVWEKEVYRDIKEHYDIIISF	1/1:3:40	1e-28	TFEDIEIYFSKDEWAELQVWEKEVYRDIKEHYDIIISF
451	lcha ZNF		JH126892.1(736398-737217;+)	lcha	Latimeria chalumnae	Coelacanth	Sarcopterygii (lobe-finned fishes)		GRKRKLVLPKTDPALERSSSPNTMEALQPEEETGTLLVPKMKPVWERLCFSSHEETRNTTMKADRCSMDKPFEDIEMYFTKDEWEELQDWEKEVYWDIKEHYDTIISFGYKIPKPDFMSRLEETHLFRLCQSVQSGMGNSPVLVENAMDSDANELSLSFSNPQQVLGQPALQSAQQACSPVQPNTVCFRIASFLSVSQEKAQLYICTECGQSFQQSAVLQLHQDAHSGETPRRYAEQEESIRLSGSLVSPQQAPAGEKPYKCAECGESFSFLVSLNAHQRIHTGEKAYECAACGEGFHEYEGLIAHKNVHAAENPYACTECGKSFSSASALSKHCRAHAGGKPYKCAECGKGFSASSALASHQRSHTGEKPYPCVECGKSFSLLSNRNRHQRIHIGEKP…							1/1:1:40	4.7e-08	DKPFEDIEMYFTKDEWEELQDWEKEVYWDIKEHYDTIISF	1/1:3:40	2.2e-14	PFEDIEMYFTKDEWEELQDWEKEVYWDIKEHYDTIISF	1/1:3:40	1.7e-11	PFEDIEMYFTKDEWEELQDWEKEVYWDIKEHYDTIISF	1/1:3:40	6.2e-24	PFEDIEMYFTKDEWEELQDWEKEVYWDIKEHYDTIISF	1/1:3:40	2.9e-28	PFEDIEMYFTKDEWEELQDWEKEVYWDIKEHYDTIISF
452	lcha ZNF		JH126892.1(993354-994927;-)	lcha	Latimeria chalumnae	Coelacanth	Sarcopterygii (lobe-finned fishes)		GWMRTSDHKEEIKNMSNDADPSKMEKSFQDIEAYFTKDEWQELQDWEKEVYRDIKEHYDTIISFGYDFPKPDFMSQIKETHPLTYREDTDIMCTKTNSVSHFHGSLLGIYSTIEPINIGTRVKKSGRIQKNQTFQPVAQQLLTNRNIAQSKKLGLHSSEYEKDCESPSTETRKKGCTPTKPHQLCSSQVFQRGQHQVLTGKKTYKYTEYEKSFTCESQLYIHKQTHTGEKPYECTECGKGFTCISHFDTHRRIHTEEKPYKCIECGKSFSRVSHLNIQKRIHTGETPYTCTECKKSFSWVSSLTIHHQIYTGEKPYKCTECGKSFALVSYLNIHKQTHTSEKPYKCIECGNSFSQVSQLNKHHRIHTGEKPSTCTECGKSFALVSILSKHKLIHTGVKP…							1/1:1:40	9.3e-09	EKSFQDIEAYFTKDEWQELQDWEKEVYRDIKEHYDTIISF	1/1:3:40	1.1e-16	SFQDIEAYFTKDEWQELQDWEKEVYRDIKEHYDTIISF	1/1:3:40	1.9e-11	SFQDIEAYFTKDEWQELQDWEKEVYRDIKEHYDTIISF	1/1:3:40	2.6e-24	SFQDIEAYFTKDEWQELQDWEKEVYRDIKEHYDTIISF	1/1:3:40	3.8e-28	SFQDIEAYFTKDEWQELQDWEKEVYRDIKEHYDTIISF
453	lcha ZNF		JH126892.1(1007351-1009472;-)	lcha	Latimeria chalumnae	Coelacanth	Sarcopterygii (lobe-finned fishes)		VFLRVNQTGRKTVIVRKKNRNMFISTDPSKMEKSLKDIEAFFTKDEWQELQDWEKEVYRDIKEHYDTIISFGYDFPKPDFMSRIKEKHREETDIVHTETKSVSHLSASLLEIYSNIEPTNIKTEVKKSGGQKDQNIPPVAQQVLTDRNVTQSVKLSVHSSSEYDKRFCENPSIQTGKKGCTHTKPHRICCPQSFHRGQQKGVAGRKAYQYTECGESFTCGSHLDLTHTGEKLYKCTECGKTFSLVANLTDHLQTHKEEKSHKCTECGKSFKRSSNLIRHQQTHTGEKLYKCTECGKTFNLVANLTDHLQTHKEEKSHKCTECGKSFKRSSNLIRHQQTHTGEKLYKCTECGKSFSLSSSLSQHKHIHTRQKACKCTECGKSFPCLSRLNIHKRIHTGEK…							1/1:1:40	6.5e-07	EKSLKDIEAFFTKDEWQELQDWEKEVYRDIKEHYDTIISF	1/1:3:40	7.9e-16	SLKDIEAFFTKDEWQELQDWEKEVYRDIKEHYDTIISF	1/1:3:40	1.7e-09	SLKDIEAFFTKDEWQELQDWEKEVYRDIKEHYDTIISF	1/1:3:40	2e-23	SLKDIEAFFTKDEWQELQDWEKEVYRDIKEHYDTIISF	1/1:3:40	1.4e-26	SLKDIEAFFTKDEWQELQDWEKEVYRDIKEHYDTIISF
454	lcha ZNF		JH126892.1(1019944-1021438;-)	lcha	Latimeria chalumnae	Coelacanth	Sarcopterygii (lobe-finned fishes)		INTGSSSRHRRMEKLHQEGDVKVLRVAKSESDREENRDCKEETRNTFINADQSKMERTFQDIEAFFTKDEWQELQDWEKEVYRDIKEHYDTIISFGYDFPKPDFMSQIKEKHREETDIVHTETKSVSHLSASLLEIYSNIEPTNIKTEVKKSGGQKDQNIPPVAQQVLTDRNVTQSVKLSVHSSSEYDKRFCENPSIQTGKKGCTHTKPHRICCPQSFHRGQQKGVAGRKAYQYTECGESFTCGSHLDLTHTGEKLYKCTECGKTFSLVANLTDHLQTHKEEKSHKCTECGKSFKRSSNLIRHQQTHTGEKLYKCTECGKTFNLVANLTDHLQTHKEEKSHKCTECGKSFKRSSNLIRHQQTHTGEKLYKCTECGKSFSLSSSLSQHKHIHTRQKACKC…							1/1:1:40	1.8e-08	ERTFQDIEAFFTKDEWQELQDWEKEVYRDIKEHYDTIISF	1/1:3:40	2e-16	TFQDIEAFFTKDEWQELQDWEKEVYRDIKEHYDTIISF	1/1:3:40	1.4e-10	TFQDIEAFFTKDEWQELQDWEKEVYRDIKEHYDTIISF	1/1:3:40	2.4e-24	TFQDIEAFFTKDEWQELQDWEKEVYRDIKEHYDTIISF	1/1:3:40	3.7e-28	TFQDIEAFFTKDEWQELQDWEKEVYRDIKEHYDTIISF
455	lcha ZNF		JH127032.1(1104755-1106717;+)	lcha	Latimeria chalumnae	Coelacanth	Sarcopterygii (lobe-finned fishes)		TLAGSSSHKTMEMVNLGGETEELFFVNPVVVCDRASARSQEETSNMPANPDQLQTEEMFEDIKIYFTKAEWAELQDWEKEVYRSLKEHYDIIISFGYYISKPDFMSKIRINHQASDCVSSFCSWDQLPIQPETNAVSKLIKYTFPIPCNIYPTNHVLIMENSGGVEQNGNAQQCTVQEFQERSTVQRKEHSFYSSSECKEKFNCLERFRRHLEIHNKQSLQTSYERERSHSKCVIVYQEEARGGERAEQQNCVESLTWSIYQPIEMGRKRGHCTEDQQLSGQQPSLLVQQSIHIGEKQQQAISSVRIIKHSSTFNKYQQILTAEKPYKCMECGKSCSRVEHLHIHKLLHTGEELYKCTVCGKSVLDVWNHHAHKQNHTGEKPSKCMECGKSFIYGRSLY…							1/1:1:40	1.2e-08	EEMFEDIKIYFTKAEWAELQDWEKEVYRSLKEHYDIIISF	1/1:3:40	1.6e-17	MFEDIKIYFTKAEWAELQDWEKEVYRSLKEHYDIIISF	1/1:3:40	1.3e-10	MFEDIKIYFTKAEWAELQDWEKEVYRSLKEHYDIIISF	1/1:3:40	1.9e-23	MFEDIKIYFTKAEWAELQDWEKEVYRSLKEHYDIIISF	1/1:3:40	1.1e-27	MFEDIKIYFTKAEWAELQDWEKEVYRSLKEHYDIIISF
456	lcha ZNF		JH127032.1(1122077-1124542;+)	lcha	Latimeria chalumnae	Coelacanth	Sarcopterygii (lobe-finned fishes)		TLAGSSSHKTMEMVNLGGETEELFFVNPVAVCDRASACSQEETSNMPANPDQLQTEETFEDIKIYFTKAEWAELQDWEKEVYRSLKEHYDIIISFGYYISKPDFMSEIRINHQVSDCVSSLCSWDQLPIQPENNAVSKLIKSTFPVPSNIHPKNHVLIMKNSGGVEQNGNAQQCTVQEFQERSTVQRKEHSFYSCSECKEKFNCLERFRRHLEIHNKQSLQTSYERERSHSKCVIVYQEEARGGERAEQQNCVESLTRSIYQPIEMGRKRGARRKEDRQLSGQQPSQLVQQSIHIGEKQQKSTASVRIIKRSSTFNKYQQILTAEKPYKCTECGKSFSYLRNLKRHEQSHTGEKPYKCTECGKSFRQVGNLKIHEQIHTGEKPYKRTECGKRSSHKGIF…							1/1:1:40	3.2e-09	EETFEDIKIYFTKAEWAELQDWEKEVYRSLKEHYDIIISF	1/1:3:40	6.4e-18	TFEDIKIYFTKAEWAELQDWEKEVYRSLKEHYDIIISF	1/1:3:40	5.7e-11	TFEDIKIYFTKAEWAELQDWEKEVYRSLKEHYDIIISF	1/1:3:40	1e-23	TFEDIKIYFTKAEWAELQDWEKEVYRSLKEHYDIIISF	1/1:3:40	2.5e-28	TFEDIKIYFTKAEWAELQDWEKEVYRSLKEHYDIIISF
457	lcha ZNF		JH127214.1(430212-432608;+)	lcha	Latimeria chalumnae	Coelacanth	Sarcopterygii (lobe-finned fishes)		CSFVNYCRNCQRTENHRTIQVTAEEEEGGFLLLVPVWKKAIVCNWEETEKMTVNPVQREMKTKFEDIEIFFTKDVWEELQDWEKEVYRDIKEHYDTIVSFGYDVPKPDFMCEVEETHHVPVYKPSTCKKEFSPPVLAESNLLSDTNESPSSSSSDVNPVSRNIATGSTEGQRINPSIQHFNTCQQTDLEQKPYICTTCGLVFSELSTLNTHMQIHTADKLYKCAVCGKGFKHLSDLKRHQQIHTAEKPYKCAVCGKSFRHSSDLKQHQRIHTGEKLYKCTVCGKSFIYLSKLKRHQKIHTGEKMYKCTMCEKSFIHSSKFKQHQQIHIGEKPYKCTVCEKSFIYSSKLKHHQQIHTGEKPYKCTLCEKSFIYSSKLKRHQKIHTGVKPYKCTVCEKSFM…							1/1:1:40	8.1e-08	KTKFEDIEIFFTKDVWEELQDWEKEVYRDIKEHYDTIVSF	1/1:3:40	2.8e-15	KFEDIEIFFTKDVWEELQDWEKEVYRDIKEHYDTIVSF	1/1:3:40	6e-09	KFEDIEIFFTKDVWEELQDWEKEVYRDIKEHYDTIVSF	1/1:3:40	1.3e-23	KFEDIEIFFTKDVWEELQDWEKEVYRDIKEHYDTIVSF	1/1:3:40	3.7e-27	KFEDIEIFFTKDVWEELQDWEKEVYRDIKEHYDTIVSF
458	lcha ZNF		JH127214.1(439581-441225;+)	lcha	Latimeria chalumnae	Coelacanth	Sarcopterygii (lobe-finned fishes)		CSFVNYCRNCQRTENHRTIQVTAEEEEGGFLLIVPVWKKAIACDQEETEKMAVNPSQREMKKTFADIEIFFTKDVWEELQDWEKEVYRDIKEHYDTIISFGYNVPKPDFMCKVEETHHILAYKPSTRKKELSSPVLAESNLVSDINESQRHQQIPTGDKPYKCVECKKSFRCPSELQQHQRIHTGEKPYKCSECGKSFACSSVLKRHQKIHTGEKPYKCTECEKSFISTSFLKQHQKIHTGEKPYKCTKCEKSFRYLRSLQQHCETHTRKEIKIQSVKNFRYSLHIKRHHRIHTGEKPYKCIECGKSFGTSSHLNQHQRIHTAEKLYKCTECGKCFKTSSYLNQHQQIHREENPYKCTVCEKSFKTSSHLNRHQQIHTGEKPHECTECGKSFIFLSDLK…							1/1:1:40	3.2e-07	KKTFADIEIFFTKDVWEELQDWEKEVYRDIKEHYDTIISF	1/1:3:40	6.5e-16	TFADIEIFFTKDVWEELQDWEKEVYRDIKEHYDTIISF	1/1:3:40	7.5e-09	TFADIEIFFTKDVWEELQDWEKEVYRDIKEHYDTIISF	1/1:3:40	5.5e-24	TFADIEIFFTKDVWEELQDWEKEVYRDIKEHYDTIISF	1/1:3:40	4.2e-28	TFADIEIFFTKDVWEELQDWEKEVYRDIKEHYDTIISF
459	lcha ZNF		JH127214.1(448756-449911;+)	lcha	Latimeria chalumnae	Coelacanth	Sarcopterygii (lobe-finned fishes)		FCELLQELSEDRKPQDNTIQVTAEEGGFLLTVPVWKKDIVCNQEETEKMTVNPAQREMKKIFEDIEIFFTEDVWEELQDWEKEVYRDIKEHYDTIVSFGYDVPKPDFMCEVEETHHVPAYKPSAREKEFSPPVLAESNLLSDTNESPSSSSFVSRNVAKGSTEGRRINPSIQHFNTRQQTDPEQKPYICMTCGMKFSKLSTLNVHTQIHTAEKPYKCAVCGKGFRHSSELKQHQPIHTGQRLHKCTECGQSFIYLSRLKEHQKIHIGEKPHKCSVCGKCFIYSSKLKLHQRIHTGEKPYKCTECGKCYMYSSKLKQHQKVHTGEKPYKCTECDKSFVYTSKLKQHQKIHTGEKPYKCTECEKGFMCLSQLKQHQNIHRGETPYKCTVCEKGFISSKKLK…							1/1:1:40	2.2e-07	KKIFEDIEIFFTEDVWEELQDWEKEVYRDIKEHYDTIVSF	1/1:3:40	5.5e-14	IFEDIEIFFTEDVWEELQDWEKEVYRDIKEHYDTIVSF	1/1:3:40	2.4e-08	IFEDIEIFFTEDVWEELQDWEKEVYRDIKEHYDTIVSF	1/1:3:40	8.1e-23	IFEDIEIFFTEDVWEELQDWEKEVYRDIKEHYDTIVSF	1/1:3:40	4.2e-26	IFEDIEIFFTEDVWEELQDWEKEVYRDIKEHYDTIVSF
460	lcha ZNF		JH127214.1(459468-459952;+)	lcha	Latimeria chalumnae	Coelacanth	Sarcopterygii (lobe-finned fishes)		KKFEDIEIFFTEDAWEELQDWEKEVYRDIKEHYDTIILFGYDVPKPDFMHKVEETRYIGTYIPM							1/1:1:40	7.8e-07	XKKFEDIEIFFTEDAWEELQDWEKEVYRDIKEHYDTIILF	1/1:3:40	5.7e-14	KFEDIEIFFTEDAWEELQDWEKEVYRDIKEHYDTIILF	1/1:3:40	1.9e-08	KFEDIEIFFTEDAWEELQDWEKEVYRDIKEHYDTIILF	1/1:3:40	1.4e-22	KFEDIEIFFTEDAWEELQDWEKEVYRDIKEHYDTIILF	1/1:3:40	1.8e-25	KFEDIEIFFTEDAWEELQDWEKEVYRDIKEHYDTIILF
461	lcha ZNF		JH127214.1(485254-487132;+)	lcha	Latimeria chalumnae	Coelacanth	Sarcopterygii (lobe-finned fishes)		FHELLQELSEDRKPQDNTIQVTAEEEEGGFLLTVPVWKKAIVCDWEKTEKMTVNPARGEMEKTFENIEVFFTEDVWEELQDWEKEVYRDIKEHYDTIVSFGYDVPKPNFMREVEETRHVPAYKPSAREKELSPLVLAESNPFSDPNESPSSSSSDVNPVSRNVATGSAERQRINPSVRHFSTRRRTHPEPKPYICTTCGMKFSKLSTLNAHTQIHTAEKPYKCAVCGKGFRHSSVFKLHLQIHTGQKLYKCTVCENRFTSSSDLKRHQQIHTGEGPYKCTVCGKSFRCSSDLKRHQEVHTGDKPYKCTECGKSFRRLRNLQQHCRIHGKKLNVKSLKYSLPVKRHQQVYKGKKCIECGKSFRYLSILKVHQRIHTGEKPYKCRECGKSFNTQSYLNRHQ…							1/1:1:40	7e-07	EKTFENIEVFFTEDVWEELQDWEKEVYRDIKEHYDTIVSF	1/1:3:40	3.2e-13	TFENIEVFFTEDVWEELQDWEKEVYRDIKEHYDTIVSF	1/1:3:40	4.3e-08	TFENIEVFFTEDVWEELQDWEKEVYRDIKEHYDTIVSF	1/1:3:40	4.5e-23	TFENIEVFFTEDVWEELQDWEKEVYRDIKEHYDTIVSF	1/1:3:40	3.5e-26	TFENIEVFFTEDVWEELQDWEKEVYRDIKEHYDTIVSF
462	lcha ZNF		JH127214.1(499423-500242;+)	lcha	Latimeria chalumnae	Coelacanth	Sarcopterygii (lobe-finned fishes)		EMEKTFADIEVFFTEDVWEELQDWEKEVYRDIKEHYDTIVSFGYDVPKPDFMREAEVTCCVPAYKPSSHEKEFSPPALAKSNPFSDPNESPSSSSSDVNPVSRNVATGSAEGQRINPSVRHFDTHQRTHPEPKPYTCTMCGMKFSKLSALNAHTHIYTAEKPCKCVACGKGFRYSSGLKRHERVHTAEKPCKCAVCGKGFKHSSDLKHHQQIHTGQKLYKCTVCEKSFRCSSDLKRHQRIHTGEKTCQCTVCGKGFANSSDLTRHQRIHTGQKPYKCTVCEKSFRCSSALKKHQRIHTGEKPFKCTECEKSFMYASRLKRHQQFHTGQKPYKCTECRKSFVYSSDLKRHKQIHTGEKPYRCRECEKRFIYSSDLKRHQQVHTREKP							1/1:1:40	1.6e-07	EKTFADIEVFFTEDVWEELQDWEKEVYRDIKEHYDTIVSF	1/1:3:40	2.5e-14	TFADIEVFFTEDVWEELQDWEKEVYRDIKEHYDTIVSF	1/1:3:40	1.4e-08	TFADIEVFFTEDVWEELQDWEKEVYRDIKEHYDTIVSF	1/1:3:40	2.9e-23	TFADIEVFFTEDVWEELQDWEKEVYRDIKEHYDTIVSF	1/1:3:40	6.5e-27	TFADIEVFFTEDVWEELQDWEKEVYRDIKEHYDTIVSF
463	lcha ZNF		JH127214.1(515896-516547;+)	lcha	Latimeria chalumnae	Coelacanth	Sarcopterygii (lobe-finned fishes)		SLCCLCSFVIYCRNHQRTIQVTAEEVEGGFLLLVPVWKKATACDQDEMEKMAVDPARGEMEKTFEDLEMFFTKDVWEELQDWEKEVYRDIKEHYDTLVSFGYDVPKPDFMREAEETRCVPAYKPSAREKEFSPPALADSNPFSGTNESPSSSSCDTNPVSGNVATGSAEGQRINPSFRHFGTRLRTDPEEKPYVCTACGMKFGQLSALSAHTQIHMAEKPCQHAACGKGFTSPSVLALRQEIHRGQTLYKCTECDKSFLWSSKLERXXXXXXXXXXXXXXXXXXXXXXXXXXXXXXXXXXXXXXXXXXXXXXXXXXXXXXXXXXXXXXXXXXXXXXXXXXXXXXXXXXXXXXXXXXXXXXXXXXXXXXXXXXXXXXXXXXXXXXXXXXXXXXXXXXXXX…							1/1:1:40	2.4e-07	EKTFEDLEMFFTKDVWEELQDWEKEVYRDIKEHYDTLVSF	1/1:3:40	1.1e-15	TFEDLEMFFTKDVWEELQDWEKEVYRDIKEHYDTLVSF	1/1:3:40	2.9e-08	TFEDLEMFFTKDVWEELQDWEKEVYRDIKEHYDTLVSF	1/1:3:40	1.1e-23	TFEDLEMFFTKDVWEELQDWEKEVYRDIKEHYDTLVSF	1/1:3:40	3.1e-27	TFEDLEMFFTKDVWEELQDWEKEVYRDIKEHYDTLVSF
464	lcha ZNF		JH127236.1(24643-26620;+)	lcha	Latimeria chalumnae	Coelacanth	Sarcopterygii (lobe-finned fishes)		IIYYRKQQRKNTFKTMEKLHKQEEVGVLHDAVAGTVQEKDGVSKQEGSKTETMDPVQRTKKAHGDIEVYFTKDEWEELQDWEKEVYRDIKEHYDVIVSFGYDVPKPDFMSEVEETHQFPVCLSTHFKQEESLLPENSLLSDVNESAWSPSLNLHPISNSANVEQSEEKRKEENKHQLAGQSLEMSTAQKNKNTTSYDCSDCGKQFRLSFHLQKHQYIHKGMKPSKCKKCRKGFRDLSVFTVPQQTHTGNKPCEYKECGKSFNNSSSFTKHQWIHTEEKPYLCTICGKSFRVSSDLTNHHQIHRGEKPYKHVECQKGFSNSSSLIRHQQIHTEEEPYNCVECGEDFTILPDLIRHQQIHTGEEPYKCVECGEDFTILPDLIKHQQIHTGEPYKCVECGEY…							1/1:1:40	3.3e-08	KKAHGDIEVYFTKDEWEELQDWEKEVYRDIKEHYDVIVSF	1/1:3:40	5.3e-17	AHGDIEVYFTKDEWEELQDWEKEVYRDIKEHYDVIVSF	1/1:3:40	3.1e-10	AHGDIEVYFTKDEWEELQDWEKEVYRDIKEHYDVIVSF	1/1:3:40	1.6e-23	AHGDIEVYFTKDEWEELQDWEKEVYRDIKEHYDVIVSF	1/1:3:40	3.3e-28	AHGDIEVYFTKDEWEELQDWEKEVYRDIKEHYDVIVSF
465	lcha ZNF		JH127236.1(46693-47572;+)	lcha	Latimeria chalumnae	Coelacanth	Sarcopterygii (lobe-finned fishes)		VIYCRKQQKKKSFRTMETVLKEGETGVFRSAVTETVRERDGVSRLVGAKQETLNPDQLTKRTHEDIKRYFTKDEWEELQDWEKEVYRDIKEHYDVIVSFGYNVPKPDFMSEVEETHQSPVCLSTHFKEEESLLPENKLFLDASESAWSPSSSIHPISNTVSVEQSERNQKKKKKRQRPEQNFMETSTVQKKTPTFYDCSECGKSFRLAVHLHKHQDIHKGKEQNKCRMSLRDLPVRIIHQQIQTRKKLNTESRKSLRTSSDFNNHLQIQREKPYNNTVCGKSFRNASDCSKHQRIQSGNKRYKCVECGKSFKRSAYLITHQQIHTGEKPYNCFECGKSFRLSTGLKRHQQIHTGEKPYKCTECGKSFRNSSNLIRHQRVHTGEKPYKCTECGKSFSHSS…							1/1:1:40	1.2e-07	KRTHEDIKRYFTKDEWEELQDWEKEVYRDIKEHYDVIVSF	1/1:3:40	1.2e-16	THEDIKRYFTKDEWEELQDWEKEVYRDIKEHYDVIVSF	1/1:3:40	1.3e-10	THEDIKRYFTKDEWEELQDWEKEVYRDIKEHYDVIVSF	1/1:3:40	9.6e-24	THEDIKRYFTKDEWEELQDWEKEVYRDIKEHYDVIVSF	1/1:3:40	9.5e-28	THEDIKRYFTKDEWEELQDWEKEVYRDIKEHYDVIVSF
466	lcha ZNF		JH127236.1(69721-70624;+)	lcha	Latimeria chalumnae	Coelacanth	Sarcopterygii (lobe-finned fishes)		CNNAIIEIAVCISDLHSNRADFQRICASCDSYHCALVIILIYCRKYRRNGSHRIMEALSQEEDTEVVLAVKRNPVREGVGVNCVETRNSSVISDRLEMEKMFEDIKMFFTRNVWEELQDWEKEVYWDIKEHYDTIISFGYNVPKPDFMSEVEEAHQVPGCSREGGASRLPGNSLIGDANKSPSSRSDVHPRGNNTTVEQSKGNQKANNIQLSGEPLGERKMEPSNGKNSLRNRSEGKKHFRHSPKFEAHQEVHRGKKAGQSLESEKEFCHLRHLKRHKTAHSGESRNKCTECGKYFSRLETLKRHILIHKGEKPYKCKDCEKSFRASSNLNRHQRIHTGEKPYRCKECGKSFRDSSNLNTHQRIHTGEKPYKCADCGKCFICSSDLNTHQRIHTGEKPY…							1/1:1:40	1.8e-06	EKMFEDIKMFFTRNVWEELQDWEKEVYWDIKEHYDTIISF	1/1:3:40	7.7e-12	MFEDIKMFFTRNVWEELQDWEKEVYWDIKEHYDTIISF	1/1:3:40	1.5e-08	MFEDIKMFFTRNVWEELQDWEKEVYWDIKEHYDTIISF	1/1:3:40	1e-22	MFEDIKMFFTRNVWEELQDWEKEVYWDIKEHYDTIISF	1/1:3:40	2.4e-25	MFEDIKMFFTRNVWEELQDWEKEVYWDIKEHYDTIISF
467	lcha ZNF		JH127236.1(98039-102838;+)	lcha	Latimeria chalumnae	Coelacanth	Sarcopterygii (lobe-finned fishes)		RRSNEMMEVTLQEEEMGAVPVVKAEPVSEGDCIKSEEETQNRTMNPDQLEKEQTFEDIETYFSKGEWDELQDWEKEVYRDIKEHYDIILLLGYNIPKPDFMSEVEESHQPPVSGSTDCTEDGSPLLIENSLSADTDVSKSSMSSGNHLDSNNAKANQKKNSMQQCAEGTCKCTECTKFSFCLETVKGEKSYKCTDCGKSFGYMRKLEIHQQIHTGEKPYKCTECGKRFRDTSGLNAHQRIHTGEEPYKCTECGKSFRWAEQFRRHQIVHSGEKPYKCTECRKSFRWCEQLHRHQLVHSGEKCNECTVCGKRFGXXXXXXXXXXXXXXXXXXXXXXXXXXXXXXXXXXVLHSHQPITHTREVTQKMNHANLQTMGRVLEIVQTLVNTNVSTQERNYINVQ…							1/1:1:40	1.1e-08	EQTFEDIETYFSKGEWDELQDWEKEVYRDIKEHYDIILLL	1/1:3:40	1.2e-15	TFEDIETYFSKGEWDELQDWEKEVYRDIKEHYDIILLL	1/1:3:40	1.4e-11	TFEDIETYFSKGEWDELQDWEKEVYRDIKEHYDIILLL	1/1:3:40	5e-22	TFEDIETYFSKGEWDELQDWEKEVYRDIKEHYDIILLL	1/1:3:40	1.3e-26	TFEDIETYFSKGEWDELQDWEKEVYRDIKEHYDIILLL
468	lcha ZNF		JH127236.1(185004-187324;-)	lcha	Latimeria chalumnae	Coelacanth	Sarcopterygii (lobe-finned fishes)		KGAEGCSKEQIKNVTADPNQLRMGKPLEDIEVYFTKDEWEELQDWEKEVYRDLKEHYDVIISLGYNIEKPVFMFKIEETYQLPVHDSSYSTVDEFLKRPEHISCGVETKSEENRNKIINQEWPLALNRHQKERKGEKQYKSTQCGKSFEKSSRLNEHKQIHAGKKTYKCEECGKSFRNSSQLNQHEQIHAEKKACKCTECGKSFRNSSHLHQHKRIHTGEKPYKCTECGKSFRNSSHLSQHQQNHAETRLCKCNKCGKRFSQTSSLYLHKRTHREKRYKCSKCWKTFKLLQNLKRHQHKHTGVKSYKCSECGKAFNWSCGLMFHKKTHTGEKPYKCTECGKCFSRAWVLSVHNRTHTGEKPYTCEECGKSFSQSPTLVSHRRIHMGKKPYKCSECRESL…							1/1:1:40	6.9e-09	GKPLEDIEVYFTKDEWEELQDWEKEVYRDLKEHYDVIISL	1/1:3:40	1.7e-16	PLEDIEVYFTKDEWEELQDWEKEVYRDLKEHYDVIISL	1/1:3:40	5.3e-11	PLEDIEVYFTKDEWEELQDWEKEVYRDLKEHYDVIISL	1/1:3:40	2.1e-23	PLEDIEVYFTKDEWEELQDWEKEVYRDLKEHYDVIISL	1/1:3:40	3.6e-28	PLEDIEVYFTKDEWEELQDWEKEVYRDLKEHYDVIISL
469	lcha ZNF		JH127236.1(216291-217107;+)	lcha	Latimeria chalumnae	Coelacanth	Sarcopterygii (lobe-finned fishes)		MFINDQLEEKAGALLVSRMERLWEGPEVCGQEETRNGTIDPDQLEIKKTFEDIEMYFTEDLWEELQDWEKEVYRDIKEHYDVIISLGYKVEKPIFMFKSEKINQPPVFDSSCVKVEESLTNTDNIMVSNANKSPSSICSKIPCSNKNGTREKSEAKQQENVDPFGSQASKETVALQNCDSSEWEYKDSHPGNHQRDQQIQPGKASNSLGCEGNNSCLHRGFQHREKPQYQQSNAAEKTPNSTECGKRDCEAGGLKHSPLHSREKLYEWTTCGNSFKCPVEFNRHQKVHKREKQYTSTACGKSFQNSSHLHQPQKVYTRKKIYKCTECEKSFISSSILVKHQRTHSGEKPYVCTDCGKSFSQITTLNTHQRIHTGEKPYQCTDCGKYFRALSTLRSHCRI…							1/1:1:40	8.8e-09	KKTFEDIEMYFTEDLWEELQDWEKEVYRDIKEHYDVIISL	1/1:3:40	1.3e-15	TFEDIEMYFTEDLWEELQDWEKEVYRDIKEHYDVIISL	1/1:3:40	3.7e-10	TFEDIEMYFTEDLWEELQDWEKEVYRDIKEHYDVIISL	1/1:3:40	9.9e-24	TFEDIEMYFTEDLWEELQDWEKEVYRDIKEHYDVIISL	1/1:3:40	1.5e-27	TFEDIEMYFTEDLWEELQDWEKEVYRDIKEHYDVIISL
470	lcha ZNF		JH127236.1(244736-245636;+)	lcha	Latimeria chalumnae	Coelacanth	Sarcopterygii (lobe-finned fishes)		DGSRNTAMEEPLQEGKAGALLVSQMERLWEGAEVCGQEETRNGSTDTDQPERKKTFEDIEMYFTEDLWEELQDWEKEVYRDIKEHYDVIISLGYKAEKPIFMFKSENINQPPVFDSSCVKVEESLINTDYIMVSNANKSPSSICSKIPCSNKNGTREKSEAKQQGNVDPFGSQASKETVALQNCDSSEWEYKDSHPGNHQRDQQIQPGKASNSSGSEGNNSCLHRGFQHREKPQYQQSNAAEKTPNSTECGKRDCEAGGLKHSPLHSREKLYGWTTCGNSFKCPVEFNRHQKIHKREKQYTGKACGKSFQNSSHLHQPQNVYTRKKIYKCTECGKSFINSSVLVKHQRTHSGEKPYVCTDCGKSFSQITTLNTHQRIHTGEKPYQCTDCGKYFRELSIL…							1/1:1:40	8.8e-09	KKTFEDIEMYFTEDLWEELQDWEKEVYRDIKEHYDVIISL	1/1:3:40	1.3e-15	TFEDIEMYFTEDLWEELQDWEKEVYRDIKEHYDVIISL	1/1:3:40	3.7e-10	TFEDIEMYFTEDLWEELQDWEKEVYRDIKEHYDVIISL	1/1:3:40	9.9e-24	TFEDIEMYFTEDLWEELQDWEKEVYRDIKEHYDVIISL	1/1:3:40	1.5e-27	TFEDIEMYFTEDLWEELQDWEKEVYRDIKEHYDVIISL
471	lcha ZNF		JH127236.1(283021-283924;-)	lcha	Latimeria chalumnae	Coelacanth	Sarcopterygii (lobe-finned fishes)		ESSSHASTEEPLQEGKAGLLFVPEMERVWEGADVCSQEGAKNMTADPDQLEMERTFVDIERYFTNDEWEELQDWEKEVYRDIKEHYDVIISFGYEVDKPEFMSKIEETCPLPLRDLTRGKEDETLMKPKHTTTSNTNQSSISISCSIQLSSRSGIVEQPKGDPKKGNIGECQLKSHKETQSTKSGENGTFCDCFDCRDNLKEHEEMQERLSEDSRWERDSSHLQSNLLHQEEPRCQNMSTAERALRNANPRKSACGKTGLKKQRGTQLGEKPHKRSEHGKRFQSPSSLKAHQRTFTGRKPPKLTERKKSFRGSSHLNRHQQIQSGKKPYKCTECEKSFRQSSKLNIHRRIHTGEKPYKCKECGMCFSQIGNLNLHQRIHTGEKPYKCTECVKSFRWIGN…							1/1:1:40	2.9e-07	ERTFVDIERYFTNDEWEELQDWEKEVYRDIKEHYDVIISF	1/1:3:40	5.4e-16	TFVDIERYFTNDEWEELQDWEKEVYRDIKEHYDVIISF	1/1:3:40	1.5e-10	TFVDIERYFTNDEWEELQDWEKEVYRDIKEHYDVIISF	1/1:3:40	1.9e-23	TFVDIERYFTNDEWEELQDWEKEVYRDIKEHYDVIISF	1/1:3:40	1.6e-27	TFVDIERYFTNDEWEELQDWEKEVYRDIKEHYDVIISF
472	lcha ZNF		JH127445.1(63742-64477;+)	lcha	Latimeria chalumnae	Coelacanth	Sarcopterygii (lobe-finned fishes)		TNSRISFVYRMNRSSGCQKRKGRSLEEEAGVPFVAVMEPVRKRFCLNNRETGQMVAGIESVYKGRCMDGQEDTGHVQTKTEPAQSGDHAGYQEETGHKLAEMKAVYKRELFGSQGETRHAAVGTEAVYERHCVNSQETGHSSTKPEPVCKRDCTDSQVEIRQGLPEAEPVYKRDSFDSHEETRERTAETEAVYERDCIYSQVETRQRLAGAAPVSYNIDHVSCTSLENERRRAIEDQVYKSHHVGSQETGDRTVYPEHFKMENVFKDIEMYFTKDVWEELQHWEKEVYKDIKEHYDTIILHGYEIPKPDFMLEVEELHKPPPCESNQSREDEFPATPEDTKDQSSLKISPNNWPMGANAIAEQWAREQKRGNAQQFDMQCLERNTVQNTDNSRVHDCSD…							1/1:1:40	3.2e-06	ENVFKDIEMYFTKDVWEELQHWEKEVYKDIKEHYDTIILH	1/1:3:40	1.1e-13	VFKDIEMYFTKDVWEELQHWEKEVYKDIKEHYDTIILH	1/1:3:40	3.5e-09	VFKDIEMYFTKDVWEELQHWEKEVYKDIKEHYDTIILH	1/1:3:40	8.1e-22	VFKDIEMYFTKDVWEELQHWEKEVYKDIKEHYDTIILH	1/1:3:40	7.5e-25	VFKDIEMYFTKDVWEELQHWEKEVYKDIKEHYDTIILH
473	lcha ZNF		JH127445.1(77834-79070;+)	lcha	Latimeria chalumnae	Coelacanth	Sarcopterygii (lobe-finned fishes)		QQQLEDKVQATSGEGGSGAACGCSGGGLGRKAAVRSREKAKHRTANPDQPEMERPFEDIEMYFSKDVWKALEDWEKEVYWDIKEHYDILISYGYEVPKPDFMCVSEETQQPAVGELANGKQAGSPVLTGQLLARDACDFLLSVSSNTKPDSKGVLSEPSREQKEGNAQQFVLQSLESSTKVNTTKSPFHECTSGRYKVTCPENPQKRHQVPQLKTNDVLMYGGPLQDQEGPAGAELENSEEYLSVKHSEHQHKKTGKKHLASNVDQQLCGQQPFEDEQEDQCVPPEKKSYNCKECGKSYRSSSGLYIHQRVHTGEKPYECKECRKSFAHLGSFNVHKQTHRGEKLYLCTICGKSYRFSSGLYIHQRSHTGVKPYKCKECEKCFTQLGHLISHQQTHTGE…							1/1:1:40	1e-06	ERPFEDIEMYFSKDVWKALEDWEKEVYWDIKEHYDILISY	1/1:3:40	1.2e-11	PFEDIEMYFSKDVWKALEDWEKEVYWDIKEHYDILISY	1/1:3:40	2.3e-09	PFEDIEMYFSKDVWKALEDWEKEVYWDIKEHYDILISY	1/1:3:40	1.1e-20	PFEDIEMYFSKDVWKALEDWEKEVYWDIKEHYDILISY	1/1:3:40	3e-23	PFEDIEMYFSKDVWKALEDWEKEVYWDIKEHYDILISY
474	lcha ZNF		JH127445.1(91295-92189;+)	lcha	Latimeria chalumnae	Coelacanth	Sarcopterygii (lobe-finned fishes)		ERVTELIEMVSCRMQQRSGSQKVINKLKKEAAAPLVVAVEADWGDAAVRSREETRQQTVNPDQPAMERTFEDIEIYFPKDVWEELQDWEKEVYRDIKEHYDIVISLGYEVPKPDFMCMFEEAGEKPYKCTKCGKSYRFSSGLYVHQRTHTGEKPYKCKECGKSFAHVGSLKVHKHTHKGEKAYKCTECGKSYRFSSGLYIHQRSHTGEKPYKCKECGKSFAQLGHLTSHVQLHTGEKPYTCAECGKGFRRPSRLKSHERIHTKETTYKCTEGGKVCKRSSVLNGHKKMQTEPYICECGKTFRFSSSFKRHQQTHTGEKPYNCKECGKSFSLPGGLNVHQHTHTGEKPCKCTECGKSFRWSSELHVHQRIHTGEKPYPCVECGKSFRSASYLHKHQQVHK…							1/1:1:40	2.7e-08	ERTFEDIEIYFPKDVWEELQDWEKEVYRDIKEHYDIVISL	1/1:3:40	3.6e-16	TFEDIEIYFPKDVWEELQDWEKEVYRDIKEHYDIVISL	1/1:3:40	3.3e-10	TFEDIEIYFPKDVWEELQDWEKEVYRDIKEHYDIVISL	1/1:3:40	1.7e-23	TFEDIEIYFPKDVWEELQDWEKEVYRDIKEHYDIVISL	1/1:3:40	2.8e-28	TFEDIEIYFPKDVWEELQDWEKEVYRDIKEHYDIVISL
475	lcha ZNF		JH127450.1(399454-400102;-)	lcha	Latimeria chalumnae	Coelacanth	Sarcopterygii (lobe-finned fishes)		NDFIAEIGRVNSRLRTMKSQPQDGETDCVGGEEEKTRKRTTNPDPFEMEKKFQEIQKYFNKDEWEELQDWEKEVYSDIKEHYDTIIALGYDVPKPDFMVRPEDPHQLLVCSERSEQQQIPSLGKLYEGKEIGKKLSFPSEVKTLRVDSADKPYRCTECGKHFTHLASLRSHQTIHTGQKPHRCTECGKSFTYLASLTSHQLVHAGKKHACVECGKVFDFQSKLKTHQLTHTGEKPYRCVECGMSFAQEGNLKSHQRTHTGEKPYTCAECGKSFSQEGNLKLHLRIHTGEKPYRCSQCGKSFINNEYLKLHQRTHTGEKPYCCGDCGKGFARKGGLNVHQRIHTGEKPYQCGECGKSFTHRVSLNSHQHHH							1/1:1:40	6.1e-06	EKKFQEIQKYFNKDEWEELQDWEKEVYSDIKEHYDTIIAL	1/1:3:40	2.4e-14	KFQEIQKYFNKDEWEELQDWEKEVYSDIKEHYDTIIAL	1/1:3:40	1.9e-12	KFQEIQKYFNKDEWEELQDWEKEVYSDIKEHYDTIIAL	1/1:3:40	1.2e-21	KFQEIQKYFNKDEWEELQDWEKEVYSDIKEHYDTIIAL	1/1:3:40	1.6e-25	KFQEIQKYFNKDEWEELQDWEKEVYSDIKEHYDTIIAL
476	lcha ZNF		JH127450.1(425133-425877;-)	lcha	Latimeria chalumnae	Coelacanth	Sarcopterygii (lobe-finned fishes)		VSTRGAPESSDSQPPPPKIESIHLHFTLNLTTLGIRRSTSRIEPMALGNRASALSTQSPGGSLAFGISDLATKFLDFSLAEIDRRAADRRTMEKLVPDGEAAVLVVKSEPVWEMDCVDGEEETRNGATNPDPFEMRKRFQEIEKYFSKDEWEGLQDWEKEVYSDIKEHYDVVIAWGHDVPKPDFMLEIEETFQLPEYKYAYSKEDEAGVIFESNLVTVASELPVNIPPNTNGSGGEVQVKPLEGKQAEANSCPSVVLTFKKPSAVRNNVSLTFHHLCECTFKFPCLKNIRDQETVCQKNHKWHAACQRNCNCARKDFQPQASVRVQPPPPAPRATKKASLSSARHHKPHPKQRAYKYIDYSNRFSQQSSRGAEFPAGETYTCTSCGKCYSQLASLKAHE…							1/1:1:40	9e-06	RKRFQEIEKYFSKDEWEGLQDWEKEVYSDIKEHYDVVIAW	1/1:3:40	1.8e-13	RFQEIEKYFSKDEWEGLQDWEKEVYSDIKEHYDVVIAW	1/1:3:40	2.2e-11	RFQEIEKYFSKDEWEGLQDWEKEVYSDIKEHYDVVIAW	1/1:3:40	6.1e-21	RFQEIEKYFSKDEWEGLQDWEKEVYSDIKEHYDVVIAW	1/1:3:40	2.7e-24	RFQEIEKYFSKDEWEGLQDWEKEVYSDIKEHYDVVIAW
477	lcha ZNF		JH127450.1(438560-439883;-)	lcha	Latimeria chalumnae	Coelacanth	Sarcopterygii (lobe-finned fishes)		NDFIAEIGRVNSRLRTMKSQPQDGETDCVGGEEEKTRKRTTNPDPFEMEKKFQEIQKYFTKDEWEELQDWEKEVYSDIKEHYDTIIALGYDIPKPDFMSKLQETCQQPMCKPTNTKEKLHEETETGEKAHRCKKCGRVFPQLANLKSHQLVHKGEKPHKCAECGRTFDLLSQFKTHQQNHMGEKPYKCTVCQKSFVSSSKLKTHQRIHTGENPYTCVQCGKSFTQKGHLKSHHQTHTGVKPYHCMDCGKRFTQVSSLKLHRMLHTGERPFKCAECGKNFLSSSQLIKHQQNHVAEKAYSCLDCGKSFTQKGQLELHHRIHTGEKPYKCTECGKSFSQLASLNRHQLVHSGEKAYHCPHCGKGFTQEAYLNSHLQNHMGEKPHKCTDCGKSFIYRASLKV…							1/1:1:40	1.4e-06	EKKFQEIQKYFTKDEWEELQDWEKEVYSDIKEHYDTIIAL	1/1:3:40	6.7e-16	KFQEIQKYFTKDEWEELQDWEKEVYSDIKEHYDTIIAL	1/1:3:40	1.6e-12	KFQEIQKYFTKDEWEELQDWEKEVYSDIKEHYDTIIAL	1/1:3:40	3.5e-22	KFQEIQKYFTKDEWEELQDWEKEVYSDIKEHYDTIIAL	1/1:3:40	2.1e-26	KFQEIQKYFTKDEWEELQDWEKEVYSDIKEHYDTIIAL
478	lcha ZNF		JH127450.1(476506-480382;+)	lcha	Latimeria chalumnae	Coelacanth	Sarcopterygii (lobe-finned fishes)		CDEMLLFCRSQRNSSIPRKMEGLLQDGEVDVPFYSDEVELVWETASDGSQEEAISPSGQLEMKTFGGIEIYFSKEEWEELQDWEKEVYRDVKEHYDTVISLGYHITKPDFMSKVEDTHLFPLHESIYSEENEFLAIPSSGTIYNGNEFPVTLNVHDTGKSSVEAAERREQFMVYSFEETSAVQNNNVIALHPFSECLSEPADLENITRSQQILQKIPRELTCHQNCSQLNNSFQFQRQPTKILQHESVRSMMGSVHPPNGMGECSNSVKVHDKLKGRSSETGFSQLGGLGVEHHSRAIEKLCVCGKCKKSFIPGNFSSHQCRQREKPLHQCTECGKIFSRLGGLVSHQRIHTGEKPFQCADCGKRFTQQGNLKTHQRIHTGEKPYECRECGCHFTFLAQ…							1/1:1:40	2.3e-11	MKTFGGIEIYFSKEEWEELQDWEKEVYRDVKEHYDTVISL	1/1:3:40	2.1e-18	TFGGIEIYFSKEEWEELQDWEKEVYRDVKEHYDTVISL	1/1:3:40	1.1e-11	TFGGIEIYFSKEEWEELQDWEKEVYRDVKEHYDTVISL	1/1:3:40	1.7e-22	TFGGIEIYFSKEEWEELQDWEKEVYRDVKEHYDTVISL	1/1:3:40	2.5e-28	TFGGIEIYFSKEEWEELQDWEKEVYRDVKEHYDTVISL
479	lcha ZNF		JH127450.1(508964-513449;+)	lcha	Latimeria chalumnae	Coelacanth	Sarcopterygii (lobe-finned fishes)		TSPFCKTSPDSAGPPHEGNEGLIAVANTIPVWKGACNSCGTRNRIMSLNSFETERVFQGIEAYFTKDEWEELQDWEKEVYRDIKEHYDTVISFGYEVPKPDFMSSIEDTHLLPPYESTDSEPGSSVLPKNKTIPNDSESLVTICANSMGNFFMEQSEVKEQFVVHAFEDSRTVQNNKLITACPSPERLLKRAYREDVKRSQQILQKNPKEYTYYQNCSHADLQHQKEPTKEMQHESVKSIIDGVRQPSETGECSLKAHSELTGEALQRYGESKTGLGQLGGLGAEQRIRTAEKLYICEGCGKSFTQGNLHSHQCIQAKKKPYQYKECGKRFGFPSQLQRHQRIHTGEKPFKCTECGKCFTQQGNLYTHQQVHKGQKENKHAAYGKRFSYLESYQLMHSV…							1/1:1:40	5.8e-07	ERVFQGIEAYFTKDEWEELQDWEKEVYRDIKEHYDTVISF	1/1:3:40	1.3e-15	VFQGIEAYFTKDEWEELQDWEKEVYRDIKEHYDTVISF	1/1:3:40	1e-10	VFQGIEAYFTKDEWEELQDWEKEVYRDIKEHYDTVISF	1/1:3:40	1.7e-23	VFQGIEAYFTKDEWEELQDWEKEVYRDIKEHYDTVISF	1/1:3:40	2.3e-27	VFQGIEAYFTKDEWEELQDWEKEVYRDIKEHYDTVISF
480	lcha ZNF		JH127578.1(16235-17973;+)	lcha	Latimeria chalumnae	Coelacanth	Sarcopterygii (lobe-finned fishes)		LIYYRKRQRENIYRTMEKLPKEGDALVLHDVVIEPAQEQESVSKVERAKNKTTNADELNKKTHEDIQMYFTEDEWEELQDWEKKVYRDIKEHYDVIVSFGYDAPKPDFMSEVEETHQFPVCLSTRFKQEESLLPENSPFSDEYECTLSPYSNSHPISNSVNVDQSEGQQKEENEYRLAEQRFMEAIMLQKIKNEPLYDCSECGKHFSQSSDLSLHQKVQTLEKPSKCEECRRRLRGPTDLNAHEKIQTEEKPFNDVTFEREIQDSSDLHEHLQAEATQSHSTSEEREMSFSQSEDFIGQQYIYGADHSGNYSAVGNDLIPGLEHLTQQCQLHKGENAYECRICRKNFKDLSVVTIYQQIDTGEEMYKCTKCGKKFRNSSSLIIHHRVHMGEKPYRCEEC…							1/1:1:40	4.6e-09	KKTHEDIQMYFTEDEWEELQDWEKKVYRDIKEHYDVIVSF	1/1:3:40	1.5e-16	THEDIQMYFTEDEWEELQDWEKKVYRDIKEHYDVIVSF	1/1:3:40	6.3e-10	THEDIQMYFTEDEWEELQDWEKKVYRDIKEHYDVIVSF	1/1:3:40	3e-23	THEDIQMYFTEDEWEELQDWEKKVYRDIKEHYDVIVSF	1/1:3:40	8.3e-27	THEDIQMYFTEDEWEELQDWEKKVYRDIKEHYDVIVSF
481	lcha ZNF		JH127578.1(80212-81440;-)	lcha	Latimeria chalumnae	Coelacanth	Sarcopterygii (lobe-finned fishes)		KKNLFRTMEKLLREEETGVLHNAVKEPVQETEGVSRLGAARKWPRNPVQLTKRTHEDIESYFTKDVWEELQDWEKEVYRDIKEHYDVIISFGYDVPKPDFMSEVDETHRDPVYLSTHFKQEQSFLAENSLLSDVNESALSPYSSSHPFTYNANVKQSKGKQRKKNTSSCDCAECGKDCKRRKCLRESSIITVCQRINRGKKPYKCEECGRSFNNSSFLTNHQRIHTGEKPYQCTECGKSFRVSSDLTKHKRIHTGEKPYKCTECGKSFRISSNFIKHQRIHTGEKPHKCVECGRSFISSSGLFTHQRFHTGEKPYKCTKCGKSYRDSSSLTIHQRIHTGEKPYKCTECEKSFRTSSDLNKHQRIHTGEKPYKCVECEKSFSDSSSLIKHRRIHTGEKPY…							1/1:1:40	3.9e-06	KRTHEDIESYFTKDVWEELQDWEKEVYRDIKEHYDVIISF	1/1:3:40	6.2e-15	THEDIESYFTKDVWEELQDWEKEVYRDIKEHYDVIISF	1/1:3:40	3.6e-09	THEDIESYFTKDVWEELQDWEKEVYRDIKEHYDVIISF	1/1:3:40	1.1e-23	THEDIESYFTKDVWEELQDWEKEVYRDIKEHYDVIISF	1/1:3:40	2.4e-27	THEDIESYFTKDVWEELQDWEKEVYRDIKEHYDVIISF
482	lcha ZNF		JH127578.1(126585-128610;-)	lcha	Latimeria chalumnae	Coelacanth	Sarcopterygii (lobe-finned fishes)		IIYYRKQQKKNNFRTMETVLKEGETGVFCSAVTETVRERDGVSRLVGTKQETPNPDQLTKTTHGDIESYFTKDEWEELQDWEKEVYRDIKEHYDVIISFGYDVPKPDFMSEETHQFPVCLSTRFKEEGSLLPESSLFRDVNESALNPYSNSYPISNIVNMEQSEGEQKKENNYQHSEQSTMEMSTVQTNKTTTFYDCSECGKQFRLSIHLQTHLYIHKRTNPYKCKKCKKSFRDLSLLTIHQLTHSRKKSCKGKRFRTSSDLSKNQQIRTGEKHYNCVDSGKTLKDLPAHKIHQRIHTGEKPCKCTECRKSFRRSSDLNRHQRIHTGEKPYLCTVCGKSFRISSDLIKHHRIHTGEKPYKCVECGKNFNNSSSVIKHQRIHTGEKLYLCTVCGKSFRIS…							1/1:1:40	6.9e-07	KTTHGDIESYFTKDEWEELQDWEKEVYRDIKEHYDVIISF	1/1:3:40	1.8e-16	THGDIESYFTKDEWEELQDWEKEVYRDIKEHYDVIISF	1/1:3:40	3.4e-10	THGDIESYFTKDEWEELQDWEKEVYRDIKEHYDVIISF	1/1:3:40	7.4e-24	THGDIESYFTKDEWEELQDWEKEVYRDIKEHYDVIISF	1/1:3:40	5.1e-28	THGDIESYFTKDEWEELQDWEKEVYRDIKEHYDVIISF
483	lcha ZNF		JH127578.1(145150-146136;+)	lcha	Latimeria chalumnae	Coelacanth	Sarcopterygii (lobe-finned fishes)		MIYYRKLQKQSFRTMEKVLKEGETGVFRSAVTETVRERHGVSRLVGAKHETLNPDQLTKMTHGDIESYFTKDEWEELQDWEKEVYRDIKEHYDVIVSFGYDVPKPDFMSVVEETHQFPVCLSTRFKEEESLLPESSLFCDVNESALSPYSNSYPISNSANVEQSEGKQKKENNYQHSEQSTMEMSTVQTNKTTTFYDCSECGKQFRLSIHLQTHLYIHKRMNPYKCKKCKKSFRDLSHLTIHQVTHSRKKSCRDTESGKCLRTSSDLGENQQIHTGEKCYNYVDSGKTLKDLPTHKVHQHIHTGEKPYKCTECRKSFRRSSDLNRHQRLHTGEKPYLCTVCGKSFRISSDLIKHHRIHTGEKPYKCVECGKSFNNSSSFIKHQRIHTGEKPYKCAECGK…							1/1:1:40	8.1e-08	KMTHGDIESYFTKDEWEELQDWEKEVYRDIKEHYDVIVSF	1/1:3:40	3.5e-16	THGDIESYFTKDEWEELQDWEKEVYRDIKEHYDVIVSF	1/1:3:40	3.9e-10	THGDIESYFTKDEWEELQDWEKEVYRDIKEHYDVIVSF	1/1:3:40	1.2e-23	THGDIESYFTKDEWEELQDWEKEVYRDIKEHYDVIVSF	1/1:3:40	1.1e-27	THGDIESYFTKDEWEELQDWEKEVYRDIKEHYDVIVSF
484	lcha ZNF		JH127578.1(156340-157327;+)	lcha	Latimeria chalumnae	Coelacanth	Sarcopterygii (lobe-finned fishes)		SFGTMETVLKEGETGVFRSAVTETVRERDGVSRLVGTKHETPNPDQLTKRTHGDIESYFTKDEWEELQDWEKEVYRDIKEHYDVIISFGYDVPKPDFMSEVEETHQFPVCLSNRFKEEESLLPESSLFRDVNESALSPYSNSYPISNSANVEQSEGEQKKENNYQHSEQSTMEMSTVQTNKTTTFYDCSECGKQFRLSIHLQAHLYIHERMNPYKCKKCKKSFRDLSHLTIHQVTHSRKKSCRDTESGKCLRTSSDLSKNQKIHTGEKCYSCIDCGKTFKKLSTQKVHQQIHTGEKPYKCTECGKSFRSSSDLIKHHRIHTGEKPYKCVECGKNFNNSSSLNKHQRIHTGEKPYKCEECGKSFSNSSCLIKHQRIHTGEKPYKCLECGRSFRYDSVLKI…							1/1:1:40	8.8e-07	KRTHGDIESYFTKDEWEELQDWEKEVYRDIKEHYDVIISF	1/1:3:40	1.8e-16	THGDIESYFTKDEWEELQDWEKEVYRDIKEHYDVIISF	1/1:3:40	3.4e-10	THGDIESYFTKDEWEELQDWEKEVYRDIKEHYDVIISF	1/1:3:40	7.4e-24	THGDIESYFTKDEWEELQDWEKEVYRDIKEHYDVIISF	1/1:3:40	5.1e-28	THGDIESYFTKDEWEELQDWEKEVYRDIKEHYDVIISF
485	lcha ZNF		JH127578.1(177022-179003;+)	lcha	Latimeria chalumnae	Coelacanth	Sarcopterygii (lobe-finned fishes)		MIYYRNQQRKKSNGTMEKLLKEGETAPLPNAVIEPVRETDRGSRLKGAENKTRNPDQLTKKTHEDIERYFTKDEWEELQDWEKAVYRDMKEHYDVVVSFGYDIPKPDFMSEVEKSHQIPVCKSTHFTEEDSLLSEDSPFGDVNESVLNLSSRSHPITNTANVENAESNQKKENKHQLPVQSLMETSMTLNDENNISYICSDCGKYFSQSSDIYVHQEVQTLEEPPKCEECWGSLRVPLGLNSPAKIQTQEKPSKHMKYVKEIQDLTHLRKRLQTQTKKNHSESKVCERSFSRRKDLIIHQDMYRTDNSSNCSELESIIPRLERLTQESQIHTGQKPYEFSECGKSVKWSNHLEVLQHIQAGKKLCTCKECGKCLTQSHQLYTHQRIHTGEKPYKCTECG…							1/1:1:40	9.8e-09	KKTHEDIERYFTKDEWEELQDWEKAVYRDMKEHYDVVVSF	1/1:3:40	3.2e-17	THEDIERYFTKDEWEELQDWEKAVYRDMKEHYDVVVSF	1/1:3:40	8.5e-12	THEDIERYFTKDEWEELQDWEKAVYRDMKEHYDVVVSF	1/1:3:40	8.5e-23	THEDIERYFTKDEWEELQDWEKAVYRDMKEHYDVVVSF	1/1:3:40	3.8e-27	THEDIERYFTKDEWEELQDWEKAVYRDMKEHYDVVVSF
486	lcha ZNF		JH127578.1(199240-200221;-)	lcha	Latimeria chalumnae	Coelacanth	Sarcopterygii (lobe-finned fishes)		PSEKFQRQSSNRTMEVTPPREEATLVPVVKTEPVWARADVPSQEDAGDMSNDPDQLEMKKTLEDIEKYFTEDVWEELQDWEKEVYRDIKEHYDVIISLGYNAPKPDFMSEVEEAHQLPLCVSAYSAEDSSLTLPVNSLVSNKNSFSSHTRSLGNNDTMEQTEGKQNKEHPQQVVVRTCGEASMVQNDEDSTSAISAERVENGKCFRRSSYLDRHQQVHAENKPHKCTECGKSFRDSSDLERHQEAHRENKPHKCTECGKSFKKPSQLSIHQQIHTGEKPYKCTVCGKRFCQLGHLGTHQRIHTGEKPYKCKECGKCFRNSSTLYTHQRIHTGEKPYKCSECGKSFRNSSALYKHQRIHTGEKPYECTECGKSFRDSSTLYNHQRIHTGEKPYKCTECGK…							1/1:1:40	1.1e-06	KKTLEDIEKYFTEDVWEELQDWEKEVYRDIKEHYDVIISL	1/1:3:40	1e-14	TLEDIEKYFTEDVWEELQDWEKEVYRDIKEHYDVIISL	1/1:3:40	2.9e-10	TLEDIEKYFTEDVWEELQDWEKEVYRDIKEHYDVIISL	1/1:3:40	9.9e-23	TLEDIEKYFTEDVWEELQDWEKEVYRDIKEHYDVIISL	1/1:3:40	3.4e-27	TLEDIEKYFTEDVWEELQDWEKEVYRDIKEHYDVIISL
487	lcha ZNF		JH127578.1(225316-226387;-)	lcha	Latimeria chalumnae	Coelacanth	Sarcopterygii (lobe-finned fishes)		SGNLLHYLFQDMQRRNSHSAMEKLLQEETTILYNKETEFGWDGGGVSRLEEDQNKTINPDQLSKMTHGDLEMYFTKDEWEELQDWEKEVYRDIKEHYDVIISFGYDFPKPDFMAEVQGAYQPPLCKSAYSTEDWSLFPEKSLLSDANGSALHQSSNSHLFNYNVNLEQLEGKQEKENTQQFVHQTFRNTSVVQNNKNVTFYTCSECGKRFSRSSVLNIHQKVQTVEKPSKCRECWGILRDSSDLSTHKKLQAVEKATKSTKCEKKIQDSHDRHKPLQTQTRKKHYKPEACGESFSQRQNFIGHQKLDTANNPCKIAKHGKSISSLGIQKPISSIHVGEKLYKCSECGKSFKRSSYLNTHQQIHTGEKPYKCTECGKSFRNSLYLNIHQQIHTGEKPYKC…							1/1:1:40	4.3e-08	KMTHGDLEMYFTKDEWEELQDWEKEVYRDIKEHYDVIISF	1/1:3:40	4.3e-16	THGDLEMYFTKDEWEELQDWEKEVYRDIKEHYDVIISF	1/1:3:40	5.4e-09	THGDLEMYFTKDEWEELQDWEKEVYRDIKEHYDVIISF	1/1:3:40	4.6e-24	THGDLEMYFTKDEWEELQDWEKEVYRDIKEHYDVIISF	1/1:3:40	6.3e-28	THGDLEMYFTKDEWEELQDWEKEVYRDIKEHYDVIISF
488	lcha ZNF		JH127578.1(258364-259835;-)	lcha	Latimeria chalumnae	Coelacanth	Sarcopterygii (lobe-finned fishes)		IALYRTLEDSRATMEKPFQEEKTGLLLVGKTEPIWEKIDVNSQEGTRNMLVNPEPFDVEKTFEDIEMYFTKDVWEELQDWEKEVYRDIKEHYDVIISFGYKIEKPEFMSQIEETCALPMCESTPSSDVLQNSMSNNANTFSNNSSECSSGSADTSEAQAESQEVCHFQYVEGQYEKFLTDSSVLNTNYQVYPGENPYKYVDCGQDFSHMSTFNIHQRIHTQDKRHICIDCGMSFPRFSALETHQRNCDGKKPYECQACGKAFSHLPTLITHQRIHTGEIIFECIECKEMFSSSSALTEHQQVHRGAKLHKCMECGKVFKYFSDLVRHHRSHTGEKLYKCAECGKGFSRSATLNRHLEIHKGEIFTCTECGKNFQSASYLKLHQRMHTGVTRLNCTECGK…							1/1:1:40	1.1e-07	EKTFEDIEMYFTKDVWEELQDWEKEVYRDIKEHYDVIISF	1/1:3:40	2.7e-16	TFEDIEMYFTKDVWEELQDWEKEVYRDIKEHYDVIISF	1/1:3:40	7.3e-10	TFEDIEMYFTKDVWEELQDWEKEVYRDIKEHYDVIISF	1/1:3:40	7.2e-25	TFEDIEMYFTKDVWEELQDWEKEVYRDIKEHYDVIISF	1/1:3:40	4.5e-29	TFEDIEMYFTKDVWEELQDWEKEVYRDIKEHYDVIISF
489	lcha ZNF		JH127578.1(297912-298731;-)	lcha	Latimeria chalumnae	Coelacanth	Sarcopterygii (lobe-finned fishes)		MNEHLAGKWQRSSGHGLAEVVPWDGEAGAGLEQRDRVCDGSSVDSQEETDRRTANLVSPGQSETEKMFEDVERYFTKDEWEELQDWEKEVYRDIKEHYDVIISFGYDVPKPDFMSEAEEALQLLEYEPAQCIEDQSLSPANSLFSDGGELASDISYIDPFSGSASVQHSEKKQTKGSIPQATGTFEMTHMAQNKDHGAISDHSKCAECGKSYRHLSSLKTHQRVHTGALPYKCMECGKGFRQTRNLKIHQQMHRKEKPYKCRECGKSFSQLSNLNTHQRIHTGEKPYKCRECGKSFSWSGTLETHQRIHTGEKPYKRTECRKIFGQLSNLNTHQRIHMGEKPYKCTECRRHFRQPSALTVHQRIHTGERPYKCTECGKCFSQARDLNKHLCIHSGNKPY…							1/1:1:40	1.7e-08	EKMFEDVERYFTKDEWEELQDWEKEVYRDIKEHYDVIISF	1/1:3:40	1.2e-16	MFEDVERYFTKDEWEELQDWEKEVYRDIKEHYDVIISF	1/1:3:40	8e-11	MFEDVERYFTKDEWEELQDWEKEVYRDIKEHYDVIISF	1/1:3:40	6.2e-24	MFEDVERYFTKDEWEELQDWEKEVYRDIKEHYDVIISF	1/1:3:40	9.3e-28	MFEDVERYFTKDEWEELQDWEKEVYRDIKEHYDVIISF
490	lcha ZNF		JH127578.1(313230-314637;+)	lcha	Latimeria chalumnae	Coelacanth	Sarcopterygii (lobe-finned fishes)		RNSTSTVRRENRTANPDPLEMEKTFEDIEMFFAKDVWEELQDWEKEVYWDIKEHYDTIISFGFDVPKPEFMSEVEGTRQLPLHRSTYSTEVSCRRSSDESLFNRSNESISNASYNINPISRNAAVEKQAVMQTFQQMNVVESNISCDGSGAENGLRQSVKLHQRSRRAEKLPLGLKNRKSVCHLKPIGKLSKNLTKQKPYKCKKCGECFKLPAQLEKHQRLHKVENPYRCTEYGKFLSGLGALKVPMQIHTRKKPYKCTECGKSFNQKVALRMHQNIHTGEKPFKCTECGKHFTRLHSLYLHQRIHTGEKPHNCTECGKSFRTSSELIKHQRIHTGEKPYKCVDCGKSFRNSSDLSNHQRIHTGEKPYKCTACGKSFRISSDLRNHQHIHTGEKPYKCT…							1/1:1:40	3.4e-06	EKTFEDIEMFFAKDVWEELQDWEKEVYWDIKEHYDTIISF	1/1:3:40	6.1e-12	TFEDIEMFFAKDVWEELQDWEKEVYWDIKEHYDTIISF	1/1:3:40	2.9e-09	TFEDIEMFFAKDVWEELQDWEKEVYWDIKEHYDTIISF	1/1:3:40	4e-23	TFEDIEMFFAKDVWEELQDWEKEVYWDIKEHYDTIISF	1/1:3:40	3.2e-26	TFEDIEMFFAKDVWEELQDWEKEVYWDIKEHYDTIISF
491	lcha ZNF		JH127578.1(333484-334844;+)	lcha	Latimeria chalumnae	Coelacanth	Sarcopterygii (lobe-finned fishes)		QRTMESGDQMGVILATKTEPVWERDNVSHHEETRNGTLNPDQLQLEKTFEDIETYFTKDAWEELQDWEKEVYRDIKEHYDVIISFGYDVPKPDFMSEVEETHQFPVCESALSTMGGSPVPPEDGLFRYVHEPLPSTASEVHPVGINATVQQSEENQKLYVSLHGHQQVHTVKLYKCIECGKIFKWAKVLYRHQRIHTGERPFKCGICWRSFSRSDHLDRHQQVHNQCRKCGQVFSRQEILKLHLQTHIRKNFGQLEGQLEGHKIYQQVPTAEKPYQCTQCGKTFRRSSHLNSHQRYHKREKPNKLIEYGKTLRDAVASDQLQQVQTAGKPFRYTECEECLNKSATATEKTIHAGEKPYKCTECGKCFILLHHFIVHQHIHTGEKPYKCTECGKSWV							1/1:1:40	1.5e-07	EKTFEDIETYFTKDAWEELQDWEKEVYRDIKEHYDVIISF	1/1:3:40	1.1e-16	TFEDIETYFTKDAWEELQDWEKEVYRDIKEHYDVIISF	1/1:3:40	1.2e-10	TFEDIETYFTKDAWEELQDWEKEVYRDIKEHYDVIISF	1/1:3:40	1.7e-24	TFEDIETYFTKDAWEELQDWEKEVYRDIKEHYDVIISF	1/1:3:40	1.8e-28	TFEDIETYFTKDAWEELQDWEKEVYRDIKEHYDVIISF
492	lcha ZNF		JH127578.1(349328-350716;+)	lcha	Latimeria chalumnae	Coelacanth	Sarcopterygii (lobe-finned fishes)		STCVVLTCTILLHIKFNSMTYYRKCLSNGINRTMEVLPEVEETGGVPAVKIKSIIEGDSVNKEEETQHRNINPRQLEMEKTFEDIEMYFTKGEWEELQNWEKEVYRDIKEHYDAVISFGCDVPKPDFMSEVEDTQQLSVCESLYDTEVESPLPDHNQFSDTVRYTSNTSSHVHSLCNKAPLEKDFETKQMKKTMKENFTLKGNLKTHQQIHSGEKPHKCTECGKGFTQLGNLLLHQRLHTGEKPYKCVECGKSFSRLETLRAHIQIHTGVKPYKCTVCGRSFRRCEHLERHQRIHTGEKPFKCDECGKTFRRSEHRNRHQKVHMEKKSYKCTDCGKSFQEASDLKSHQCIHTGEKLKSYKCDECEKCFTRKGNLKTHQQVHTGVKPYKCTECEKSFSRL…							1/1:1:40	7.1e-10	EKTFEDIEMYFTKGEWEELQNWEKEVYRDIKEHYDAVISF	1/1:3:40	3.8e-16	TFEDIEMYFTKGEWEELQNWEKEVYRDIKEHYDAVISF	1/1:3:40	3.2e-11	TFEDIEMYFTKGEWEELQNWEKEVYRDIKEHYDAVISF	1/1:3:40	3.7e-24	TFEDIEMYFTKGEWEELQNWEKEVYRDIKEHYDAVISF	1/1:3:40	2.9e-28	TFEDIEMYFTKGEWEELQNWEKEVYRDIKEHYDAVISF
493	lcha ZNF		JH127578.1(374393-374624;+)	lcha	Latimeria chalumnae	Coelacanth	Sarcopterygii (lobe-finned fishes)		FNKNGLLQEVMEKQQAKSNGGNTSHRTMEVSPLGDKAGIILATKTEPVWERDNISRQEETRNGTLNPDQLQLEKTFEDIETYFTKDAWEELQDWEKEVYRDIKEHYDVIISFGYDVPKPDFMSVVEEAHQLVCESRRRIKGGSAALPEDSLFRYTNQTLPRTASKAHPIGRNVIVEQKQRAHKHHDRNRLHTEEKPYVCTECRKCFKWPNHLHRHQRVHTGERPYKCGKCGKSFSRSDNFDRHQQVHREGTLFQCRVCGEFFSQLETLKAHTQIH							1/1:1:40	1.5e-07	EKTFEDIETYFTKDAWEELQDWEKEVYRDIKEHYDVIISF	1/1:3:40	1.1e-16	TFEDIETYFTKDAWEELQDWEKEVYRDIKEHYDVIISF	1/1:3:40	1.2e-10	TFEDIETYFTKDAWEELQDWEKEVYRDIKEHYDVIISF	1/1:3:40	1.7e-24	TFEDIETYFTKDAWEELQDWEKEVYRDIKEHYDVIISF	1/1:3:40	1.8e-28	TFEDIETYFTKDAWEELQDWEKEVYRDIKEHYDVIISF
494	lcha ZNF		JH127578.1(385853-388274;+)	lcha	Latimeria chalumnae	Coelacanth	Sarcopterygii (lobe-finned fishes)		STCVVLTCTILLHIKFNSMTYYRKCLSNGINRTMEVLPEVEETGGVPAVKTEPIIKGDSVNKEEETQHRNINPRQLEMEKTFKDIEMYFTKGEWEELQDWEKEVYRDIKEHYDAVISFGCDVPKPDFMSEVEDTQQLSVCESLYDTEVESPLPEHNQFSDTVRYTSNTSTDIHSFCNKAALEDFEDFETKQVKENIQQSVFQTIEETSMVQCDESSVLYDGFISEEDFRQSTELKVQHHSNIREKPYPCLDYGEGFCHLMHFNNLTEHHTEQKPYTYREYGEAFRFPTHLDSHQQFQTGEKTYKCTELERSFQRLDHLNRHQQLLTREKLYNHTDCFTLKGNLKTHQQIHSGEKPYKCTECGKGFTQLGNLMIHQRIHTGEKPYKCTDCGKSFSRVETL…							1/1:1:40	8.8e-10	EKTFKDIEMYFTKGEWEELQDWEKEVYRDIKEHYDAVISF	1/1:3:40	4.8e-18	TFKDIEMYFTKGEWEELQDWEKEVYRDIKEHYDAVISF	1/1:3:40	5.6e-11	TFKDIEMYFTKGEWEELQDWEKEVYRDIKEHYDAVISF	1/1:3:40	2.8e-24	TFKDIEMYFTKGEWEELQDWEKEVYRDIKEHYDAVISF	1/1:3:40	7.1e-29	TFKDIEMYFTKGEWEELQDWEKEVYRDIKEHYDAVISF
495	lcha ZNF		JH127578.1(449984-452417;+)	lcha	Latimeria chalumnae	Coelacanth	Sarcopterygii (lobe-finned fishes)		LNWLLQEATGSSHKMMEVMPEEEETAVVPVVKTEAVSEGDCGKSEEETQNRIMSPGQPEVEKTFEDIEMYFSKGEWEELQDWEKEVYRDIKEHYDTVILFGYEVPKPDFMSEVEQTQQLSVCELPNGTKNESPLPEHSLFGDVNESQSSISFSLYPFCNNTTMEQFERKPIKENIQQSIMQTFEETSVVRCNENNIVYDGSISEEGFRQSPKLKVQHHSSTEEKPHPCLECGEGFCHVTPFNNLSENHTEQKTYAYGEFGECFRLPTHLDSHQQFQTEEKPYKCTECGNCFQRSRHLLRHRQVHTGEKLYNCTHCEKSFTQKGNLKIHQRVHTEEKPYKCRICEKRFRQYEHCSSHERVHTEQKLFQCTDCGKNFQRLDHLNRHQLVHTREKLYKCTEC…							1/1:1:40	4.2e-09	EKTFEDIEMYFSKGEWEELQDWEKEVYRDIKEHYDTVILF	1/1:3:40	2.4e-16	TFEDIEMYFSKGEWEELQDWEKEVYRDIKEHYDTVILF	1/1:3:40	2.6e-11	TFEDIEMYFSKGEWEELQDWEKEVYRDIKEHYDTVILF	1/1:3:40	1.5e-23	TFEDIEMYFSKGEWEELQDWEKEVYRDIKEHYDTVILF	1/1:3:40	4.5e-28	TFEDIEMYFSKGEWEELQDWEKEVYRDIKEHYDTVILF
496	lcha ZNF		JH127578.1(470075-471488;+)	lcha	Latimeria chalumnae	Coelacanth	Sarcopterygii (lobe-finned fishes)		RRNSSYWTVEVTPQGEDRGGGLSVKRESVWEEATVNSQTRNTNMNLNRTEMEKIFQDIQMYFTKDVWEELQDWEKEVYRDIKEHYDTIISFGYDVPKPDFMSEVTCMPAGSIENGYPRLPKNKVFTESISDAPSNIQCCRSNTRIKHSEGKQRKGGVKQSAVQTFREKHIAKNNRKSASCDHSECEKFFSESQNLKGQQHSHRRNKPCHSLECEKEVPLLKHPNEQRKIHSEWRPGKCLKCGKDLKLSLEPDHSQQLHKRETLCKCSDCGKCHRWSGQFDTQPQVQIEEKSHKCTECGKTFRNSSAFNTHQHIHTEDKPHKCTECKKNFRNSSALNKHQRIHTGEKPYKCTECGKSFRYSEHLNRHQRTHTGEKLYRCTECGKSFRDSAALNSHQRVHT…							1/1:1:40	5.9e-07	EKIFQDIQMYFTKDVWEELQDWEKEVYRDIKEHYDTIISF	1/1:3:40	1.2e-15	IFQDIQMYFTKDVWEELQDWEKEVYRDIKEHYDTIISF	1/1:3:40	5.1e-10	IFQDIQMYFTKDVWEELQDWEKEVYRDIKEHYDTIISF	1/1:3:40	5.3e-24	IFQDIQMYFTKDVWEELQDWEKEVYRDIKEHYDTIISF	1/1:3:40	6e-28	IFQDIQMYFTKDVWEELQDWEKEVYRDIKEHYDTIISF
497	lcha ZNF		JH127578.1(480402-481395;+)	lcha	Latimeria chalumnae	Coelacanth	Sarcopterygii (lobe-finned fishes)		RRNGSYWTMEVTPQGEDRGGGLSVKRESVWEEAAVNSQEETRNTNVNLNRTEMGKIFQDIQMYFTKDAWEELQDWEKEVYRDIKEHYDTIISFGYDVPKPDFMSEVEKTQQHSACMPAGSIENGYPRLPKNRVFIESTSDTSSNVQCCRSNARIKHSEGKQRKGGVKQSAVQTFREKHIAKNNRKSTSCDHSECEKCFSQSQNLKGQQHSHRRNKPCHSLEREKEVPLLKHPNKQRKTQTEWRPGKCLKCGEDFKLSSESDHSQQLHKGEKLYKCSDCGKCTRWSGHFDTQPQVQIEEKPYKCMECGKSFKNSSALNKHQRIHTGEKPYKCTECGKSFRYSEHLNRHQQIHAGEKLYKCMECGKSFRDSSDLKSHHRVHTGEKPYKCTECRKSFTHKGN…							1/1:1:40	3.4e-07	GKIFQDIQMYFTKDAWEELQDWEKEVYRDIKEHYDTIISF	1/1:3:40	4.9e-16	IFQDIQMYFTKDAWEELQDWEKEVYRDIKEHYDTIISF	1/1:3:40	2.5e-10	IFQDIQMYFTKDAWEELQDWEKEVYRDIKEHYDTIISF	1/1:3:40	3.9e-24	IFQDIQMYFTKDAWEELQDWEKEVYRDIKEHYDTIISF	1/1:3:40	9.3e-28	IFQDIQMYFTKDAWEELQDWEKEVYRDIKEHYDTIISF
498	lcha ZNF		JH127578.1(498556-499705;+)	lcha	Latimeria chalumnae	Coelacanth	Sarcopterygii (lobe-finned fishes)		QLTMEKPVGKVTEKGPDKERASILHQKQNRDKITNPDQPEMGKTFEDIKMYFTEDVWEALQDWEKEVYRNIKEHYDVIISFGYDVPKPDFMSELEETRQFPGCESTHSTEEESLLSENSLFSDGNEFVWNPSSSSPPIRAEPLEGKQKKESAQHFVVKTFGKSSIVEDNGKHTFCSCSECGRSFKKSSEPPIHQQVHAGQKSSEGAECGKSFQDKSGPENLRQTHPKKEASQCAECGKWFCQLKRHLKLHTGERGNNCAECGKSFQTSADLDRHWLVHTKEKPHKCEECGKFFSRLDNLKKHLKIHTGKEKYQRAKYRQSFGQRENPPIFQQADPGGKKYTCTECGKSFAWLEELNRHRKIHTGQETYKCTECGKSFRQPANLNIHLKIHMGEKPYQCA…							1/1:1:40	2.6e-07	GKTFEDIKMYFTEDVWEALQDWEKEVYRNIKEHYDVIISF	1/1:3:40	2.3e-16	TFEDIKMYFTEDVWEALQDWEKEVYRNIKEHYDVIISF	1/1:3:40	1.1e-09	TFEDIKMYFTEDVWEALQDWEKEVYRNIKEHYDVIISF	1/1:3:40	1.4e-23	TFEDIKMYFTEDVWEALQDWEKEVYRNIKEHYDVIISF	1/1:3:40	6.7e-28	TFEDIKMYFTEDVWEALQDWEKEVYRNIKEHYDVIISF
499	lcha ZNF		JH127578.1(514327-514979;-)	lcha	Latimeria chalumnae	Coelacanth	Sarcopterygii (lobe-finned fishes)		LIAGNSSHQTTETQSQQEETGLILVVKTEPVWERVSVSSPEEARKGTINLDQLQMEKTLKDIKMNFSKNEWEELQDWEKEVYKDIKEHYDVITSLGYEVPKPDFMTSVEEIPQLPPCESAPVKEAAFPEMFDDSIDSNAMEVSLNSSPNTQLTSTNVILGRSDGDFEKRSTQELVLQTFNGTRTVETSENNTFYDYSGYGKCFAQPSNIGRNQQVHGGEKPYKCTECGRSFLQLGYLSTHQRLHTGENLFKCADCGKCFHRIGHLNQHQKIHSSEKPYKCLECGKSFRRLGHLNDHQRIHTGEKPFKCAECGRCFRHHGDLHVHERIHTGEKPYKCMECGKSFRRLGHLNEHKRVHTGEKPYKCTECGRSFTRPGTLNAHLQNHIGEKHV							1/1:1:40	7.9e-09	EKTLKDIKMNFSKNEWEELQDWEKEVYKDIKEHYDVITSL	1/1:3:40	1.6e-15	TLKDIKMNFSKNEWEELQDWEKEVYKDIKEHYDVITSL	1/1:3:40	3.5e-11	TLKDIKMNFSKNEWEELQDWEKEVYKDIKEHYDVITSL	1/1:3:40	2.6e-21	TLKDIKMNFSKNEWEELQDWEKEVYKDIKEHYDVITSL	1/1:3:40	5.1e-26	TLKDIKMNFSKNEWEELQDWEKEVYKDIKEHYDVITSL
500	lcha ZNF		JH127578.1(521716-522451;-)	lcha	Latimeria chalumnae	Coelacanth	Sarcopterygii (lobe-finned fishes)		PSMWFIAGSSSYQTMETQHQEGGAGVVLVVKTEPVSERPSVSSQRKARVVTMDPDQLEMEKMFEEVEIFFSQDVWEELQDWEKEVYKNIKEHYDIIVSLGYEVPKPDFMTSVEEIPQLPLCEPAPVKEAAFPEMFEDSIDSNTTEVSLNISPNTQLTSRNVILGRSDGDSEKRSTQELVLQTFSGMRTVETSENDTFYDYSGYGKCFAQPSNKNQQGHSGEKPYKCMECGKSFLQLGYLNTHQRLHTGENLFKCADCGKCFHRIGHLNQHQKIHTGEKPYKCVECGKSFRRLGHLNDHQRIHTGEKPFKCPECGRCFRHHGDLHVHQRIHTGEKPYKCTECGKSFRRLGHLNEHRRVHTGEKPYKCTECGKCFNRLGSLNAHLQNHTGEKPYNCEECGK…							1/1:1:40	3.5e-07	EKMFEEVEIFFSQDVWEELQDWEKEVYKNIKEHYDIIVSL	1/1:3:40	2.2e-14	MFEEVEIFFSQDVWEELQDWEKEVYKNIKEHYDIIVSL	1/1:3:40	2.5e-08	MFEEVEIFFSQDVWEELQDWEKEVYKNIKEHYDIIVSL	1/1:3:40	3.7e-21	MFEEVEIFFSQDVWEELQDWEKEVYKNIKEHYDIIVSL	1/1:3:40	2e-24	MFEEVEIFFSQDVWEELQDWEKEVYKNIKEHYDIIVSL
501	lcha ZNF		JH127578.1(601588-603460;-)	lcha	Latimeria chalumnae	Coelacanth	Sarcopterygii (lobe-finned fishes)		FCYRKKRSSHMTMEKLFQEKKVAVILVPETEPVKKNPTSCSLREPRGMAAGPQGSEMENAFQDIEVYFSKDEWEELQDWEKEVYRDIKEHYDVIILLGYDVPKPDFMSEVKETHRLPASTSTPSKDGKCVILPENSTVSNGNEPVISLSSTVTGRVVEMEGKEDLQQFELQSLDEAGSVKDTENISYNCSDCGVQFRQPTRLSKYQQVHPREKAFKCTGCWNRKFRDSLTDLNTSQRIQQVEKSYGCPEGGKCCSHPGGQKKHQQFNPGENSEDKKDIGRSSEFLNHQFHTREKSYNCMKCGKIFSQLREQNGDQEAPTADKLYKCAECEKCFRSHSCFNRPQQIHTGEKSFTCTECGKCFTQRINPKLHQRIHRGEKPYKCADCGKCFSQQGNFNTHR…							1/1:1:40	1.9e-09	ENAFQDIEVYFSKDEWEELQDWEKEVYRDIKEHYDVIILL	1/1:3:40	2.7e-18	AFQDIEVYFSKDEWEELQDWEKEVYRDIKEHYDVIILL	1/1:3:40	1.3e-12	AFQDIEVYFSKDEWEELQDWEKEVYRDIKEHYDVIILL	1/1:3:40	8.4e-23	AFQDIEVYFSKDEWEELQDWEKEVYRDIKEHYDVIILL	1/1:3:40	1.6e-28	AFQDIEVYFSKDEWEELQDWEKEVYRDIKEHYDVIILL
502	lcha ZNF		JH127578.1(647377-648784;-)	lcha	Latimeria chalumnae	Coelacanth	Sarcopterygii (lobe-finned fishes)		FCYRKKRSSHMTRKKLFQEKKVAVILVPETEPVKENPNSCSLREPRGMAAGPQGSEMENTFQDIEVYFSKDEWEELQDWEKEVYRDIKEHYDVIILLGYDVPKPDFMSEVKETHRLPASTSTPSKDRKCVILPENSTVSNGNEPVISLSSTVTGRVVEMEGKEDFQQFELQSLDEAGSMKDTECISYDCSDCGVQFRQPTRLSKYQQVHPREKAFKCTGCWNRKYRGSLTDLNTRSSSHPGGRKKHQQFNPGENSEHRKGIGRSSEFANHQFHTRERSYNCMKCGKIFSQLREQNGDQEAPTADKLYKCAECEKCFRSHSSFNRPQRIHMGEKSFKCTECEKCFTQRINLNLHQRIHRGEKPYKCADCGKCFSQQGNFNTHRRLHTGAKPFKCTECGKS…							1/1:1:40	4.5e-10	ENTFQDIEVYFSKDEWEELQDWEKEVYRDIKEHYDVIILL	1/1:3:40	5.2e-18	TFQDIEVYFSKDEWEELQDWEKEVYRDIKEHYDVIILL	1/1:3:40	3.7e-12	TFQDIEVYFSKDEWEELQDWEKEVYRDIKEHYDVIILL	1/1:3:40	4.4e-23	TFQDIEVYFSKDEWEELQDWEKEVYRDIKEHYDVIILL	1/1:3:40	1.8e-28	TFQDIEVYFSKDEWEELQDWEKEVYRDIKEHYDVIILL
503	lcha ZNF		JH127578.1(673393-676845;-)	lcha	Latimeria chalumnae	Coelacanth	Sarcopterygii (lobe-finned fishes)		VIACPAPSGFHQHPALCWGQGQQNLCILYAHCSLFQQQAMLSKQELFKPSSLLHLSQLVDTMTFSFLFLFVAGKSWRTAEDNGKPLREKEVAILAAKTEPVENKASVYSLTKTMGLTTEPCQLEMKKTFEDIEMYFTKDEWEELQDWEKEVYRDIKEHYDVIISLGYHVPKPDFMCKVTEPCQDLLFETTRCREQISSVLSESKSIRNVKEPTLSISSKISGKIIVEARREKLNQNNMQQCAVQPVNEASHVKEEANSFHECSACGKHFTWSARKNKCHQDDGGEETLKCTGCWNMNVSVSSSHIESRRCTEGKGDCSQPKNHKHQQAHTEENPFKLNDCGKHFSESTKFSKHERKTGGTAYKYIKCEKGFSQFEKLNQRRKVYTGDKLYKPTECEKHF…							1/1:1:40	3.5e-11	KKTFEDIEMYFTKDEWEELQDWEKEVYRDIKEHYDVIISL	1/1:3:40	2.6e-18	TFEDIEMYFTKDEWEELQDWEKEVYRDIKEHYDVIISL	1/1:3:40	6.1e-12	TFEDIEMYFTKDEWEELQDWEKEVYRDIKEHYDVIISL	1/1:3:40	7.4e-25	TFEDIEMYFTKDEWEELQDWEKEVYRDIKEHYDVIISL	1/1:3:40	8.3e-30	TFEDIEMYFTKDEWEELQDWEKEVYRDIKEHYDVIISL
504	lcha ZNF		JH127578.1(706525-707666;+)	lcha	Latimeria chalumnae	Coelacanth	Sarcopterygii (lobe-finned fishes)		ILIAGTETIMEESRVCCQREIHNVTTGSYWLARNRTLEDIEMYFTKDEWEELQDWEKAVYRDVKEHYDTIISLGYSVPKPDFMCKVEEACPPPVSETTRCKDMESPVLPENSSVSFVNDSTIIISSEISRKVIMEETDGKQKKKTTQRSLVQRFNEASSVKEKGSTFYHCSECGTTFRWPMKLTSHLVHKGEKYHNCVKCGKSFSQLGTVNTHKHVRTGEKLYKCTECGKCFRDSCNLSTHQRIHTGEKPFKCTECGESFSDLSNLKSHQRIHTGEKPYQCMKCEKSFTRLRNLHVHQRIHTGEKPYQCTECGKSFTQQITLNIHQRIHTGEKPYTCAECGKSFRDSSALKNHHRIHTGEKPYKCSECGKCFTLLGTLNKHQQTHTGEKPHKCTVCGKS…							1/1:1:40	4.2e-11	NRTLEDIEMYFTKDEWEELQDWEKAVYRDVKEHYDTIISL	1/1:3:40	3.3e-18	TLEDIEMYFTKDEWEELQDWEKAVYRDVKEHYDTIISL	1/1:3:40	1.3e-11	TLEDIEMYFTKDEWEELQDWEKAVYRDVKEHYDTIISL	1/1:3:40	1e-23	TLEDIEMYFTKDEWEELQDWEKAVYRDVKEHYDTIISL	1/1:3:40	2.1e-28	TLEDIEMYFTKDEWEELQDWEKAVYRDVKEHYDTIISL
505	lcha ZNF		JH127900.1(274032-275571;+)-1	lcha	Latimeria chalumnae	Coelacanth	Sarcopterygii (lobe-finned fishes)		KSPLILILLYLGLVSKFQDWILAGSSSRRPPEMVNLGGGMDKLLDMKREPVWEAASVDSPEKESDRSADPHQLQMEEPFEDVKTYFTEDEWAGLQDWEKEVYRTLKEHYDLIILSGHYISKPDFMCRVKGNRQITECELTHSVGEAPLVQPETNTAHKVMEFPMTSDVQTIKGSTIMEKSGRKQKNESRQQLALQETYFTKDEWAELQDWEKEVYKDLKEHYDTIISFGYYISRPDFMCESKETHQEPAREEGFSLTHPETNTLRKSTRSPLPISYSIQLKNDSNMLEKLGEAEENENTHVSRVQEFQERSAIQSKEHSFYGCFKCKEKFNCLETLQRHLEIHENKRNQCTIYKKERRHSKYVTPHQEEARGGERPGQQNCVESLTQSVDKPMETGKKR…							1/1:1:39	1.1e-06	EEPFEDVKTYFTEDEWAGLQDWEKEVYRTLKEHYDLIIL	1/1:3:39	1.6e-10	PFEDVKTYFTEDEWAGLQDWEKEVYRTLKEHYDLIIL	1/1:3:39	2e-08	PFEDVKTYFTEDEWAGLQDWEKEVYRTLKEHYDLIIL	1/1:3:39	9.4e-19	PFEDVKTYFTEDEWAGLQDWEKEVYRTLKEHYDLIIL	1/1:3:39	1.4e-21	PFEDVKTYFTEDEWAGLQDWEKEVYRTLKEHYDLIIL
506	lcha ZNF		JH127900.1(274032-275571;+)-2	lcha	Latimeria chalumnae	Coelacanth	Sarcopterygii (lobe-finned fishes)		KSPLILILLYLGLVSKFQDWILAGSSSRRPPEMVNLGGGMDKLLDMKREPVWEAASVDSPEKESDRSADPHQLQMEEPFEDVKTYFTEDEWAGLQDWEKEVYRTLKEHYDLIILSGHYISKPDFMCRVKGNRQITECELTHSVGEAPLVQPETNTAHKVMEFPMTSDVQTIKGSTIMEKSGRKQKNESRQQLALQETYFTKDEWAELQDWEKEVYKDLKEHYDTIISFGYYISRPDFMCESKETHQEPAREEGFSLTHPETNTLRKSTRSPLPISYSIQLKNDSNMLEKLGEAEENENTHVSRVQEFQERSAIQSKEHSFYGCFKCKEKFNCLETLQRHLEIHENKRNQCTIYKKERRHSKYVTPHQEEARGGERPGQQNCVESLTQSVDKPMETGKKR…							1/1:1:38	2.6e-05	QLALQETYFTKDEWAELQDWEKEVYKDLKEHYDTIISF	1/1:1:38	1.1e-11	QLALQETYFTKDEWAELQDWEKEVYKDLKEHYDTIISF	1/1:1:38	1.3e-07	QLALQETYFTKDEWAELQDWEKEVYKDLKEHYDTIISF	1/1:1:38	8e-21	QLALQETYFTKDEWAELQDWEKEVYKDLKEHYDTIISF	1/1:1:38	1.5e-23	QLALQETYFTKDEWAELQDWEKEVYKDLKEHYDTIISF
507	lcha ZNF		JH127900.1(288356-291254;-)	lcha	Latimeria chalumnae	Coelacanth	Sarcopterygii (lobe-finned fishes)		TLAGSSSRKTTEIVNLRGETDNIFIPDPEAVCEKASACSQETSNMPAIPDQLQTEETFEDIKMYFTKDEWAELQDWEKEVYKSLKEHYDIIISFGYYISKPDFMCEIKETQQMSDSVSSHCSWDKSPIQPETNAVRKIIGPPFSSPSNIHLMSDGTTMEKSGGVEQNKITHQSMVPEIQERSAIQNKEHRFYGCSNCKEKFNCLETLQRHLEIHENKHNECTSYKRERSHSKYVTPHQEEARGGGRQNCVESLTQSVDKPMQTGKKRGRCTKVQRPRGQQPSQLGQQPILIGEKPQKSTAFVKKVKGSSTLKKHQKILTEGKPYKCTECGKCFTEERNLNVHKQTHTGEKPYKCTECGKSFTEERNLNVHKXXXXXXXXXXXXXXXXXXXXXXXXXXXX…							1/1:1:40	3e-08	EETFEDIKMYFTKDEWAELQDWEKEVYKSLKEHYDIIISF	1/1:3:40	8.3e-17	TFEDIKMYFTKDEWAELQDWEKEVYKSLKEHYDIIISF	1/1:3:40	4e-11	TFEDIKMYFTKDEWAELQDWEKEVYKSLKEHYDIIISF	1/1:3:40	2.5e-24	TFEDIKMYFTKDEWAELQDWEKEVYKSLKEHYDIIISF	1/1:3:40	3e-28	TFEDIKMYFTKDEWAELQDWEKEVYKSLKEHYDIIISF
508	lcha ZNF		JH127900.1(315184-316423;-)	lcha	Latimeria chalumnae	Coelacanth	Sarcopterygii (lobe-finned fishes)		TLAGSSSHKATEIGSFGGYTDKIFISDPEAMCDRTSAIRQLETSNMLQNPHQLQAEETFEDIKM*FTKDEWVELQDWEKEVYKSLKEYYDIIISFGYYISKPDFMNDIKETQQMSDSILSHCSWDKSPIQAETNVVRTLIKSTFPVPSRIHPSNDSNNMKQSGEAEENENTHVSRVQELQERSAIQSKEHSFYGCSECKEKCNCLGTIQRHLEDQENSHTPCTRYESERSRSDCVKLHQEEARRGKRAERQNCEESIMHFIHQPMETGKKRGRCTKDQQLNSQQLFQLGQQLLHMGEKPQKPTVSARKITISSVVDKLQRILTAKKSNKCTACGKCLTQIGALNSRRQKCKECGKAFGKYQMLKKRKRIHTGEKPYKCTECGKCFTEVGPLNRHKEIHT…							1/1:1:40	7.3e-07	EETFEDIKMXFTKDEWVELQDWEKEVYKSLKEYYDIIISF	1/1:3:40	3.6e-13	TFEDIKMXFTKDEWVELQDWEKEVYKSLKEYYDIIISF	1/1:3:40	6e-09	TFEDIKMXFTKDEWVELQDWEKEVYKSLKEYYDIIISF	1/1:3:40	1.3e-21	TFEDIKMXFTKDEWVELQDWEKEVYKSLKEYYDIIISF	1/1:3:40	6.8e-24	TFEDIKMXFTKDEWVELQDWEKEVYKSLKEYYDIIISF
509	lcha ZNF		JH127900.1(380493-381480;-)	lcha	Latimeria chalumnae	Coelacanth	Sarcopterygii (lobe-finned fishes)		TLAGSSSHKTMEIGHFGGYTDKIFISDPEAMCDRASAIRQLETSNMLQNPHHLQAEAFEDIKMYFTKDEWVELQDWEKEVYKSLKEHYDIIISFGYYISKPDFMCEIKETQQMSDSVSSHCSWDKSPIQPETNAVRKLIKSTFPVPSRIHPSNDSNIIKQTGEAEENENTHVSRVQEFQEMSAIQSKEHSFYGCSECKEKCNCLGTIQRHLENQKNSHTPCTSYERERGHSDCVKLHQEEARRGKRAERQNCEESIMHFIHQPMETGKKRGRCTKDQQLSSQQPSQLGQQQILMGEKPQKSTVSARKIKSSSAANEHQRILPAEKSYKCTDCGKCFTQIGALNSHRQTHTGQKPYKCEECRKAFGKYQRLKKYRRIHTREKPYKCTECGKCFSEDWGFT…							1/1:1:40	3.6e-07	AEAFEDIKMYFTKDEWVELQDWEKEVYKSLKEHYDIIISF	1/1:3:40	1.9e-16	AFEDIKMYFTKDEWVELQDWEKEVYKSLKEHYDIIISF	1/1:3:40	6.6e-11	AFEDIKMYFTKDEWVELQDWEKEVYKSLKEHYDIIISF	1/1:3:40	1.1e-23	AFEDIKMYFTKDEWVELQDWEKEVYKSLKEHYDIIISF	1/1:3:40	1.2e-27	AFEDIKMYFTKDEWVELQDWEKEVYKSLKEHYDIIISF
510	lcha ZNF		JH127900.1(407625-410527;-)	lcha	Latimeria chalumnae	Coelacanth	Sarcopterygii (lobe-finned fishes)		SLAGNSSHKTTEIVNLGGETDKMFVSHPEAICDRASAISQMEASNMPENPDQFQTEETFQDIKMYFTKDEWAELKDWEKEVYKSLKEHYDIVISFGYYISKPDFMCEIKETQQMSDSVSSHCRWDKSSKQPETNALRKLIKSTFPVPSRIHPSNNSNNMKKSGEAEQNENTHVSRVQEFQERSAIQSKEHSFYGCSECKEKCNCLGTLQRHLEDQKNSHTPYTSYERERGRSDCVKLHHEEARRGKRAERQNCEESIMHFIHQPMETGKKRGRCTKDQQFSSQQPSQLGQQQILMGEKPQKSTVSARKIKSSSAANELQRILPAEKTNKCTDCGKCFTQIGALNSHRQTHTGQKPYKCEECGKAFGKYQRLKKYRQIHTGGKPYKCTENGKSFSEVGSL…							1/1:1:40	5.1e-08	EETFQDIKMYFTKDEWAELKDWEKEVYKSLKEHYDIVISF	1/1:3:40	2.6e-16	TFQDIKMYFTKDEWAELKDWEKEVYKSLKEHYDIVISF	1/1:3:40	2.3e-11	TFQDIKMYFTKDEWAELKDWEKEVYKSLKEHYDIVISF	1/1:3:40	2.8e-23	TFQDIKMYFTKDEWAELKDWEKEVYKSLKEHYDIVISF	1/1:3:40	7.6e-27	TFQDIKMYFTKDEWAELKDWEKEVYKSLKEHYDIVISF
511	lcha ZNF		JH127900.1(430782-432923;-)	lcha	Latimeria chalumnae	Coelacanth	Sarcopterygii (lobe-finned fishes)		SLAGNSSHKTSEIVNFGGATDEIFVSHPEAICDRVSAISQMETNNMPANPDQLQAEETFEDIKMYFTKDEWVELKDWEKEVYKSLKEHYDIIISFGYYISKPDFMCEIKETQQMSDSVSSHCSWDKSPIQPETNAVRKLIKSTFPIPSRIHPSNDSNIIKQSGEAEENENTHVSRVQEFQERSAIQSKEHSSYGCSECKEKCNYLGTLQRHLENKKNSHTLCTIYERERGHSDCVKLHHEEARRGKRAERQNCEESIMHFIHQPMETGKKRGHCTKDQQFSSQQPSQLGQQPILMGEKPQKSSVSARKIKSSSAVNELQRILPAEKTNKCTECGKYFVQDGALNSHRQTHTGQEPYKCEECGKAFGKYQRLKKHKRIHTGEKPYKCTEYGKRFSEVGSL…							1/1:1:40	1.1e-07	EETFEDIKMYFTKDEWVELKDWEKEVYKSLKEHYDIIISF	1/1:3:40	1.1e-15	TFEDIKMYFTKDEWVELKDWEKEVYKSLKEHYDIIISF	1/1:3:40	1.5e-10	TFEDIKMYFTKDEWVELKDWEKEVYKSLKEHYDIIISF	1/1:3:40	2.9e-23	TFEDIKMYFTKDEWVELKDWEKEVYKSLKEHYDIIISF	1/1:3:40	1.2e-26	TFEDIKMYFTKDEWVELKDWEKEVYKSLKEHYDIIISF
512	lcha ZNF		JH127900.1(461984-463724;-)	lcha	Latimeria chalumnae	Coelacanth	Sarcopterygii (lobe-finned fishes)		TLAGSSSHKTMEIGYFGGETDKIFISDQEAMCDRASAISQLETSNMPENPDQLQAEETFEEIKMYFTKDEWVELQDWEKEVYKSLKEHYDIIISFGYYISKPDFMCEIKETQQISDSISSHCSWDRPPIQPETNVVRKLIKSTFPVPSRIHPSNDSNNMKQSGEAEENENTHVSRVQEFQERSAIQSKEHSFYGCSECKEKCNCLGTIQRHLENQKNSHTPCTSYERERGPSDCVKLHHEEARRGKRAECQNCEESIMHFIYQPMETGKKRGRCTKDQQLSSQQPSQLGQQLLHMGEKPQKLTVSARKIKSSSAVNKHQRILTAEKSNKCTECGKCFTQVGALNSHRQTHTGQKPYKCEECGKAFGKYQTLKKHKQIHTGEKPYKCTECGKSFTVAGSL…							1/1:1:40	9.1e-07	EETFEEIKMYFTKDEWVELQDWEKEVYKSLKEHYDIIISF	1/1:3:40	3e-15	TFEEIKMYFTKDEWVELQDWEKEVYKSLKEHYDIIISF	1/1:3:40	1.1e-09	TFEEIKMYFTKDEWVELQDWEKEVYKSLKEHYDIIISF	1/1:3:40	1.8e-23	TFEEIKMYFTKDEWVELQDWEKEVYKSLKEHYDIIISF	1/1:3:40	1.4e-26	TFEEIKMYFTKDEWVELQDWEKEVYKSLKEHYDIIISF
513	lcha ZNF		JH127900.1(488278-489922;-)	lcha	Latimeria chalumnae	Coelacanth	Sarcopterygii (lobe-finned fishes)		TLSGSSSHKTTDIGSLGGETDKTFTSNPEAMCDRASAISQLETSNMPENPDQLQAEETFEDIKMYFTNDEWAELQDWEKEVYKSLKEHYDIIISFGYYISKPDFMCEIKETQQMSDSVSSHYSWDKSPIQPETNAVRRLIKSAFPVPSRIHPSNDSNNMKQSGEAEENENTHVSRVQEFQERSAIQSKEHSFYGCSECKEKCNYLGTLQQHLKDQKNSHTPCTSYERERGRSDCVKLHQEEARRGKRAERQNCEESIMHFIYQPMETGKKRGRCTKDQQLSSQQPSQLGQQLILMGEKPQKSSVSARKIKNSSAVNEHQRILTAEKSNKCTECGKCFTQVRALNSHRQTHTGQKPYKCEECGKCFSHVGLLNRHKRIHTREKAYQCTECGKSFTEEGSL…							1/1:1:40	5.2e-08	EETFEDIKMYFTNDEWAELQDWEKEVYKSLKEHYDIIISF	1/1:3:40	6.5e-16	TFEDIKMYFTNDEWAELQDWEKEVYKSLKEHYDIIISF	1/1:3:40	1.1e-10	TFEDIKMYFTNDEWAELQDWEKEVYKSLKEHYDIIISF	1/1:3:40	6.5e-24	TFEDIKMYFTNDEWAELQDWEKEVYKSLKEHYDIIISF	1/1:3:40	1.7e-27	TFEDIKMYFTNDEWAELQDWEKEVYKSLKEHYDIIISF
514	lcha ZNF		JH127900.1(511500-513481;-)	lcha	Latimeria chalumnae	Coelacanth	Sarcopterygii (lobe-finned fishes)		TLAGSSNHKTTEIGNLGGETDKILISDPEAMSDRTSAISQLETSKMPENPDQLQAEEAFEDIKMYFTKDEWAELQDWEKEVYRNLKEHYDIIISFGYYISKPDFMCEIKETQQMSDSISSHCSWDKCPIQPETNTGRRLIKSTFPVPSRIHPSNDSNIMKKSGEAKENENIHVSRVQEFQERSAIQSKEHSFYGCSECKEKCNCLGTLQRHLENKKNSHTPCASYERERSRSDCVNLHHEEARRGKRTECQNCAESIMHFIHHPMETGKKRGRCTKDQQLSSQQLSQLGQQPILMGEKPQKSSVSARKIKSSSAVNELQQILTAEKTNKCIECGKCFTQVGALNSHRQTHTEQKPYECEECGKVFGKYQRLKKHRRIHTGEKPYKCTDCRKCFTRVENL…							1/1:1:40	2.2e-08	EEAFEDIKMYFTKDEWAELQDWEKEVYRNLKEHYDIIISF	1/1:3:40	5.3e-19	AFEDIKMYFTKDEWAELQDWEKEVYRNLKEHYDIIISF	1/1:3:40	8.2e-12	AFEDIKMYFTKDEWAELQDWEKEVYRNLKEHYDIIISF	1/1:3:40	1.7e-24	AFEDIKMYFTKDEWAELQDWEKEVYRNLKEHYDIIISF	1/1:3:40	7.4e-30	AFEDIKMYFTKDEWAELQDWEKEVYRNLKEHYDIIISF
515	lcha ZNF		JH127900.1(526650-527967;-)	lcha	Latimeria chalumnae	Coelacanth	Sarcopterygii (lobe-finned fishes)		TLAGSSNHKTMEIVNLGGETCKIFVPDPEAKCDRVSTISQLETSKMPENPDQLQAEETFEDIKMYFTKDEWMELQDWEKEVYKSLKEHYDIIISFGYYISKPDFMCEIKETQQMSDSILSHCSWDKSPIQSETNTVRKLIEPPFSSPSNIYPMSELHTGKKLYKCTECGKGFTQVGSLNIHKRLHTGEKPYKCTECGKCFSRVGSLNIHKRLHTGEKPYKCMECGKSFTEVGHLNRHKRIHTGEKPYKCTECGKSFTEVRHLNRHKRIHTGEKPYKCMECGKSFTEVGHLNRHKRIHTGEKPYKCMECGKSFTEVGNLNRHKRIHTGEKPYKCTECGKCFNQLGDLNSHKLIHTGEKPYKCTECGKCFTQLGGLNSHXXXXXXXXXXXXXXXXXXXXXX…							1/1:1:40	1.2e-07	EETFEDIKMYFTKDEWMELQDWEKEVYKSLKEHYDIIISF	1/1:3:40	1.3e-15	TFEDIKMYFTKDEWMELQDWEKEVYKSLKEHYDIIISF	1/1:3:40	2.6e-10	TFEDIKMYFTKDEWMELQDWEKEVYKSLKEHYDIIISF	1/1:3:40	4.6e-24	TFEDIKMYFTKDEWMELQDWEKEVYKSLKEHYDIIISF	1/1:3:40	4.5e-27	TFEDIKMYFTKDEWMELQDWEKEVYKSLKEHYDIIISF
516	lcha ZNF		JH127900.1(569594-572513;-)	lcha	Latimeria chalumnae	Coelacanth	Sarcopterygii (lobe-finned fishes)		TLAGNSSHKTTETGSLGRETEKMFVSDPEAMCDRANAIRQLETSNMSENPGQLQAEETFEDIKMYFTKDEWAELQDWEKEVYKSLKEHYNIIISFGYYISKPDFMCEIKETQQMSDSVSSHCSWDKSPIQPETNTVRTLVKSTFPVPSRIYPSNDSNIVKQSGEAEENENTHVSRVQEFQERSAIQSKEHSFYGCSECKEKCNCLGTLQRHLEEQKNSHTPCTRYESERSRSDCIKLHQEEARRGKRAECQNCEESIMHFVHQPMETGKKRGRCTKDQQLSSQQLSQLGQQPILMGEKAQKSTVSARKIKSSSAVNELQRILTAEKSNKCTECGKCFTQVGALSSHRQTHTGQKPYKCEECGKSFTRVDHLNVHKLIHTGEKTYNCTECGKSFTQVGSL…							1/1:1:40	2e-08	EETFEDIKMYFTKDEWAELQDWEKEVYKSLKEHYNIIISF	1/1:3:40	1.2e-16	TFEDIKMYFTKDEWAELQDWEKEVYKSLKEHYNIIISF	1/1:3:40	5.6e-11	TFEDIKMYFTKDEWAELQDWEKEVYKSLKEHYNIIISF	1/1:3:40	9.1e-24	TFEDIKMYFTKDEWAELQDWEKEVYKSLKEHYNIIISF	1/1:3:40	1.2e-27	TFEDIKMYFTKDEWAELQDWEKEVYKSLKEHYNIIISF
517	lcha ZNF		JH128062.1(112142-112961;+)	lcha	Latimeria chalumnae	Coelacanth	Sarcopterygii (lobe-finned fishes)		LQENMDILIVKSEPDWGASEINSQEESRNISVNLEKLKMEEAFKGIKKYFTKDEWTELQVWEKEVYRDIKEHYDIVITFGHEIPKPDFMSEIKETHQLPVCEFALSKEGESPTQPEANSVSHLQESILSISNIQPISVSINVDASRETQKNRNITCCVIQAFEERNIGQSKEQSFYNCSEGEEKDYEHQPMKIGKTGYNNSDGHKICDQIPFQYANLKGLVDKKYKCSECGSSFRCAPDLSTHKLIHTGEKPHKCTECEWRFRRSSDLTVHKRIHTGEKPYKCKECGKSFTHSSHFTVHKRTHTGEKPYKCTECGKCFIRLSNLNGHLRIHTGEKPYKCTECGKSFSHSSDLTKHKRIHTGEKPYNCTECGKSFRQSSDLSTHKQLHTGEKPFKCSNCG…							1/1:1:40	5.4e-06	EEAFKGIKKYFTKDEWTELQVWEKEVYRDIKEHYDIVITF	1/1:3:40	4.3e-15	AFKGIKKYFTKDEWTELQVWEKEVYRDIKEHYDIVITF	1/1:3:40	1.1e-10	AFKGIKKYFTKDEWTELQVWEKEVYRDIKEHYDIVITF	1/1:3:40	6.7e-22	AFKGIKKYFTKDEWTELQVWEKEVYRDIKEHYDIVITF	1/1:3:40	6.9e-26	AFKGIKKYFTKDEWTELQVWEKEVYRDIKEHYDIVITF
518	lcha ZNF		JH128062.1(119963-120782;+)	lcha	Latimeria chalumnae	Coelacanth	Sarcopterygii (lobe-finned fishes)		KSSNHKRMENLLQKNMDIFIVTTEPGWEGNGINSQEETRNMSFNLEILKMEEAFKDIKKYFTNDEWAELEVWEKEVYRDIKEHYDIVITFGHEIPKPDFMSEIKKTHQLPVCELALCKEDEPPTQPEANRVSHLQESTLSISNIQPISVSINVDASREIQNRNMTHSAVQAFEERNIGQSKEQNFYNYCECEEKMDCELQPMKTVKAEHSCTDGQQLCGEIPFQYVHLQVITVDKKYKCLTCGSNFRQASDLSTHNQIHTGERFYKGNECGNSFIHSSPLNIQQQNPTGEKLHKCTDCGKSFIRLSNLNTHLRIHTGEKPYKCAECGKSFSHSPDLTKHKRIHTGEKPYKCTECGKSFTQLSNLNAHKQIHTEEKPYKCAECGKGFRQSSDLSTHTQLH…							1/1:1:40	8.9e-07	EEAFKDIKKYFTNDEWAELEVWEKEVYRDIKEHYDIVITF	1/1:3:40	1.8e-15	AFKDIKKYFTNDEWAELEVWEKEVYRDIKEHYDIVITF	1/1:3:40	2.2e-11	AFKDIKKYFTNDEWAELEVWEKEVYRDIKEHYDIVITF	1/1:3:40	2.8e-21	AFKDIKKYFTNDEWAELEVWEKEVYRDIKEHYDIVITF	1/1:3:40	2.9e-25	AFKDIKKYFTNDEWAELEVWEKEVYRDIKEHYDIVITF
519	lcha ZNF		JH128062.1(213681-214500;+)	lcha	Latimeria chalumnae	Coelacanth	Sarcopterygii (lobe-finned fishes)		IIAGSSNHGRMEELLQEGEADGIHVIKIEPDWEEAKNMPVNADQTKMEETFEEIELYFNKDEWVELQDWEKEVYRDIKEHYDIIISFGYEFPKPDFMCQIKEAHPLLMCESLCREDAAVMLTETNSVCHFTESLSAISSNIEFNNGKTKVGNSGGMEKVQIIQHVAEQVLQDRNITQSKESSSYNSSASEERNSENQSMQTGKKGYNCTEPQQYCHPQSFQHGQQQVLTAEKSYNYVEHRNFFYQAPTVNVYQNIHPREKPYRCLECGKSFTQSSTLITHKRIHTGEKPYKCAECGKSFIQISHLNTHKQTHTGEKPYKCTECGKSFSQSSHLNTHKQIHTEEKPHKCTECGKSFRQITHLIRHQQIHTGSKPFKCSECGKSFSQSSTLNTHLRVHTGE…							1/1:1:40	1.2e-06	EETFEEIELYFNKDEWVELQDWEKEVYRDIKEHYDIIISF	1/1:3:40	3e-14	TFEEIELYFNKDEWVELQDWEKEVYRDIKEHYDIIISF	1/1:3:40	2.4e-09	TFEEIELYFNKDEWVELQDWEKEVYRDIKEHYDIIISF	1/1:3:40	2.2e-23	TFEEIELYFNKDEWVELQDWEKEVYRDIKEHYDIIISF	1/1:3:40	1.4e-26	TFEEIELYFNKDEWVELQDWEKEVYRDIKEHYDIIISF
520	lcha ZNF		JH128062.1(241698-243270;+)	lcha	Latimeria chalumnae	Coelacanth	Sarcopterygii (lobe-finned fishes)		NFNLNYAGRSSQMRMQELLQEEGVDRLHVTETEPDWKRTSASQEARNMLVNPDQIKMEETFEGIEMYFTKDEWAELQVWEKEVYRDIKEHYDIIISFGYEFPKPDFMCQIKEMHPLSVCESLCREDTAVILTEINSVCHFSESLLAISSNIEPTNGKTKVEKSGEIQKIKNAHIYKCTEHEKYFTQLSGLTTHQQIHKVKKPYNCVKCGKSFKYLSTFDNHTEIHKEKALKNTQCGKTFGKPSAQNGHQKIHKVEKQCKYPHSTKRFKDKSALKIHLQIQRRDKSYEYNEHGKTFKESSYPTKHKEISKAEKPYRCVDCGKNFARVSNLNAHRRIHTGEKPYNCTECGKNFTQLANLNTHKQVHTGERPYKCTECGKSFSQVSHLNTHKRIHTGEKPYK…							1/1:1:40	7.5e-08	EETFEGIEMYFTKDEWAELQVWEKEVYRDIKEHYDIIISF	1/1:3:40	8.4e-15	TFEGIEMYFTKDEWAELQVWEKEVYRDIKEHYDIIISF	1/1:3:40	5.6e-10	TFEGIEMYFTKDEWAELQVWEKEVYRDIKEHYDIIISF	1/1:3:40	3.8e-24	TFEGIEMYFTKDEWAELQVWEKEVYRDIKEHYDIIISF	1/1:3:40	3.6e-28	TFEGIEMYFTKDEWAELQVWEKEVYRDIKEHYDIIISF
521	lcha ZNF		JH128062.1(252380-254816;-)	lcha	Latimeria chalumnae	Coelacanth	Sarcopterygii (lobe-finned fishes)		RRMEELFQEGDRDGFQVKFEPDWERVSTSQEDARNMPVNPGQVKMEETFEDLETYFSKNEWAELQDWEKEVYRDIKEHYDIIISFGYEFPKPDFMCHIKETHLLFVCESLCREDTSVILTEANNICHFNESLLAISSNVEPTNGKPKVIKSEGIKTNESIQHVAEQVSHDRNITESKESSLYESSDSEERDNENQSMKIRKNGHNCTEPQQCYHPQSFQHGQQEVLTGECTKYEESLMQSSELNTHQQIHKVKEPYNCVEQGRSFKHSPSSNHSTQIHTQKSFKCEKCGKNFKKLSVLNTNHKVEKLYNCSECRKTFRQLAFNRCHETHKRRKPYQKNSSYLTKHQQLYSGEKPHQCGDCGKRFTQLSSLRAHQRIHTGEKPYKCTECGKSFSHSPDLT…							1/1:1:40	1.6e-08	EETFEDLETYFSKNEWAELQDWEKEVYRDIKEHYDIIISF	1/1:3:40	3e-16	TFEDLETYFSKNEWAELQDWEKEVYRDIKEHYDIIISF	1/1:3:40	3.6e-11	TFEDLETYFSKNEWAELQDWEKEVYRDIKEHYDIIISF	1/1:3:40	1e-23	TFEDLETYFSKNEWAELQDWEKEVYRDIKEHYDIIISF	1/1:3:40	5.4e-28	TFEDLETYFSKNEWAELQDWEKEVYRDIKEHYDIIISF
522	lcha ZNF		JH128062.1(261798-263024;-)	lcha	Latimeria chalumnae	Coelacanth	Sarcopterygii (lobe-finned fishes)		KRMEKLFREGARDGLPVKFEPDWGRASVSQEDPRNVLVNSYQIKMEETFEKIEVYFTKDEWVELHDWEKEVYRDIKEHYDIIISFGYDFPKPDFMCQTKETHPLTVCESLFREDTAVILTETNSVIHFNESFLAISSNSEPINKKNKIEKSIGTEKFQNIQHFAEQILQDRNITQSKESSLYSSESVEKDSEDRSVDTRKKDYNCTPDQQHCHPQSLQHGQEPVLTGECIEYEESLMQSSELNIHQQIHKVKEPYKYVPQGRSFEPLLSQNHYTQIHKEKSYKFKQCERSFIKSSVVNTLTTLQRIPTGEKSYECTECGKRFRHLSYYNRHLRIHTGEKPYKCVECGKNFSQISDLRIHKRIHTGEKPYKCSECGKNFRVISLLKKHNRIHTGEKPYKC…							1/1:1:40	3e-08	EETFEKIEVYFTKDEWVELHDWEKEVYRDIKEHYDIIISF	1/1:3:40	5.2e-15	TFEKIEVYFTKDEWVELHDWEKEVYRDIKEHYDIIISF	1/1:3:40	3.3e-09	TFEKIEVYFTKDEWVELHDWEKEVYRDIKEHYDIIISF	1/1:3:40	5.6e-23	TFEKIEVYFTKDEWVELHDWEKEVYRDIKEHYDIIISF	1/1:3:40	2.4e-26	TFEKIEVYFTKDEWVELHDWEKEVYRDIKEHYDIIISF
523	lcha ZNF		JH128062.1(274871-276191;-)	lcha	Latimeria chalumnae	Coelacanth	Sarcopterygii (lobe-finned fishes)		VLTSINTGSITKKKMEKLFQEGDRDGIQVKFEPDWERASVSQEDARNMPVNPAQIKIEETFEKIQVYFTKDEWAELHDWEKEVYRDIKEHYDIITSFGYKFPKPDFMCQIKEVYPLPVCGSVFIEDTAVILIDTNSLNHFSESFLAISSNSEPTNGKTKVENSGGIEKIQSIQHVAEHVLQDRNIIQSKESCLYASPDSVERDSENQSMQTGKKGYNYTKHQQHYHSLSFQHGQQQVLTGECTEYEESLMQSSELNTHQQIHKVKEPYNCVPQGSSFKHSPSSNHDTQIHKENSFKLKQCERSFMTSPVVNTLTTLQRIPTGEKYECTECGKRFRHLSYFNRHLRIHTGEKPYKCVECGKNFSQVSDLRIHKRIHTGEKPYKCPECGKNFRVLSLLKKH…							1/1:1:40	6.9e-09	EETFEKIQVYFTKDEWAELHDWEKEVYRDIKEHYDIITSF	1/1:3:40	1.6e-15	TFEKIQVYFTKDEWAELHDWEKEVYRDIKEHYDIITSF	1/1:3:40	1e-10	TFEKIQVYFTKDEWAELHDWEKEVYRDIKEHYDIITSF	1/1:3:40	1.6e-22	TFEKIQVYFTKDEWAELHDWEKEVYRDIKEHYDIITSF	1/1:3:40	8.6e-27	TFEKIQVYFTKDEWAELHDWEKEVYRDIKEHYDIITSF
524	lcha ZNF		JH128062.1(294660-296229;-)	lcha	Latimeria chalumnae	Coelacanth	Sarcopterygii (lobe-finned fishes)		HIFNLNYAGSSIQRRMEELLQEGEANGLHVTKTELNWEQASVIQKIRNIPVNPDQIKTEKTFEDIEMYFTKDEWEELQDWEKEVYRDLKKHYDIIISLGYKFPKPDFMCQIKEAHPLAVCEPLCREDTAVILTETNSVYHFNESLLAISSNTEPTNGETKVENSRGIEKIQSIQHVAEKVLQDRNITQSKESSSYNSSDSEERNSENQSMQTGKKGYNCTEPQQHCYPQSFQHGQQQVLTAEKPYKCTRCGKSFKKTSYLNAHQEIHKIEKPYKCKECGKSFKMMSYLTKHRRIHSGEKPYKCKDCGKSFSNSSTLSRHKKIHEGGKSYKCMDCGKWFRWSSHLTVHRRIHTGERPYKCIECGKSFCQLSHLNKHKRMHTRKKPYNCKKCGKRFSELST…							1/1:1:40	1.2e-09	EKTFEDIEMYFTKDEWEELQDWEKEVYRDLKKHYDIIISL	1/1:3:40	5.4e-17	TFEDIEMYFTKDEWEELQDWEKEVYRDLKKHYDIIISL	1/1:3:40	2.9e-12	TFEDIEMYFTKDEWEELQDWEKEVYRDLKKHYDIIISL	1/1:3:40	3.9e-24	TFEDIEMYFTKDEWEELQDWEKEVYRDLKKHYDIIISL	1/1:3:40	9.6e-29	TFEDIEMYFTKDEWEELQDWEKEVYRDLKKHYDIIISL
525	lcha ZNF		JH128062.1(334509-335160;-)	lcha	Latimeria chalumnae	Coelacanth	Sarcopterygii (lobe-finned fishes)		LFLEAPECCRHWKVEELLQEGEADGLHVTMTEPDWEGASVSQEEIRNMPVNPDQIKMEETFEDIEMYFTKDEWAELQNWEKEVYRDIKEHYDIILSFGYKISKPDFMSEIKESHWLPVCKCVFCREEEPVVVPQMKSGSEPNESCISISNVRATSATIKVGDTEEMQVDGVTQQCMLQVFHKRNNIQSKEQSFYNCSECEEMDCEHQPIQVRKRGYSFLDSQQLCAPVALQQGSEQIQTAVKIKKCQEYGKSYRKCLPLSKQQCSRTQDKPYQCAQCGKNFSASSTLIKHEQIHIGEKSYKCTKCGKSFKDLSNHNTHQQIHTGQKPYSCTKCGMRFIHASDLSIHQQTHAGEKPYKCTECGKSYKESSTLKKHKRIHSGEKPYKCTECGKNFRLVWSL…							1/1:1:40	1.2e-09	EETFEDIEMYFTKDEWAELQNWEKEVYRDIKEHYDIILSF	1/1:3:40	5.8e-16	TFEDIEMYFTKDEWAELQNWEKEVYRDIKEHYDIILSF	1/1:3:40	4.6e-11	TFEDIEMYFTKDEWAELQNWEKEVYRDIKEHYDIILSF	1/1:3:40	1.5e-24	TFEDIEMYFTKDEWAELQNWEKEVYRDIKEHYDIILSF	1/1:3:40	8.7e-29	TFEDIEMYFTKDEWAELQNWEKEVYRDIKEHYDIILSF
526	lcha ZNF		JH128062.1(344298-345033;-)	lcha	Latimeria chalumnae	Coelacanth	Sarcopterygii (lobe-finned fishes)		HHFIQLYTGGQFYTVVMSFCFECSDLLCFFYIKLLLEALGCCSHWKMEELLQEGEANGLCDTRTEPDWERVRVSQEETRNMPVNADQIKMEETFEDIEIYFPKDEWADLQDWEKEVYRDLKEHYDIILSFGYKISKPDFMSEIGETNWLPVCDCVFCREEESVVVPQMKSGSELNESCLNISNVRTTNATIKVGDTGEMQVDGDTQQCMLQIFHKRNNIQNKEQNFCNCSECEEMDSEHRPMQMRNRGYNCTDRQQLYIPMSLQQGREQVQTAAKITNCQEYGKSSRKWSLLNKQQHSHTQEKTYKCVQCGKSFCASSTLIKHEQFHIGEKCYKCIQCGKSFKDLSNRNRHQQIHTEQKPYKCIECGKSFIQVSELSIHQQTHTGEKPCKSTECGKSFS…							1/1:1:40	1.3e-08	EETFEDIEIYFPKDEWADLQDWEKEVYRDLKEHYDIILSF	1/1:3:40	1.8e-16	TFEDIEIYFPKDEWADLQDWEKEVYRDLKEHYDIILSF	1/1:3:40	1.2e-10	TFEDIEIYFPKDEWADLQDWEKEVYRDLKEHYDIILSF	1/1:3:40	2e-23	TFEDIEIYFPKDEWADLQDWEKEVYRDLKEHYDIILSF	1/1:3:40	4e-28	TFEDIEIYFPKDEWADLQDWEKEVYRDLKEHYDIILSF
527	lcha ZNF		JH128062.1(363053-364124;-)	lcha	Latimeria chalumnae	Coelacanth	Sarcopterygii (lobe-finned fishes)		LFLKAPGHSSHWKMEELLQEGEANGLHITMTETNWGRATVSQEETRNMPVNPDQIKMEETFEDIEMYFTKDEWAELQVWEKEVYRDIKEHYDIILSFGYKIPKPEFMSKIEETNKLPVCECVFCREDEPAVVPQMKSGSELKESCLNISNFRATNATTKVGDTGEMQIDTNAQQCVIQVFQKRNNICNKEQSFYNCSECEEMDCEHRLIQTRKRGYNCTASQQLCAPVSLQQGRKQVQIAAKITKCQEYGKSSRKCSSLNKQQHSRTQEKSYQCAQCGKSFSASSTLIKHEQIHIGEKSYKCTECGKSFKDLSNRNRHQKIHTGEKPYKCNKCGKSFIQASDLSIHQQTHTGEKPYKCTECGRSFSHSSTLIAHKRIHTGEKPYKCAECEKSFSHLSTL…							1/1:1:40	2.8e-09	EETFEDIEMYFTKDEWAELQVWEKEVYRDIKEHYDIILSF	1/1:3:40	7.9e-16	TFEDIEMYFTKDEWAELQVWEKEVYRDIKEHYDIILSF	1/1:3:40	8.1e-11	TFEDIEMYFTKDEWAELQVWEKEVYRDIKEHYDIILSF	1/1:3:40	3.9e-24	TFEDIEMYFTKDEWAELQVWEKEVYRDIKEHYDIILSF	1/1:3:40	1.4e-28	TFEDIEMYFTKDEWAELQVWEKEVYRDIKEHYDIILSF
528	lcha ZNF		JH128062.1(379111-380107;-)	lcha	Latimeria chalumnae	Coelacanth	Sarcopterygii (lobe-finned fishes)		IIAGSSSHRKMESLLKEEGMDIVIVKVEPDWEGDKVNSQKETKNMSVNPDQLKMEETFKDIKKYFTKDEWAELQDWEKEVYRDIKEHYDIVITFGHEIPKPDFMSETEKIHPACEFTLNKEDESSTQPETNSVNHLQESTLNTSNIKSISVNNNVDASREIQTNRNKTPSVQVFEEKNSEQIKEQSLYNSSECEEMECEHQPMQTGKMEYNCTEGQQVCGLVPFQHGQQSFQTGDKIPNWTGCGKSFSQSSNHNKHQRVHTSEKPYQCPDCGKDFSLLFNLNIHRQVHTTGEKPYQCPECGKGFSLLFNLNIHRQVHTTGEKPYICTECGMSFNQFANLNLHHRVHTGEKPHRCTECGKRFSRLSNLQRHQLIHTGEKPYKCTECGKSFSQPSHLNTHQ…							1/1:1:40	1.1e-07	EETFKDIKKYFTKDEWAELQDWEKEVYRDIKEHYDIVITF	1/1:3:40	6.2e-18	TFKDIKKYFTKDEWAELQDWEKEVYRDIKEHYDIVITF	1/1:3:40	1.7e-11	TFKDIKKYFTKDEWAELQDWEKEVYRDIKEHYDIVITF	1/1:3:40	1.8e-23	TFKDIKKYFTKDEWAELQDWEKEVYRDIKEHYDIVITF	1/1:3:40	3.7e-28	TFKDIKKYFTKDEWAELQDWEKEVYRDIKEHYDIVITF
529	lcha ZNF		JH128062.1(391677-392244;-)	lcha	Latimeria chalumnae	Coelacanth	Sarcopterygii (lobe-finned fishes)		LQKAAAAGEMDKQMEEEMEKRTEEGEIEKVTEEGEIEEQAEEREMEKVTGEGEMEKVTEDEEPDILQIAENESNWNRGSQEETRNILVNSDLSMLETSFDDIEIYFTPDEWEELQVWEKEVYRNIKEHYDTIISFGYQIPKPDFMSRVEEPQEFLEYGSTFSREGESPLFREMYNISQAGSSINVFHLQPITASSYMEQSRETQKDGNGSQFVGQGFEERSLQSEEQSLYDYSECKEMACELQPVQSGKMGYNSTNGEQLCGQIPFQYGQKGVYKRYKCTDCGRSFSHSDLIKQKRIQVVEKPYICTECGKSFCRVSDLSIHKRVHTGEKPYQCKVCGRSFSRITHLNTHQRIHTGEKPFKCTECGKSFRQIAHLNIHQRVHTGEKPYICTACGKSYRQ…							1/1:1:40	4.4e-09	ETSFDDIEIYFTPDEWEELQVWEKEVYRNIKEHYDTIISF	1/1:3:40	4.9e-17	SFDDIEIYFTPDEWEELQVWEKEVYRNIKEHYDTIISF	1/1:3:40	7.6e-11	SFDDIEIYFTPDEWEELQVWEKEVYRNIKEHYDTIISF	1/1:3:40	6.7e-23	SFDDIEIYFTPDEWEELQVWEKEVYRNIKEHYDTIISF	1/1:3:40	5.4e-28	SFDDIEIYFTPDEWEELQVWEKEVYRNIKEHYDTIISF
[truncated: 137 more rows]

## Sheet: info
no.	Running number
Subgroup	assignment to aKRAB-A subgroup (PRDM9 orthologs; SSX ortholog/paralogs; Latimeria chalumnae aKRAB-ZNF)
Gene names	Names from database entry if available
[truncated: 28 more rows]
