# Supplementary material for: The KRAB Domain of ZNF10 Guides the Identification of Specific Amino Acids That Transform the Ancestral KRAB-A-Related Domain Present in Human PRDM9 into a Canonical Modern KRAB-A Domain
Source: Int J Mol Sci. 2022 Jan 19;23(3):1072. doi: 10.3390/ijms23031072 (PMC8835667; doi:10.3390/ijms23031072)
Supplement: Supplementary file 1 [file ijms-23-01072-s001.zip › Table_S2.xlsx]

## Sheet: Supplement AA Frequencies
		A02	A03	A04	A05	A06	A07	A08	A09	A10	A11	A12	A13	A14	A15	A16	A17	A18	A19	A20	A21	A22	A23	A24	A25	A26	A27	A28	A29	A30	A31	A32	A33	A34	A35	A36	A37	A38	A39	A40	A41	A42		B01	B02	B03	B04	B05	B06
ZNF10/13-85	human ZNF10	L	V	T	F	K	D	V	F	V	D	F	T	R	E	E	W	K	L	L	D	T	A	Q	Q	I	V	Y	R	N	V	M	L	E	N	Y	K	N	L	V	S	L		G	Y	Q	L	T	K
399	hs mKRAB	85	231	249	368	64	384	366	7	227	99	377	176	41	330	390	375	53	122	378	267	49	228	374	48	9	2	374	296	40	373	366	324	374	324	268	17	265	331	210	293	244	399	301	64	57	32	30	199
183	PRDM9 aKRAB	0	0	9	154	143	155	16	0	23	2	183	42	9	139	155	174	0	0	27	0	1	3	1	0	85	0	160	153	178	132	0	1	10	179	164	21	1	130	19	34	32	183	179	0	4	0	52	24
226	SSX aKRAB	0	0	8	217	37	200	3	0	0	0	219	3	3	77	211	219	8	0	82	0	15	0	35	0	183	22	189	0	5	5	0	0	1	124	224	4	0	2	0	15	217	226	202	0	8	1	148	2
257	lchaKZNF aKRAB	0	0	173	218	39	218	4	0	17	0	256	207	16	10	199	256	2	1	255	0	0	0	1	0	1	256	257	160	13	11	0	0	249	1	257	0	0	8	35	232	26	257	254	239	10	0	1	246
SSX1/22-97	human SSX1	S	K	A	F	D	D	I	A	T	Y	F	S	K	K	E	W	K	K	M	K	Y	S	E	K	I	S	Y	V	Y	M		K	R	N	Y	K	A	M	T	K	L		G	F	K	V	T	L
399	hs mKRAB	114	0	40	368	19	384	16	317	0	58	377	210	9	14	390	375	53	8	14	3	2	65	12	101	9	0	374	2	2	6		6	1	324	268	17	2	14	22	0	244	399	301	25	22	92	30	5
183	PRDM9 aKRAB	0	0	113	154	4	155	147	11	7	163	183	128	156	12	155	174	0	6	147	1	0	1	181	176	85	1	160	0	0	27		173	143	179	164	21	106	49	5	6	32	183	179	29	13	13	52	4
226	SSX aKRAB	0	0	186	217	122	200	218	130	26	211	219	202	189	138	211	219	8	188	144	139	102	192	173	222	183	35	189	214	186	188		222	202	124	224	4	107	215	186	131	217	226	202	126	103	110	148	157
257	lchaKZNF aKRAB	0	0	13	218	6	218	242	0	13	216	256	25	207	0	199	256	2	2	0	5	1	0	256	255	1	0	257	0	0	3		254	0	1	257	0	11	0	12	0	26	257	254	1	26	100	1	1
hs PRDM9/24-97	human PRDM9	K	D	A	F	K	D	I	S	I	Y	F	T	K	E	E	W	A	E	M	G	D	W	E	K	T	R	Y	R	N	V		K	R	N	Y	N	A	L	I	T	I		G	L	R	A	T	R
399	hs mKRAB	8	0	40	368	64	384	16	18	148	58	377	176	9	330	390	375	56	0	14	22	10	9	12	101	51	1	374	296	40	373		6	1	324	268	6	2	331	19	6	22	399	301	60	8	16	30	15
183	PRDM9 aKRAB	0	0	113	154	143	155	147	139	105	163	183	42	156	139	155	174	105	147	147	142	72	148	181	176	36	160	160	153	178	132		173	143	179	164	33	106	130	113	65	134	183	179	140	122	133	52	111
226	SSX aKRAB	0	0	186	217	37	200	218	77	0	211	219	3	189	77	211	219	52	1	144	36	0	23	173	222	8	0	189	0	5	5		222	202	124	224	1	107	2	3	1	0	226	202	51	43	68	148	8
257	lchaKZNF aKRAB	0	0	13	218	39	218	242	0	57	216	256	207	207	10	199	256	66	235	0	0	223	256	256	255	0	0	257	160	13	11		254	0	1	257	3	11	8	198	5	0	257	254	0	0	5	1	3
lcha4712/59-134	Coelacanth	K	K	T	H	E	D	I	K	R	Y	F	T	K	D	E	W	E	E	L	Q	D	W	E	K	E	V	Y	R	D	V		K	E	H	Y	D	V	V	V	S	F		G	Y	D	V	P	K
399	hs mKRAB	8	0	249	0	141	384	16	1	1	58	377	176	9	13	390	375	55	0	378	3	10	9	12	101	12	2	374	296	272	373		6	374	0	268	1	1	32	210	293	0	399	301	64	7	92	45	199
183	PRDM9 aKRAB	0	0	9	1	3	155	147	10	6	163	183	42	156	9	155	174	18	147	27	3	72	148	181	176	0	0	160	153	1	132		173	10	0	164	9	18	0	19	34	1	183	179	0	2	13	93	24
226	SSX aKRAB	0	0	8	0	15	200	218	0	4	211	219	3	189	1	211	219	144	1	82	2	0	23	173	222	0	22	189	0	0	5		222	1	0	224	32	25	0	0	15	1	226	202	0	0	110	3	2
257	lchaKZNF aKRAB	0	0	173	15	178	218	242	89	7	216	256	207	207	210	199	256	134	235	255	242	223	256	256	255	242	256	257	160	153	11		254	249	252	257	250	50	26	35	232	212	257	254	239	65	100	186	246
mgal PRDM9/80-152	Mussel PRDM9	D	A	R	S	G	D	I	E	Q	Y	F	T	N	T	Q	M	A	S	L	S	D	Y	E	K	L	R	Y	R	N	M		K	K	N	Y	E	M	M	V	K	M		G	L	P	A	Q	K
399	hs mKRAB	1	2	1	1	10	384	16	2	0	58	377	176	1	2	2	0	56	8	378	25	10	1	12	101	12	1	374	296	40	6		6	1	324	268	20	0	14	210	0	11	399	301	60	37	16	10	199
183	PRDM9 aKRAB	0	0	1	3	3	155	147	3	6	163	183	42	1	4	18	1	105	4	27	18	72	11	181	176	14	160	160	153	178	27		173	15	179	164	98	33	49	19	6	4	183	179	140	15	133	5	24
226	SSX aKRAB	0	0	0	3	5	200	218	0	18	211	219	3	1	1	5	0	52	1	82	12	0	0	173	222	0	0	189	0	5	188		222	3	124	224	150	0	215	0	131	0	226	202	51	3	68	3	2
257	lchaKZNF aKRAB	0	0	8	2	10	218	242	157	1	216	256	207	5	3	0	0	66	0	255	0	223	0	256	255	0	0	257	160	13	3		254	5	1	257	3	0	0	35	0	0	257	254	0	0	5	2	246
		A02	A03	A04	A05	A06	A07	A08	A09	A10	A11	A12	A13	A14	A15	A16	A17	A18	A19	A20	A21	A22	A23	A24	A25	A26	A27	A28	A29	A30	A31	A32	A33	A34	A35	A36	A37	A38	A39	A40	A41	A42		B01	B02	B03	B04	B05	B06
ZNF10/13-85		L	V	T	F	K	D	V	F	V	D	F	T	R	E	E	W	K	L	L	D	T	A	Q	Q	I	V	Y	R	N	V	M	L	E	N	Y	K	N	L	V	S	L		G	Y	Q	L	T	K
No AA	Tycko et al. (>10fold change)	0	1	0	0	1	14	10	1	13	0	12	2	0	0	17	3	0	1	14	1	0	0	1	2	1	1	13	1	1	10	9	2	3	11	8	1	1	8	1	2	5		0	0	0	0	1	0
P effect	Tycko et al. (>10fold change)						P	P	P	P		P				P	P			P	P			P	P	P	P	P	P	P	P	P	P	P	P	P	P	P	P	P	P	P
Mutants	Margolin1994						A	A							A	A	A															K	K	K															A
ZNF10-AB	A29, B06, B13-14	b
PRDM9	Pi-Stacking	a
PRDM9-AB		K	D	A	F	K	D	I	S	I	Y	F	T	K	E	E	W	A	E	M	G	D	W	E	K	T	R	Y	R	N	V		K	R	N	Y	N	A	L	I	T	I		G	L	R	A	T	R
ZNF10-AB	ABxZ	L	V	T	F	K	D	V	F	V	D	F	T	R	E	E	W	K	L	L	D	T	A	Q	Q	I	V	Y	R	N	V	M	L	E	N	Y	K	N	L	V	S	L		G	Y	Q	L	T	K
ZNF746/PARIS/AlChiblak2019	ABxZ	P	V	T	F	D	D	V	A	V	Y	F	S	E	Q	E	W	G	K	L	E	D	W	Q	K	E	L	Y	K	H	V	M	R	G	N	Y	E	T	L	V	S	L		D	Y	A	I	S	K
lcha 4712-AB	Coelacanth	K	K	T	H	E	D	I	K	R	Y	F	T	K	D	E	W	E	E	L	Q	D	W	E	K	E	V	Y	R	D	V		K	E	H	Y	D	V	V	V	S	F		G	Y	D	V	P	K
[truncated: 26 more columns]
