# Supplementary figures and images for: The KRAB Domain of ZNF10 Guides the Identification of Specific Amino Acids That Transform the Ancestral KRAB-A-Related Domain Present in Human PRDM9 into a Canonical Modern KRAB-A Domain
Source: MDPI journal article supplement (doi:10.3390/ijms23031072), 2022-01-19

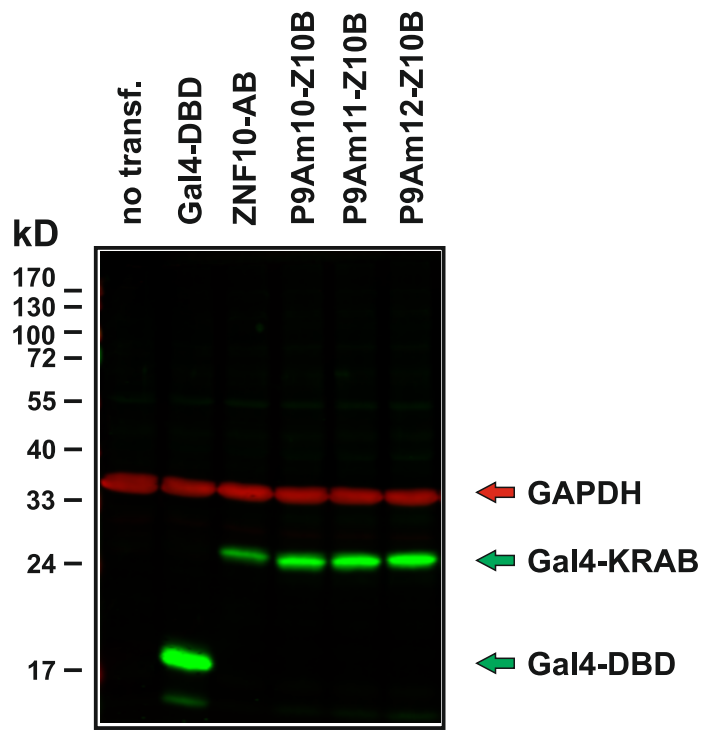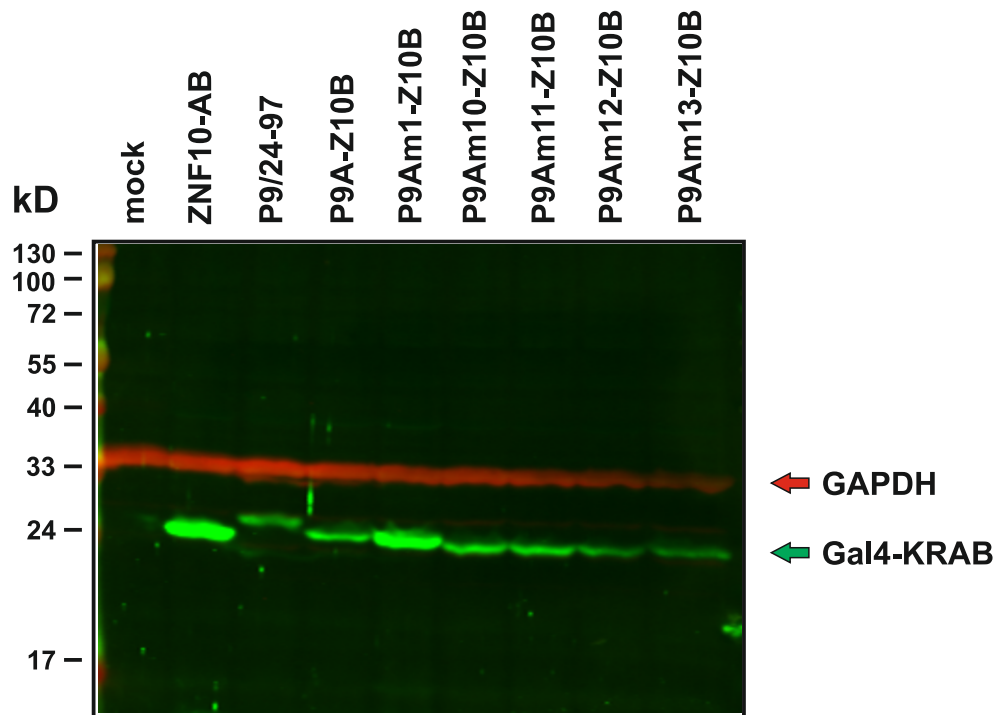

Supplement: s1 [file s1]
